# Supplementary material
Source: HighWire-hosted journal article supplement (doi:10.1101/rna.079799.123)

**A****HEK293 WT and HEK293 LARP4-KO-sc1**

CRISPR-B:-CGACATGTTGCTTTTCGTGG-PAM

WT:GAGGACGACATGTTGCTTTTCGTGGAGGTGAGTGCATTATGCTAGTCTC - Wild type sequence

Allele-A:-----TGGAGGTGAGTGCATTATGCTAGTCTC - Deletion of first exon and Promoter

Allele-B:--GAGGACGACATGTTGCTTTT-----TTATGCTAGTCTC - Insetion and Deletion in first Exon

Allele-C:--GAGGACGACATGTTGCTTTTCG----- AGTGCATTATGCTAGTCTC - Deletion in first exon

**U2OS WT and U2OS LARP4-KO-sc37**

CRISPR-B:-CGACATGTTGCTTTTC--GTGG-PAM

WT:GAGGACGACATGTTGCTTTTC--GTGGAGGTGAGTGCATTATGCTAGTCTC - Wild type sequence

Allele-A:-----GTGAGTGCATTATGCTAGTCTC - Deletion of first exon and Promoter

Allele-B:-----GTGAGTGCATTATGCTAGTCTC - Deletion of first exon and Promoter

Allele-C:--GAGGACGACATGTTGCTTTTCGTTGGAGGTGAGTGCATTATGCTAGTCTC - Single base pair insertion in CDS

**B**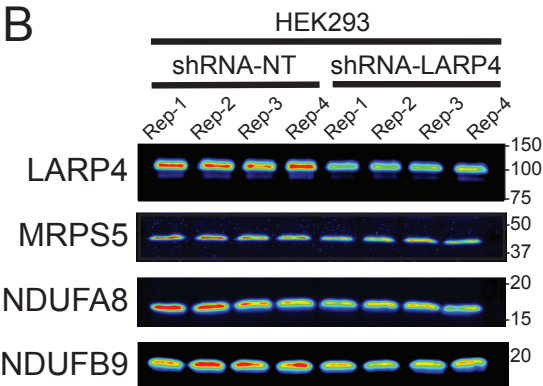**C**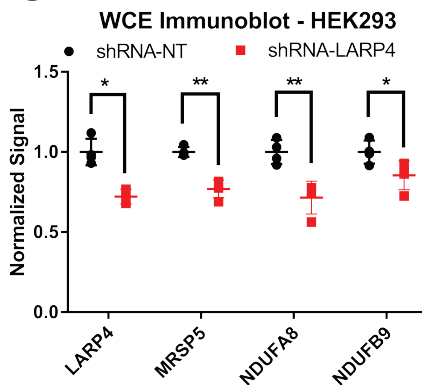**D**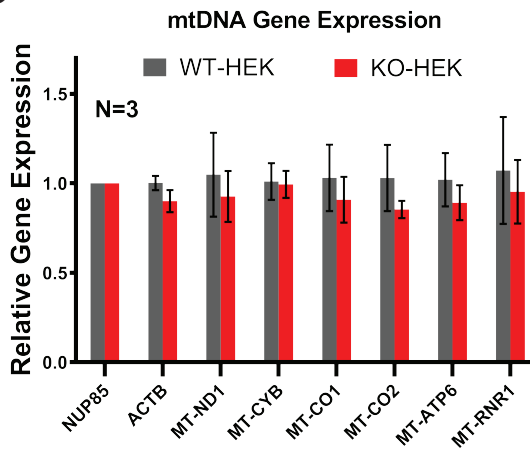**E**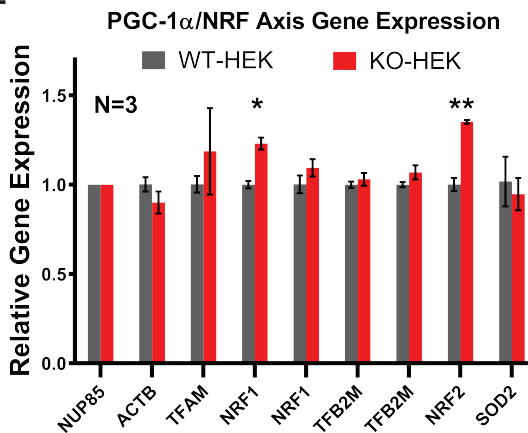

Supplement: Supplemental_Fig_S2.pdf [file Supplemental_Fig_S2.pdf]
