# Supplementary material
Source: HighWire-hosted journal article supplement (doi:10.1101/rna.079799.123)

**A** Oxygen Consumption Rate - HEK293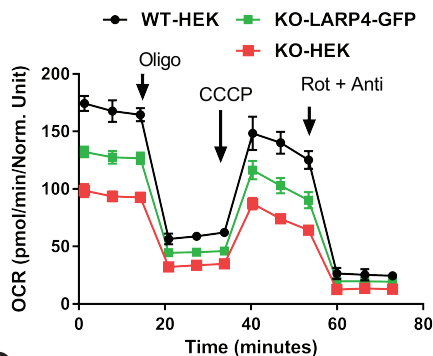**B** Mito Stress Test - HEK293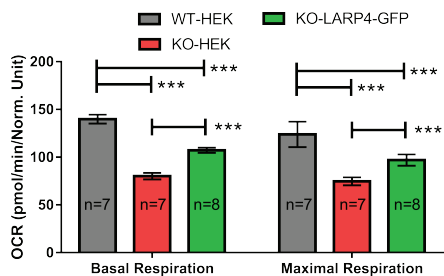**C** Oxygen Consumption Rate - HEK293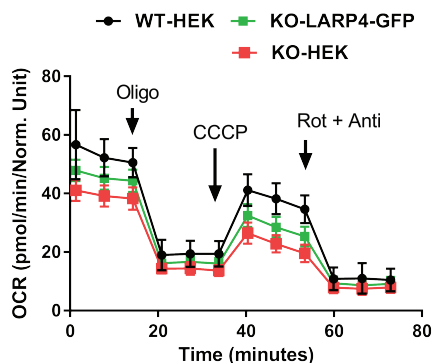**D** Mito Stress Test - HEK293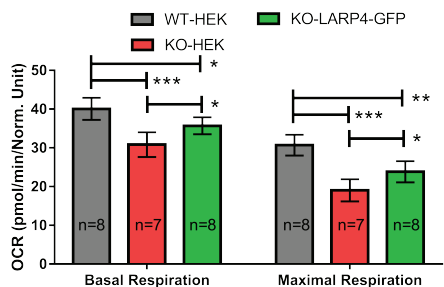**E** Oxygen Consumption Rate - U2OS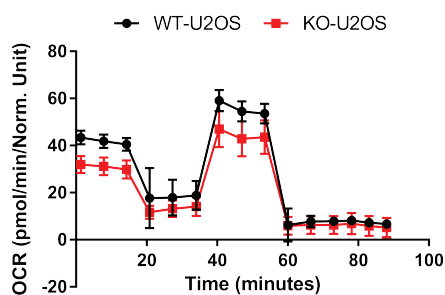**F** Mito Stress Test - U2OS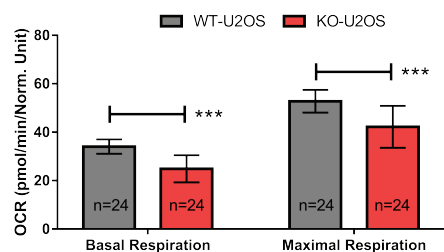**G** Oxygen Consumption Rate - U2OS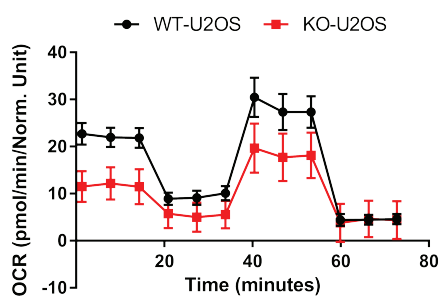**H** Mito Stress Test - U2OS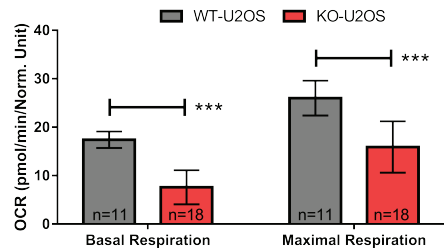

Supplement: Supplemental_Fig_S4.pdf [file Supplemental_Fig_S4.pdf]
