# Supplementary material
Source: HighWire-hosted journal article supplement (doi:10.1101/rna.079799.123)
Supplement: Supplemental_Figure_Legends.docx [file Supplemental_Figure_Legends.docx]

**Supplemental Figure Legends**

**Figure S1. LARP4 interacts with nuclear-encoded mitochondrial mRNAs. Related to Figure 1.**

**(A)** Venn diagram showing the overlap between gene-target lists of each of the three LARP4 eCLIP datasets from HEK293, HepG2, K562 cells.

**(B)** Venn diagram showing the overlap between gene-targets that are also mitochondrial genes.

**(C)** Venn diagram showing the overlap HEK293’s LARP4 eCLIP gene-target list with oxidative phosphorylation genes (HSA_00190).

**(D)** Venn diagram showing the overlap HEK293’s LARP4 eCLIP gene-target list with mitochondrial ribosome proteins (GO:0005761)

**(E)** Enrichment analysis for RNA-target set (eCLIP data) overlapping with proteins in the Translation pathway (R_HSA_72766). Only RBPs with significant overlap (p-value≤0.05, hypergeometric test) are shown.

**(F)** Enrichment analysis for RNA-target set (eCLIP data) overlapping with mitochondrial ribosome proteins (MRP-S/L) defined by gene ontology term GO_0005761. Only RBPs with significant overlap (p-value≤0.05, hypergeometric test) are shown.

(**G)** Metagene analysis of eCLIP data from HEK293 cells, HepG2 cells and K562 cells. Peak density is plotted across all genes (black), nuclear-encoded mitochondrial genes (green), OXPHOS genes (red) and mitochondrial ribosome genes (blue).

**(H)** Motif analysis of the HEK293 LARP4 eCLIP dataset. p-values calculated by hypergeometric test.

eCLIP experiments were performed in independent biological duplicates for each cell line (N=2). Gene-target lists of each eCLIP data set are defined as genes encoding an mRNA containing at least one peak that passes significance thresholds (-log10(p-value) ≥ 7, Fisher’s exact test; log2(fold-change (IP/input)) ≥ 4).

**Figure S2. Analysis of mRNA abundance and CRISPR cut site analysis. Related to Figure 2.**

**(A)** CRISPR cut site genomic analysis of the two LARP4 KO subclones by Sanger sequencing. For each of the two KO subclones (HEK293-LAPR4-KO-sc1 and U2OS-LAPR4-KO-sc37) unique edited sequences were identified for each of the three alleles that are present at the LARP4 genomic site due to aneuploidy in these cell lines. Each edited allele is aligned to the wild type sequence with insertions shown in blue, deletions indicated with a dash and the CRISPR guide RNA target site shown in red.

**(B,C)** Immunoblot analysis of HEK293 cells expressing either an shRNA targeting LARP4 (LARP4-shKD) or a non-targeting shRNA (NT-shCon) (B), with quantification of biological replicates using band intensities normalized by a quantitative total protein stain (C). N=4.

**(D,E)** Analysis of mRNA abundance in the HEK293 KO/WT cells by qPCR using probes targeting genes expressed from the mitochondrial DNA (D) or genes involved in the PGC-1alpha/NRF pathway (E). N=3.

All averages shown are from independent biological replicates. Statistical significance of differences was assessed by two-tailed unpaired Student's t-tests (*p≤0.05, **p≤0.001).

**Figure S3. Oxiblot assay and puromycin assay. Related to Figure 4.**

**(A)** Quantitative total protein stain of the blot in Figure 4C.

**(B)** Quantitative total protein stain of the blot in Figure 4E.

**Figure S4. Replicate data for Seahorse Mito Stress Test on HEK293 LARP4 and U2OS LARP4 KO cell lines. Related to Figure 5.**

**(A,B)** HEK293 LARP4 KO, Replicate 2.

**(C,D)** HEK293 LARP4 KO, Replicate 3.

**(E,F)** U2OS LARP4 KO, Replicate 2.

**(G,H)** U2OS LARP4 KO, Replicate 3.

Statistical significance of differences was assessed by two-tailed unpaired Student's t-tests (*p≤0.05, **p≤0.001, ***p≤0.0001).
