# Supplementary material
Source: HighWire-hosted journal article supplement (doi:10.1101/rna.079799.123)
Supplement: Supplemental_Table_2.xlsx [file Supplemental_Table_2.xlsx]

## Sheet: Reagents
Reagent Type	Reagent or Resource	Source or Reference	Identifiers	Additional information
Antibody	LARP4	Maraia Lab	gift	1:1000
Antibody	LARP4	Bethly	A303-900A	1:1000
Antibody	NDUFA8	Abcam	ab184952	1:20,000
Antibody	NDUFB9	Abcam	ab200198	1:5000
Antibody	COX5B	Abcam	ab180136	1:10,000
Antibody	COX6B1	Abcam	ab131277	1:1000
Antibody	COX7A2	Proteintech	18122-1-AP	1:100 (IF)
Antibody	MRPS5	Abcam	ab96291	1:1000
Antibody	MRPL24	Santa Cruz Biotechnology	sc-393857	1:100
Antibody	ATP5L	Invitrogen	PA5-60783	1:1000
Antibody	Calnexin	Santa Cruz Biotechnology	sc-11397	1:1000
Antibody	TBP	Cell Singaling	44059	1:1000
Antibody	TIMM10B	Invitrogen	PA597081	1:1000
Antibody	NDUFA1	Abcam	ab176563	1:1000
Antibody	Anti-puromycin	Milipore	MABE343	1:1000
Antibody	Anti-DNP	Milipore	S7150 (kit)	1:1000
Antibody	Goat anti-rabbit 800nm	Invitrogen	SA535571	1:20,000
Antibody	Goat anti-mouse 800nm	Invitrogen	SA535521	1:20,000
Antibody	Goat anti-rabbit Alexa flur 680	Invitrogen	A-21109	1:20,000
Antibody	Goat anti-mouse Alexa flour 680	Invitrogen	A-21058	1:20,000
Cell Culture	Seahorse XF DMEM medium	Agilent	103575-100
Cell Culture	DMEM	Corning	10-013-CV
Cell Culture	Accutase	Innovative Cell Technologies	AT104
Cell Culture	Lipofectamine 2000	Thermo-Fisher	11668030
Assay	RIPA Buffer	Thermo-Fisher	89900
Assay	cOmplete™ ULTRA Tablets, Mini, EDTA-free,	Sigma	5892791001
Assay	OxyBlot Protein Oxidation Detection Kit	Millipore	S7150
Assay	Power SYBR™ Green PCR Master Mix	Thermo-Fisher	4368577
Assay	Human Mitochondria Isolation Kit	Militenyi Biotec	130-094-532
Assay	Revert™ 700 Total Protein Stain	Li-Cor	926-11011
Assay	Pierce™ BCA Protein Assay Kit	Thermo-Fisher	23227
Assay	Immobilon-FL PVDF Membrane	Milipore	IPFL00010
Assay	Direct-zol RNA Miniprep	Zymo	R2050
Assay	Trizol	Thermo-Fisher	15596026
Assay	SuperScript™ III Reverse Transcriptase	Invitrogen	18080044
Chemical	Cycloheximide 100mg/ml	Sigma	C4859
Chemical	Carbonyl cyanide 4-(trifluoromethoxy)phenylhydrazone	Sigma	C2920
Chemical	Oligomycin	Sigma	O4876
Chemical	Antimycin A	Sigma	A8674
Chemical	Rotenone	Mp Biomedicals Inc	0215015401
Chemical	tetramethylrhodamine, methyl ester, perchlorate (TMRM)	Thermo-Fisher	T668
Chemical	DAPI (4',6-Diamidino-2-Phenylindole, Dilactate)	Thermo-Fisher	D3571
Chemical	MitoTracker™ Green FM	Thermo-Fisher	M7514
