# Supplementary material
Source: HighWire-hosted journal article supplement (doi:10.1101/rna.079799.123)
Supplement: Supplemental_Table_3.xlsx [file Supplemental_Table_3.xlsx]

## Sheet: Mito_TMT
Gene list background (All proteins detected in Mito TMT)	All proteins detected in MITO TMT-LARP4_target	l2fc(MITO_KO:WT) < neg 0.2 (Down) and p-value <0.05	l2fc(MITO_KO:WT) < neg 0.2 (Down)-LARP4_target	l2fc(MITO_KO:WT) > pos 0.2 (Up) and p-value <0.05	l2fc(MITO_KO:WT) > pos 0.2 (Up)-LARP4_target	l2fc(MITO_KO:WT) < neg 0.5 (Down) and p-value <0.05	l2fc(MITO_KO:WT) < neg 0.5 (Down)-LARP4_target	l2fc(MITO_KO:WT) > pos 0.5 (Up) and p-value <0.05	l2fc(MITO_KO:WT) > pos 0.5 (Up)-LARP4_target
PRXL2A	FALSE	PRXL2A	FALSE	RTN1	FALSE	PRXL2A	FALSE	RTN1	FALSE
EPCAM	FALSE	EPCAM	FALSE	CEND1	FALSE	EPCAM	FALSE	CEND1	FALSE
SPINT1	FALSE	SPINT1	FALSE	NME4	FALSE	SPINT1	FALSE	NME4	FALSE
LSR	TRUE	LSR	TRUE	GSTP1	TRUE	LSR	TRUE	GSTP1	TRUE
GPRC5A	FALSE	GPRC5A	FALSE	KCTD12	FALSE	GPRC5A	FALSE	KCTD12	FALSE
TIMM50	FALSE	TIMM50	FALSE	LRP1	FALSE	TIMM50	FALSE	LRP1	FALSE
CAV1	FALSE	CAV1	FALSE	MORF4L1	FALSE	CAV1	FALSE	MORF4L1	FALSE
SARS2	FALSE	SARS2	FALSE	IFI16	FALSE	SARS2	FALSE	IFI16	FALSE
HLA-A	FALSE	HLA-A	FALSE	HBG2	FALSE	HLA-A	FALSE	HBG2	FALSE
EPPK1	FALSE	EPPK1	FALSE	HBE1	FALSE	EPPK1	FALSE	HBE1	FALSE
COQ8B	FALSE	COQ8B	FALSE	HBD	FALSE	COQ8B	FALSE	HBD	FALSE
GRAMD1A	FALSE	GRAMD1A	FALSE	HBG1	FALSE	GRAMD1A	FALSE	HBG1	FALSE
ACOT1	FALSE	ACOT1	FALSE	MSN	FALSE	ACOT1	FALSE	MSN	FALSE
CEBPG	FALSE	CEBPG	FALSE	HBB	FALSE	CEBPG	FALSE	HBB	FALSE
ACOT2	FALSE	ACOT2	FALSE	HLA-DRB1	FALSE	ACOT2	FALSE	HLA-DRB1	FALSE
NDUFAF2	FALSE	NDUFAF2	FALSE	TPP2	FALSE	NDUFAF2	FALSE	TPP2	FALSE
MOSPD2	FALSE	MOSPD2	FALSE	ENO1	TRUE	MOSPD2	FALSE	ENO1	TRUE
TSPAN6	TRUE	DPY19L3	FALSE	BRD2	FALSE	DPY19L3	FALSE	BRD2	FALSE
DPY19L3	FALSE	LCP1	FALSE	CISD1	FALSE	LCP1	FALSE	CISD1	FALSE
LCP1	FALSE	RAB4B	FALSE	GDI1	FALSE	RAB4B	FALSE	GDI1	FALSE
RAB4B	FALSE	PDLIM7	FALSE	DECR1	FALSE	PDLIM7	FALSE	DECR1	FALSE
PDLIM7	FALSE	LARP4	FALSE	ACOT7	TRUE	LARP4	FALSE	ACOT7	TRUE
LARP4	FALSE	FASTKD5	FALSE	NF2	FALSE	FASTKD5	FALSE	NF2	FALSE
FASTKD5	FALSE	C18orf32	FALSE	GPC4	FALSE	C18orf32	FALSE	GPC4	FALSE
C18orf32	FALSE	SIPA1L1	FALSE	ITIH3	FALSE	SIPA1L1	FALSE	ITIH3	FALSE
SIPA1L1	FALSE	NDUFS6	TRUE	PGD	FALSE	NDUFS6	TRUE	PGD	FALSE
NDUFS6	TRUE	ATL3	FALSE	GAPDH	TRUE	ATL3	FALSE	GAPDH	TRUE
ATL3	FALSE	PLD3	TRUE	PGK1	FALSE	PLD3	TRUE	PGK1	FALSE
PLD3	TRUE	CGN	FALSE	SLC9A3R1	FALSE	CGN	FALSE	SLC9A3R1	FALSE
CGN	FALSE	SPINT2	TRUE	STOM	FALSE	SPINT2	TRUE	STOM	FALSE
SPINT2	TRUE	TP53	FALSE	PEDS1	FALSE	TP53	FALSE	PEDS1	FALSE
UBA2	FALSE	MCAM	FALSE	ZMYND8	FALSE	MCAM	FALSE	ZMYND8	FALSE
TP53	FALSE	C19orf47	FALSE	ANXA6	FALSE	C19orf47	FALSE	ANXA6	FALSE
MCAM	FALSE	MLYCD	FALSE	HBA1	FALSE	MLYCD	FALSE	HBA1	FALSE
C19orf47	FALSE	ISCA2	FALSE	BCL2L12	TRUE	ISCA2	FALSE	BCL2L12	TRUE
MLYCD	FALSE	HINT2	FALSE	ABAT	FALSE	HINT2	FALSE	ABAT	FALSE
ISCA2	FALSE	EMB	FALSE	ENO2	FALSE	EMB	FALSE	ENO2	FALSE
HINT2	FALSE	ACTN4	FALSE	ALDOC	FALSE	ACTN4	FALSE	ALDOC	FALSE
EMB	FALSE	ACTN3	FALSE	HMGA1	FALSE	ACTN3	FALSE	HMGA1	FALSE
NDUFA8	TRUE	FANCD2	FALSE	CA5B	FALSE	FANCD2	FALSE	CA5B	FALSE
ACTN4	FALSE	TJP2	FALSE	UBA1	FALSE	TJP2	FALSE	UBA1	FALSE
INTS1	FALSE	ENTR1	FALSE	RDX	FALSE	ENTR1	FALSE	RDX	FALSE
ACTN3	FALSE	IRS4	FALSE	MPP1	FALSE	IRS4	FALSE	MPP1	FALSE
FANCD2	FALSE	CDS2	FALSE	EZR	FALSE	CDS2	FALSE	EZR	FALSE
TJP2	FALSE	NEXN	FALSE	RHOA	FALSE	NEXN	FALSE	RHOA	FALSE
ENTR1	FALSE	ECH1	FALSE	GDAP1	FALSE	ECH1	FALSE	GDAP1	FALSE
IRS4	FALSE	LIN28B	FALSE	PYCR1	FALSE	LIN28B	FALSE	PYCR1	FALSE
CDS2	FALSE	DMAC2	FALSE	COL6A1	FALSE	DMAC2	FALSE	COL6A1	FALSE
NEXN	FALSE	ACTN1	FALSE	RHOC	TRUE	ACTN1	FALSE	RHOC	TRUE
ECH1	FALSE	GPX8	FALSE	MBOAT7	TRUE	GPX8	FALSE	MBOAT7	TRUE
LIN28B	FALSE	GPRC5C	TRUE	BRD4	FALSE	GPRC5C	TRUE	BRD4	FALSE
URI1	FALSE	RIDA	FALSE	TPI1	TRUE	RIDA	FALSE	TPI1	TRUE
NUCB1	TRUE	DSP	FALSE	RNFT2	FALSE	DSP	FALSE	RNFT2	FALSE
PAK4	FALSE	MAVS	FALSE	BCAM	FALSE	MAVS	FALSE	BCAM	FALSE
DMAC2	FALSE	ETHE1	FALSE	ARMCX3	FALSE	ETHE1	FALSE	ARMCX3	FALSE
ACTN1	FALSE	OCLN	FALSE	CHCHD2	TRUE	OCLN	FALSE	CHCHD2	TRUE
GPX8	FALSE	AUH	FALSE	CHCHD2P9	FALSE	AUH	FALSE	CHCHD2P9	FALSE
GPRC5C	TRUE	LSM14A	FALSE	CPT1A	FALSE	LSM14A	FALSE	CPT1A	FALSE
RIDA	FALSE	FAM241A	FALSE	EFNB2	FALSE	FAM241A	FALSE	EFNB2	FALSE
PSMD5	FALSE	SARNP	FALSE	PRDX2	TRUE	SARNP	FALSE	PRDX2	TRUE
DSP	FALSE	NIPSNAP3A	FALSE	RANBP1	FALSE	NIPSNAP3A	FALSE	RANBP1	FALSE
MAVS	FALSE	PBXIP1	FALSE	HMOX1	FALSE	PBXIP1	FALSE	HMOX1	FALSE
ETHE1	FALSE	COQ7	FALSE	ALDOA	TRUE	COQ7	FALSE	ALDOA	TRUE
OCLN	FALSE	ACTN2	FALSE	ALDH2	FALSE	ACTN2	FALSE	ALDH2	FALSE
AUH	FALSE	HARS2	FALSE	IDH2	FALSE	HARS2	FALSE	IDH2	FALSE
LSM14A	FALSE	P4HA2	FALSE	DNAJC3	FALSE	P4HA2	FALSE	DNAJC3	FALSE
PDCD5	FALSE	KMT2B	FALSE	ANXA5	FALSE	KMT2B	FALSE	ANXA5	FALSE
FAM241A	FALSE	ZNF711	FALSE	CRLF3	FALSE	ZNF711	FALSE	CRLF3	FALSE
SARNP	FALSE	SURF1	FALSE	TMEM201	FALSE	SURF1	FALSE	TMEM201	FALSE
NIPSNAP3A	FALSE	PCK2	FALSE	LDHB	TRUE	PCK2	FALSE	LDHB	TRUE
EIF3K	TRUE	POLRMT	FALSE	UPF3B	FALSE	POLRMT	FALSE	UPF3B	FALSE
PBXIP1	FALSE	MRPS36	FALSE	CPSF6	FALSE	MRPS36	FALSE	CPSF6	FALSE
COQ7	FALSE	TIMM17A	FALSE	GFRA1	FALSE	TIMM17A	FALSE	GFRA1	FALSE
MYH9	FALSE	TMEM245	FALSE	ANXA1	FALSE	TMEM245	FALSE	ANXA1	FALSE
ACTN2	FALSE	NDUFA2	TRUE	CARS2	FALSE	NDUFA2	TRUE	CARS2	FALSE
HARS2	FALSE	RPUSD3	FALSE	PIEZO1	FALSE	RPUSD3	FALSE	PIEZO1	FALSE
P4HA2	FALSE	FAHD1	FALSE	FSCN1	FALSE	FAHD1	FALSE	FSCN1	FALSE
AHNAK	FALSE	NDUFS4	TRUE	FDXR	FALSE	NDUFS4	TRUE	FDXR	FALSE
KMT2B	FALSE	TUFM	TRUE	SLC7A5	FALSE	TUFM	TRUE	SLC7A5	FALSE
ZNF711	FALSE	MRPS34	TRUE	APLP2	TRUE	MRPS34	TRUE	APLP2	TRUE
SURF1	FALSE	MRPS17	FALSE	GAP43	FALSE	MRPS17	FALSE	GAP43	FALSE
PCK2	FALSE	NUDT19	FALSE	G6PD	FALSE	NUDT19	FALSE	G6PD	FALSE
POLRMT	FALSE	COX7A2	TRUE	CCDC8	FALSE	COX7A2	TRUE	CCDC8	FALSE
MRPS36	FALSE	SQOR	FALSE	HPRT1	FALSE	SQOR	FALSE	HPRT1	FALSE
TIMM17A	FALSE	NDUFV2	TRUE	NAA15	FALSE	NDUFV2	TRUE	NAA15	FALSE
TMEM245	FALSE	NDUFS5	TRUE	CFL2	FALSE	NDUFS5	TRUE	CFL2	FALSE
MAP7	FALSE	LMAN2	FALSE	PALM	FALSE	LMAN2	FALSE	PALM	FALSE
ATXN3	FALSE	RPRD2	FALSE	DDAH1	FALSE	RPRD2	FALSE	DDAH1	FALSE
NDUFA2	TRUE	NDUFB8	TRUE	CFL1	TRUE	NDUFB8	TRUE	CFL1	TRUE
RPUSD3	FALSE	MRPS12	TRUE	FAM171A2	FALSE	MRPS12	TRUE	FAM171A2	FALSE
FAHD1	FALSE	HEXB	FALSE	EIF5A	TRUE	HEXB	FALSE	EIF5A	TRUE
NDUFS4	TRUE	NDUFA7	TRUE	EIF5A2	FALSE	NDUFA7	TRUE	EIF5A2	FALSE
SIRT2	TRUE	MRPS27	FALSE	EIF5AL1	FALSE	MRPS27	FALSE	EIF5AL1	FALSE
TUFM	TRUE	TAMM41	FALSE	BRD3	FALSE	TAMM41	FALSE	BRD3	FALSE
MRPS34	TRUE	MRPS6	FALSE	AHCY	FALSE	MRPS6	FALSE	AHCY	FALSE
MRPS17	FALSE	MRPS14	FALSE	DACH1	FALSE	MRPS14	FALSE	DACH1	FALSE
NUDT19	FALSE	SSBP1	FALSE	IMPDH2	FALSE	SSBP1	FALSE	IMPDH2	FALSE
COX7A2	TRUE	NDUFA12	FALSE	LDHA	TRUE	NDUFA12	FALSE	LDHA	TRUE
SQOR	FALSE	REEP5	FALSE	POGLUT2	FALSE	REEP5	FALSE	POGLUT2	FALSE
NDUFV2	TRUE	STOML2	FALSE	SEPTIN11	FALSE	STOML2	FALSE	SEPTIN11	FALSE
NDUFS5	TRUE	COQ5	FALSE	ZIC2	FALSE	COQ5	FALSE	ZIC2	FALSE
LMAN2	FALSE	EARS2	FALSE	NES	FALSE	EARS2	FALSE	NES	FALSE
RPRD2	FALSE	NIN	FALSE	SEPTIN8	FALSE	NIN	FALSE	SEPTIN8	FALSE
NDUFB8	TRUE	MRPS26	FALSE	PIN1	TRUE	MRPS26	FALSE	PIN1	TRUE
MRPS12	TRUE	MRPL50	FALSE	DYSF	FALSE	MRPL50	FALSE	DYSF	FALSE
HEXB	FALSE	IDH3B	FALSE	PFN1	TRUE	IDH3B	FALSE	PFN1	TRUE
NDUFA7	TRUE	PIGO	FALSE	SALL3	FALSE	PIGO	FALSE	SALL3	FALSE
MRPS27	FALSE	PIGS	FALSE	ABCC4	FALSE	PIGS	FALSE	ABCC4	FALSE
TAMM41	FALSE	MRPS22	FALSE	AARS1	FALSE	MRPS22	FALSE	AARS1	FALSE
MRPS6	FALSE	CHCHD1	TRUE	AKR7L	FALSE	CHCHD1	TRUE	AKR7L	FALSE
MRPS14	FALSE	MRPS28	FALSE	SLC3A2	FALSE	MRPS28	FALSE		FALSE
SSBP1	FALSE	FASTKD2	FALSE	CKMT1A	FALSE	FASTKD2	FALSE		FALSE
NDUFA12	FALSE	MRPL52	FALSE	OLA1	FALSE	MRPL52	FALSE		FALSE
REEP5	FALSE	TSTD1	TRUE	POP5	FALSE	TSTD1	TRUE		FALSE
STOML2	FALSE	MRPS33	FALSE	GNB1	FALSE	MRPS33	FALSE		FALSE
COQ5	FALSE	NDUFA5	FALSE	UGGT2	FALSE	NDUFA5	FALSE		FALSE
EARS2	FALSE	NLE1	FALSE	GNAI2	TRUE	NLE1	FALSE		FALSE
COX5B	TRUE	NOA1	FALSE	MECP2	FALSE	NOA1	FALSE		FALSE
NIN	FALSE	NDUFA13	TRUE	MDH1	FALSE	NDUFA13	TRUE		FALSE
MRPS26	FALSE	MRRF	FALSE	PRAF2	TRUE	MRRF	FALSE		FALSE
NUCB2	FALSE	CCSMST1	FALSE	DSTN	FALSE	CCSMST1	FALSE		FALSE
MRPL50	FALSE	NDUFA3	FALSE	TOP1	FALSE	NDUFA3	FALSE		FALSE
IDH3B	FALSE	TRUB2	FALSE	CNP	FALSE	TRUB2	FALSE		FALSE
PIGO	FALSE	MRPS25	FALSE	SDC4	FALSE	MRPS25	FALSE		FALSE
B2M	FALSE	SIPA1L3	FALSE	RAB10	FALSE	SIPA1L3	FALSE		FALSE
PIGS	FALSE	NDUFA10	TRUE	LMNB1	FALSE	NDUFA10	TRUE		FALSE
MRPS22	FALSE	NDUFS1	FALSE	CHMP2B	FALSE	NDUFS1	FALSE		FALSE
CHCHD1	TRUE	MRPS18B	TRUE	MAP4	FALSE	MRPS18B	TRUE		FALSE
MRPS28	FALSE	PIGU	TRUE	MYOF	FALSE	PIGU	TRUE		FALSE
FASTKD2	FALSE	GLG1	FALSE	ALCAM	FALSE	GLG1	FALSE		FALSE
MRPL52	FALSE	SDHAF2	FALSE	SLIT2	FALSE	SDHAF2	FALSE		FALSE
FKBP15	FALSE	MRPS2	FALSE	GPC6	FALSE	MRPS2	FALSE		FALSE
TSTD1	TRUE	RBFA	FALSE	ARHGDIA	FALSE	RBFA	FALSE		FALSE
MRPS33	FALSE	MPC2	TRUE	ANKRD27	FALSE	MPC2	TRUE		FALSE
NDUFA5	FALSE	VPS13A	FALSE	SCARF2	FALSE	VPS13A	FALSE		FALSE
NLE1	FALSE	TBCB	FALSE	ICMT	FALSE	TBCB	FALSE		FALSE
NOA1	FALSE	CIB1	TRUE	UBTF	FALSE	CIB1	TRUE		FALSE
NDUFV3	FALSE	COX6A1	TRUE	PPA1	FALSE	COX6A1	TRUE		FALSE
NDUFA13	TRUE	GK	FALSE	ADD2	FALSE	GK	FALSE		FALSE
MRRF	FALSE	DHRS7B	FALSE	UBAC2	FALSE	DHRS7B	FALSE		FALSE
CCSMST1	FALSE	RRBP1	FALSE	PTPN1	FALSE	RRBP1	FALSE		FALSE
NDUFA3	FALSE	MTARC1	FALSE	PYCR2	FALSE	MTARC1	FALSE		FALSE
TRUB2	FALSE	TIMM22	FALSE	MAT2A	FALSE	TIMM22	FALSE		FALSE
GATC	FALSE	ERMP1	FALSE	SRRM1	FALSE	ERMP1	FALSE		FALSE
GRN	TRUE	MRPL54	TRUE	TOP1MT	FALSE	MRPL54	TRUE		FALSE
MRPS25	FALSE	TXNRD2	FALSE	MLF2	FALSE	TXNRD2	FALSE		FALSE
IRGQ	FALSE	MRPS11	TRUE	PRDX1	TRUE	MRPS11	TRUE		FALSE
SIPA1L3	FALSE	MRPS9	FALSE	LMNB2	FALSE	MRPS9	FALSE		FALSE
NDUFA10	TRUE	GCSH	FALSE	ERP29	TRUE	GCSH	FALSE		FALSE
NDUFS1	FALSE	MRPS23	TRUE	ATAD3B	TRUE	MRPS23	TRUE		FALSE
MRPS18B	TRUE	CTAGE9	FALSE	RAP2B	FALSE	CTAGE9	FALSE		FALSE
PIGU	TRUE	CTAGE4	FALSE	ATIC	FALSE	CTAGE4	FALSE		FALSE
GLG1	FALSE	CTAGE6	FALSE	DGUOK	FALSE	CTAGE6	FALSE		FALSE
ZCCHC8	FALSE	CTAGE8	FALSE	ATAD3A	FALSE	CTAGE8	FALSE		FALSE
SDHAF2	FALSE	CTAGE15	FALSE	POGLUT3	FALSE	CTAGE15	FALSE		FALSE
SIRPA	FALSE	A0A2R8YE69	FALSE	VAPB	FALSE	A0A2R8YE69	FALSE		FALSE
MRPS2	FALSE	MGRN1	FALSE	SLC1A5	FALSE	MGRN1	FALSE		FALSE
RBFA	FALSE	GNL2	FALSE	TMPO	FALSE	GNL2	FALSE		FALSE
MPC2	TRUE	GPATCH1	FALSE	SELENOK	FALSE	GPATCH1	FALSE		FALSE
VPS13A	FALSE	COQ3	FALSE	P4HB	FALSE	COQ3	FALSE		FALSE
TBCB	FALSE	ITGA1	FALSE	GNB4	FALSE	ITGA1	FALSE		FALSE
CIB1	TRUE	GK3P	FALSE	CASK	FALSE	GK3P	FALSE		FALSE
ERCC4	FALSE	CAVIN1	FALSE	RAN	TRUE	CAVIN1	FALSE		FALSE
COX6A1	TRUE	ELAC2	FALSE	NOTCH1	FALSE	ELAC2	FALSE		FALSE
ARHGEF1	FALSE	MRPL38	TRUE	ATAD3C	FALSE	MRPL38	TRUE		FALSE
GK	FALSE	ZSWIM8	FALSE	ATP1B3	FALSE	ZSWIM8	FALSE		FALSE
DHRS7B	FALSE	MRPL13	FALSE	TMEM109	FALSE	MRPL13	FALSE		FALSE
RRBP1	FALSE	ITGA3	FALSE	PHC2	FALSE	ITGA3	FALSE		FALSE
MTARC1	FALSE	SLC2A1	FALSE	EPHX1	TRUE	SLC2A1	FALSE		FALSE
TIMM22	FALSE	TIMM29	FALSE	PHF6	FALSE	TIMM29	FALSE		FALSE
ERMP1	FALSE	PIGT	TRUE	RBM15B	FALSE	PIGT	TRUE		FALSE
MRPL54	TRUE	MIPEP	FALSE	AKR7A2	FALSE	MIPEP	FALSE		FALSE
TXNRD2	FALSE	NFU1	FALSE	GUK1	FALSE	NFU1	FALSE		FALSE
MRPS11	TRUE	LZTS2	FALSE	DLG1	FALSE	LZTS2	FALSE		FALSE
MRPS9	FALSE	MRPL12	TRUE	RP2	FALSE	MRPL12	TRUE		FALSE
GCSH	FALSE	MPC1	FALSE	SLC25A10	FALSE	MPC1	FALSE		FALSE
CCDC126	FALSE	MRPL39	FALSE	TMCC3	FALSE	MRPL39	FALSE		FALSE
MRPS23	TRUE	CCN1	FALSE	HSP90B1	FALSE	CCN1	FALSE		FALSE
CTAGE9	FALSE	CCDC86	FALSE	PLOD1	TRUE	CCDC86	FALSE		FALSE
CTAGE4	FALSE	CDK5RAP1	FALSE	ZNF592	FALSE	CDK5RAP1	FALSE		FALSE
CTAGE6	FALSE	NDUFB9	TRUE	SLC25A22	FALSE	NDUFB9	TRUE		FALSE
CTAGE8	FALSE	OXA1L	FALSE	STRN	FALSE	OXA1L	FALSE		FALSE
CTAGE15	FALSE	HLA-H	FALSE	SLC2A3	FALSE	HLA-H	FALSE		FALSE
A0A2R8YE69	FALSE	DLST	FALSE	EI24	FALSE	DLST	FALSE		FALSE
MGRN1	FALSE	MRPS5	TRUE	TMCO3	FALSE	MRPS5	TRUE		FALSE
GNL2	FALSE	NDUFC2-KCTD14	TRUE	ZBTB33	FALSE	NDUFC2-KCTD14	TRUE		FALSE
CD46	FALSE	MRPL41	TRUE	EZH2	FALSE	MRPL41	TRUE		FALSE
GPATCH1	FALSE	MGME1	FALSE	TTYH3	TRUE	MGME1	FALSE		FALSE
COQ3	FALSE	PLGRKT	FALSE	HYOU1	FALSE		FALSE		FALSE
SFT2D3	FALSE	NDUFA6	TRUE	SLC16A1	FALSE		FALSE		FALSE
NDUFAB1	FALSE	NDUFV1	TRUE	ISG20L2	FALSE		FALSE		FALSE
OS9	FALSE	NDUFC2	TRUE	INSR	FALSE		FALSE		FALSE
ITGA1	FALSE	MRPL27	FALSE	RAB7A	FALSE		FALSE		FALSE
GK3P	FALSE	TASOR2	FALSE	SLC2A14	FALSE		FALSE		FALSE
RNF126	FALSE	ITGA2	FALSE	ARID3B	FALSE		FALSE		FALSE
RNF126	FALSE	HACL1	FALSE	PRDM2	FALSE		FALSE		FALSE
CAVIN1	FALSE	PIGK	FALSE	ADD3	FALSE		FALSE		FALSE
ELAC2	FALSE	NUBPL	FALSE	ELAVL2	FALSE		FALSE		FALSE
UQCRB	FALSE	ALG5	FALSE	ELAVL4	FALSE		FALSE		FALSE
MRPL38	TRUE	QRSL1	FALSE	CHAMP1	FALSE		FALSE		FALSE
ZSWIM8	FALSE	COQ9	FALSE	UTP23	FALSE		FALSE		FALSE
MRPL13	FALSE	TJP1	FALSE	ATP6V0A1	FALSE		FALSE		FALSE
ITGA3	FALSE	PKP4	FALSE	HACD3	FALSE		FALSE		FALSE
ARPC1A	FALSE	MIA2	FALSE	FARP1	FALSE		FALSE		FALSE
SLC2A1	FALSE	SLC27A4	FALSE	NFIC	FALSE		FALSE		FALSE
TIMM29	FALSE	SCO1	FALSE	TFCP2	FALSE		FALSE		FALSE
PIGT	TRUE	MRPS7	FALSE	TMCO1	FALSE		FALSE		FALSE
MIPEP	FALSE	ISCA1	FALSE	HSP90B2P	FALSE		FALSE		FALSE
NFU1	FALSE	GADD45GIP1	TRUE	EEPD1	FALSE		FALSE		FALSE
LZTS2	FALSE	MRPL49	FALSE	RBBP4	FALSE		FALSE		FALSE
MRPL12	TRUE	SDHAF3	FALSE	ETFDH	FALSE		FALSE		FALSE
MPC1	FALSE	MRPL4	TRUE	LMF2	FALSE		FALSE		FALSE
MRPL39	FALSE	TMX2	FALSE	ITPRIP	FALSE		FALSE		FALSE
CCN1	FALSE	MRPL32	FALSE	RAP1A	FALSE		FALSE		FALSE
CCDC86	FALSE	NDUFB7	FALSE	NKRF	FALSE		FALSE		FALSE
CDK5RAP1	FALSE	MRPL2	FALSE	ADD1	FALSE		FALSE		FALSE
NDUFB9	TRUE	RARS2	FALSE	GNB2	TRUE		FALSE		FALSE
OXA1L	FALSE	MRPL58	FALSE	YTHDC1	FALSE		FALSE		FALSE
HLA-H	FALSE	NDUFB6	FALSE	CBX8	FALSE		FALSE		FALSE
DLST	FALSE	NDUFB4	TRUE	PACSIN3	FALSE		FALSE		FALSE
NAGLU	FALSE	THOC1	FALSE	NONO	FALSE		FALSE		FALSE
MRPS5	TRUE	MRPL57	FALSE	ZNF512B	FALSE		FALSE		FALSE
TTF2	FALSE	MRPL40	TRUE	CKMT2	FALSE		FALSE		FALSE
NDUFC2-KCTD14	TRUE	P3H2	FALSE	XXYLT1	TRUE		FALSE		FALSE
VPS4B	FALSE	MRPS18A	TRUE	EMD	TRUE		FALSE		FALSE
MRPL41	TRUE	MRPL48	FALSE	PA2G4	FALSE		FALSE		FALSE
TIMM13	TRUE	MRPL22	TRUE	ANK3	FALSE		FALSE		FALSE
SCAMP1	FALSE	MRPS30	FALSE	SLC12A2	FALSE		FALSE		FALSE
MGME1	FALSE	H1-0	FALSE	RETSAT	FALSE		FALSE		FALSE
SEC16A	FALSE	MRPL14	TRUE	ZNF280C	FALSE		FALSE		FALSE
CC2D1A	FALSE	UQCC2	TRUE	SLC4A7	FALSE		FALSE		FALSE
PLGRKT	FALSE	CCDC127	FALSE	COL4A1	FALSE		FALSE		FALSE
NDUFA6	TRUE	COX20	FALSE	CENPV	FALSE		FALSE		FALSE
NDUFV1	TRUE	BCKDHA	FALSE	TXNRD1	FALSE		FALSE		FALSE
NDUFC2	TRUE	MRPS21	FALSE	ADNP	FALSE		FALSE		FALSE
MYH11	FALSE	TOR1AIP1	FALSE	FKBP11	FALSE		FALSE		FALSE
MRPL27	FALSE	GLRX5	FALSE	ING5	FALSE		FALSE		FALSE
TASOR2	FALSE	MBLAC2	FALSE	CTDSPL2	FALSE		FALSE		FALSE
ITGA2	FALSE	MRM3	FALSE	ZNF280D	FALSE		FALSE		FALSE
HACL1	FALSE	MRPS10	FALSE	AP2A2	FALSE		FALSE		FALSE
GOLM1	FALSE	ZCCHC7	FALSE	AP2S1	TRUE		FALSE		FALSE
PIGK	FALSE	PDF	FALSE	ATP4A	FALSE		FALSE		FALSE
NUBPL	FALSE	MRM1	FALSE	ATP1A2	FALSE		FALSE		FALSE
ALG5	FALSE	TBRG4	FALSE	PRDX4	TRUE		FALSE		FALSE
QRSL1	FALSE	TIMM23	FALSE	POLR1B	FALSE		FALSE		FALSE
COQ9	FALSE	TIMM23B	FALSE	CCDC134	FALSE		FALSE		FALSE
TJP1	FALSE	DNAJC1	FALSE	ATP1A3	FALSE		FALSE		FALSE
PKP4	FALSE	GEMIN5	FALSE	ATP12A	FALSE		FALSE		FALSE
MIA2	FALSE	MRPL55	FALSE	SALL1	FALSE		FALSE		FALSE
SLC27A4	FALSE	NDUFS8	TRUE	PNPLA6	FALSE		FALSE		FALSE
SMPDL3B	FALSE	COMTD1	FALSE	PUF60	TRUE		FALSE		FALSE
SCO1	FALSE	MRPL28	TRUE	RBM14	FALSE		FALSE		FALSE
ANKRD46	FALSE	MAN2A1	FALSE	LBR	FALSE		FALSE		FALSE
MRPS7	FALSE	UQCRFS1P1	FALSE	SEC61A1	FALSE		FALSE		FALSE
KDM3B	FALSE	NDUFA9	TRUE	CELSR2	FALSE		FALSE		FALSE
ISCA1	FALSE	VWA8	FALSE	AP2M1	TRUE		FALSE		FALSE
GADD45GIP1	TRUE	MRPL17	FALSE	SEC61A2	FALSE		FALSE		FALSE
MRPL49	FALSE	UQCRFS1	TRUE	SRPRA	FALSE		FALSE		FALSE
SDHAF3	FALSE	MRPS16	FALSE	ATP11C	FALSE		FALSE		FALSE
MRPL4	TRUE	MRPL44	FALSE	LPCAT1	FALSE		FALSE		FALSE
NEU1	FALSE	RAB9A	FALSE	NT5DC2	FALSE		FALSE		FALSE
TMX2	FALSE	MRPS35	FALSE	NSD2	FALSE		FALSE		FALSE
MRPL32	FALSE	ISCU	FALSE	ZNF512	FALSE		FALSE		FALSE
NDUFB7	FALSE	MRPL15	FALSE	NUP50	FALSE		FALSE		FALSE
MRPL2	FALSE	NDUFS2	FALSE	RAP1B	FALSE		FALSE		FALSE
RARS2	FALSE	LYRM2	FALSE	ATP1A4	FALSE		FALSE		FALSE
MYL12A	TRUE	DDRGK1	TRUE	C2CD2L	FALSE		FALSE		FALSE
MYL12B	TRUE	SGPL1	FALSE	DKC1	FALSE		FALSE		FALSE
MRPL58	FALSE	NDUFS7	TRUE	ATP1A1	FALSE		FALSE		FALSE
NDUFB6	FALSE	THOC7	FALSE	RCC1	FALSE		FALSE		FALSE
NDUFB4	TRUE	KIF2A	FALSE	MEAF6	FALSE		FALSE		FALSE
MAST4	FALSE	MRPL47	FALSE	GJA1	FALSE		FALSE		FALSE
SUB1	TRUE	WDR48	FALSE	HSD17B12	FALSE		FALSE		FALSE
THOC1	FALSE	ARPC5L	FALSE	LRIF1	FALSE		FALSE		FALSE
MRPL57	FALSE	NDUFS3	FALSE	A6NIZ1	FALSE		FALSE		FALSE
OSTM1	FALSE	MCEE	FALSE	SLC25A6	FALSE		FALSE		FALSE
MRPL40	TRUE	MRPL51	TRUE	CBX5	FALSE		FALSE		FALSE
UNC119B	FALSE	MTHFD1L	FALSE	JPH1	FALSE		FALSE		FALSE
P3H2	FALSE	MRPL33	FALSE	KRR1	FALSE		FALSE		FALSE
NUBP2	TRUE	GOLGA3	FALSE	PDIA6	FALSE		FALSE		FALSE
MRPS18A	TRUE	CXADR	FALSE	RABL3	FALSE		FALSE		FALSE
MRPL48	FALSE	TMED10	FALSE	PDS5B	FALSE		FALSE		FALSE
MRPL22	TRUE	PIGBOS1	FALSE	POLR1E	FALSE		FALSE		FALSE
MRPS30	FALSE	DDX28	FALSE	ZNF384	FALSE		FALSE		FALSE
H1-0	FALSE	MRPL43	TRUE	SLTM	FALSE		FALSE		FALSE
MRPL14	TRUE	MRPS15	FALSE	PBRM1	FALSE		FALSE		FALSE
UQCC2	TRUE	ACTR3	FALSE	POLR1A	FALSE		FALSE		FALSE
CCDC127	FALSE	TMED7	FALSE	RDH14	FALSE		FALSE		FALSE
COX20	FALSE	KIAA0100	FALSE	SUZ12	FALSE		FALSE		FALSE
BCKDHA	FALSE	NOP53	FALSE		FALSE		FALSE		FALSE
MRPS21	FALSE	MAN1A1	FALSE		FALSE		FALSE		FALSE
TOR1AIP1	FALSE	PDPR	FALSE		FALSE		FALSE		FALSE
GLRX5	FALSE	MRPS31	FALSE		FALSE		FALSE		FALSE
MBLAC2	FALSE	DAP3	FALSE		FALSE		FALSE		FALSE
MRM3	FALSE	OVCA2	FALSE		FALSE		FALSE		FALSE
IPO4	FALSE	CTAGE1	FALSE		FALSE		FALSE		FALSE
MYL9	FALSE	UQCRC2	FALSE		FALSE		FALSE		FALSE
COX5A	TRUE	TFB2M	FALSE		FALSE		FALSE		FALSE
MRPS10	FALSE	TRAP1	TRUE		FALSE		FALSE		FALSE
ZCCHC7	FALSE	EPHA7	FALSE		FALSE		FALSE		FALSE
UQCRH	TRUE	SLC27A2	FALSE		FALSE		FALSE		FALSE
PDF	FALSE	COX6C	TRUE		FALSE		FALSE		FALSE
NSFL1C	FALSE	MAFK	FALSE		FALSE		FALSE		FALSE
VAMP8	TRUE	MAFG	FALSE		FALSE		FALSE		FALSE
KANSL3	FALSE	TFB1M	FALSE		FALSE		FALSE		FALSE
GMFB	FALSE	MRPL23	TRUE		FALSE		FALSE		FALSE
MRM1	FALSE	UBE2J1	FALSE		FALSE		FALSE		FALSE
TPM1	FALSE	MT-CO2	FALSE		FALSE		FALSE		FALSE
TBRG4	FALSE	AK2	FALSE		FALSE		FALSE		FALSE
TIMM23	FALSE	DUT	FALSE		FALSE		FALSE		FALSE
TIMM23B	FALSE	COA3	TRUE		FALSE		FALSE		FALSE
SARS1	FALSE	COX16	FALSE		FALSE		FALSE		FALSE
DNAJC1	FALSE	ERP44	FALSE		FALSE		FALSE		FALSE
GEMIN5	FALSE	MRPL24	TRUE		FALSE		FALSE		FALSE
MRPL55	FALSE	CARD19	FALSE		FALSE		FALSE		FALSE
SETD3	FALSE	TRNT1	FALSE		FALSE		FALSE		FALSE
NCBP2AS2	FALSE	MRPL11	FALSE		FALSE		FALSE		FALSE
NDUFS8	TRUE	EXD2	FALSE		FALSE		FALSE		FALSE
TPBG	FALSE	ARPC4	FALSE		FALSE		FALSE		FALSE
COMTD1	FALSE	MRPL46	TRUE		FALSE		FALSE		FALSE
FERMT2	FALSE	KIF14	FALSE		FALSE		FALSE		FALSE
MRPL28	TRUE	RMDN3	FALSE		FALSE		FALSE		FALSE
MAN2A1	FALSE	QSOX2	FALSE		FALSE		FALSE		FALSE
SLC16A10	FALSE	MRPL53	FALSE		FALSE		FALSE		FALSE
UQCRFS1P1	FALSE	NSUN4	FALSE		FALSE		FALSE		FALSE
NDUFA9	TRUE	TM9SF4	FALSE		FALSE		FALSE		FALSE
VWA8	FALSE	COMT	TRUE		FALSE		FALSE		FALSE
MRPL17	FALSE	DLD	FALSE		FALSE		FALSE		FALSE
MIA3	FALSE	DNAJA3	FALSE		FALSE		FALSE		FALSE
UQCRFS1	TRUE	FXN	FALSE		FALSE		FALSE		FALSE
MRPS16	FALSE	ERGIC3	FALSE		FALSE		FALSE		FALSE
MRPL44	FALSE	PDHA1	FALSE		FALSE		FALSE		FALSE
RAB9A	FALSE	ECI2	FALSE		FALSE		FALSE		FALSE
MRPS35	FALSE	SDHA	TRUE		FALSE		FALSE		FALSE
ISCU	FALSE	DNAJB12	FALSE		FALSE		FALSE		FALSE
MRPL15	FALSE	SUPV3L1	FALSE		FALSE		FALSE		FALSE
NDUFS2	FALSE	MFN1	FALSE		FALSE		FALSE		FALSE
LYRM2	FALSE	UQCRC1	TRUE		FALSE		FALSE		FALSE
DDRGK1	TRUE	GLDC	FALSE		FALSE		FALSE		FALSE
SGPL1	FALSE	GTPBP10	FALSE		FALSE		FALSE		FALSE
NDUFS7	TRUE	SDHB	FALSE		FALSE		FALSE		FALSE
ZFYVE16	FALSE	DSG2	FALSE		FALSE		FALSE		FALSE
THOC7	FALSE	PTCD3	FALSE		FALSE		FALSE		FALSE
PSME2	FALSE	PTGES2	FALSE		FALSE		FALSE		FALSE
KIF2A	FALSE	MRPL18	FALSE		FALSE		FALSE		FALSE
MRPL47	FALSE	CLPTM1L	FALSE		FALSE		FALSE		FALSE
WDR48	FALSE	PTCD1	FALSE		FALSE		FALSE		FALSE
ARPC5L	FALSE	ATP5PD	FALSE		FALSE		FALSE		FALSE
NDUFS3	FALSE	GRPEL2	FALSE		FALSE		FALSE		FALSE
UQCR10	TRUE	GFM2	FALSE		FALSE		FALSE		FALSE
MCEE	FALSE	MRPL42	FALSE		FALSE		FALSE		FALSE
MRPL51	TRUE	RHOB	FALSE		FALSE		FALSE		FALSE
MTHFD1L	FALSE	HAGH	FALSE		FALSE		FALSE		FALSE
MRPL33	FALSE	ERAL1	FALSE		FALSE		FALSE		FALSE
NDUFB3	TRUE	MTCH1	FALSE		FALSE		FALSE		FALSE
GOLGA3	FALSE	FNDC3A	FALSE		FALSE		FALSE		FALSE
CXADR	FALSE	ERBIN	FALSE		FALSE		FALSE		FALSE
GAPVD1	FALSE	SMIM20	FALSE		FALSE		FALSE		FALSE
UACA	FALSE	MRPL45	FALSE		FALSE		FALSE		FALSE
TMED10	FALSE	SCFD1	FALSE		FALSE		FALSE		FALSE
PIGBOS1	FALSE	PMPCB	FALSE		FALSE		FALSE		FALSE
DDX28	FALSE	MRPL20	FALSE		FALSE		FALSE		FALSE
MRPL43	TRUE	CDKAL1	FALSE		FALSE		FALSE		FALSE
MRPS15	FALSE	MTERF4	FALSE		FALSE		FALSE		FALSE
ACTR3	FALSE	FOXRED1	FALSE		FALSE		FALSE		FALSE
TMED7	FALSE	MAFF	FALSE		FALSE		FALSE		FALSE
KIAA0100	FALSE	AARS2	FALSE		FALSE		FALSE		FALSE
NOP53	FALSE	TWNK	FALSE		FALSE		FALSE		FALSE
MAN1A1	FALSE	HSDL2	FALSE		FALSE		FALSE		FALSE
PDPR	FALSE	MUL1	FALSE		FALSE		FALSE		FALSE
NUF2	FALSE	AURKAIP1	TRUE		FALSE		FALSE		FALSE
MRPS31	FALSE	HSPE1	FALSE		FALSE		FALSE		FALSE
DAP3	FALSE	TYSND1	FALSE		FALSE		FALSE		FALSE
OVCA2	FALSE	ACTR3B	FALSE		FALSE		FALSE		FALSE
RTN4IP1	FALSE	FYN	FALSE		FALSE		FALSE		FALSE
CTAGE1	FALSE	ICE1	FALSE		FALSE		FALSE		FALSE
WASHC2C	FALSE	COX4I1	TRUE		FALSE		FALSE		FALSE
WASHC2A	FALSE	TOR1B	FALSE		FALSE		FALSE		FALSE
UQCRC2	FALSE	HCCS	FALSE		FALSE		FALSE		FALSE
TFB2M	FALSE	C1QBP	TRUE		FALSE		FALSE		FALSE
TRAP1	TRUE	APMAP	TRUE		FALSE		FALSE		FALSE
EPHA7	FALSE	TIMMDC1	FALSE		FALSE		FALSE		FALSE
CALD1	FALSE	NSA2	FALSE		FALSE		FALSE		FALSE
SLC27A2	FALSE	GRHPR	FALSE		FALSE		FALSE		FALSE
CSNK1A1	FALSE	MIS18BP1	FALSE		FALSE		FALSE		FALSE
PLEC	FALSE	LSS	FALSE		FALSE		FALSE		FALSE
CYB5B	FALSE	TSFM	FALSE		FALSE		FALSE		FALSE
COX6C	TRUE	TIMM21	FALSE		FALSE		FALSE		FALSE
CABLES1	FALSE	THOC5	FALSE		FALSE		FALSE		FALSE
MAFK	FALSE	MPST	FALSE		FALSE		FALSE		FALSE
TPM4	FALSE	ALDH6A1	FALSE		FALSE		FALSE		FALSE
DSC2	FALSE	CSNK2A3	FALSE		FALSE		FALSE		FALSE
MAFG	FALSE	MAP7D3	FALSE		FALSE		FALSE		FALSE
TFB1M	FALSE	ZMYND11	FALSE		FALSE		FALSE		FALSE
MRPL23	TRUE	CYP51A1	FALSE		FALSE		FALSE		FALSE
PLS3	FALSE	YES1	FALSE		FALSE		FALSE		FALSE
HMGA2	FALSE	PNPT1	FALSE		FALSE		FALSE		FALSE
UBE2J1	FALSE	PTPRK	FALSE		FALSE		FALSE		FALSE
DIAPH3	FALSE	PET100	TRUE		FALSE		FALSE		FALSE
MT-CO2	FALSE	ABHD16A	FALSE		FALSE		FALSE		FALSE
NDUFA4	TRUE	NDUFAF3	FALSE		FALSE		FALSE		FALSE
AK2	FALSE	TPX2	FALSE		FALSE		FALSE		FALSE
COX7C	TRUE	DHRS4	FALSE		FALSE		FALSE		FALSE
SORT1	FALSE	P4HA1	FALSE		FALSE		FALSE		FALSE
DUT	FALSE	UQCRQ	TRUE		FALSE		FALSE		FALSE
COA3	TRUE	GRPEL1	FALSE		FALSE		FALSE		FALSE
DHX58	FALSE	CSNK2A1	FALSE		FALSE		FALSE		FALSE
COX16	FALSE	NDUFB5	FALSE		FALSE		FALSE		FALSE
SUMF2	FALSE	GPAA1	FALSE		FALSE		FALSE		FALSE
ERP44	FALSE	PTRH2	FALSE		FALSE		FALSE		FALSE
MRPL24	TRUE	EXOSC6	FALSE		FALSE		FALSE		FALSE
CARD19	FALSE	TOR1AIP2	FALSE		FALSE		FALSE		FALSE
CTNNAL1	FALSE	TIMM17B	TRUE		FALSE		FALSE		FALSE
MAPK1	FALSE	NDUFAF4	FALSE		FALSE		FALSE		FALSE
ULBP3	FALSE	RDH11	FALSE		FALSE		FALSE		FALSE
TRNT1	FALSE	THOC3	FALSE		FALSE		FALSE		FALSE
TPM2	FALSE	ACSL4	FALSE		FALSE		FALSE		FALSE
MRPL11	FALSE	METTL15	FALSE		FALSE		FALSE		FALSE
EXD2	FALSE	MRPL3	FALSE		FALSE		FALSE		FALSE
ARPC4	FALSE	YME1L1	FALSE		FALSE		FALSE		FALSE
MYH14	FALSE	GALNT2	FALSE		FALSE		FALSE		FALSE
CIAO2B	FALSE	SFXN3	FALSE		FALSE		FALSE		FALSE
BICD2	FALSE	MYO19	FALSE		FALSE		FALSE		FALSE
MRPL46	TRUE	VKORC1L1	FALSE		FALSE		FALSE		FALSE
KIF14	FALSE	NNT	FALSE		FALSE		FALSE		FALSE
APOC3	FALSE	AGPAT5	FALSE		FALSE		FALSE		FALSE
RMDN3	FALSE	EMC2	FALSE		FALSE		FALSE		FALSE
DBN1	TRUE	SEL1L	FALSE		FALSE		FALSE		FALSE
QSOX2	FALSE	MOGS	FALSE		FALSE		FALSE		FALSE
YTHDC2	FALSE	GPD2	FALSE		FALSE		FALSE		FALSE
MRPL19	FALSE	MTIF2	FALSE		FALSE		FALSE		FALSE
MRPL53	FALSE	SIRT5	FALSE		FALSE		FALSE		FALSE
NSUN4	FALSE	TOMM20	FALSE		FALSE		FALSE		FALSE
NDC80	FALSE	SPTLC2	FALSE		FALSE		FALSE		FALSE
UQCRHL	FALSE	EMC3	FALSE		FALSE		FALSE		FALSE
TM9SF4	FALSE	ELMOD2	FALSE		FALSE		FALSE		FALSE
COMT	TRUE	PARN	FALSE		FALSE		FALSE		FALSE
HSPA13	FALSE	COQ8A	FALSE		FALSE		FALSE		FALSE
TOMM7	TRUE	MRPL37	TRUE		FALSE		FALSE		FALSE
ATRAID	TRUE	FECH	FALSE		FALSE		FALSE		FALSE
DLD	FALSE	POLDIP2	FALSE		FALSE		FALSE		FALSE
DNAJA3	FALSE	RRS1	FALSE		FALSE		FALSE		FALSE
FXN	FALSE	AKAP1	FALSE		FALSE		FALSE		FALSE
ERGIC3	FALSE	PELP1	FALSE		FALSE		FALSE		FALSE
PDHA1	FALSE	MTREX	FALSE		FALSE		FALSE		FALSE
PAFAH1B3	TRUE	SIRT3	FALSE		FALSE		FALSE		FALSE
CYCS	FALSE	ATP5ME	FALSE		FALSE		FALSE		FALSE
ECI2	FALSE	PON2	FALSE		FALSE		FALSE		FALSE
SDHA	TRUE	AK4	FALSE		FALSE		FALSE		FALSE
NDUFB10	TRUE	ATP5MGL	FALSE		FALSE		FALSE		FALSE
CARMIL1	FALSE	ABHD12	FALSE		FALSE		FALSE		FALSE
DNAJB12	FALSE	HSD17B8	FALSE		FALSE		FALSE		FALSE
SUPV3L1	FALSE	EMC7	FALSE		FALSE		FALSE		FALSE
C19orf25	FALSE	MTX3	FALSE		FALSE		FALSE		FALSE
MFN1	FALSE	ARG2	FALSE		FALSE		FALSE		FALSE
UQCRC1	TRUE	KIF22	FALSE		FALSE		FALSE		FALSE
GLDC	FALSE	PKP2	FALSE		FALSE		FALSE		FALSE
CCDC88C	FALSE	EXOSC4	FALSE		FALSE		FALSE		FALSE
GOLGA5	FALSE	ARV1	FALSE		FALSE		FALSE		FALSE
RPA3	FALSE	ABCB4	FALSE		FALSE		FALSE		FALSE
TOMM5	FALSE	TMEM43	FALSE		FALSE		FALSE		FALSE
GTPBP10	FALSE	ALG2	FALSE		FALSE		FALSE		FALSE
TMED1	TRUE	ITPR3	FALSE		FALSE		FALSE		FALSE
TTK	FALSE	NOP16	FALSE		FALSE		FALSE		FALSE
MRPL16	FALSE	CENPB	FALSE		FALSE		FALSE		FALSE
SDHB	FALSE	RRP12	FALSE		FALSE		FALSE		FALSE
DSG2	FALSE	SFXN1	FALSE		FALSE		FALSE		FALSE
UQCC1	FALSE	KDSR	FALSE		FALSE		FALSE		FALSE
KIAA0319L	FALSE	RIOX1	FALSE		FALSE		FALSE		FALSE
PLA2G4D	FALSE	UFSP2	FALSE		FALSE		FALSE		FALSE
PTCD3	FALSE	PCNA	FALSE		FALSE		FALSE		FALSE
PTGES2	FALSE	DDX51	FALSE		FALSE		FALSE		FALSE
MRPL18	FALSE	DERL2	FALSE		FALSE		FALSE		FALSE
ITGB1	FALSE	MRE11	FALSE		FALSE		FALSE		FALSE
TRIP11	FALSE	SFXN4	FALSE		FALSE		FALSE		FALSE
CLPTM1L	FALSE	MRTO4	FALSE		FALSE		FALSE		FALSE
PTCD1	FALSE	MICOS13	FALSE		FALSE		FALSE		FALSE
TOMM22	TRUE	MARCHF5	FALSE		FALSE		FALSE		FALSE
ATP5PD	FALSE	COX15	FALSE		FALSE		FALSE		FALSE
LAMC1	FALSE	RPF2	FALSE		FALSE		FALSE		FALSE
GRPEL2	FALSE	SLC25A13	FALSE		FALSE		FALSE		FALSE
TMUB1	FALSE	AFG3L2	FALSE		FALSE		FALSE		FALSE
GFM2	FALSE	EXOSC3	FALSE		FALSE		FALSE		FALSE
MRPL42	FALSE	TOR1A	FALSE		FALSE		FALSE		FALSE
TPD52	FALSE	CEMIP2	FALSE		FALSE		FALSE		FALSE
RHOB	FALSE	ARPC5	FALSE		FALSE		FALSE		FALSE
FANCI	FALSE	SLC25A12	FALSE		FALSE		FALSE		FALSE
APP	FALSE	MBD2	FALSE		FALSE		FALSE		FALSE
SLC20A1	FALSE	JAK1	FALSE		FALSE		FALSE		FALSE
HAGH	FALSE	GARS1	FALSE		FALSE		FALSE		FALSE
COA7	FALSE	RAD50	FALSE		FALSE		FALSE		FALSE
ERAL1	FALSE	TMEM160	TRUE		FALSE		FALSE		FALSE
PAM16	TRUE	EMC8	FALSE		FALSE		FALSE		FALSE
MTCH1	FALSE	EXOSC8	FALSE		FALSE		FALSE		FALSE
FNDC3A	FALSE		FALSE		FALSE		FALSE		FALSE
ERBIN	FALSE		FALSE		FALSE		FALSE		FALSE
SMIM20	FALSE		FALSE		FALSE		FALSE		FALSE
MRPL45	FALSE		FALSE		FALSE		FALSE		FALSE
PCM1	FALSE		FALSE		FALSE		FALSE		FALSE
SCFD1	FALSE		FALSE		FALSE		FALSE		FALSE
CDIPT	FALSE		FALSE		FALSE		FALSE		FALSE
PDHA2	FALSE		FALSE		FALSE		FALSE		FALSE
PMPCB	FALSE		FALSE		FALSE		FALSE		FALSE
TTC17	FALSE		FALSE		FALSE		FALSE		FALSE
MRPL20	FALSE		FALSE		FALSE		FALSE		FALSE
TOMM6	TRUE		FALSE		FALSE		FALSE		FALSE
ERLEC1	FALSE		FALSE		FALSE		FALSE		FALSE
CDKAL1	FALSE		FALSE		FALSE		FALSE		FALSE
OGDH	FALSE		FALSE		FALSE		FALSE		FALSE
MPHOSPH6	FALSE		FALSE		FALSE		FALSE		FALSE
MTERF4	FALSE		FALSE		FALSE		FALSE		FALSE
FOXRED1	FALSE		FALSE		FALSE		FALSE		FALSE
MAFF	FALSE		FALSE		FALSE		FALSE		FALSE
AARS2	FALSE		FALSE		FALSE		FALSE		FALSE
TWNK	FALSE		FALSE		FALSE		FALSE		FALSE
WDR83	FALSE		FALSE		FALSE		FALSE		FALSE
HSDL2	FALSE		FALSE		FALSE		FALSE		FALSE
MUL1	FALSE		FALSE		FALSE		FALSE		FALSE
AURKAIP1	TRUE		FALSE		FALSE		FALSE		FALSE
CNPY2	FALSE		FALSE		FALSE		FALSE		FALSE
THOC6	FALSE		FALSE		FALSE		FALSE		FALSE
HSPE1	FALSE		FALSE		FALSE		FALSE		FALSE
TYSND1	FALSE		FALSE		FALSE		FALSE		FALSE
ACTR3B	FALSE		FALSE		FALSE		FALSE		FALSE
TMED9	TRUE		FALSE		FALSE		FALSE		FALSE
CD44	FALSE		FALSE		FALSE		FALSE		FALSE
FYN	FALSE		FALSE		FALSE		FALSE		FALSE
SPECC1	FALSE		FALSE		FALSE		FALSE		FALSE
ICE1	FALSE		FALSE		FALSE		FALSE		FALSE
COX4I1	TRUE		FALSE		FALSE		FALSE		FALSE
TOR1B	FALSE		FALSE		FALSE		FALSE		FALSE
ACOT13	FALSE		FALSE		FALSE		FALSE		FALSE
COA1	FALSE		FALSE		FALSE		FALSE		FALSE
TNKS1BP1	FALSE		FALSE		FALSE		FALSE		FALSE
HCCS	FALSE		FALSE		FALSE		FALSE		FALSE
GOLGA2	FALSE		FALSE		FALSE		FALSE		FALSE
C1QBP	TRUE		FALSE		FALSE		FALSE		FALSE
LRRC7	FALSE		FALSE		FALSE		FALSE		FALSE
OGDHL	FALSE		FALSE		FALSE		FALSE		FALSE
DARS2	FALSE		FALSE		FALSE		FALSE		FALSE
APMAP	TRUE		FALSE		FALSE		FALSE		FALSE
RPLP2	TRUE		FALSE		FALSE		FALSE		FALSE
TIMMDC1	FALSE		FALSE		FALSE		FALSE		FALSE
NSA2	FALSE		FALSE		FALSE		FALSE		FALSE
KIF20A	FALSE		FALSE		FALSE		FALSE		FALSE
GRHPR	FALSE		FALSE		FALSE		FALSE		FALSE
PFDN4	FALSE		FALSE		FALSE		FALSE		FALSE
MIS18BP1	FALSE		FALSE		FALSE		FALSE		FALSE
LSS	FALSE		FALSE		FALSE		FALSE		FALSE
ATP5F1D	FALSE		FALSE		FALSE		FALSE		FALSE
MCL1	FALSE		FALSE		FALSE		FALSE		FALSE
MRPL9	FALSE		FALSE		FALSE		FALSE		FALSE
NPTN	FALSE		FALSE		FALSE		FALSE		FALSE
TSFM	FALSE		FALSE		FALSE		FALSE		FALSE
TIMM21	FALSE		FALSE		FALSE		FALSE		FALSE
THOC5	FALSE		FALSE		FALSE		FALSE		FALSE
HAUS7	FALSE		FALSE		FALSE		FALSE		FALSE
MPST	FALSE		FALSE		FALSE		FALSE		FALSE
CRELD1	FALSE		FALSE		FALSE		FALSE		FALSE
ALDH6A1	FALSE		FALSE		FALSE		FALSE		FALSE
CSNK2A3	FALSE		FALSE		FALSE		FALSE		FALSE
USF2	FALSE		FALSE		FALSE		FALSE		FALSE
EMC10	TRUE		FALSE		FALSE		FALSE		FALSE
FN1	FALSE		FALSE		FALSE		FALSE		FALSE
MAP7D3	FALSE		FALSE		FALSE		FALSE		FALSE
ZMYND11	FALSE		FALSE		FALSE		FALSE		FALSE
HAUS8	FALSE		FALSE		FALSE		FALSE		FALSE
CYP51A1	FALSE		FALSE		FALSE		FALSE		FALSE
CCNB1	FALSE		FALSE		FALSE		FALSE		FALSE
YES1	FALSE		FALSE		FALSE		FALSE		FALSE
PNPT1	FALSE		FALSE		FALSE		FALSE		FALSE
PTPRK	FALSE		FALSE		FALSE		FALSE		FALSE
ZC3H8	FALSE		FALSE		FALSE		FALSE		FALSE
MRPL10	FALSE		FALSE		FALSE		FALSE		FALSE
MARS2	FALSE		FALSE		FALSE		FALSE		FALSE
USP54	FALSE		FALSE		FALSE		FALSE		FALSE
PET100	TRUE		FALSE		FALSE		FALSE		FALSE
F11R	FALSE		FALSE		FALSE		FALSE		FALSE
AKAP2	FALSE		FALSE		FALSE		FALSE		FALSE
ATP5MD	FALSE		FALSE		FALSE		FALSE		FALSE
ABHD16A	FALSE		FALSE		FALSE		FALSE		FALSE
NDUFAF3	FALSE		FALSE		FALSE		FALSE		FALSE
NEFM	FALSE		FALSE		FALSE		FALSE		FALSE
USP14	FALSE		FALSE		FALSE		FALSE		FALSE
TPX2	FALSE		FALSE		FALSE		FALSE		FALSE
TPM3	FALSE		FALSE		FALSE		FALSE		FALSE
SUMO4	FALSE		FALSE		FALSE		FALSE		FALSE
DHRS4	FALSE		FALSE		FALSE		FALSE		FALSE
HLA-G	FALSE		FALSE		FALSE		FALSE		FALSE
SUPT5H	FALSE		FALSE		FALSE		FALSE		FALSE
NFS1	FALSE		FALSE		FALSE		FALSE		FALSE
MCCC2	FALSE		FALSE		FALSE		FALSE		FALSE
LMBRD1	FALSE		FALSE		FALSE		FALSE		FALSE
STXBP2	FALSE		FALSE		FALSE		FALSE		FALSE
PDHB	FALSE		FALSE		FALSE		FALSE		FALSE
TMEM165	FALSE		FALSE		FALSE		FALSE		FALSE
P4HA1	FALSE		FALSE		FALSE		FALSE		FALSE
BIRC6	FALSE		FALSE		FALSE		FALSE		FALSE
LIG3	FALSE		FALSE		FALSE		FALSE		FALSE
UQCRQ	TRUE		FALSE		FALSE		FALSE		FALSE
GRPEL1	FALSE		FALSE		FALSE		FALSE		FALSE
CETN3	FALSE		FALSE		FALSE		FALSE		FALSE
SUMO3	FALSE		FALSE		FALSE		FALSE		FALSE
SUMO2	FALSE		FALSE		FALSE		FALSE		FALSE
CSNK2A1	FALSE		FALSE		FALSE		FALSE		FALSE
NDUFB5	FALSE		FALSE		FALSE		FALSE		FALSE
GPAA1	FALSE		FALSE		FALSE		FALSE		FALSE
GET3	FALSE		FALSE		FALSE		FALSE		FALSE
WDR6	FALSE		FALSE		FALSE		FALSE		FALSE
PTRH2	FALSE		FALSE		FALSE		FALSE		FALSE
EXOSC6	FALSE		FALSE		FALSE		FALSE		FALSE
NCSTN	FALSE		FALSE		FALSE		FALSE		FALSE
TOR1AIP2	FALSE		FALSE		FALSE		FALSE		FALSE
TIMM17B	TRUE		FALSE		FALSE		FALSE		FALSE
NDUFAF4	FALSE		FALSE		FALSE		FALSE		FALSE
RDH11	FALSE		FALSE		FALSE		FALSE		FALSE
FAS	FALSE		FALSE		FALSE		FALSE		FALSE
THOC3	FALSE		FALSE		FALSE		FALSE		FALSE
PAWR	FALSE		FALSE		FALSE		FALSE		FALSE
UBQLN2	FALSE		FALSE		FALSE		FALSE		FALSE
PTPMT1	FALSE		FALSE		FALSE		FALSE		FALSE
IARS2	FALSE		FALSE		FALSE		FALSE		FALSE
CHPF2	FALSE		FALSE		FALSE		FALSE		FALSE
TAGLN3	FALSE		FALSE		FALSE		FALSE		FALSE
LSM7	TRUE		FALSE		FALSE		FALSE		FALSE
ACSL4	FALSE		FALSE		FALSE		FALSE		FALSE
METTL15	FALSE		FALSE		FALSE		FALSE		FALSE
MRPL3	FALSE		FALSE		FALSE		FALSE		FALSE
YME1L1	FALSE		FALSE		FALSE		FALSE		FALSE
DYNC1LI2	FALSE		FALSE		FALSE		FALSE		FALSE
STX5	FALSE		FALSE		FALSE		FALSE		FALSE
SPTBN4	FALSE		FALSE		FALSE		FALSE		FALSE
GALNT2	FALSE		FALSE		FALSE		FALSE		FALSE
SFXN3	FALSE		FALSE		FALSE		FALSE		FALSE
KTN1	FALSE		FALSE		FALSE		FALSE		FALSE
MYO19	FALSE		FALSE		FALSE		FALSE		FALSE
NME3	FALSE		FALSE		FALSE		FALSE		FALSE
VKORC1L1	FALSE		FALSE		FALSE		FALSE		FALSE
LARP7	FALSE		FALSE		FALSE		FALSE		FALSE
TMEM259	FALSE		FALSE		FALSE		FALSE		FALSE
MXRA7	FALSE		FALSE		FALSE		FALSE		FALSE
BRWD1	FALSE		FALSE		FALSE		FALSE		FALSE
NNT	FALSE		FALSE		FALSE		FALSE		FALSE
CLPP	TRUE		FALSE		FALSE		FALSE		FALSE
PPA2	FALSE		FALSE		FALSE		FALSE		FALSE
AGPAT5	FALSE		FALSE		FALSE		FALSE		FALSE
PPP1R7	FALSE		FALSE		FALSE		FALSE		FALSE
SNRNP27	FALSE		FALSE		FALSE		FALSE		FALSE
CASKIN2	FALSE		FALSE		FALSE		FALSE		FALSE
CDK5RAP3	FALSE		FALSE		FALSE		FALSE		FALSE
HIBCH	FALSE		FALSE		FALSE		FALSE		FALSE
MTIF3	FALSE		FALSE		FALSE		FALSE		FALSE
YIPF3	FALSE		FALSE		FALSE		FALSE		FALSE
HAUS5	FALSE		FALSE		FALSE		FALSE		FALSE
GFER	FALSE		FALSE		FALSE		FALSE		FALSE
EMC4	TRUE		FALSE		FALSE		FALSE		FALSE
TAGLN2	TRUE		FALSE		FALSE		FALSE		FALSE
EMC2	FALSE		FALSE		FALSE		FALSE		FALSE
SEL1L	FALSE		FALSE		FALSE		FALSE		FALSE
MOGS	FALSE		FALSE		FALSE		FALSE		FALSE
GPD2	FALSE		FALSE		FALSE		FALSE		FALSE
MYL6B	FALSE		FALSE		FALSE		FALSE		FALSE
MTIF2	FALSE		FALSE		FALSE		FALSE		FALSE
NRP1	FALSE		FALSE		FALSE		FALSE		FALSE
SIRT5	FALSE		FALSE		FALSE		FALSE		FALSE
ENDOG	FALSE		FALSE		FALSE		FALSE		FALSE
EPHB2	FALSE		FALSE		FALSE		FALSE		FALSE
PLP2	FALSE		FALSE		FALSE		FALSE		FALSE
TMED5	FALSE		FALSE		FALSE		FALSE		FALSE
PRKAR1A	FALSE		FALSE		FALSE		FALSE		FALSE
MYL6	TRUE		FALSE		FALSE		FALSE		FALSE
TOMM20	FALSE		FALSE		FALSE		FALSE		FALSE
MGAT1	FALSE		FALSE		FALSE		FALSE		FALSE
SPTLC2	FALSE		FALSE		FALSE		FALSE		FALSE
AMOT	FALSE		FALSE		FALSE		FALSE		FALSE
EMC3	FALSE		FALSE		FALSE		FALSE		FALSE
PLEKHA7	FALSE		FALSE		FALSE		FALSE		FALSE
AHSG	FALSE		FALSE		FALSE		FALSE		FALSE
ELMOD2	FALSE		FALSE		FALSE		FALSE		FALSE
PARN	FALSE		FALSE		FALSE		FALSE		FALSE
COQ8A	FALSE		FALSE		FALSE		FALSE		FALSE
PARL	FALSE		FALSE		FALSE		FALSE		FALSE
MRPL37	TRUE		FALSE		FALSE		FALSE		FALSE
NIBAN2	FALSE		FALSE		FALSE		FALSE		FALSE
BPHL	FALSE		FALSE		FALSE		FALSE		FALSE
CPD	FALSE		FALSE		FALSE		FALSE		FALSE
FLNA	FALSE		FALSE		FALSE		FALSE		FALSE
KIF4B	FALSE		FALSE		FALSE		FALSE		FALSE
FYCO1	FALSE		FALSE		FALSE		FALSE		FALSE
PMPCA	TRUE		FALSE		FALSE		FALSE		FALSE
TMED2	FALSE		FALSE		FALSE		FALSE		FALSE
FECH	FALSE		FALSE		FALSE		FALSE		FALSE
VARS1	FALSE		FALSE		FALSE		FALSE		FALSE
CEP120	FALSE		FALSE		FALSE		FALSE		FALSE
POLDIP2	FALSE		FALSE		FALSE		FALSE		FALSE
RRS1	FALSE		FALSE		FALSE		FALSE		FALSE
SLC27A3	FALSE		FALSE		FALSE		FALSE		FALSE
SET	FALSE		FALSE		FALSE		FALSE		FALSE
SETSIP	FALSE		FALSE		FALSE		FALSE		FALSE
ASCC3	FALSE		FALSE		FALSE		FALSE		FALSE
AKAP1	FALSE		FALSE		FALSE		FALSE		FALSE
PELP1	FALSE		FALSE		FALSE		FALSE		FALSE
FLAD1	FALSE		FALSE		FALSE		FALSE		FALSE
ALDH1B1	FALSE		FALSE		FALSE		FALSE		FALSE
MTREX	FALSE		FALSE		FALSE		FALSE		FALSE
ME2	FALSE		FALSE		FALSE		FALSE		FALSE
LSM8	FALSE		FALSE		FALSE		FALSE		FALSE
UBQLN1	FALSE		FALSE		FALSE		FALSE		FALSE
TACO1	FALSE		FALSE		FALSE		FALSE		FALSE
SIRT3	FALSE		FALSE		FALSE		FALSE		FALSE
RBM42	TRUE		FALSE		FALSE		FALSE		FALSE
ERO1A	FALSE		FALSE		FALSE		FALSE		FALSE
ZNF830	FALSE		FALSE		FALSE		FALSE		FALSE
ANLN	FALSE		FALSE		FALSE		FALSE		FALSE
ATP5ME	FALSE		FALSE		FALSE		FALSE		FALSE
PITRM1	FALSE		FALSE		FALSE		FALSE		FALSE
NEURL4	FALSE		FALSE		FALSE		FALSE		FALSE
PON2	FALSE		FALSE		FALSE		FALSE		FALSE
STX8	FALSE		FALSE		FALSE		FALSE		FALSE
CHD1L	FALSE		FALSE		FALSE		FALSE		FALSE
AK4	FALSE		FALSE		FALSE		FALSE		FALSE
REXO2	FALSE		FALSE		FALSE		FALSE		FALSE
MAIP1	FALSE		FALSE		FALSE		FALSE		FALSE
GFAP	FALSE		FALSE		FALSE		FALSE		FALSE
HSD17B7	FALSE		FALSE		FALSE		FALSE		FALSE
TMX1	FALSE		FALSE		FALSE		FALSE		FALSE
NCAM1	FALSE		FALSE		FALSE		FALSE		FALSE
ATP5MGL	FALSE		FALSE		FALSE		FALSE		FALSE
ABHD12	FALSE		FALSE		FALSE		FALSE		FALSE
HSD17B8	FALSE		FALSE		FALSE		FALSE		FALSE
PDLIM1	FALSE		FALSE		FALSE		FALSE		FALSE
SP110	FALSE		FALSE		FALSE		FALSE		FALSE
EMC7	FALSE		FALSE		FALSE		FALSE		FALSE
MTX3	FALSE		FALSE		FALSE		FALSE		FALSE
RMDN1	FALSE		FALSE		FALSE		FALSE		FALSE
ARG2	FALSE		FALSE		FALSE		FALSE		FALSE
WDHD1	FALSE		FALSE		FALSE		FALSE		FALSE
KIF22	FALSE		FALSE		FALSE		FALSE		FALSE
PKP2	FALSE		FALSE		FALSE		FALSE		FALSE
PSMD10	FALSE		FALSE		FALSE		FALSE		FALSE
XPO5	FALSE		FALSE		FALSE		FALSE		FALSE
ATP5MF	FALSE		FALSE		FALSE		FALSE		FALSE
AKAP13	FALSE		FALSE		FALSE		FALSE		FALSE
GNPAT	FALSE		FALSE		FALSE		FALSE		FALSE
HMGCL	FALSE		FALSE		FALSE		FALSE		FALSE
NEFL	FALSE		FALSE		FALSE		FALSE		FALSE
EXOSC4	FALSE		FALSE		FALSE		FALSE		FALSE
GCAT	FALSE		FALSE		FALSE		FALSE		FALSE
HM13	FALSE		FALSE		FALSE		FALSE		FALSE
CLU	FALSE		FALSE		FALSE		FALSE		FALSE
PUS1	FALSE		FALSE		FALSE		FALSE		FALSE
CADM1	TRUE		FALSE		FALSE		FALSE		FALSE
CIZ1	FALSE		FALSE		FALSE		FALSE		FALSE
MTF2	FALSE		FALSE		FALSE		FALSE		FALSE
MMUT	FALSE		FALSE		FALSE		FALSE		FALSE
RMI1	FALSE		FALSE		FALSE		FALSE		FALSE
LARS1	FALSE		FALSE		FALSE		FALSE		FALSE
SCAMP2	FALSE		FALSE		FALSE		FALSE		FALSE
TXNDC12	FALSE		FALSE		FALSE		FALSE		FALSE
BCKDHB	FALSE		FALSE		FALSE		FALSE		FALSE
ARID1B	FALSE		FALSE		FALSE		FALSE		FALSE
ARV1	FALSE		FALSE		FALSE		FALSE		FALSE
TXNDC5	FALSE		FALSE		FALSE		FALSE		FALSE
INA	FALSE		FALSE		FALSE		FALSE		FALSE
YARS2	FALSE		FALSE		FALSE		FALSE		FALSE
ABCB4	FALSE		FALSE		FALSE		FALSE		FALSE
TMEM43	FALSE		FALSE		FALSE		FALSE		FALSE
ALG2	FALSE		FALSE		FALSE		FALSE		FALSE
COX11	FALSE		FALSE		FALSE		FALSE		FALSE
LMBRD2	FALSE		FALSE		FALSE		FALSE		FALSE
STX17	FALSE		FALSE		FALSE		FALSE		FALSE
ITPR3	FALSE		FALSE		FALSE		FALSE		FALSE
WARS2	FALSE		FALSE		FALSE		FALSE		FALSE
PSAP	TRUE		FALSE		FALSE		FALSE		FALSE
EDC4	FALSE		FALSE		FALSE		FALSE		FALSE
BNIP1	FALSE		FALSE		FALSE		FALSE		FALSE
IARS1	FALSE		FALSE		FALSE		FALSE		FALSE
ERH	TRUE		FALSE		FALSE		FALSE		FALSE
ALG1	FALSE		FALSE		FALSE		FALSE		FALSE
TPRN	FALSE		FALSE		FALSE		FALSE		FALSE
SRC	FALSE		FALSE		FALSE		FALSE		FALSE
XPNPEP3	FALSE		FALSE		FALSE		FALSE		FALSE
RNASET2	FALSE		FALSE		FALSE		FALSE		FALSE
NOP16	FALSE		FALSE		FALSE		FALSE		FALSE
EXOSC7	FALSE		FALSE		FALSE		FALSE		FALSE
PPM1D	FALSE		FALSE		FALSE		FALSE		FALSE
TARS2	FALSE		FALSE		FALSE		FALSE		FALSE
CENPB	FALSE		FALSE		FALSE		FALSE		FALSE
RRP12	FALSE		FALSE		FALSE		FALSE		FALSE
SFXN1	FALSE		FALSE		FALSE		FALSE		FALSE
PLS1	FALSE		FALSE		FALSE		FALSE		FALSE
PCDH7	FALSE		FALSE		FALSE		FALSE		FALSE
GATB	FALSE		FALSE		FALSE		FALSE		FALSE
GATD3A	FALSE		FALSE		FALSE		FALSE		FALSE
GATD3B	FALSE		FALSE		FALSE		FALSE		FALSE
AIMP1	FALSE		FALSE		FALSE		FALSE		FALSE
DDX55	FALSE		FALSE		FALSE		FALSE		FALSE
RFTN1	FALSE		FALSE		FALSE		FALSE		FALSE
KDSR	FALSE		FALSE		FALSE		FALSE		FALSE
MARCKS	FALSE		FALSE		FALSE		FALSE		FALSE
RIOX1	FALSE		FALSE		FALSE		FALSE		FALSE
UFSP2	FALSE		FALSE		FALSE		FALSE		FALSE
DNAJA1	FALSE		FALSE		FALSE		FALSE		FALSE
PCNA	FALSE		FALSE		FALSE		FALSE		FALSE
OCIAD2	TRUE		FALSE		FALSE		FALSE		FALSE
URB2	FALSE		FALSE		FALSE		FALSE		FALSE
BLM	FALSE		FALSE		FALSE		FALSE		FALSE
DDX51	FALSE		FALSE		FALSE		FALSE		FALSE
TRMT61B	FALSE		FALSE		FALSE		FALSE		FALSE
RABGAP1	FALSE		FALSE		FALSE		FALSE		FALSE
KLC4	FALSE		FALSE		FALSE		FALSE		FALSE
DES	FALSE		FALSE		FALSE		FALSE		FALSE
CRYZ	FALSE		FALSE		FALSE		FALSE		FALSE
DERL2	FALSE		FALSE		FALSE		FALSE		FALSE
MRE11	FALSE		FALSE		FALSE		FALSE		FALSE
ZNF593	TRUE		FALSE		FALSE		FALSE		FALSE
PRPH	FALSE		FALSE		FALSE		FALSE		FALSE
PQBP1	FALSE		FALSE		FALSE		FALSE		FALSE
MIS18A	FALSE		FALSE		FALSE		FALSE		FALSE
EIF4ENIF1	FALSE		FALSE		FALSE		FALSE		FALSE
SPIN1	FALSE		FALSE		FALSE		FALSE		FALSE
TLN2	FALSE		FALSE		FALSE		FALSE		FALSE
PEX6	FALSE		FALSE		FALSE		FALSE		FALSE
SFXN4	FALSE		FALSE		FALSE		FALSE		FALSE
MRTO4	FALSE		FALSE		FALSE		FALSE		FALSE
AHSA1	TRUE		FALSE		FALSE		FALSE		FALSE
NDUFB11	TRUE		FALSE		FALSE		FALSE		FALSE
IQSEC1	FALSE		FALSE		FALSE		FALSE		FALSE
UBQLN4	FALSE		FALSE		FALSE		FALSE		FALSE
LLPH	FALSE		FALSE		FALSE		FALSE		FALSE
PARP2	FALSE		FALSE		FALSE		FALSE		FALSE
EPHA2	FALSE		FALSE		FALSE		FALSE		FALSE
AASS	FALSE		FALSE		FALSE		FALSE		FALSE
MICOS13	FALSE		FALSE		FALSE		FALSE		FALSE
THOC2	FALSE		FALSE		FALSE		FALSE		FALSE
MARCHF5	FALSE		FALSE		FALSE		FALSE		FALSE
TOP3A	FALSE		FALSE		FALSE		FALSE		FALSE
DENND4C	FALSE		FALSE		FALSE		FALSE		FALSE
KATNB1	FALSE		FALSE		FALSE		FALSE		FALSE
COX15	FALSE		FALSE		FALSE		FALSE		FALSE
RPF2	FALSE		FALSE		FALSE		FALSE		FALSE
BCS1L	TRUE		FALSE		FALSE		FALSE		FALSE
SRP54	FALSE		FALSE		FALSE		FALSE		FALSE
TLN1	FALSE		FALSE		FALSE		FALSE		FALSE
FDX1	FALSE		FALSE		FALSE		FALSE		FALSE
ALDH18A1	FALSE		FALSE		FALSE		FALSE		FALSE
HSPA9	FALSE		FALSE		FALSE		FALSE		FALSE
ACACA	FALSE		FALSE		FALSE		FALSE		FALSE
DHRS7	FALSE		FALSE		FALSE		FALSE		FALSE
HNRNPUL1	FALSE		FALSE		FALSE		FALSE		FALSE
TEX10	FALSE		FALSE		FALSE		FALSE		FALSE
ARPC2	FALSE		FALSE		FALSE		FALSE		FALSE
SLC25A13	FALSE		FALSE		FALSE		FALSE		FALSE
CEPT1	FALSE		FALSE		FALSE		FALSE		FALSE
IDH3A	FALSE		FALSE		FALSE		FALSE		FALSE
MPRIP	FALSE		FALSE		FALSE		FALSE		FALSE
AFG3L2	FALSE		FALSE		FALSE		FALSE		FALSE
ACSF3	FALSE		FALSE		FALSE		FALSE		FALSE
EXOSC3	FALSE		FALSE		FALSE		FALSE		FALSE
BUB1	FALSE		FALSE		FALSE		FALSE		FALSE
LIMA1	FALSE		FALSE		FALSE		FALSE		FALSE
PHLDB2	FALSE		FALSE		FALSE		FALSE		FALSE
USP6NL	FALSE		FALSE		FALSE		FALSE		FALSE
TOR1A	FALSE		FALSE		FALSE		FALSE		FALSE
WASHC4	FALSE		FALSE		FALSE		FALSE		FALSE
APC	FALSE		FALSE		FALSE		FALSE		FALSE
GPT2	FALSE		FALSE		FALSE		FALSE		FALSE
RSL24D1	FALSE		FALSE		FALSE		FALSE		FALSE
LTN1	FALSE		FALSE		FALSE		FALSE		FALSE
ATF3	FALSE		FALSE		FALSE		FALSE		FALSE
COX7A2L	TRUE		FALSE		FALSE		FALSE		FALSE
DHODH	FALSE		FALSE		FALSE		FALSE		FALSE
CEMIP2	FALSE		FALSE		FALSE		FALSE		FALSE
MINPP1	FALSE		FALSE		FALSE		FALSE		FALSE
NEFH	FALSE		FALSE		FALSE		FALSE		FALSE
SVIL	FALSE		FALSE		FALSE		FALSE		FALSE
ARPC5	FALSE		FALSE		FALSE		FALSE		FALSE
ARHGEF2	FALSE		FALSE		FALSE		FALSE		FALSE
PURA	FALSE		FALSE		FALSE		FALSE		FALSE
PDZD8	FALSE		FALSE		FALSE		FALSE		FALSE
EPHA3	FALSE		FALSE		FALSE		FALSE		FALSE
EPHA5	FALSE		FALSE		FALSE		FALSE		FALSE
AIMP2	TRUE		FALSE		FALSE		FALSE		FALSE
TXLNG	FALSE		FALSE		FALSE		FALSE		FALSE
SCD	FALSE		FALSE		FALSE		FALSE		FALSE
SLC25A12	FALSE		FALSE		FALSE		FALSE		FALSE
KARS1	FALSE		FALSE		FALSE		FALSE		FALSE
SYNJ2BP	FALSE		FALSE		FALSE		FALSE		FALSE
SUMO1P1	FALSE		FALSE		FALSE		FALSE		FALSE
MPV17L2	FALSE		FALSE		FALSE		FALSE		FALSE
SLC25A19	FALSE		FALSE		FALSE		FALSE		FALSE
MICU2	FALSE		FALSE		FALSE		FALSE		FALSE
ZNF318	FALSE		FALSE		FALSE		FALSE		FALSE
MBD2	FALSE		FALSE		FALSE		FALSE		FALSE
VMP1	FALSE		FALSE		FALSE		FALSE		FALSE
HS2ST1	FALSE		FALSE		FALSE		FALSE		FALSE
UFL1	FALSE		FALSE		FALSE		FALSE		FALSE
GALNT7	FALSE		FALSE		FALSE		FALSE		FALSE
JAK1	FALSE		FALSE		FALSE		FALSE		FALSE
RARS1	FALSE		FALSE		FALSE		FALSE		FALSE
CEP128	FALSE		FALSE		FALSE		FALSE		FALSE
GARS1	FALSE		FALSE		FALSE		FALSE		FALSE
JCAD	FALSE		FALSE		FALSE		FALSE		FALSE
RAD50	FALSE		FALSE		FALSE		FALSE		FALSE
ARHGAP21	FALSE		FALSE		FALSE		FALSE		FALSE
GPI	FALSE		FALSE		FALSE		FALSE		FALSE
ARFGEF1	FALSE		FALSE		FALSE		FALSE		FALSE
EMC1	FALSE		FALSE		FALSE		FALSE		FALSE
TMEM160	TRUE		FALSE		FALSE		FALSE		FALSE
EMC8	FALSE		FALSE		FALSE		FALSE		FALSE
EXOSC8	FALSE		FALSE		FALSE		FALSE		FALSE
MKI67	FALSE		FALSE		FALSE		FALSE		FALSE
STX18	FALSE		FALSE		FALSE		FALSE		FALSE
HSPA7	FALSE		FALSE		FALSE		FALSE		FALSE
RPL7L1	FALSE		FALSE		FALSE		FALSE		FALSE
DNAJA2	FALSE		FALSE		FALSE		FALSE		FALSE
NEK9	FALSE		FALSE		FALSE		FALSE		FALSE
SEC63	FALSE		FALSE		FALSE		FALSE		FALSE
AUP1	FALSE		FALSE		FALSE		FALSE		FALSE
PSMC4	FALSE		FALSE		FALSE		FALSE		FALSE
KATNA1	FALSE		FALSE		FALSE		FALSE		FALSE
TMEM237	FALSE		FALSE		FALSE		FALSE		FALSE
HLA-C	TRUE		FALSE		FALSE		FALSE		FALSE
TSPYL1	FALSE		FALSE		FALSE		FALSE		FALSE
CYC1	TRUE		FALSE		FALSE		FALSE		FALSE
USF1	FALSE		FALSE		FALSE		FALSE		FALSE
GRSF1	FALSE		FALSE		FALSE		FALSE		FALSE
VKORC1	TRUE		FALSE		FALSE		FALSE		FALSE
ANTXR1	FALSE		FALSE		FALSE		FALSE		FALSE
CCDC12	FALSE		FALSE		FALSE		FALSE		FALSE
GSK3A	FALSE		FALSE		FALSE		FALSE		FALSE
NOL8	FALSE		FALSE		FALSE		FALSE		FALSE
C5orf24	FALSE		FALSE		FALSE		FALSE		FALSE
VIM	FALSE		FALSE		FALSE		FALSE		FALSE
EXOSC2	FALSE		FALSE		FALSE		FALSE		FALSE
MTFR1L	FALSE		FALSE		FALSE		FALSE		FALSE
TAP2	FALSE		FALSE		FALSE		FALSE		FALSE
DAAM1	FALSE		FALSE		FALSE		FALSE		FALSE
MTX1	FALSE		FALSE		FALSE		FALSE		FALSE
BCKDK	FALSE		FALSE		FALSE		FALSE		FALSE
NOL12	FALSE		FALSE		FALSE		FALSE		FALSE
FBN2	FALSE		FALSE		FALSE		FALSE		FALSE
ABCB1	FALSE		FALSE		FALSE		FALSE		FALSE
CYB5R1	FALSE		FALSE		FALSE		FALSE		FALSE
FTSJ3	FALSE		FALSE		FALSE		FALSE		FALSE
PATZ1	FALSE		FALSE		FALSE		FALSE		FALSE
CDCA3	FALSE		FALSE		FALSE		FALSE		FALSE
ACOX1	FALSE		FALSE		FALSE		FALSE		FALSE
CHCHD3	FALSE		FALSE		FALSE		FALSE		FALSE
HOOK1	FALSE		FALSE		FALSE		FALSE		FALSE
MARS1	FALSE		FALSE		FALSE		FALSE		FALSE
AMFR	FALSE		FALSE		FALSE		FALSE		FALSE
BCL2L13	FALSE		FALSE		FALSE		FALSE		FALSE
BTN2A1	FALSE		FALSE		FALSE		FALSE		FALSE
MARK3	FALSE		FALSE		FALSE		FALSE		FALSE
FHL2	FALSE		FALSE		FALSE		FALSE		FALSE
YBX1	FALSE		FALSE		FALSE		FALSE		FALSE
POLE3	FALSE		FALSE		FALSE		FALSE		FALSE
MCU	FALSE		FALSE		FALSE		FALSE		FALSE
TES	FALSE		FALSE		FALSE		FALSE		FALSE
LOC102724159	FALSE		FALSE		FALSE		FALSE		FALSE
MIB1	FALSE		FALSE		FALSE		FALSE		FALSE
DPAGT1	FALSE		FALSE		FALSE		FALSE		FALSE
TAP1	FALSE		FALSE		FALSE		FALSE		FALSE
MRPL1	FALSE		FALSE		FALSE		FALSE		FALSE
ACTR2	FALSE		FALSE		FALSE		FALSE		FALSE
TRIP13	FALSE		FALSE		FALSE		FALSE		FALSE
MTPAP	FALSE		FALSE		FALSE		FALSE		FALSE
SNF8	FALSE		FALSE		FALSE		FALSE		FALSE
HTRA2	FALSE		FALSE		FALSE		FALSE		FALSE
CDYL	FALSE		FALSE		FALSE		FALSE		FALSE
DST	FALSE		FALSE		FALSE		FALSE		FALSE
STING1	FALSE		FALSE		FALSE		FALSE		FALSE
PFDN6	TRUE		FALSE		FALSE		FALSE		FALSE
SUMO1	FALSE		FALSE		FALSE		FALSE		FALSE
EXOSC5	FALSE		FALSE		FALSE		FALSE		FALSE
PWP2	FALSE		FALSE		FALSE		FALSE		FALSE
FAM3C	FALSE		FALSE		FALSE		FALSE		FALSE
WDR18	TRUE		FALSE		FALSE		FALSE		FALSE
GOT2	FALSE		FALSE		FALSE		FALSE		FALSE
HLA-E	FALSE		FALSE		FALSE		FALSE		FALSE
ATP5F1B	FALSE		FALSE		FALSE		FALSE		FALSE
SLC25A3	TRUE		FALSE		FALSE		FALSE		FALSE
CUX1	FALSE		FALSE		FALSE		FALSE		FALSE
TM9SF3	FALSE		FALSE		FALSE		FALSE		FALSE
MRPL21	FALSE		FALSE		FALSE		FALSE		FALSE
COG8	FALSE		FALSE		FALSE		FALSE		FALSE
ATP5F1A	FALSE		FALSE		FALSE		FALSE		FALSE
LMAN1	FALSE		FALSE		FALSE		FALSE		FALSE
CADM4	FALSE		FALSE		FALSE		FALSE		FALSE
AFDN	FALSE		FALSE		FALSE		FALSE		FALSE
TBL2	TRUE		FALSE		FALSE		FALSE		FALSE
C11orf98	FALSE		FALSE		FALSE		FALSE		FALSE
MACO1	FALSE		FALSE		FALSE		FALSE		FALSE
EIF5B	FALSE		FALSE		FALSE		FALSE		FALSE
CTSB	TRUE		FALSE		FALSE		FALSE		FALSE
YJU2	FALSE		FALSE		FALSE		FALSE		FALSE
STX4	FALSE		FALSE		FALSE		FALSE		FALSE
BIRC5	FALSE		FALSE		FALSE		FALSE		FALSE
HSPA1A	FALSE		FALSE		FALSE		FALSE		FALSE
HSPA1B	FALSE		FALSE		FALSE		FALSE		FALSE
APOOL	FALSE		FALSE		FALSE		FALSE		FALSE
GOSR1	FALSE		FALSE		FALSE		FALSE		FALSE
MIEN1	FALSE		FALSE		FALSE		FALSE		FALSE
HAUS6	FALSE		FALSE		FALSE		FALSE		FALSE
BAK1	FALSE		FALSE		FALSE		FALSE		FALSE
RPLP1	TRUE		FALSE		FALSE		FALSE		FALSE
SCAF8	FALSE		FALSE		FALSE		FALSE		FALSE
ATP5PB	FALSE		FALSE		FALSE		FALSE		FALSE
MMGT1	FALSE		FALSE		FALSE		FALSE		FALSE
HADHB	FALSE		FALSE		FALSE		FALSE		FALSE
HEXA	TRUE		FALSE		FALSE		FALSE		FALSE
SUCLA2	FALSE		FALSE		FALSE		FALSE		FALSE
GDE1	FALSE		FALSE		FALSE		FALSE		FALSE
CTTN	FALSE		FALSE		FALSE		FALSE		FALSE
ZFPL1	FALSE		FALSE		FALSE		FALSE		FALSE
SPAG5	FALSE		FALSE		FALSE		FALSE		FALSE
TAF1	FALSE		FALSE		FALSE		FALSE		FALSE
MYBBP1A	FALSE		FALSE		FALSE		FALSE		FALSE
ATP5F1C	FALSE		FALSE		FALSE		FALSE		FALSE
HPS6	FALSE		FALSE		FALSE		FALSE		FALSE
DDX39B	FALSE		FALSE		FALSE		FALSE		FALSE
TOP2A	FALSE		FALSE		FALSE		FALSE		FALSE
MTCH2	FALSE		FALSE		FALSE		FALSE		FALSE
ACADSB	FALSE		FALSE		FALSE		FALSE		FALSE
FNDC3B	FALSE		FALSE		FALSE		FALSE		FALSE
CSNK2B	TRUE		FALSE		FALSE		FALSE		FALSE
PREPL	FALSE		FALSE		FALSE		FALSE		FALSE
NBN	FALSE		FALSE		FALSE		FALSE		FALSE
CBLL1	FALSE		FALSE		FALSE		FALSE		FALSE
ANO6	FALSE		FALSE		FALSE		FALSE		FALSE
ALDH4A1	FALSE		FALSE		FALSE		FALSE		FALSE
ACBD5	FALSE		FALSE		FALSE		FALSE		FALSE
FAM207A	FALSE		FALSE		FALSE		FALSE		FALSE
ACACB	FALSE		FALSE		FALSE		FALSE		FALSE
TRMU	FALSE		FALSE		FALSE		FALSE		FALSE
RBM25	FALSE		FALSE		FALSE		FALSE		FALSE
GOLM2	FALSE		FALSE		FALSE		FALSE		FALSE
CD2AP	FALSE		FALSE		FALSE		FALSE		FALSE
ZNF48	FALSE		FALSE		FALSE		FALSE		FALSE
VTI1B	FALSE		FALSE		FALSE		FALSE		FALSE
ACAA2	FALSE		FALSE		FALSE		FALSE		FALSE
CIT	FALSE		FALSE		FALSE		FALSE		FALSE
POR	TRUE		FALSE		FALSE		FALSE		FALSE
SSRP1	FALSE		FALSE		FALSE		FALSE		FALSE
GGH	FALSE		FALSE		FALSE		FALSE		FALSE
HADHA	TRUE		FALSE		FALSE		FALSE		FALSE
CS	TRUE		FALSE		FALSE		FALSE		FALSE
NLN	FALSE		FALSE		FALSE		FALSE		FALSE
RAI1	FALSE		FALSE		FALSE		FALSE		FALSE
SELENOS	FALSE		FALSE		FALSE		FALSE		FALSE
LEMD2	FALSE		FALSE		FALSE		FALSE		FALSE
ITGA6	FALSE		FALSE		FALSE		FALSE		FALSE
MCAT	FALSE		FALSE		FALSE		FALSE		FALSE
GOLIM4	FALSE		FALSE		FALSE		FALSE		FALSE
MDC1	FALSE		FALSE		FALSE		FALSE		FALSE
SIGMAR1	TRUE		FALSE		FALSE		FALSE		FALSE
ARF5	TRUE		FALSE		FALSE		FALSE		FALSE
SNX9	FALSE		FALSE		FALSE		FALSE		FALSE
MNAT1	FALSE		FALSE		FALSE		FALSE		FALSE
CERS2	FALSE		FALSE		FALSE		FALSE		FALSE
BUB1B	FALSE		FALSE		FALSE		FALSE		FALSE
HARS1	FALSE		FALSE		FALSE		FALSE		FALSE
PRDX3	FALSE		FALSE		FALSE		FALSE		FALSE
TMUB2	FALSE		FALSE		FALSE		FALSE		FALSE
MAP2K4	FALSE		FALSE		FALSE		FALSE		FALSE
SH3GLB2	FALSE		FALSE		FALSE		FALSE		FALSE
NEDD8	TRUE		FALSE		FALSE		FALSE		FALSE
TMEM214	FALSE		FALSE		FALSE		FALSE		FALSE
AGK	FALSE		FALSE		FALSE		FALSE		FALSE
M6PR	FALSE		FALSE		FALSE		FALSE		FALSE
RRP36	FALSE		FALSE		FALSE		FALSE		FALSE
LMAN2L	FALSE		FALSE		FALSE		FALSE		FALSE
ATP5MG	FALSE		FALSE		FALSE		FALSE		FALSE
SEC23B	FALSE		FALSE		FALSE		FALSE		FALSE
UTP3	FALSE		FALSE		FALSE		FALSE		FALSE
GDPD1	FALSE		FALSE		FALSE		FALSE		FALSE
SDE2	FALSE		FALSE		FALSE		FALSE		FALSE
ARL6IP6	FALSE		FALSE		FALSE		FALSE		FALSE
DTNA	FALSE		FALSE		FALSE		FALSE		FALSE
MYO1B	FALSE		FALSE		FALSE		FALSE		FALSE
HAT1	FALSE		FALSE		FALSE		FALSE		FALSE
ESYT1	FALSE		FALSE		FALSE		FALSE		FALSE
ADGRL2	FALSE		FALSE		FALSE		FALSE		FALSE
AIFM1	FALSE		FALSE		FALSE		FALSE		FALSE
LETM1	FALSE		FALSE		FALSE		FALSE		FALSE
ADPRS	FALSE		FALSE		FALSE		FALSE		FALSE
KNOP1	FALSE		FALSE		FALSE		FALSE		FALSE
PHIP	FALSE		FALSE		FALSE		FALSE		FALSE
GET1	FALSE		FALSE		FALSE		FALSE		FALSE
KPNA6	FALSE		FALSE		FALSE		FALSE		FALSE
CSNK2A2	FALSE		FALSE		FALSE		FALSE		FALSE
ACADS	FALSE		FALSE		FALSE		FALSE		FALSE
ATP5PO	FALSE		FALSE		FALSE		FALSE		FALSE
TSC2	FALSE		FALSE		FALSE		FALSE		FALSE
MRPL34	TRUE		FALSE		FALSE		FALSE		FALSE
TRUB1	FALSE		FALSE		FALSE		FALSE		FALSE
MCUR1	FALSE		FALSE		FALSE		FALSE		FALSE
DDX24	FALSE		FALSE		FALSE		FALSE		FALSE
AKAP12	FALSE		FALSE		FALSE		FALSE		FALSE
CDH2	FALSE		FALSE		FALSE		FALSE		FALSE
INTS3	FALSE		FALSE		FALSE		FALSE		FALSE
RTN4	FALSE		FALSE		FALSE		FALSE		FALSE
NOL6	FALSE		FALSE		FALSE		FALSE		FALSE
ECPAS	FALSE		FALSE		FALSE		FALSE		FALSE
CEP290	FALSE		FALSE		FALSE		FALSE		FALSE
NADK2	FALSE		FALSE		FALSE		FALSE		FALSE
POTEJ	FALSE		FALSE		FALSE		FALSE		FALSE
TOMM40	FALSE		FALSE		FALSE		FALSE		FALSE
ATP6V0A2	FALSE		FALSE		FALSE		FALSE		FALSE
SNX2	FALSE		FALSE		FALSE		FALSE		FALSE
NIFK	FALSE		FALSE		FALSE		FALSE		FALSE
POLR2D	FALSE		FALSE		FALSE		FALSE		FALSE
EPRS1	FALSE		FALSE		FALSE		FALSE		FALSE
CDC34	TRUE		FALSE		FALSE		FALSE		FALSE
NPC1	FALSE		FALSE		FALSE		FALSE		FALSE
AK3	FALSE		FALSE		FALSE		FALSE		FALSE
BAG2	FALSE		FALSE		FALSE		FALSE		FALSE
KIF11	FALSE		FALSE		FALSE		FALSE		FALSE
RHOT2	FALSE		FALSE		FALSE		FALSE		FALSE
FTSJ1	FALSE		FALSE		FALSE		FALSE		FALSE
HSPA6	FALSE		FALSE		FALSE		FALSE		FALSE
SARAF	FALSE		FALSE		FALSE		FALSE		FALSE
WBP11	FALSE		FALSE		FALSE		FALSE		FALSE
POFUT1	FALSE		FALSE		FALSE		FALSE		FALSE
PPIL3	FALSE		FALSE		FALSE		FALSE		FALSE
MRC2	FALSE		FALSE		FALSE		FALSE		FALSE
PURB	FALSE		FALSE		FALSE		FALSE		FALSE
GOLGA4	FALSE		FALSE		FALSE		FALSE		FALSE
RAB14	FALSE		FALSE		FALSE		FALSE		FALSE
ITGAV	FALSE		FALSE		FALSE		FALSE		FALSE
ATP5MPL	FALSE		FALSE		FALSE		FALSE		FALSE
SAMD1	FALSE		FALSE		FALSE		FALSE		FALSE
MFAP1	FALSE		FALSE		FALSE		FALSE		FALSE
WRNIP1	FALSE		FALSE		FALSE		FALSE		FALSE
AP1S1	TRUE		FALSE		FALSE		FALSE		FALSE
LRRC59	FALSE		FALSE		FALSE		FALSE		FALSE
ATP5F1E	FALSE		FALSE		FALSE		FALSE		FALSE
PATL1	FALSE		FALSE		FALSE		FALSE		FALSE
ATP5F1EP2	FALSE		FALSE		FALSE		FALSE		FALSE
BAZ2B	FALSE		FALSE		FALSE		FALSE		FALSE
TACC1	FALSE		FALSE		FALSE		FALSE		FALSE
ZMPSTE24	FALSE		FALSE		FALSE		FALSE		FALSE
RPL37A	TRUE		FALSE		FALSE		FALSE		FALSE
HDHD5	FALSE		FALSE		FALSE		FALSE		FALSE
ACP2	FALSE		FALSE		FALSE		FALSE		FALSE
PGRMC2	FALSE		FALSE		FALSE		FALSE		FALSE
RCC1L	FALSE		FALSE		FALSE		FALSE		FALSE
CPVL	FALSE		FALSE		FALSE		FALSE		FALSE
ALG9	FALSE		FALSE		FALSE		FALSE		FALSE
PRIM1	FALSE		FALSE		FALSE		FALSE		FALSE
SDF2L1	TRUE		FALSE		FALSE		FALSE		FALSE
NOMO1	FALSE		FALSE		FALSE		FALSE		FALSE
NOMO3	FALSE		FALSE		FALSE		FALSE		FALSE
NOMO2	FALSE		FALSE		FALSE		FALSE		FALSE
IVD	FALSE		FALSE		FALSE		FALSE		FALSE
SSR1	FALSE		FALSE		FALSE		FALSE		FALSE
ILVBL	TRUE		FALSE		FALSE		FALSE		FALSE
LAMB1	FALSE		FALSE		FALSE		FALSE		FALSE
RAB18	FALSE		FALSE		FALSE		FALSE		FALSE
TOM1	TRUE		FALSE		FALSE		FALSE		FALSE
PRPF38B	FALSE		FALSE		FALSE		FALSE		FALSE
DNAJC19	FALSE		FALSE		FALSE		FALSE		FALSE
CCNY	FALSE		FALSE		FALSE		FALSE		FALSE
LASP1	FALSE		FALSE		FALSE		FALSE		FALSE
ACIN1	FALSE		FALSE		FALSE		FALSE		FALSE
DDX39A	FALSE		FALSE		FALSE		FALSE		FALSE
DR1	FALSE		FALSE		FALSE		FALSE		FALSE
ADSS2	FALSE		FALSE		FALSE		FALSE		FALSE
FBLL1	FALSE		FALSE		FALSE		FALSE		FALSE
SLU7	FALSE		FALSE		FALSE		FALSE		FALSE
CTNNA2	FALSE		FALSE		FALSE		FALSE		FALSE
EXOSC10	FALSE		FALSE		FALSE		FALSE		FALSE
ENPP1	FALSE		FALSE		FALSE		FALSE		FALSE
FLNC	FALSE		FALSE		FALSE		FALSE		FALSE
PUM3	FALSE		FALSE		FALSE		FALSE		FALSE
KIAA1522	FALSE		FALSE		FALSE		FALSE		FALSE
CLPTM1	FALSE		FALSE		FALSE		FALSE		FALSE
ECD	FALSE		FALSE		FALSE		FALSE		FALSE
POTEI	FALSE		FALSE		FALSE		FALSE		FALSE
FNBP1L	FALSE		FALSE		FALSE		FALSE		FALSE
FAM20B	FALSE		FALSE		FALSE		FALSE		FALSE
TENM3	FALSE		FALSE		FALSE		FALSE		FALSE
SART1	FALSE		FALSE		FALSE		FALSE		FALSE
PSMB1	TRUE		FALSE		FALSE		FALSE		FALSE
EBNA1BP2	FALSE		FALSE		FALSE		FALSE		FALSE
DNAJB14	FALSE		FALSE		FALSE		FALSE		FALSE
OCIAD1	FALSE		FALSE		FALSE		FALSE		FALSE
VTA1	FALSE		FALSE		FALSE		FALSE		FALSE
TMEM205	TRUE		FALSE		FALSE		FALSE		FALSE
LRBA	FALSE		FALSE		FALSE		FALSE		FALSE
SHROOM2	FALSE		FALSE		FALSE		FALSE		FALSE
PWWP2A	FALSE		FALSE		FALSE		FALSE		FALSE
INF2	FALSE		FALSE		FALSE		FALSE		FALSE
ENDOD1	FALSE		FALSE		FALSE		FALSE		FALSE
DCAF7	FALSE		FALSE		FALSE		FALSE		FALSE
CCDC115	FALSE		FALSE		FALSE		FALSE		FALSE
MDH2	TRUE		FALSE		FALSE		FALSE		FALSE
PAF1	FALSE		FALSE		FALSE		FALSE		FALSE
DHX30	FALSE		FALSE		FALSE		FALSE		FALSE
C17orf80	FALSE		FALSE		FALSE		FALSE		FALSE
RPL12	FALSE		FALSE		FALSE		FALSE		FALSE
PABPC4L	FALSE		FALSE		FALSE		FALSE		FALSE
TXN2	FALSE		FALSE		FALSE		FALSE		FALSE
ARL1	FALSE		FALSE		FALSE		FALSE		FALSE
CACNA2D1	FALSE		FALSE		FALSE		FALSE		FALSE
PARD6G	FALSE		FALSE		FALSE		FALSE		FALSE
PRKCSH	FALSE		FALSE		FALSE		FALSE		FALSE
USE1	FALSE		FALSE		FALSE		FALSE		FALSE
RPS28	TRUE		FALSE		FALSE		FALSE		FALSE
KYAT3	FALSE		FALSE		FALSE		FALSE		FALSE
ARVCF	FALSE		FALSE		FALSE		FALSE		FALSE
NCLN	FALSE		FALSE		FALSE		FALSE		FALSE
HMGN4	FALSE		FALSE		FALSE		FALSE		FALSE
SPOUT1	FALSE		FALSE		FALSE		FALSE		FALSE
RPS23	TRUE		FALSE		FALSE		FALSE		FALSE
PABPC4	FALSE		FALSE		FALSE		FALSE		FALSE
FADS2	TRUE		FALSE		FALSE		FALSE		FALSE
RRP1	FALSE		FALSE		FALSE		FALSE		FALSE
PEAK1	FALSE		FALSE		FALSE		FALSE		FALSE
RAB5C	TRUE		FALSE		FALSE		FALSE		FALSE
RPS19BP1	FALSE		FALSE		FALSE		FALSE		FALSE
SMNDC1	FALSE		FALSE		FALSE		FALSE		FALSE
STAT3	FALSE		FALSE		FALSE		FALSE		FALSE
PHLDB1	FALSE		FALSE		FALSE		FALSE		FALSE
BRIX1	FALSE		FALSE		FALSE		FALSE		FALSE
OSBP	FALSE		FALSE		FALSE		FALSE		FALSE
EIF6	TRUE		FALSE		FALSE		FALSE		FALSE
UBXN6	FALSE		FALSE		FALSE		FALSE		FALSE
EXOSC1	FALSE		FALSE		FALSE		FALSE		FALSE
SPCS1	TRUE		FALSE		FALSE		FALSE		FALSE
VAPA	FALSE		FALSE		FALSE		FALSE		FALSE
CDC42BPB	FALSE		FALSE		FALSE		FALSE		FALSE
ABCF1	FALSE		FALSE		FALSE		FALSE		FALSE
CETN2	FALSE		FALSE		FALSE		FALSE		FALSE
HNRNPA0	FALSE		FALSE		FALSE		FALSE		FALSE
CEP250	FALSE		FALSE		FALSE		FALSE		FALSE
FLNB	FALSE		FALSE		FALSE		FALSE		FALSE
MAP2K7	FALSE		FALSE		FALSE		FALSE		FALSE
EGFR	FALSE		FALSE		FALSE		FALSE		FALSE
FDFT1	TRUE		FALSE		FALSE		FALSE		FALSE
SKP1	TRUE		FALSE		FALSE		FALSE		FALSE
GNG12	FALSE		FALSE		FALSE		FALSE		FALSE
MAP3K20	FALSE		FALSE		FALSE		FALSE		FALSE
IMMT	FALSE		FALSE		FALSE		FALSE		FALSE
INTS9	FALSE		FALSE		FALSE		FALSE		FALSE
SPTLC1	FALSE		FALSE		FALSE		FALSE		FALSE
TBL3	FALSE		FALSE		FALSE		FALSE		FALSE
MACF1	FALSE		FALSE		FALSE		FALSE		FALSE
BOLA2	FALSE		FALSE		FALSE		FALSE		FALSE
RPS6	TRUE		FALSE		FALSE		FALSE		FALSE
TRMT1L	FALSE		FALSE		FALSE		FALSE		FALSE
RPL31	FALSE		FALSE		FALSE		FALSE		FALSE
SRP19	FALSE		FALSE		FALSE		FALSE		FALSE
SYF2	FALSE		FALSE		FALSE		FALSE		FALSE
OAT	FALSE		FALSE		FALSE		FALSE		FALSE
IWS1	FALSE		FALSE		FALSE		FALSE		FALSE
RPL29	TRUE		FALSE		FALSE		FALSE		FALSE
PML	FALSE		FALSE		FALSE		FALSE		FALSE
SNX27	FALSE		FALSE		FALSE		FALSE		FALSE
EMC6	TRUE		FALSE		FALSE		FALSE		FALSE
DTYMK	TRUE		FALSE		FALSE		FALSE		FALSE
AGPS	FALSE		FALSE		FALSE		FALSE		FALSE
ODR4	FALSE		FALSE		FALSE		FALSE		FALSE
B3GAT3	TRUE		FALSE		FALSE		FALSE		FALSE
KCMF1	FALSE		FALSE		FALSE		FALSE		FALSE
SLC35F6	FALSE		FALSE		FALSE		FALSE		FALSE
HSPA1L	FALSE		FALSE		FALSE		FALSE		FALSE
SUPT16H	FALSE		FALSE		FALSE		FALSE		FALSE
ARL2	TRUE		FALSE		FALSE		FALSE		FALSE
POTEF	FALSE		FALSE		FALSE		FALSE		FALSE
NOP2	FALSE		FALSE		FALSE		FALSE		FALSE
MTX2	FALSE		FALSE		FALSE		FALSE		FALSE
RPL7A	FALSE		FALSE		FALSE		FALSE		FALSE
HAUS1	FALSE		FALSE		FALSE		FALSE		FALSE
PPL	FALSE		FALSE		FALSE		FALSE		FALSE
RALGAPA1	FALSE		FALSE		FALSE		FALSE		FALSE
ATP6V1E1	TRUE		FALSE		FALSE		FALSE		FALSE
DHTKD1	FALSE		FALSE		FALSE		FALSE		FALSE
GLOD4	FALSE		FALSE		FALSE		FALSE		FALSE
RNF113A	FALSE		FALSE		FALSE		FALSE		FALSE
MMAB	FALSE		FALSE		FALSE		FALSE		FALSE
DIS3	FALSE		FALSE		FALSE		FALSE		FALSE
TRA2A	FALSE		FALSE		FALSE		FALSE		FALSE
GOSR2	FALSE		FALSE		FALSE		FALSE		FALSE
DDX3X	FALSE		FALSE		FALSE		FALSE		FALSE
CD58	FALSE		FALSE		FALSE		FALSE		FALSE
BCL2L2	FALSE		FALSE		FALSE		FALSE		FALSE
UBC	TRUE		FALSE		FALSE		FALSE		FALSE
CABIN1	FALSE		FALSE		FALSE		FALSE		FALSE
WDR36	FALSE		FALSE		FALSE		FALSE		FALSE
LYPLA1	FALSE		FALSE		FALSE		FALSE		FALSE
UNC93B1	FALSE		FALSE		FALSE		FALSE		FALSE
PSMG1	FALSE		FALSE		FALSE		FALSE		FALSE
PDXDC1	FALSE		FALSE		FALSE		FALSE		FALSE
RPS27A	TRUE		FALSE		FALSE		FALSE		FALSE
POTEE	FALSE		FALSE		FALSE		FALSE		FALSE
UBB	TRUE		FALSE		FALSE		FALSE		FALSE
UBA52	TRUE		FALSE		FALSE		FALSE		FALSE
SBF1	FALSE		FALSE		FALSE		FALSE		FALSE
RPS16	TRUE		FALSE		FALSE		FALSE		FALSE
RPL23A	FALSE		FALSE		FALSE		FALSE		FALSE
UBE2G2	FALSE		FALSE		FALSE		FALSE		FALSE
GSTK1	FALSE		FALSE		FALSE		FALSE		FALSE
JTB	TRUE		FALSE		FALSE		FALSE		FALSE
CAT	FALSE		FALSE		FALSE		FALSE		FALSE
DARS1	FALSE		FALSE		FALSE		FALSE		FALSE
RPA2	FALSE		FALSE		FALSE		FALSE		FALSE
DNASE2	FALSE		FALSE		FALSE		FALSE		FALSE
MAP1S	FALSE		FALSE		FALSE		FALSE		FALSE
GLUD2	FALSE		FALSE		FALSE		FALSE		FALSE
ZDHHC20	FALSE		FALSE		FALSE		FALSE		FALSE
SNU13	FALSE		FALSE		FALSE		FALSE		FALSE
SRCAP	FALSE		FALSE		FALSE		FALSE		FALSE
ENAH	FALSE		FALSE		FALSE		FALSE		FALSE
EXOC6	FALSE		FALSE		FALSE		FALSE		FALSE
RSL1D1	FALSE		FALSE		FALSE		FALSE		FALSE
RPL19	FALSE		FALSE		FALSE		FALSE		FALSE
WDR46	FALSE		FALSE		FALSE		FALSE		FALSE
TBCC	FALSE		FALSE		FALSE		FALSE		FALSE
SCAF4	FALSE		FALSE		FALSE		FALSE		FALSE
METAP2	FALSE		FALSE		FALSE		FALSE		FALSE
TMX3	FALSE		FALSE		FALSE		FALSE		FALSE
GSK3B	FALSE		FALSE		FALSE		FALSE		FALSE
MPHOSPH10	FALSE		FALSE		FALSE		FALSE		FALSE
ATP6V1D	FALSE		FALSE		FALSE		FALSE		FALSE
PISD	FALSE		FALSE		FALSE		FALSE		FALSE
LSM6	FALSE		FALSE		FALSE		FALSE		FALSE
MYO1A	FALSE		FALSE		FALSE		FALSE		FALSE
NCOR1	FALSE		FALSE		FALSE		FALSE		FALSE
S100A10	TRUE		FALSE		FALSE		FALSE		FALSE
PTDSS2	FALSE		FALSE		FALSE		FALSE		FALSE
ZC3H14	FALSE		FALSE		FALSE		FALSE		FALSE
GCC2	FALSE		FALSE		FALSE		FALSE		FALSE
TMED4	FALSE		FALSE		FALSE		FALSE		FALSE
SRSF8	FALSE		FALSE		FALSE		FALSE		FALSE
PRKAA1	FALSE		FALSE		FALSE		FALSE		FALSE
GTPBP6	FALSE		FALSE		FALSE		FALSE		FALSE
SRPK2	FALSE		FALSE		FALSE		FALSE		FALSE
MED8	FALSE		FALSE		FALSE		FALSE		FALSE
CD9	FALSE		FALSE		FALSE		FALSE		FALSE
LYRM7	FALSE		FALSE		FALSE		FALSE		FALSE
BECN1	FALSE		FALSE		FALSE		FALSE		FALSE
EXOSC9	FALSE		FALSE		FALSE		FALSE		FALSE
USP10	FALSE		FALSE		FALSE		FALSE		FALSE
SRSF2	FALSE		FALSE		FALSE		FALSE		FALSE
DDX6	FALSE		FALSE		FALSE		FALSE		FALSE
NELFE	TRUE		FALSE		FALSE		FALSE		FALSE
AKAP9	FALSE		FALSE		FALSE		FALSE		FALSE
IGBP1	FALSE		FALSE		FALSE		FALSE		FALSE
NIPSNAP2	FALSE		FALSE		FALSE		FALSE		FALSE
CPSF4	FALSE		FALSE		FALSE		FALSE		FALSE
CYBA	TRUE		FALSE		FALSE		FALSE		FALSE
JAM3	FALSE		FALSE		FALSE		FALSE		FALSE
STXBP3	FALSE		FALSE		FALSE		FALSE		FALSE
FLII	FALSE		FALSE		FALSE		FALSE		FALSE
RTRAF	FALSE		FALSE		FALSE		FALSE		FALSE
GLUD1	FALSE		FALSE		FALSE		FALSE		FALSE
PPAN	FALSE		FALSE		FALSE		FALSE		FALSE
NUP214	FALSE		FALSE		FALSE		FALSE		FALSE
RETREG3	FALSE		FALSE		FALSE		FALSE		FALSE
EPN2	FALSE		FALSE		FALSE		FALSE		FALSE
ARPC1B	FALSE		FALSE		FALSE		FALSE		FALSE
RTN3	FALSE		FALSE		FALSE		FALSE		FALSE
AGPAT3	FALSE		FALSE		FALSE		FALSE		FALSE
HSPA5	FALSE		FALSE		FALSE		FALSE		FALSE
GART	FALSE		FALSE		FALSE		FALSE		FALSE
THNSL1	FALSE		FALSE		FALSE		FALSE		FALSE
ZNF462	FALSE		FALSE		FALSE		FALSE		FALSE
CLINT1	FALSE		FALSE		FALSE		FALSE		FALSE
ZAR1	FALSE		FALSE		FALSE		FALSE		FALSE
MED27	FALSE		FALSE		FALSE		FALSE		FALSE
VPS53	FALSE		FALSE		FALSE		FALSE		FALSE
ACADVL	TRUE		FALSE		FALSE		FALSE		FALSE
GOLT1B	FALSE		FALSE		FALSE		FALSE		FALSE
PCYOX1	FALSE		FALSE		FALSE		FALSE		FALSE
GOLGB1	FALSE		FALSE		FALSE		FALSE		FALSE
PPHLN1	FALSE		FALSE		FALSE		FALSE		FALSE
CHD7	FALSE		FALSE		FALSE		FALSE		FALSE
PABPC1	FALSE		FALSE		FALSE		FALSE		FALSE
SLC25A25	FALSE		FALSE		FALSE		FALSE		FALSE
RAB3GAP2	FALSE		FALSE		FALSE		FALSE		FALSE
SDAD1	FALSE		FALSE		FALSE		FALSE		FALSE
TMOD1	FALSE		FALSE		FALSE		FALSE		FALSE
CAPZA2	FALSE		FALSE		FALSE		FALSE		FALSE
CAPZB	FALSE		FALSE		FALSE		FALSE		FALSE
CLUH	FALSE		FALSE		FALSE		FALSE		FALSE
SYNRG	FALSE		FALSE		FALSE		FALSE		FALSE
BZW2	FALSE		FALSE		FALSE		FALSE		FALSE
DRG1	FALSE		FALSE		FALSE		FALSE		FALSE
QARS1	FALSE		FALSE		FALSE		FALSE		FALSE
TCF25	FALSE		FALSE		FALSE		FALSE		FALSE
POLR2C	TRUE		FALSE		FALSE		FALSE		FALSE
SNTB2	FALSE		FALSE		FALSE		FALSE		FALSE
CTNNB1	FALSE		FALSE		FALSE		FALSE		FALSE
DHX37	FALSE		FALSE		FALSE		FALSE		FALSE
SNTB1	FALSE		FALSE		FALSE		FALSE		FALSE
FAM32A	FALSE		FALSE		FALSE		FALSE		FALSE
EXOC4	FALSE		FALSE		FALSE		FALSE		FALSE
HMGB1	FALSE		FALSE		FALSE		FALSE		FALSE
APOL2	FALSE		FALSE		FALSE		FALSE		FALSE
RPS27AP5	FALSE		FALSE		FALSE		FALSE		FALSE
BID	TRUE		FALSE		FALSE		FALSE		FALSE
SAR1B	FALSE		FALSE		FALSE		FALSE		FALSE
SRSF12	FALSE		FALSE		FALSE		FALSE		FALSE
ZC3H18	FALSE		FALSE		FALSE		FALSE		FALSE
ABCB7	FALSE		FALSE		FALSE		FALSE		FALSE
YIPF4	FALSE		FALSE		FALSE		FALSE		FALSE
SNX3	FALSE		FALSE		FALSE		FALSE		FALSE
SNRPF	TRUE		FALSE		FALSE		FALSE		FALSE
MAN2B1	FALSE		FALSE		FALSE		FALSE		FALSE
CHMP5	FALSE		FALSE		FALSE		FALSE		FALSE
ADPGK	FALSE		FALSE		FALSE		FALSE		FALSE
DDB1	FALSE		FALSE		FALSE		FALSE		FALSE
TRMT1	FALSE		FALSE		FALSE		FALSE		FALSE
PDXDC2P	FALSE		FALSE		FALSE		FALSE		FALSE
PABPC3	FALSE		FALSE		FALSE		FALSE		FALSE
UBE2Z	FALSE		FALSE		FALSE		FALSE		FALSE
FIS1	FALSE		FALSE		FALSE		FALSE		FALSE
SEC23A	FALSE		FALSE		FALSE		FALSE		FALSE
NUMB	FALSE		FALSE		FALSE		FALSE		FALSE
NUMB	FALSE		FALSE		FALSE		FALSE		FALSE
MAK16	FALSE		FALSE		FALSE		FALSE		FALSE
RPA1	FALSE		FALSE		FALSE		FALSE		FALSE
SH3BP4	FALSE		FALSE		FALSE		FALSE		FALSE
TTC19	FALSE		FALSE		FALSE		FALSE		FALSE
OSBPL9	FALSE		FALSE		FALSE		FALSE		FALSE
NUDT9	FALSE		FALSE		FALSE		FALSE		FALSE
MYH10	FALSE		FALSE		FALSE		FALSE		FALSE
ATP1B1	FALSE		FALSE		FALSE		FALSE		FALSE
ATAD1	FALSE		FALSE		FALSE		FALSE		FALSE
NUP88	FALSE		FALSE		FALSE		FALSE		FALSE
CWC15	FALSE		FALSE		FALSE		FALSE		FALSE
AP1G1	FALSE		FALSE		FALSE		FALSE		FALSE
ARMC10	FALSE		FALSE		FALSE		FALSE		FALSE
DDX3Y	FALSE		FALSE		FALSE		FALSE		FALSE
NKTR	FALSE		FALSE		FALSE		FALSE		FALSE
HMOX2	FALSE		FALSE		FALSE		FALSE		FALSE
ALB	FALSE		FALSE		FALSE		FALSE		FALSE
GHDC	FALSE		FALSE		FALSE		FALSE		FALSE
STARD7	TRUE		FALSE		FALSE		FALSE		FALSE
UTP18	FALSE		FALSE		FALSE		FALSE		FALSE
DHDDS	FALSE		FALSE		FALSE		FALSE		FALSE
NOM1	FALSE		FALSE		FALSE		FALSE		FALSE
GPAT3	FALSE		FALSE		FALSE		FALSE		FALSE
PARD3	FALSE		FALSE		FALSE		FALSE		FALSE
SPECC1L	FALSE		FALSE		FALSE		FALSE		FALSE
CHMP4B	FALSE		FALSE		FALSE		FALSE		FALSE
BAG6	FALSE		FALSE		FALSE		FALSE		FALSE
KIFBP	FALSE		FALSE		FALSE		FALSE		FALSE
FKBP8	FALSE		FALSE		FALSE		FALSE		FALSE
SPC24	FALSE		FALSE		FALSE		FALSE		FALSE
ZC3H4	FALSE		FALSE		FALSE		FALSE		FALSE
ZC3H4	FALSE		FALSE		FALSE		FALSE		FALSE
PRIM2	FALSE		FALSE		FALSE		FALSE		FALSE
POTEKP	FALSE		FALSE		FALSE		FALSE		FALSE
MRC2	FALSE		FALSE		FALSE		FALSE		FALSE
RPS27	TRUE		FALSE		FALSE		FALSE		FALSE
PCMT1	FALSE		FALSE		FALSE		FALSE		FALSE
SUV39H2	FALSE		FALSE		FALSE		FALSE		FALSE
RRP7A	FALSE		FALSE		FALSE		FALSE		FALSE
MICU1	FALSE		FALSE		FALSE		FALSE		FALSE
CCDC137	FALSE		FALSE		FALSE		FALSE		FALSE
ACTC1	FALSE		FALSE		FALSE		FALSE		FALSE
ACTA1	FALSE		FALSE		FALSE		FALSE		FALSE
ACTG1	FALSE		FALSE		FALSE		FALSE		FALSE
ACTB	FALSE		FALSE		FALSE		FALSE		FALSE
LSM4	TRUE		FALSE		FALSE		FALSE		FALSE
LSM4	TRUE		FALSE		FALSE		FALSE		FALSE
PEX3	FALSE		FALSE		FALSE		FALSE		FALSE
DSC3	FALSE		FALSE		FALSE		FALSE		FALSE
SLC12A7	FALSE		FALSE		FALSE		FALSE		FALSE
NIP7	FALSE		FALSE		FALSE		FALSE		FALSE
KIFC1	FALSE		FALSE		FALSE		FALSE		FALSE
ACTA2	FALSE		FALSE		FALSE		FALSE		FALSE
ACTG2	FALSE		FALSE		FALSE		FALSE		FALSE
NCDN	FALSE		FALSE		FALSE		FALSE		FALSE
OGT	FALSE		FALSE		FALSE		FALSE		FALSE
FAM83D	FALSE		FALSE		FALSE		FALSE		FALSE
C19orf53	FALSE		FALSE		FALSE		FALSE		FALSE
TOX4	FALSE		FALSE		FALSE		FALSE		FALSE
TOX	FALSE		FALSE		FALSE		FALSE		FALSE
TOX3	FALSE		FALSE		FALSE		FALSE		FALSE
MAN1B1	FALSE		FALSE		FALSE		FALSE		FALSE
SRGAP2	FALSE		FALSE		FALSE		FALSE		FALSE
STRAP	FALSE		FALSE		FALSE		FALSE		FALSE
NIPSNAP1	FALSE		FALSE		FALSE		FALSE		FALSE
RAB24	FALSE		FALSE		FALSE		FALSE		FALSE
GTF3C1	FALSE		FALSE		FALSE		FALSE		FALSE
RFX5	FALSE		FALSE		FALSE		FALSE		FALSE
SLC39A7	FALSE		FALSE		FALSE		FALSE		FALSE
MPHOSPH8	FALSE		FALSE		FALSE		FALSE		FALSE
PIK3C3	FALSE		FALSE		FALSE		FALSE		FALSE
FAM120A	FALSE		FALSE		FALSE		FALSE		FALSE
RRP7BP	FALSE		FALSE		FALSE		FALSE		FALSE
THBS1	FALSE		FALSE		FALSE		FALSE		FALSE
MDN1	FALSE		FALSE		FALSE		FALSE		FALSE
LRRC41	FALSE		FALSE		FALSE		FALSE		FALSE
PRPF4	FALSE		FALSE		FALSE		FALSE		FALSE
BAZ1A	FALSE		FALSE		FALSE		FALSE		FALSE
MGA	FALSE		FALSE		FALSE		FALSE		FALSE
ATXN2L	FALSE		FALSE		FALSE		FALSE		FALSE
STX7	FALSE		FALSE		FALSE		FALSE		FALSE
GLIPR2	FALSE		FALSE		FALSE		FALSE		FALSE
RPS27L	FALSE		FALSE		FALSE		FALSE		FALSE
RPL8	FALSE		FALSE		FALSE		FALSE		FALSE
GTPBP4	FALSE		FALSE		FALSE		FALSE		FALSE
TST	TRUE		FALSE		FALSE		FALSE		FALSE
SLIRP	FALSE		FALSE		FALSE		FALSE		FALSE
RPL37	FALSE		FALSE		FALSE		FALSE		FALSE
RPL11	TRUE		FALSE		FALSE		FALSE		FALSE
PARK7	TRUE		FALSE		FALSE		FALSE		FALSE
GIGYF2	FALSE		FALSE		FALSE		FALSE		FALSE
GTPBP3	FALSE		FALSE		FALSE		FALSE		FALSE
RAB11A	FALSE		FALSE		FALSE		FALSE		FALSE
RAB11B	FALSE		FALSE		FALSE		FALSE		FALSE
VDAC1	FALSE		FALSE		FALSE		FALSE		FALSE
PDLIM5	FALSE		FALSE		FALSE		FALSE		FALSE
ABCC1	FALSE		FALSE		FALSE		FALSE		FALSE
RAB5A	FALSE		FALSE		FALSE		FALSE		FALSE
TMF1	FALSE		FALSE		FALSE		FALSE		FALSE
TMEM87A	FALSE		FALSE		FALSE		FALSE		FALSE
BANF1	FALSE		FALSE		FALSE		FALSE		FALSE
NSMCE2	FALSE		FALSE		FALSE		FALSE		FALSE
G3BP1	FALSE		FALSE		FALSE		FALSE		FALSE
PABPC1L	FALSE		FALSE		FALSE		FALSE		FALSE
DHX38	FALSE		FALSE		FALSE		FALSE		FALSE
PPP1R10	FALSE		FALSE		FALSE		FALSE		FALSE
TMX4	FALSE		FALSE		FALSE		FALSE		FALSE
GPATCH8	FALSE		FALSE		FALSE		FALSE		FALSE
ACSL3	FALSE		FALSE		FALSE		FALSE		FALSE
VPS52	FALSE		FALSE		FALSE		FALSE		FALSE
SHMT2	TRUE		FALSE		FALSE		FALSE		FALSE
PHF3	FALSE		FALSE		FALSE		FALSE		FALSE
KIAA0754	FALSE		FALSE		FALSE		FALSE		FALSE
CLPX	FALSE		FALSE		FALSE		FALSE		FALSE
EXOC8	FALSE		FALSE		FALSE		FALSE		FALSE
DYNLL1	TRUE		FALSE		FALSE		FALSE		FALSE
SLC19A1	TRUE		FALSE		FALSE		FALSE		FALSE
SNW1	FALSE		FALSE		FALSE		FALSE		FALSE
ITGA5	FALSE		FALSE		FALSE		FALSE		FALSE
EMSY	FALSE		FALSE		FALSE		FALSE		FALSE
MGST3	TRUE		FALSE		FALSE		FALSE		FALSE
PHF5A	FALSE		FALSE		FALSE		FALSE		FALSE
TOM1L2	FALSE		FALSE		FALSE		FALSE		FALSE
MED22	FALSE		FALSE		FALSE		FALSE		FALSE
NPAT	FALSE		FALSE		FALSE		FALSE		FALSE
NFIA	FALSE		FALSE		FALSE		FALSE		FALSE
ITPR2	FALSE		FALSE		FALSE		FALSE		FALSE
VEZF1	FALSE		FALSE		FALSE		FALSE		FALSE
SUPT20H	FALSE		FALSE		FALSE		FALSE		FALSE
SETD2	FALSE		FALSE		FALSE		FALSE		FALSE
CENPF	FALSE		FALSE		FALSE		FALSE		FALSE
FCF1	FALSE		FALSE		FALSE		FALSE		FALSE
PPIL4	FALSE		FALSE		FALSE		FALSE		FALSE
G3BP2	FALSE		FALSE		FALSE		FALSE		FALSE
PHB	TRUE		FALSE		FALSE		FALSE		FALSE
NUP210	FALSE		FALSE		FALSE		FALSE		FALSE
MACROH2A1	FALSE		FALSE		FALSE		FALSE		FALSE
ESF1	FALSE		FALSE		FALSE		FALSE		FALSE
SRPK3	FALSE		FALSE		FALSE		FALSE		FALSE
TDRKH	FALSE		FALSE		FALSE		FALSE		FALSE
HIP1R	FALSE		FALSE		FALSE		FALSE		FALSE
COASY	FALSE		FALSE		FALSE		FALSE		FALSE
NUP93	FALSE		FALSE		FALSE		FALSE		FALSE
NCBP1	FALSE		FALSE		FALSE		FALSE		FALSE
MGST2	FALSE		FALSE		FALSE		FALSE		FALSE
ALYREF	FALSE		FALSE		FALSE		FALSE		FALSE
TIMELESS	FALSE		FALSE		FALSE		FALSE		FALSE
MKRN2	FALSE		FALSE		FALSE		FALSE		FALSE
RPS10P5	FALSE		FALSE		FALSE		FALSE		FALSE
DDX47	FALSE		FALSE		FALSE		FALSE		FALSE
ATP6V1C1	FALSE		FALSE		FALSE		FALSE		FALSE
OXSR1	FALSE		FALSE		FALSE		FALSE		FALSE
GEMIN4	FALSE		FALSE		FALSE		FALSE		FALSE
WDR3	FALSE		FALSE		FALSE		FALSE		FALSE
MAOA	FALSE		FALSE		FALSE		FALSE		FALSE
SMCHD1	FALSE		FALSE		FALSE		FALSE		FALSE
BPNT2	FALSE		FALSE		FALSE		FALSE		FALSE
ARL8B	FALSE		FALSE		FALSE		FALSE		FALSE
NECTIN2	FALSE		FALSE		FALSE		FALSE		FALSE
PRPF38A	FALSE		FALSE		FALSE		FALSE		FALSE
BYSL	FALSE		FALSE		FALSE		FALSE		FALSE
SAMM50	FALSE		FALSE		FALSE		FALSE		FALSE
SMC2	FALSE		FALSE		FALSE		FALSE		FALSE
VPS51	FALSE		FALSE		FALSE		FALSE		FALSE
FUNDC2	TRUE		FALSE		FALSE		FALSE		FALSE
U2AF1	FALSE		FALSE		FALSE		FALSE		FALSE
U2AF1L5	FALSE		FALSE		FALSE		FALSE		FALSE
CDK5RAP2	FALSE		FALSE		FALSE		FALSE		FALSE
PNO1	FALSE		FALSE		FALSE		FALSE		FALSE
ATP6V1G1	FALSE		FALSE		FALSE		FALSE		FALSE
KIAA1671	FALSE		FALSE		FALSE		FALSE		FALSE
MED6	FALSE		FALSE		FALSE		FALSE		FALSE
DDX4	FALSE		FALSE		FALSE		FALSE		FALSE
DNTTIP2	FALSE		FALSE		FALSE		FALSE		FALSE
DDX54	FALSE		FALSE		FALSE		FALSE		FALSE
MATR3	FALSE		FALSE		FALSE		FALSE		FALSE
SF3A2	FALSE		FALSE		FALSE		FALSE		FALSE
HSP90AA2P	FALSE		FALSE		FALSE		FALSE		FALSE
LRRC8A	FALSE		FALSE		FALSE		FALSE		FALSE
RPS12	FALSE		FALSE		FALSE		FALSE		FALSE
GPATCH4	FALSE		FALSE		FALSE		FALSE		FALSE
ATP2A1	FALSE		FALSE		FALSE		FALSE		FALSE
DIAPH1	FALSE		FALSE		FALSE		FALSE		FALSE
PLOD3	FALSE		FALSE		FALSE		FALSE		FALSE
NBAS	FALSE		FALSE		FALSE		FALSE		FALSE
GFM1	FALSE		FALSE		FALSE		FALSE		FALSE
SNRPE	TRUE		FALSE		FALSE		FALSE		FALSE
ATPAF1	FALSE		FALSE		FALSE		FALSE		FALSE
IK	FALSE		FALSE		FALSE		FALSE		FALSE
RAD23B	FALSE		FALSE		FALSE		FALSE		FALSE
UBN1	FALSE		FALSE		FALSE		FALSE		FALSE
CENPU	FALSE		FALSE		FALSE		FALSE		FALSE
TTF1	FALSE		FALSE		FALSE		FALSE		FALSE
HK1	FALSE		FALSE		FALSE		FALSE		FALSE
RCN2	FALSE		FALSE		FALSE		FALSE		FALSE
RADX	FALSE		FALSE		FALSE		FALSE		FALSE
RPL7	FALSE		FALSE		FALSE		FALSE		FALSE
ACTBL2	FALSE		FALSE		FALSE		FALSE		FALSE
TMEM199	FALSE		FALSE		FALSE		FALSE		FALSE
GCN1	FALSE		FALSE		FALSE		FALSE		FALSE
CPT2	FALSE		FALSE		FALSE		FALSE		FALSE
NGDN	FALSE		FALSE		FALSE		FALSE		FALSE
PKD2	FALSE		FALSE		FALSE		FALSE		FALSE
ANKRD11	FALSE		FALSE		FALSE		FALSE		FALSE
TMEM115	FALSE		FALSE		FALSE		FALSE		FALSE
GLE1	FALSE		FALSE		FALSE		FALSE		FALSE
SCCPDH	FALSE		FALSE		FALSE		FALSE		FALSE
TCERG1	FALSE		FALSE		FALSE		FALSE		FALSE
TNIK	FALSE		FALSE		FALSE		FALSE		FALSE
MINK1	FALSE		FALSE		FALSE		FALSE		FALSE
PAK1IP1	FALSE		FALSE		FALSE		FALSE		FALSE
UTP14C	FALSE		FALSE		FALSE		FALSE		FALSE
EHMT1	FALSE		FALSE		FALSE		FALSE		FALSE
UTP6	FALSE		FALSE		FALSE		FALSE		FALSE
TNPO1	FALSE		FALSE		FALSE		FALSE		FALSE
ANXA7	FALSE		FALSE		FALSE		FALSE		FALSE
TEX2	FALSE		FALSE		FALSE		FALSE		FALSE
XAB2	FALSE		FALSE		FALSE		FALSE		FALSE
CRNKL1	FALSE		FALSE		FALSE		FALSE		FALSE
ZC3H13	FALSE		FALSE		FALSE		FALSE		FALSE
PPP1R9A	FALSE		FALSE		FALSE		FALSE		FALSE
PRC1	FALSE		FALSE		FALSE		FALSE		FALSE
SEC11B	FALSE		FALSE		FALSE		FALSE		FALSE
ISY1	FALSE		FALSE		FALSE		FALSE		FALSE
LUZP1	FALSE		FALSE		FALSE		FALSE		FALSE
DPM3	TRUE		FALSE		FALSE		FALSE		FALSE
PHB2	TRUE		FALSE		FALSE		FALSE		FALSE
HECTD1	FALSE		FALSE		FALSE		FALSE		FALSE
RPL32	FALSE		FALSE		FALSE		FALSE		FALSE
BCLAF1	FALSE		FALSE		FALSE		FALSE		FALSE
RAI14	FALSE		FALSE		FALSE		FALSE		FALSE
SRP68	FALSE		FALSE		FALSE		FALSE		FALSE
TFIP11	FALSE		FALSE		FALSE		FALSE		FALSE
ACOT9	FALSE		FALSE		FALSE		FALSE		FALSE
APOO	FALSE		FALSE		FALSE		FALSE		FALSE
NVL	FALSE		FALSE		FALSE		FALSE		FALSE
RPL14	FALSE		FALSE		FALSE		FALSE		FALSE
VPS72	FALSE		FALSE		FALSE		FALSE		FALSE
TMEM192	FALSE		FALSE		FALSE		FALSE		FALSE
DMD	FALSE		FALSE		FALSE		FALSE		FALSE
VTI1A	FALSE		FALSE		FALSE		FALSE		FALSE
UTP14A	FALSE		FALSE		FALSE		FALSE		FALSE
MYO18A	FALSE		FALSE		FALSE		FALSE		FALSE
NTPCR	FALSE		FALSE		FALSE		FALSE		FALSE
CDCA2	FALSE		FALSE		FALSE		FALSE		FALSE
RAB5B	FALSE		FALSE		FALSE		FALSE		FALSE
IMP3	FALSE		FALSE		FALSE		FALSE		FALSE
NUP188	FALSE		FALSE		FALSE		FALSE		FALSE
SF3B2	FALSE		FALSE		FALSE		FALSE		FALSE
DNAJC9	FALSE		FALSE		FALSE		FALSE		FALSE
EXOC5	FALSE		FALSE		FALSE		FALSE		FALSE
NDRG1	FALSE		FALSE		FALSE		FALSE		FALSE
PINX1	FALSE		FALSE		FALSE		FALSE		FALSE
XPC	FALSE		FALSE		FALSE		FALSE		FALSE
UCHL1	TRUE		FALSE		FALSE		FALSE		FALSE
NR2F2	FALSE		FALSE		FALSE		FALSE		FALSE
IBA57	FALSE		FALSE		FALSE		FALSE		FALSE
ASPH	FALSE		FALSE		FALSE		FALSE		FALSE
ARL6IP1	FALSE		FALSE		FALSE		FALSE		FALSE
APOE	FALSE		FALSE		FALSE		FALSE		FALSE
PTDSS1	FALSE		FALSE		FALSE		FALSE		FALSE
DBT	FALSE		FALSE		FALSE		FALSE		FALSE
TGOLN2	FALSE		FALSE		FALSE		FALSE		FALSE
PRPF31	FALSE		FALSE		FALSE		FALSE		FALSE
MTDH	FALSE		FALSE		FALSE		FALSE		FALSE
BUB3	FALSE		FALSE		FALSE		FALSE		FALSE
B3GALT6	FALSE		FALSE		FALSE		FALSE		FALSE
ARL6IP4	FALSE		FALSE		FALSE		FALSE		FALSE
SEC11A	FALSE		FALSE		FALSE		FALSE		FALSE
ZNF106	FALSE		FALSE		FALSE		FALSE		FALSE
TRAPPC3	FALSE		FALSE		FALSE		FALSE		FALSE
ZNF207	FALSE		FALSE		FALSE		FALSE		FALSE
MAP4K4	FALSE		FALSE		FALSE		FALSE		FALSE
ACLY	FALSE		FALSE		FALSE		FALSE		FALSE
UGGT1	FALSE		FALSE		FALSE		FALSE		FALSE
DCAF13	FALSE		FALSE		FALSE		FALSE		FALSE
SURF6	FALSE		FALSE		FALSE		FALSE		FALSE
MFF	FALSE		FALSE		FALSE		FALSE		FALSE
AATF	FALSE		FALSE		FALSE		FALSE		FALSE
SF3B1	FALSE		FALSE		FALSE		FALSE		FALSE
CDC73	FALSE		FALSE		FALSE		FALSE		FALSE
SF3B4	FALSE		FALSE		FALSE		FALSE		FALSE
CACFD1	FALSE		FALSE		FALSE		FALSE		FALSE
SF3A1	FALSE		FALSE		FALSE		FALSE		FALSE
RFX1	FALSE		FALSE		FALSE		FALSE		FALSE
ECHS1	FALSE		FALSE		FALSE		FALSE		FALSE
CHID1	FALSE		FALSE		FALSE		FALSE		FALSE
VDAC2	TRUE		FALSE		FALSE		FALSE		FALSE
BAIAP2L1	FALSE		FALSE		FALSE		FALSE		FALSE
STX3	FALSE		FALSE		FALSE		FALSE		FALSE
HSP90AA1	FALSE		FALSE		FALSE		FALSE		FALSE
MAPRE1	FALSE		FALSE		FALSE		FALSE		FALSE
PRR11	FALSE		FALSE		FALSE		FALSE		FALSE
AIDA	FALSE		FALSE		FALSE		FALSE		FALSE
BEND3	FALSE		FALSE		FALSE		FALSE		FALSE
CTCF	FALSE		FALSE		FALSE		FALSE		FALSE
VARS2	FALSE		FALSE		FALSE		FALSE		FALSE
CCDC6	FALSE		FALSE		FALSE		FALSE		FALSE
NACA	FALSE		FALSE		FALSE		FALSE		FALSE
LAP3	FALSE		FALSE		FALSE		FALSE		FALSE
DHX9	FALSE		FALSE		FALSE		FALSE		FALSE
MPP5	FALSE		FALSE		FALSE		FALSE		FALSE
LEMD3	FALSE		FALSE		FALSE		FALSE		FALSE
ARFGAP2	FALSE		FALSE		FALSE		FALSE		FALSE
SMU1	FALSE		FALSE		FALSE		FALSE		FALSE
CTNNA1	FALSE		FALSE		FALSE		FALSE		FALSE
DDX49	TRUE		FALSE		FALSE		FALSE		FALSE
CBX1	FALSE		FALSE		FALSE		FALSE		FALSE
RRP8	FALSE		FALSE		FALSE		FALSE		FALSE
EIF2S1	FALSE		FALSE		FALSE		FALSE		FALSE
EIF2B2	FALSE		FALSE		FALSE		FALSE		FALSE
GLS	FALSE		FALSE		FALSE		FALSE		FALSE
BRCA1	FALSE		FALSE		FALSE		FALSE		FALSE
TNFRSF10A	FALSE		FALSE		FALSE		FALSE		FALSE
ERC1	FALSE		FALSE		FALSE		FALSE		FALSE
IGF2BP1	FALSE		FALSE		FALSE		FALSE		FALSE
EPB41L3	FALSE		FALSE		FALSE		FALSE		FALSE
SAR1A	FALSE		FALSE		FALSE		FALSE		FALSE
HGS	FALSE		FALSE		FALSE		FALSE		FALSE
VARS2	FALSE		FALSE		FALSE		FALSE		FALSE
VARS2	FALSE		FALSE		FALSE		FALSE		FALSE
VARS2	FALSE		FALSE		FALSE		FALSE		FALSE
VARS2	FALSE		FALSE		FALSE		FALSE		FALSE
NIPBL	FALSE		FALSE		FALSE		FALSE		FALSE
YIPF6	FALSE		FALSE		FALSE		FALSE		FALSE
AHCYL1	FALSE		FALSE		FALSE		FALSE		FALSE
HSD17B4	FALSE		FALSE		FALSE		FALSE		FALSE
PRRC2C	FALSE		FALSE		FALSE		FALSE		FALSE
RUFY1	FALSE		FALSE		FALSE		FALSE		FALSE
PPP4R1	FALSE		FALSE		FALSE		FALSE		FALSE
EXOC2	FALSE		FALSE		FALSE		FALSE		FALSE
THRAP3	FALSE		FALSE		FALSE		FALSE		FALSE
PRRC2B	FALSE		FALSE		FALSE		FALSE		FALSE
HERC2	FALSE		FALSE		FALSE		FALSE		FALSE
NENF	TRUE		FALSE		FALSE		FALSE		FALSE
GPKOW	FALSE		FALSE		FALSE		FALSE		FALSE
HCK	FALSE		FALSE		FALSE		FALSE		FALSE
PLAA	FALSE		FALSE		FALSE		FALSE		FALSE
LTV1	FALSE		FALSE		FALSE		FALSE		FALSE
SCP2	FALSE		FALSE		FALSE		FALSE		FALSE
TRAPPC13	FALSE		FALSE		FALSE		FALSE		FALSE
ADAM9	FALSE		FALSE		FALSE		FALSE		FALSE
REEP4	TRUE		FALSE		FALSE		FALSE		FALSE
DYNLL2	FALSE		FALSE		FALSE		FALSE		FALSE
RPL15	FALSE		FALSE		FALSE		FALSE		FALSE
ALDH3A2	FALSE		FALSE		FALSE		FALSE		FALSE
RHOT1	FALSE		FALSE		FALSE		FALSE		FALSE
KAT6A	FALSE		FALSE		FALSE		FALSE		FALSE
NSUN2	FALSE		FALSE		FALSE		FALSE		FALSE
NOLC1	FALSE		FALSE		FALSE		FALSE		FALSE
PYM1	FALSE		FALSE		FALSE		FALSE		FALSE
UBIAD1	FALSE		FALSE		FALSE		FALSE		FALSE
ATP2A2	FALSE		FALSE		FALSE		FALSE		FALSE
RNF5	TRUE		FALSE		FALSE		FALSE		FALSE
CUL4B	FALSE		FALSE		FALSE		FALSE		FALSE
PRRC2A	FALSE		FALSE		FALSE		FALSE		FALSE
STX6	FALSE		FALSE		FALSE		FALSE		FALSE
DDX46	FALSE		FALSE		FALSE		FALSE		FALSE
PES1	TRUE		FALSE		FALSE		FALSE		FALSE
NAPG	FALSE		FALSE		FALSE		FALSE		FALSE
BCAS2	FALSE		FALSE		FALSE		FALSE		FALSE
AQR	FALSE		FALSE		FALSE		FALSE		FALSE
LRPPRC	FALSE		FALSE		FALSE		FALSE		FALSE
SON	FALSE		FALSE		FALSE		FALSE		FALSE
HNRNPAB	FALSE		FALSE		FALSE		FALSE		FALSE
DDX41	FALSE		FALSE		FALSE		FALSE		FALSE
RPL10A	FALSE		FALSE		FALSE		FALSE		FALSE
CLTA	TRUE		FALSE		FALSE		FALSE		FALSE
RPS25	FALSE		FALSE		FALSE		FALSE		FALSE
L2HGDH	FALSE		FALSE		FALSE		FALSE		FALSE
CDK1	FALSE		FALSE		FALSE		FALSE		FALSE
DNAJB11	FALSE		FALSE		FALSE		FALSE		FALSE
RPL13A	FALSE		FALSE		FALSE		FALSE		FALSE
MLEC	FALSE		FALSE		FALSE		FALSE		FALSE
DNAAF5	FALSE		FALSE		FALSE		FALSE		FALSE
WDR74	FALSE		FALSE		FALSE		FALSE		FALSE
UTP20	FALSE		FALSE		FALSE		FALSE		FALSE
CWC25	FALSE		FALSE		FALSE		FALSE		FALSE
PAXBP1	FALSE		FALSE		FALSE		FALSE		FALSE
AP3B1	FALSE		FALSE		FALSE		FALSE		FALSE
RBM8A	FALSE		FALSE		FALSE		FALSE		FALSE
GGA1	FALSE		FALSE		FALSE		FALSE		FALSE
MYO1D	FALSE		FALSE		FALSE		FALSE		FALSE
LSM2	TRUE		FALSE		FALSE		FALSE		FALSE
RPL4	FALSE		FALSE		FALSE		FALSE		FALSE
USP33	FALSE		FALSE		FALSE		FALSE		FALSE
C1orf131	FALSE		FALSE		FALSE		FALSE		FALSE
OXCT1	FALSE		FALSE		FALSE		FALSE		FALSE
TRIP12	FALSE		FALSE		FALSE		FALSE		FALSE
RPS4Y1	FALSE		FALSE		FALSE		FALSE		FALSE
LEO1	FALSE		FALSE		FALSE		FALSE		FALSE
CSTF2T	FALSE		FALSE		FALSE		FALSE		FALSE
RPL34	TRUE		FALSE		FALSE		FALSE		FALSE
MARK2	FALSE		FALSE		FALSE		FALSE		FALSE
RPL18A	FALSE		FALSE		FALSE		FALSE		FALSE
RPL17	FALSE		FALSE		FALSE		FALSE		FALSE
CSTF2	FALSE		FALSE		FALSE		FALSE		FALSE
SNX6	FALSE		FALSE		FALSE		FALSE		FALSE
YEATS4	FALSE		FALSE		FALSE		FALSE		FALSE
DCTN2	FALSE		FALSE		FALSE		FALSE		FALSE
SPATA5	FALSE		FALSE		FALSE		FALSE		FALSE
RPF1	FALSE		FALSE		FALSE		FALSE		FALSE
MSH3	FALSE		FALSE		FALSE		FALSE		FALSE
HSP90AB1	FALSE		FALSE		FALSE		FALSE		FALSE
SSR4	TRUE		FALSE		FALSE		FALSE		FALSE
H1-10	FALSE		FALSE		FALSE		FALSE		FALSE
PPWD1	FALSE		FALSE		FALSE		FALSE		FALSE
ANO10	FALSE		FALSE		FALSE		FALSE		FALSE
MYO1C	FALSE		FALSE		FALSE		FALSE		FALSE
C1orf112	FALSE		FALSE		FALSE		FALSE		FALSE
NUP42	FALSE		FALSE		FALSE		FALSE		FALSE
NT5C3A	FALSE		FALSE		FALSE		FALSE		FALSE
PWP1	FALSE		FALSE		FALSE		FALSE		FALSE
PABPN1	FALSE		FALSE		FALSE		FALSE		FALSE
RALA	FALSE		FALSE		FALSE		FALSE		FALSE
CCDC47	FALSE		FALSE		FALSE		FALSE		FALSE
GCDH	FALSE		FALSE		FALSE		FALSE		FALSE
ABCD3	FALSE		FALSE		FALSE		FALSE		FALSE
TCOF1	FALSE		FALSE		FALSE		FALSE		FALSE
FUNDC1	FALSE		FALSE		FALSE		FALSE		FALSE
KIAA2013	FALSE		FALSE		FALSE		FALSE		FALSE
NSD1	FALSE		FALSE		FALSE		FALSE		FALSE
SLC38A2	FALSE		FALSE		FALSE		FALSE		FALSE
ECSIT	FALSE		FALSE		FALSE		FALSE		FALSE
DDX31	FALSE		FALSE		FALSE		FALSE		FALSE
NELFB	FALSE		FALSE		FALSE		FALSE		FALSE
ATP2B3	FALSE		FALSE		FALSE		FALSE		FALSE
RPL13	FALSE		FALSE		FALSE		FALSE		FALSE
SYNE1	FALSE		FALSE		FALSE		FALSE		FALSE
RPS18	FALSE		FALSE		FALSE		FALSE		FALSE
GGCX	FALSE		FALSE		FALSE		FALSE		FALSE
TAB2	FALSE		FALSE		FALSE		FALSE		FALSE
SIN3A	FALSE		FALSE		FALSE		FALSE		FALSE
C7orf50	FALSE		FALSE		FALSE		FALSE		FALSE
ZMYM2	FALSE		FALSE		FALSE		FALSE		FALSE
ATP2B2	FALSE		FALSE		FALSE		FALSE		FALSE
GTF3C3	FALSE		FALSE		FALSE		FALSE		FALSE
FLVCR1	FALSE		FALSE		FALSE		FALSE		FALSE
TBC1D9B	FALSE		FALSE		FALSE		FALSE		FALSE
DLAT	FALSE		FALSE		FALSE		FALSE		FALSE
EMG1	FALSE		FALSE		FALSE		FALSE		FALSE
FBL	FALSE		FALSE		FALSE		FALSE		FALSE
RPL13AP3	FALSE		FALSE		FALSE		FALSE		FALSE
ATP2B4	FALSE		FALSE		FALSE		FALSE		FALSE
LYAR	FALSE		FALSE		FALSE		FALSE		FALSE
COG4	FALSE		FALSE		FALSE		FALSE		FALSE
TAOK1	FALSE		FALSE		FALSE		FALSE		FALSE
RCN1	FALSE		FALSE		FALSE		FALSE		FALSE
RPL6	FALSE		FALSE		FALSE		FALSE		FALSE
TERF2	FALSE		FALSE		FALSE		FALSE		FALSE
TNPO2	FALSE		FALSE		FALSE		FALSE		FALSE
MACROH2A2	FALSE		FALSE		FALSE		FALSE		FALSE
DDOST	TRUE		FALSE		FALSE		FALSE		FALSE
SRPK1	FALSE		FALSE		FALSE		FALSE		FALSE
COIL	FALSE		FALSE		FALSE		FALSE		FALSE
SEC23IP	FALSE		FALSE		FALSE		FALSE		FALSE
SEC22B	FALSE		FALSE		FALSE		FALSE		FALSE
RPS8	TRUE		FALSE		FALSE		FALSE		FALSE
DDX19B	FALSE		FALSE		FALSE		FALSE		FALSE
PDP1	FALSE		FALSE		FALSE		FALSE		FALSE
RAB11FIP2	FALSE		FALSE		FALSE		FALSE		FALSE
MTARC2	FALSE		FALSE		FALSE		FALSE		FALSE
SUCLG1	FALSE		FALSE		FALSE		FALSE		FALSE
SF3A3	FALSE		FALSE		FALSE		FALSE		FALSE
MED15	FALSE		FALSE		FALSE		FALSE		FALSE
RPL6	FALSE		FALSE		FALSE		FALSE		FALSE
SOAT1	FALSE		FALSE		FALSE		FALSE		FALSE
GAK	FALSE		FALSE		FALSE		FALSE		FALSE
NSDHL	TRUE		FALSE		FALSE		FALSE		FALSE
PSME3	FALSE		FALSE		FALSE		FALSE		FALSE
MPDZ	FALSE		FALSE		FALSE		FALSE		FALSE
PCCB	FALSE		FALSE		FALSE		FALSE		FALSE
RPL3L	FALSE		FALSE		FALSE		FALSE		FALSE
ATXN2	FALSE		FALSE		FALSE		FALSE		FALSE
NR2F6	FALSE		FALSE		FALSE		FALSE		FALSE
SHMT1	FALSE		FALSE		FALSE		FALSE		FALSE
CTNND1	FALSE		FALSE		FALSE		FALSE		FALSE
TBP	FALSE		FALSE		FALSE		FALSE		FALSE
RPL5	FALSE		FALSE		FALSE		FALSE		FALSE
RPL9	FALSE		FALSE		FALSE		FALSE		FALSE
AHCYL2	FALSE		FALSE		FALSE		FALSE		FALSE
ATP2A3	FALSE		FALSE		FALSE		FALSE		FALSE
HSPD1	FALSE		FALSE		FALSE		FALSE		FALSE
CNOT7	FALSE		FALSE		FALSE		FALSE		FALSE
RPS15A	TRUE		FALSE		FALSE		FALSE		FALSE
EXOC1	FALSE		FALSE		FALSE		FALSE		FALSE
CHD1	FALSE		FALSE		FALSE		FALSE		FALSE
SMIM13	FALSE		FALSE		FALSE		FALSE		FALSE
SLC30A9	FALSE		FALSE		FALSE		FALSE		FALSE
CDCA7L	FALSE		FALSE		FALSE		FALSE		FALSE
KPNA2	FALSE		FALSE		FALSE		FALSE		FALSE
RPS3A	FALSE		FALSE		FALSE		FALSE		FALSE
SLC9A3R2	FALSE		FALSE		FALSE		FALSE		FALSE
ARL8A	FALSE		FALSE		FALSE		FALSE		FALSE
RPL36	TRUE		FALSE		FALSE		FALSE		FALSE
NDUFAF1	FALSE		FALSE		FALSE		FALSE		FALSE
CTSC	FALSE		FALSE		FALSE		FALSE		FALSE
HMGN3	FALSE		FALSE		FALSE		FALSE		FALSE
GNL3	FALSE		FALSE		FALSE		FALSE		FALSE
YLPM1	FALSE		FALSE		FALSE		FALSE		FALSE
STX12	FALSE		FALSE		FALSE		FALSE		FALSE
RPS10	FALSE		FALSE		FALSE		FALSE		FALSE
PABPC1L2A	FALSE		FALSE		FALSE		FALSE		FALSE
IMP4	FALSE		FALSE		FALSE		FALSE		FALSE
GID8	FALSE		FALSE		FALSE		FALSE		FALSE
DGKE	FALSE		FALSE		FALSE		FALSE		FALSE
GNL1	FALSE		FALSE		FALSE		FALSE		FALSE
SNRPG	FALSE		FALSE		FALSE		FALSE		FALSE
EDC3	FALSE		FALSE		FALSE		FALSE		FALSE
SLC25A1	TRUE		FALSE		FALSE		FALSE		FALSE
SSB	FALSE		FALSE		FALSE		FALSE		FALSE
TP53BP2	FALSE		FALSE		FALSE		FALSE		FALSE
SNRPGP15	FALSE		FALSE		FALSE		FALSE		FALSE
FAM136A	FALSE		FALSE		FALSE		FALSE		FALSE
BCAP29	FALSE		FALSE		FALSE		FALSE		FALSE
RPL35	FALSE		FALSE		FALSE		FALSE		FALSE
RPAP3	FALSE		FALSE		FALSE		FALSE		FALSE
CERS5	FALSE		FALSE		FALSE		FALSE		FALSE
KIF5C	TRUE		FALSE		FALSE		FALSE		FALSE
DPM1	FALSE		FALSE		FALSE		FALSE		FALSE
ACSF2	FALSE		FALSE		FALSE		FALSE		FALSE
PRPSAP2	FALSE		FALSE		FALSE		FALSE		FALSE
NOC4L	FALSE		FALSE		FALSE		FALSE		FALSE
BET1	FALSE		FALSE		FALSE		FALSE		FALSE
MYDGF	FALSE		FALSE		FALSE		FALSE		FALSE
FAM114A1	FALSE		FALSE		FALSE		FALSE		FALSE
SMPD4	FALSE		FALSE		FALSE		FALSE		FALSE
TRIP4	FALSE		FALSE		FALSE		FALSE		FALSE
JUN	FALSE		FALSE		FALSE		FALSE		FALSE
CDKN2AIP	FALSE		FALSE		FALSE		FALSE		FALSE
SPCS2	FALSE		FALSE		FALSE		FALSE		FALSE
TRMT112	TRUE		FALSE		FALSE		FALSE		FALSE
ACAA1	FALSE		FALSE		FALSE		FALSE		FALSE
EIF2B1	FALSE		FALSE		FALSE		FALSE		FALSE
MOV10	FALSE		FALSE		FALSE		FALSE		FALSE
PRKRIP1	FALSE		FALSE		FALSE		FALSE		FALSE
CIAPIN1	FALSE		FALSE		FALSE		FALSE		FALSE
INCENP	FALSE		FALSE		FALSE		FALSE		FALSE
SGO2	FALSE		FALSE		FALSE		FALSE		FALSE
RPS2	FALSE		FALSE		FALSE		FALSE		FALSE
NOP56	FALSE		FALSE		FALSE		FALSE		FALSE
RAB11FIP1	FALSE		FALSE		FALSE		FALSE		FALSE
TMEM30A	FALSE		FALSE		FALSE		FALSE		FALSE
MORC2	FALSE		FALSE		FALSE		FALSE		FALSE
RPL23	FALSE		FALSE		FALSE		FALSE		FALSE
EIF2S2	FALSE		FALSE		FALSE		FALSE		FALSE
NOP58	FALSE		FALSE		FALSE		FALSE		FALSE
TMEM126B	FALSE		FALSE		FALSE		FALSE		FALSE
MPP6	FALSE		FALSE		FALSE		FALSE		FALSE
CACTIN	FALSE		FALSE		FALSE		FALSE		FALSE
CENPE	FALSE		FALSE		FALSE		FALSE		FALSE
YBX3	FALSE		FALSE		FALSE		FALSE		FALSE
RPL37AP8	FALSE		FALSE		FALSE		FALSE		FALSE
NDC1	FALSE		FALSE		FALSE		FALSE		FALSE
DIDO1	FALSE		FALSE		FALSE		FALSE		FALSE
COPG2	FALSE		FALSE		FALSE		FALSE		FALSE
HSP90AB2P	FALSE		FALSE		FALSE		FALSE		FALSE
TMEM11	FALSE		FALSE		FALSE		FALSE		FALSE
UBXN4	FALSE		FALSE		FALSE		FALSE		FALSE
H2BC13	FALSE		FALSE		FALSE		FALSE		FALSE
DIABLO	TRUE		FALSE		FALSE		FALSE		FALSE
NOL10	FALSE		FALSE		FALSE		FALSE		FALSE
PIN4	FALSE		FALSE		FALSE		FALSE		FALSE
SPTY2D1	FALSE		FALSE		FALSE		FALSE		FALSE
KIF5A	FALSE		FALSE		FALSE		FALSE		FALSE
FDPS	FALSE		FALSE		FALSE		FALSE		FALSE
H2BC1	FALSE		FALSE		FALSE		FALSE		FALSE
ECI1	FALSE		FALSE		FALSE		FALSE		FALSE
GTF3C5	FALSE		FALSE		FALSE		FALSE		FALSE
LRCH2	FALSE		FALSE		FALSE		FALSE		FALSE
CTR9	FALSE		FALSE		FALSE		FALSE		FALSE
NOL7	FALSE		FALSE		FALSE		FALSE		FALSE
GLYR1	FALSE		FALSE		FALSE		FALSE		FALSE
DDX21	FALSE		FALSE		FALSE		FALSE		FALSE
LENG8	FALSE		FALSE		FALSE		FALSE		FALSE
FAF2	FALSE		FALSE		FALSE		FALSE		FALSE
MYEF2	FALSE		FALSE		FALSE		FALSE		FALSE
[truncated: 1,920 more rows]

## Sheet: WCE_TMT
Gene list background (All proteins detected in WCE TMT)	All proteins detected in WCE TMT-LARP4_target	l2fc(WCE_KO:WT) < neg 0.2 (Down) and p-value <0.05	l2fc(WCE_KO:WT) < neg 0.2 (Down)-LARP4_target	l2fc(WCE_KO:WT) > pos 0.2 (Up) and p-value <0.05	l2fc(WCE_KO:WT) > pos 0.2 (Up)-LARP4_target	l2fc(WCE_KO:WT) < neg 0.5 (Down) and p-value <0.05	l2fc(WCE_KO:WT) < neg 0.5 (Down)-LARP4_target	l2fc(WCE_KO:WT) > pos 0.5 (Up) and p-value <0.05	l2fc(WCE_KO:WT) > pos 0.5 (Up)-LARP4_target
EPCAM	FALSE	EPCAM	FALSE	PUF60	TRUE	EPCAM	FALSE	GSTP1	TRUE
INTS1	FALSE	SPINT2	TRUE	DKC1	FALSE	SPINT2	TRUE	KCTD12	FALSE
SPINT2	TRUE	SARS2	FALSE	ATP11C	FALSE	SARS2	FALSE	IFI16	FALSE
SARS2	FALSE	LSR	TRUE	CYB5R3	FALSE	LSR	TRUE	DECR1	FALSE
LSR	TRUE	CAV1	FALSE	ADD2	FALSE	CAV1	FALSE	CPT1A	FALSE
CAV1	FALSE	ITGA1	FALSE	PACSIN3	FALSE	ITGA1	FALSE	NES	FALSE
ITGA1	FALSE	GRAMD1A	FALSE	DDAH1	FALSE	GRAMD1A	FALSE	CISD1	FALSE
GRAMD1A	FALSE	ACOT1	FALSE	FKBP11	FALSE	ACOT1	FALSE	ALDH2	FALSE
ACOT1	FALSE	ACOT2	FALSE	SLC12A2	FALSE	ACOT2	FALSE	CHCHD2	TRUE
ACOT2	FALSE	EPPK1	FALSE	SLTM	FALSE	EPPK1	FALSE	CHCHD2P9	FALSE
EPPK1	FALSE	TIMM50	FALSE	RBM19	FALSE	TIMM50	FALSE	ACOT7	TRUE
TIMM50	FALSE	HLA-A	FALSE	SEPTIN8	FALSE	HLA-A	FALSE	COL6A1	FALSE
HLA-A	FALSE	COQ8B	FALSE	MBD2	FALSE	COQ8B	FALSE	MBOAT7	TRUE
COQ8B	FALSE	PLD3	TRUE	DNAJC11	FALSE	PLD3	TRUE	MSN	FALSE
PLD3	TRUE	LARP4	FALSE	RABL3	FALSE	LARP4	FALSE	TXNRD1	FALSE
LARP4	FALSE	ITGA3	FALSE	YTHDC1	FALSE	ITGA3	FALSE	IDH2	FALSE
ITGA3	FALSE	ACTN4	FALSE	PHC2	FALSE	ACTN4	FALSE	TPP2	FALSE
FN1	FALSE	LCP1	FALSE	SEC61A2	FALSE	LCP1	FALSE	CARS2	FALSE
ACTN4	FALSE	GPRC5C	TRUE	NFIC	FALSE	GPRC5C	TRUE	NME4	FALSE
MARCKS	FALSE	HEXB	FALSE	ZNF512	FALSE	HEXB	FALSE	HMOX1	FALSE
LCP1	FALSE	ACTN3	FALSE	CTDSPL2	FALSE	ACTN3	FALSE	GAPDH	TRUE
GPRC5C	TRUE	ACTN2	FALSE	PPA1	FALSE	ACTN2	FALSE	PGD	FALSE
HEXB	FALSE	IRS4	FALSE	MECP2	FALSE	IRS4	FALSE	SLC9A3R1	FALSE
PSMD5	FALSE	P4HA2	FALSE	POP5	FALSE	P4HA2	FALSE	ANXA6	FALSE
MYH9	FALSE	GPATCH1	FALSE	RPRD2	FALSE	GPATCH1	FALSE	FDXR	FALSE
ACTN3	FALSE	PDLIM7	FALSE	SEC61A1	FALSE	PDLIM7	FALSE	PTPN1	FALSE
ACTN2	FALSE	ACTN1	FALSE	TFCP2	FALSE	ACTN1	FALSE	CCDC8	FALSE
IRS4	FALSE	TBCB	FALSE	PRDX4	TRUE	TBCB	FALSE	CHAMP1	FALSE
P4HA2	FALSE	MAVS	FALSE	TMCO1	FALSE	MAVS	FALSE	UBA1	FALSE
GPATCH1	FALSE	NDUFAF2	FALSE	RAB10	FALSE	NDUFAF2	FALSE	AKR7L	FALSE
PDLIM7	FALSE	ATL3	FALSE	MTX3	FALSE	ATL3	FALSE	UPF3B	FALSE
ACTN1	FALSE	MGME1	FALSE	HPRT1	FALSE	MGME1	FALSE	DNAJC3	FALSE
TBCB	FALSE	LIN28B	FALSE	SRPRA	FALSE	LIN28B	FALSE	PRDX2	TRUE
MAVS	FALSE	OCLN	FALSE	LMF2	FALSE	OCLN	FALSE	PRAF2	TRUE
NDUFAF2	FALSE	SLC2A1	FALSE	POLR1B	FALSE	SLC2A1	FALSE	CKMT2	FALSE
TPM4	FALSE	GCSH	FALSE	AP2M1	TRUE	GCSH	FALSE	ABCC4	FALSE
MAP7	FALSE	TJP2	FALSE	DLG1	FALSE	TJP2	FALSE	BRD2	FALSE
RCN1	FALSE	ECH1	FALSE	BRD4	FALSE	ECH1	FALSE	RAP2B	FALSE
MYH11	FALSE	HLA-H	FALSE	C2CD2L	FALSE	HLA-H	FALSE	CFL1	TRUE
ATL3	FALSE	FASTKD5	FALSE	SLC2A3	FALSE	FASTKD5	FALSE	NF2	FALSE
MGME1	FALSE	MRPS12	TRUE	ELAVL2	FALSE	MRPS12	TRUE	PYCR2	FALSE
LIN28B	FALSE	ERMP1	FALSE	ELAVL4	FALSE	ERMP1	FALSE	TPI1	TRUE
OCLN	FALSE	FAM241A	FALSE	ACAD9	FALSE	FAM241A	FALSE	ATAD3B	TRUE
SLC2A1	FALSE	CGN	FALSE	MLF2	FALSE	CGN	FALSE	ATAD3A	FALSE
TPM1	FALSE	C19orf47	FALSE	PFN1	TRUE	C19orf47	FALSE	SLC25A22	FALSE
CNPY2	FALSE	MRPS9	FALSE	NAA15	FALSE	MRPS9	FALSE	ATAD3C	FALSE
GCSH	FALSE	EARS2	FALSE	HSP90B1	FALSE	EARS2	FALSE	CKMT1A	FALSE
FDX1	FALSE	NEXN	FALSE	PDS5B	FALSE	NEXN	FALSE	CFL2	FALSE
TJP2	FALSE	DSP	FALSE	EIF5A	TRUE	DSP	FALSE	SLC25A10	FALSE
ECH1	FALSE	PBXIP1	FALSE	EIF5A2	FALSE	PBXIP1	FALSE	GDI1	FALSE
HLA-H	FALSE	CAVIN1	FALSE	SLC16A1	FALSE	CAVIN1	FALSE	PHF6	FALSE
MYL6B	FALSE	TMX2	FALSE	CRLF3	FALSE	TMX2	FALSE	RHOA	FALSE
FASTKD5	FALSE	RIDA	FALSE	NUP50	FALSE	RIDA	FALSE		FALSE
MRPS12	TRUE	REEP5	FALSE	SLC1A5	FALSE	REEP5	FALSE		FALSE
ERMP1	FALSE	MRPS25	FALSE	EZH2	FALSE	MRPS25	FALSE		FALSE
FAM241A	FALSE	P3H2	FALSE	EIF5AL1	FALSE	P3H2	FALSE		FALSE
AHNAK	FALSE	ALG5	FALSE	LMNB2	FALSE	ALG5	FALSE		FALSE
CGN	FALSE	HACL1	FALSE	LBR	FALSE	HACL1	FALSE		FALSE
C19orf47	FALSE	TUFM	TRUE	STOM	FALSE	TUFM	TRUE		FALSE
TPM2	FALSE	NDUFB9	TRUE	HSP90B2P	FALSE	NDUFB9	TRUE		FALSE
GPI	FALSE	NDUFA12	FALSE	RETSAT	FALSE	NDUFA12	FALSE		FALSE
MRPS9	FALSE	MRPS14	FALSE	CENPV	FALSE	MRPS14	FALSE		FALSE
EARS2	FALSE	RAB4B	FALSE	RAB7A	FALSE		FALSE		FALSE
NEXN	FALSE	P4HA1	FALSE	AP2A2	FALSE		FALSE		FALSE
PAK4	FALSE	MRPS34	TRUE	CASK	FALSE		FALSE		FALSE
MYH14	FALSE	MRPS27	FALSE	ARHGDIA	FALSE		FALSE		FALSE
AKAP12	FALSE	MRPL13	FALSE	MYOF	FALSE		FALSE		FALSE
DSP	FALSE	NUDT19	FALSE	TMEM109	FALSE		FALSE		FALSE
PBXIP1	FALSE	TP53	FALSE	MAP4	FALSE		FALSE		FALSE
PPL	FALSE	CHCHD1	TRUE	MDH1	FALSE		FALSE		FALSE
CAVIN1	FALSE	FAHD1	FALSE	FSCN1	FALSE		FALSE		FALSE
PDCD5	FALSE	DHRS7B	FALSE	CPSF6	FALSE		FALSE		FALSE
TMX2	FALSE	MRPS30	FALSE	HYOU1	FALSE		FALSE		FALSE
RIDA	FALSE	MRRF	FALSE	IMPDH2	FALSE		FALSE		FALSE
IRGQ	FALSE	NDUFA2	TRUE	EPHX1	TRUE		FALSE		FALSE
REEP5	FALSE	COQ7	FALSE	FARP1	FALSE		FALSE		FALSE
MRPS25	FALSE	MRPS2	FALSE	TOP1MT	FALSE		FALSE		FALSE
HMGA2	FALSE	DNAJC1	FALSE	HSD17B12	FALSE		FALSE		FALSE
MYL6	TRUE	KMT2B	FALSE	EZR	FALSE		FALSE		FALSE
P3H2	FALSE	STOML2	FALSE	LDHA	TRUE		FALSE		FALSE
SUPT5H	FALSE	RAB9A	FALSE	ARID3B	FALSE		FALSE		FALSE
ALG5	FALSE	PCK2	FALSE	HBA1	FALSE		FALSE		FALSE
HACL1	FALSE	MRPS21	FALSE	LMNB1	FALSE		FALSE		FALSE
TUFM	TRUE	CDS2	FALSE	ZNF512B	FALSE		FALSE		FALSE
NDUFB9	TRUE	MRPS23	TRUE	ADNP	FALSE		FALSE		FALSE
NDUFA12	FALSE	MRPS36	FALSE	NT5DC2	FALSE		FALSE		FALSE
MRPS14	FALSE	SGPL1	FALSE	RAN	TRUE		FALSE		FALSE
HLA-E	FALSE	CTAGE9	FALSE	RBBP4	FALSE		FALSE		FALSE
TPM3	FALSE	CTAGE4	FALSE	NKRF	FALSE		FALSE		FALSE
RAB4B	FALSE	CTAGE6	FALSE	GNAI2	TRUE		FALSE		FALSE
VAMP8	TRUE	CTAGE8	FALSE	ETFDH	FALSE		FALSE		FALSE
P4HA1	FALSE	CTAGE15	FALSE	PRDX1	TRUE		FALSE		FALSE
MRPS34	TRUE	A0A2R8YE69	FALSE	OPA1	FALSE		FALSE		FALSE
MRPS27	FALSE	MIA2	FALSE	EMD	TRUE		FALSE		FALSE
MRPL13	FALSE	ABHD12	FALSE	PLOD1	TRUE		FALSE		FALSE
NUDT19	FALSE	MRPL39	FALSE	RP2	FALSE		FALSE		FALSE
TP53	FALSE	ARPC5L	FALSE	ENO1	TRUE		FALSE		FALSE
CHCHD1	TRUE	SLC27A4	FALSE	P4HB	FALSE		FALSE		FALSE
FAHD1	FALSE	QRSL1	FALSE	ZMYND8	FALSE		FALSE		FALSE
DHRS7B	FALSE	CDK5RAP1	FALSE	HACD3	FALSE		FALSE		FALSE
MRPS30	FALSE	NDUFB7	FALSE	GNB2	TRUE		FALSE		FALSE
PRKCSH	FALSE	MRPL47	FALSE	ENO2	FALSE		FALSE		FALSE
MRRF	FALSE	LMAN2	FALSE	ADD3	FALSE		FALSE		FALSE
NDUFA2	TRUE	HINT2	FALSE	GUK1	FALSE		FALSE		FALSE
NDUFA8	TRUE	CEBPG	FALSE	CCDC134	FALSE		FALSE		FALSE
NCAM1	FALSE	EPHA7	FALSE	NSD2	FALSE		FALSE		FALSE
COQ7	FALSE	MRPS33	FALSE	EI24	FALSE		FALSE		FALSE
NSFL1C	FALSE	POLRMT	FALSE	ALCAM	FALSE		FALSE		FALSE
FLNA	FALSE	TMED10	FALSE	SLC3A2	FALSE		FALSE		FALSE
SCAMP1	FALSE	MRPL43	TRUE	ADD1	FALSE		FALSE		FALSE
MRPS2	FALSE	YES1	FALSE	LDHB	TRUE		FALSE		FALSE
DNAJC1	FALSE	DDRGK1	TRUE	TMPO	FALSE		FALSE		FALSE
KMT2B	FALSE	TMED7	FALSE	ERP29	TRUE		FALSE		FALSE
STOML2	FALSE	LSM14A	FALSE	NONO	FALSE		FALSE		FALSE
RAB9A	FALSE	MRPS11	TRUE	UBAC2	FALSE		FALSE		FALSE
PCK2	FALSE	MRPL38	TRUE	SLIT2	FALSE		FALSE		FALSE
NDUFV3	FALSE	FYN	FALSE	AP2S1	TRUE		FALSE		FALSE
MRPS21	FALSE	IDH3B	FALSE	STRN	FALSE		FALSE		FALSE
CDS2	FALSE	MRPL52	FALSE	ALDOA	TRUE		FALSE		FALSE
PLS3	FALSE	NDUFS1	FALSE	ANXA5	FALSE		FALSE		FALSE
MRPS23	TRUE	BCKDHA	FALSE	XXYLT1	TRUE		FALSE		FALSE
MRPS36	FALSE	MRPS7	FALSE	ANXA1	FALSE		FALSE		FALSE
NAGLU	FALSE	GLG1	FALSE	OLA1	FALSE		FALSE		FALSE
SGPL1	FALSE	ELMOD2	FALSE	SRRM1	FALSE		FALSE		FALSE
LMBRD1	FALSE	MRPL55	FALSE	RDX	FALSE		FALSE		FALSE
FKBP15	FALSE	CDKAL1	FALSE	POGLUT2	FALSE		FALSE		FALSE
DBN1	TRUE	PIGS	FALSE	AKR7A2	FALSE		FALSE		FALSE
CTAGE9	FALSE	MRM3	FALSE	GNB4	FALSE		FALSE		FALSE
CTAGE4	FALSE	PTGES2	FALSE	ZNF592	FALSE		FALSE		FALSE
CTAGE6	FALSE	ALDH6A1	FALSE	SLC25A5	TRUE		FALSE		FALSE
CTAGE8	FALSE	PIGT	TRUE	DSTN	FALSE		FALSE		FALSE
CTAGE15	FALSE	MTREX	FALSE	CNP	FALSE		FALSE		FALSE
A0A2R8YE69	FALSE	APMAP	TRUE	RHOC	TRUE		FALSE		FALSE
MIA2	FALSE	DLST	FALSE	PGK1	FALSE		FALSE		FALSE
ABHD12	FALSE	MRPL40	TRUE	TOP1	FALSE		FALSE		FALSE
MRPL39	FALSE	CCN1	FALSE	COL4A1	FALSE		FALSE		FALSE
ARPC5L	FALSE	KIF2A	FALSE	RHOB	FALSE		FALSE		FALSE
FYCO1	FALSE	NDUFS4	TRUE	SLC25A4	FALSE		FALSE		FALSE
TTF2	FALSE	MRPL54	TRUE	PALM	FALSE		FALSE		FALSE
UACA	FALSE	ACTR3B	FALSE	UBTF	FALSE		FALSE		FALSE
SLC27A4	FALSE	UQCRFS1P1	FALSE	ANK3	FALSE		FALSE		FALSE
QRSL1	FALSE	NDUFS6	TRUE	G6PD	FALSE		FALSE		FALSE
PRORP	FALSE	NDUFS7	TRUE	GNB1	FALSE		FALSE		FALSE
CDK5RAP1	FALSE	NDUFV1	TRUE	SLC25A6	FALSE		FALSE		FALSE
NDUFB7	FALSE	MRPL24	TRUE	GPC4	FALSE		FALSE		FALSE
PURB	FALSE	MRPL41	TRUE	ALDOC	FALSE		FALSE		FALSE
MRPL47	FALSE	MRPS35	FALSE	CHMP2B	FALSE		FALSE		FALSE
MTARC2	FALSE	GADD45GIP1	TRUE	VAPB	FALSE		FALSE		FALSE
RBM42	TRUE	MRPL27	FALSE	HMGA1	FALSE		FALSE		FALSE
LMAN2	FALSE	RMDN3	FALSE	RANBP1	FALSE		FALSE		FALSE
HINT2	FALSE	NDUFS5	TRUE	SLC7A5	FALSE		FALSE		FALSE
MYH10	FALSE	NDUFB6	FALSE	GSTP1	TRUE		FALSE		FALSE
CEBPG	FALSE	MRPS6	FALSE	KCTD12	FALSE		FALSE		FALSE
EPHA7	FALSE	MRPL4	TRUE	IFI16	FALSE		FALSE		FALSE
MRPS33	FALSE	NDUFB8	TRUE	DECR1	FALSE		FALSE		FALSE
SFT2D3	FALSE	MBLAC2	FALSE	CPT1A	FALSE		FALSE		FALSE
SPTBN4	FALSE	NDUFA6	TRUE	NES	FALSE		FALSE		FALSE
POLRMT	FALSE	TAMM41	FALSE	CISD1	FALSE		FALSE		FALSE
ARHGEF1	FALSE	CYP51A1	FALSE	ALDH2	FALSE		FALSE		FALSE
TMED10	FALSE	RIOX1	FALSE	CHCHD2	TRUE		FALSE		FALSE
MRPL43	TRUE	MRPL44	FALSE	CHCHD2P9	FALSE		FALSE		FALSE
TPBG	FALSE	NOA1	FALSE	ACOT7	TRUE		FALSE		FALSE
YES1	FALSE	NDUFS2	FALSE	COL6A1	FALSE		FALSE		FALSE
DDRGK1	TRUE	TOR1AIP2	FALSE	MBOAT7	TRUE		FALSE		FALSE
TMED7	FALSE	MRPL3	FALSE	MSN	FALSE		FALSE		FALSE
LSM14A	FALSE	ERBIN	FALSE	TXNRD1	FALSE		FALSE		FALSE
MRPS11	TRUE	MRPL22	TRUE	IDH2	FALSE		FALSE		FALSE
MRPL38	TRUE	MRPS18A	TRUE	TPP2	FALSE		FALSE		FALSE
FYN	FALSE	NDUFA7	TRUE	CARS2	FALSE		FALSE		FALSE
IDH3B	FALSE	SSBP1	FALSE	NME4	FALSE		FALSE		FALSE
MRPL52	FALSE	MRPL2	FALSE	HMOX1	FALSE		FALSE		FALSE
NDUFS1	FALSE	MUL1	FALSE	GAPDH	TRUE		FALSE		FALSE
CLTA	TRUE	CXADR	FALSE	PGD	FALSE		FALSE		FALSE
BCKDHA	FALSE	ECI2	FALSE	SLC9A3R1	FALSE		FALSE		FALSE
CD44	FALSE	COMT	TRUE	ANXA6	FALSE		FALSE		FALSE
MRPS7	FALSE	UQCRFS1	TRUE	FDXR	FALSE		FALSE		FALSE
GLG1	FALSE	MRPL11	FALSE	PTPN1	FALSE		FALSE		FALSE
GOLM1	FALSE	ZSWIM8	FALSE	CCDC8	FALSE		FALSE		FALSE
ELMOD2	FALSE	TOR1AIP1	FALSE	CHAMP1	FALSE		FALSE		FALSE
MRPL55	FALSE	MRPS28	FALSE	UBA1	FALSE		FALSE		FALSE
CTNNAL1	FALSE	COX6C	TRUE	AKR7L	FALSE		FALSE		FALSE
CDKAL1	FALSE	AK2	FALSE	UPF3B	FALSE		FALSE		FALSE
PIGS	FALSE	MRPL49	FALSE	DNAJC3	FALSE		FALSE		FALSE
MRM3	FALSE	GALNT2	FALSE	PRDX2	TRUE		FALSE		FALSE
PTGES2	FALSE	SCFD1	FALSE	PRAF2	TRUE		FALSE		FALSE
ALDH6A1	FALSE	TMEM43	FALSE	CKMT2	FALSE		FALSE		FALSE
PIGT	TRUE	NDUFA13	TRUE	ABCC4	FALSE		FALSE		FALSE
MTREX	FALSE	TOR1B	FALSE	BRD2	FALSE		FALSE		FALSE
APP	FALSE	CLPTM1L	FALSE	RAP2B	FALSE		FALSE		FALSE
APMAP	TRUE	DERL2	FALSE	CFL1	TRUE		FALSE		FALSE
DLST	FALSE	MRPS5	TRUE	NF2	FALSE		FALSE		FALSE
MRPL40	TRUE	PTRH2	FALSE	PYCR2	FALSE		FALSE		FALSE
GATC	FALSE	PIGK	FALSE	TPI1	TRUE		FALSE		FALSE
NPTN	FALSE	PLGRKT	FALSE	ATAD3B	TRUE		FALSE		FALSE
ITGB1	FALSE	MRPS15	FALSE	ATAD3A	FALSE		FALSE		FALSE
GDE1	FALSE	TRAP1	TRUE	SLC25A22	FALSE		FALSE		FALSE
CCN1	FALSE	NDUFB4	TRUE	ATAD3C	FALSE		FALSE		FALSE
KIF2A	FALSE	PCNA	FALSE	CKMT1A	FALSE		FALSE		FALSE
FIS1	FALSE	PDF	FALSE	CFL2	FALSE		FALSE		FALSE
NDUFS4	TRUE	FECH	FALSE	SLC25A10	FALSE		FALSE		FALSE
MRPL54	TRUE	THOC1	FALSE	GDI1	FALSE		FALSE		FALSE
SMCHD1	FALSE	CSNK2A1	FALSE	PHF6	FALSE		FALSE		FALSE
ACTR3B	FALSE	DSG2	FALSE	RHOA	FALSE		FALSE		FALSE
UQCRFS1P1	FALSE	PARN	FALSE		FALSE		FALSE		FALSE
NDUFS6	TRUE	ELAC2	FALSE		FALSE		FALSE		FALSE
NDUFS7	TRUE	GPAA1	FALSE		FALSE		FALSE		FALSE
CALD1	FALSE	RRBP1	FALSE		FALSE		FALSE		FALSE
NDUFV1	TRUE	KIF22	FALSE		FALSE		FALSE		FALSE
MRPL24	TRUE	FANCD2	FALSE		FALSE		FALSE		FALSE
MRPL41	TRUE	NDUFA9	TRUE		FALSE		FALSE		FALSE
IPO4	FALSE	MRPL45	FALSE		FALSE		FALSE		FALSE
MRPS35	FALSE	NDUFV2	TRUE		FALSE		FALSE		FALSE
GADD45GIP1	TRUE	CSNK2A3	FALSE		FALSE		FALSE		FALSE
MRPL27	FALSE	MIPEP	FALSE		FALSE		FALSE		FALSE
AKAP2	FALSE	CCDC86	FALSE		FALSE		FALSE		FALSE
RMDN3	FALSE	MAFK	FALSE		FALSE		FALSE		FALSE
NDUFS5	TRUE	ACTR3	FALSE		FALSE		FALSE		FALSE
NDUFB6	FALSE	COA3	TRUE		FALSE		FALSE		FALSE
MRPS6	FALSE	UBE2J1	FALSE		FALSE		FALSE		FALSE
MRPL4	TRUE	ERP44	FALSE		FALSE		FALSE		FALSE
NDUFB8	TRUE	ARPC4	FALSE		FALSE		FALSE		FALSE
MBLAC2	FALSE	NSA2	FALSE		FALSE		FALSE		FALSE
URI1	FALSE	DAP3	FALSE		FALSE		FALSE		FALSE
NDUFA6	TRUE	MRPS26	FALSE		FALSE		FALSE		FALSE
TAMM41	FALSE	NIPSNAP3A	FALSE		FALSE		FALSE		FALSE
CYP51A1	FALSE	PDHA1	FALSE		FALSE		FALSE		FALSE
RIOX1	FALSE	ABCB4	FALSE		FALSE		FALSE		FALSE
MRPL44	FALSE	MRPS22	FALSE		FALSE		FALSE		FALSE
NOA1	FALSE	MTHFD1L	FALSE		FALSE		FALSE		FALSE
NDUFS2	FALSE	VWA8	FALSE		FALSE		FALSE		FALSE
TOR1AIP2	FALSE	RARS2	FALSE		FALSE		FALSE		FALSE
DSC2	FALSE	PON2	FALSE		FALSE		FALSE		FALSE
MIA3	FALSE	MAFG	FALSE		FALSE		FALSE		FALSE
EIF3K	TRUE	EXD2	FALSE		FALSE		FALSE		FALSE
MRPL3	FALSE	MOGS	FALSE		FALSE		FALSE		FALSE
ERBIN	FALSE	PIGU	TRUE		FALSE		FALSE		FALSE
MRPL22	TRUE	LYRM2	FALSE		FALSE		FALSE		FALSE
MRPS18A	TRUE	MRPL48	FALSE		FALSE		FALSE		FALSE
NDUFA7	TRUE	NOP53	FALSE		FALSE		FALSE		FALSE
SSBP1	FALSE	RDH11	FALSE		FALSE		FALSE		FALSE
NFS1	FALSE	MRPS16	FALSE		FALSE		FALSE		FALSE
MARCKSL1	TRUE	OXA1L	FALSE		FALSE		FALSE		FALSE
MRPL2	FALSE	SDHB	FALSE		FALSE		FALSE		FALSE
MUL1	FALSE	MRPL50	FALSE		FALSE		FALSE		FALSE
CXADR	FALSE	TJP1	FALSE		FALSE		FALSE		FALSE
ECI2	FALSE	NDUFA10	TRUE		FALSE		FALSE		FALSE
COMT	TRUE	AURKAIP1	TRUE		FALSE		FALSE		FALSE
UQCRFS1	TRUE	NOL8	FALSE		FALSE		FALSE		FALSE
SUMO1P1	FALSE	MYO1B	FALSE		FALSE		FALSE		FALSE
MRPL11	FALSE	GFM2	FALSE		FALSE		FALSE		FALSE
NUF2	FALSE	TSFM	FALSE		FALSE		FALSE		FALSE
ZSWIM8	FALSE	MRPL17	FALSE		FALSE		FALSE		FALSE
TOR1AIP1	FALSE	NDUFS3	FALSE		FALSE		FALSE		FALSE
CBX1	FALSE	ISCA1	FALSE		FALSE		FALSE		FALSE
ADAM9	FALSE	GLDC	FALSE		FALSE		FALSE		FALSE
MRPS28	FALSE	GEMIN5	FALSE		FALSE		FALSE		FALSE
COX6C	TRUE	TIMM21	FALSE		FALSE		FALSE		FALSE
AK2	FALSE	COX7A2	TRUE		FALSE		FALSE		FALSE
PPP1R9A	FALSE	NDUFA5	FALSE		FALSE		FALSE		FALSE
MRPL49	FALSE	ACSL4	FALSE		FALSE		FALSE		FALSE
GET3	FALSE	MRPL28	TRUE		FALSE		FALSE		FALSE
SUMO1	FALSE	LRRC59	FALSE		FALSE		FALSE		FALSE
GALNT2	FALSE	RPF2	FALSE		FALSE		FALSE		FALSE
SCFD1	FALSE	MRPL15	FALSE		FALSE		FALSE		FALSE
SLC9A3R2	FALSE	SDHA	TRUE		FALSE		FALSE		FALSE
ENPP1	FALSE	AARS2	FALSE		FALSE		FALSE		FALSE
TMEM43	FALSE	SEL1L	FALSE		FALSE		FALSE		FALSE
TMED9	TRUE	ABCB1	FALSE		FALSE		FALSE		FALSE
NDUFA13	TRUE	TPX2	FALSE		FALSE		FALSE		FALSE
TOR1B	FALSE	MT-CO2	FALSE		FALSE		FALSE		FALSE
CLPTM1L	FALSE	TOR1A	FALSE		FALSE		FALSE		FALSE
MYL9	FALSE	MAN1A1	FALSE		FALSE		FALSE		FALSE
DERL2	FALSE	RRP12	FALSE		FALSE		FALSE		FALSE
MRPS5	TRUE	AUP1	FALSE		FALSE		FALSE		FALSE
PTRH2	FALSE	COX4I1	TRUE		FALSE		FALSE		FALSE
HSPA13	FALSE	MKI67	FALSE		FALSE		FALSE		FALSE
PIGK	FALSE	NOP16	FALSE		FALSE		FALSE		FALSE
PLGRKT	FALSE	TM9SF4	FALSE		FALSE		FALSE		FALSE
MRPL21	FALSE	EXOSC6	FALSE		FALSE		FALSE		FALSE
MRPS15	FALSE	MRPL42	FALSE		FALSE		FALSE		FALSE
TRAP1	TRUE	KIF14	FALSE		FALSE		FALSE		FALSE
HLA-C	TRUE	HARS2	FALSE		FALSE		FALSE		FALSE
FERMT2	FALSE	MTIF2	FALSE		FALSE		FALSE		FALSE
NDUFB4	TRUE	EMC3	FALSE		FALSE		FALSE		FALSE
FLNC	FALSE	FNDC3A	FALSE		FALSE		FALSE		FALSE
PCNA	FALSE	HCCS	FALSE		FALSE		FALSE		FALSE
PDF	FALSE		FALSE		FALSE		FALSE		FALSE
MRPL16	FALSE		FALSE		FALSE		FALSE		FALSE
FECH	FALSE		FALSE		FALSE		FALSE		FALSE
THOC1	FALSE		FALSE		FALSE		FALSE		FALSE
CSNK2A1	FALSE		FALSE		FALSE		FALSE		FALSE
PLS1	FALSE		FALSE		FALSE		FALSE		FALSE
DSG2	FALSE		FALSE		FALSE		FALSE		FALSE
FAS	FALSE		FALSE		FALSE		FALSE		FALSE
PARN	FALSE		FALSE		FALSE		FALSE		FALSE
ALG1	FALSE		FALSE		FALSE		FALSE		FALSE
NUBP2	TRUE		FALSE		FALSE		FALSE		FALSE
MYL12A	TRUE		FALSE		FALSE		FALSE		FALSE
MYL12B	TRUE		FALSE		FALSE		FALSE		FALSE
ELAC2	FALSE		FALSE		FALSE		FALSE		FALSE
GPAA1	FALSE		FALSE		FALSE		FALSE		FALSE
RRBP1	FALSE		FALSE		FALSE		FALSE		FALSE
NUP43	FALSE		FALSE		FALSE		FALSE		FALSE
KIF22	FALSE		FALSE		FALSE		FALSE		FALSE
TES	FALSE		FALSE		FALSE		FALSE		FALSE
FANCD2	FALSE		FALSE		FALSE		FALSE		FALSE
YIPF3	FALSE		FALSE		FALSE		FALSE		FALSE
NDUFA9	TRUE		FALSE		FALSE		FALSE		FALSE
MRPL45	FALSE		FALSE		FALSE		FALSE		FALSE
NDUFV2	TRUE		FALSE		FALSE		FALSE		FALSE
CSNK2A3	FALSE		FALSE		FALSE		FALSE		FALSE
MIPEP	FALSE		FALSE		FALSE		FALSE		FALSE
CCDC86	FALSE		FALSE		FALSE		FALSE		FALSE
CACNA2D1	FALSE		FALSE		FALSE		FALSE		FALSE
ATXN3	FALSE		FALSE		FALSE		FALSE		FALSE
MAFK	FALSE		FALSE		FALSE		FALSE		FALSE
ACTR3	FALSE		FALSE		FALSE		FALSE		FALSE
COA3	TRUE		FALSE		FALSE		FALSE		FALSE
UBE2J1	FALSE		FALSE		FALSE		FALSE		FALSE
STRBP	FALSE		FALSE		FALSE		FALSE		FALSE
ERP44	FALSE		FALSE		FALSE		FALSE		FALSE
MRPL9	FALSE		FALSE		FALSE		FALSE		FALSE
BCKDHB	FALSE		FALSE		FALSE		FALSE		FALSE
ARPC4	FALSE		FALSE		FALSE		FALSE		FALSE
MCCC2	FALSE		FALSE		FALSE		FALSE		FALSE
KANSL3	FALSE		FALSE		FALSE		FALSE		FALSE
NSA2	FALSE		FALSE		FALSE		FALSE		FALSE
MGA	FALSE		FALSE		FALSE		FALSE		FALSE
ITGAV	FALSE		FALSE		FALSE		FALSE		FALSE
DAP3	FALSE		FALSE		FALSE		FALSE		FALSE
BCS1L	TRUE		FALSE		FALSE		FALSE		FALSE
CCNB1	FALSE		FALSE		FALSE		FALSE		FALSE
TAGLN3	FALSE		FALSE		FALSE		FALSE		FALSE
MRPS26	FALSE		FALSE		FALSE		FALSE		FALSE
SNX27	FALSE		FALSE		FALSE		FALSE		FALSE
NIPSNAP3A	FALSE		FALSE		FALSE		FALSE		FALSE
OGDH	FALSE		FALSE		FALSE		FALSE		FALSE
ERO1A	FALSE		FALSE		FALSE		FALSE		FALSE
PDHA1	FALSE		FALSE		FALSE		FALSE		FALSE
SRC	FALSE		FALSE		FALSE		FALSE		FALSE
ABCB4	FALSE		FALSE		FALSE		FALSE		FALSE
SNTB1	FALSE		FALSE		FALSE		FALSE		FALSE
MRPS22	FALSE		FALSE		FALSE		FALSE		FALSE
CADM1	TRUE		FALSE		FALSE		FALSE		FALSE
MTHFD1L	FALSE		FALSE		FALSE		FALSE		FALSE
BOLA2	FALSE		FALSE		FALSE		FALSE		FALSE
SUMF2	FALSE		FALSE		FALSE		FALSE		FALSE
VWA8	FALSE		FALSE		FALSE		FALSE		FALSE
RARS2	FALSE		FALSE		FALSE		FALSE		FALSE
REXO2	FALSE		FALSE		FALSE		FALSE		FALSE
FAM3C	FALSE		FALSE		FALSE		FALSE		FALSE
SPECC1	FALSE		FALSE		FALSE		FALSE		FALSE
USP14	FALSE		FALSE		FALSE		FALSE		FALSE
WASHC2C	FALSE		FALSE		FALSE		FALSE		FALSE
TMED2	FALSE		FALSE		FALSE		FALSE		FALSE
PON2	FALSE		FALSE		FALSE		FALSE		FALSE
MAFG	FALSE		FALSE		FALSE		FALSE		FALSE
CDH2	FALSE		FALSE		FALSE		FALSE		FALSE
HIBCH	FALSE		FALSE		FALSE		FALSE		FALSE
CD2AP	FALSE		FALSE		FALSE		FALSE		FALSE
DENND4C	FALSE		FALSE		FALSE		FALSE		FALSE
CALU	FALSE		FALSE		FALSE		FALSE		FALSE
EXD2	FALSE		FALSE		FALSE		FALSE		FALSE
ERLEC1	FALSE		FALSE		FALSE		FALSE		FALSE
UCHL1	TRUE		FALSE		FALSE		FALSE		FALSE
MOGS	FALSE		FALSE		FALSE		FALSE		FALSE
XRCC1	FALSE		FALSE		FALSE		FALSE		FALSE
STXBP3	FALSE		FALSE		FALSE		FALSE		FALSE
ITGA6	FALSE		FALSE		FALSE		FALSE		FALSE
LIMA1	FALSE		FALSE		FALSE		FALSE		FALSE
PIGU	TRUE		FALSE		FALSE		FALSE		FALSE
LYRM2	FALSE		FALSE		FALSE		FALSE		FALSE
MRPL48	FALSE		FALSE		FALSE		FALSE		FALSE
UQCRB	FALSE		FALSE		FALSE		FALSE		FALSE
FLNB	FALSE		FALSE		FALSE		FALSE		FALSE
NOP53	FALSE		FALSE		FALSE		FALSE		FALSE
RDH11	FALSE		FALSE		FALSE		FALSE		FALSE
MRPS16	FALSE		FALSE		FALSE		FALSE		FALSE
OGDHL	FALSE		FALSE		FALSE		FALSE		FALSE
OXA1L	FALSE		FALSE		FALSE		FALSE		FALSE
SCAMP2	FALSE		FALSE		FALSE		FALSE		FALSE
TAGLN2	TRUE		FALSE		FALSE		FALSE		FALSE
SUMO3	FALSE		FALSE		FALSE		FALSE		FALSE
MYO1A	FALSE		FALSE		FALSE		FALSE		FALSE
SDHB	FALSE		FALSE		FALSE		FALSE		FALSE
SUMO2	FALSE		FALSE		FALSE		FALSE		FALSE
TBC1D10B	FALSE		FALSE		FALSE		FALSE		FALSE
STX4	FALSE		FALSE		FALSE		FALSE		FALSE
POTEJ	FALSE		FALSE		FALSE		FALSE		FALSE
POTEI	FALSE		FALSE		FALSE		FALSE		FALSE
WDR74	FALSE		FALSE		FALSE		FALSE		FALSE
SRP54	FALSE		FALSE		FALSE		FALSE		FALSE
MRPL19	FALSE		FALSE		FALSE		FALSE		FALSE
WASHC2A	FALSE		FALSE		FALSE		FALSE		FALSE
MRPL50	FALSE		FALSE		FALSE		FALSE		FALSE
TJP1	FALSE		FALSE		FALSE		FALSE		FALSE
NDUFA10	TRUE		FALSE		FALSE		FALSE		FALSE
AURKAIP1	TRUE		FALSE		FALSE		FALSE		FALSE
GNG12	FALSE		FALSE		FALSE		FALSE		FALSE
ACTR2	FALSE		FALSE		FALSE		FALSE		FALSE
NOL8	FALSE		FALSE		FALSE		FALSE		FALSE
MYO1B	FALSE		FALSE		FALSE		FALSE		FALSE
GFM2	FALSE		FALSE		FALSE		FALSE		FALSE
TSFM	FALSE		FALSE		FALSE		FALSE		FALSE
MRPL17	FALSE		FALSE		FALSE		FALSE		FALSE
NDUFS3	FALSE		FALSE		FALSE		FALSE		FALSE
TAP2	FALSE		FALSE		FALSE		FALSE		FALSE
SUMO4	FALSE		FALSE		FALSE		FALSE		FALSE
ISCA1	FALSE		FALSE		FALSE		FALSE		FALSE
TTK	FALSE		FALSE		FALSE		FALSE		FALSE
GLDC	FALSE		FALSE		FALSE		FALSE		FALSE
POFUT1	FALSE		FALSE		FALSE		FALSE		FALSE
CIT	FALSE		FALSE		FALSE		FALSE		FALSE
UBA2	FALSE		FALSE		FALSE		FALSE		FALSE
GEMIN5	FALSE		FALSE		FALSE		FALSE		FALSE
TIMM21	FALSE		FALSE		FALSE		FALSE		FALSE
TBCC	FALSE		FALSE		FALSE		FALSE		FALSE
ACLY	FALSE		FALSE		FALSE		FALSE		FALSE
COX7A2	TRUE		FALSE		FALSE		FALSE		FALSE
NDUFA5	FALSE		FALSE		FALSE		FALSE		FALSE
ACSL4	FALSE		FALSE		FALSE		FALSE		FALSE
MRPL28	TRUE		FALSE		FALSE		FALSE		FALSE
NPC1	FALSE		FALSE		FALSE		FALSE		FALSE
GOLGA2	FALSE		FALSE		FALSE		FALSE		FALSE
POTEF	FALSE		FALSE		FALSE		FALSE		FALSE
LRRC59	FALSE		FALSE		FALSE		FALSE		FALSE
RPF2	FALSE		FALSE		FALSE		FALSE		FALSE
MRPL15	FALSE		FALSE		FALSE		FALSE		FALSE
NUCB1	TRUE		FALSE		FALSE		FALSE		FALSE
ATP1B1	FALSE		FALSE		FALSE		FALSE		FALSE
SDHA	TRUE		FALSE		FALSE		FALSE		FALSE
SLC38A2	FALSE		FALSE		FALSE		FALSE		FALSE
AARS2	FALSE		FALSE		FALSE		FALSE		FALSE
SEL1L	FALSE		FALSE		FALSE		FALSE		FALSE
ABCB1	FALSE		FALSE		FALSE		FALSE		FALSE
TPX2	FALSE		FALSE		FALSE		FALSE		FALSE
MGAT1	FALSE		FALSE		FALSE		FALSE		FALSE
MT-CO2	FALSE		FALSE		FALSE		FALSE		FALSE
VTI1B	FALSE		FALSE		FALSE		FALSE		FALSE
PDHB	FALSE		FALSE		FALSE		FALSE		FALSE
NDC80	FALSE		FALSE		FALSE		FALSE		FALSE
TOR1A	FALSE		FALSE		FALSE		FALSE		FALSE
MAN1A1	FALSE		FALSE		FALSE		FALSE		FALSE
RRP12	FALSE		FALSE		FALSE		FALSE		FALSE
ZFYVE16	FALSE		FALSE		FALSE		FALSE		FALSE
AUP1	FALSE		FALSE		FALSE		FALSE		FALSE
COX4I1	TRUE		FALSE		FALSE		FALSE		FALSE
MKI67	FALSE		FALSE		FALSE		FALSE		FALSE
MZT2B	TRUE		FALSE		FALSE		FALSE		FALSE
LAGE3	TRUE		FALSE		FALSE		FALSE		FALSE
MIF	TRUE		FALSE		FALSE		FALSE		FALSE
TWF2	TRUE		FALSE		FALSE		FALSE		FALSE
POP7	TRUE		FALSE		FALSE		FALSE		FALSE
SELENOH	FALSE		FALSE		FALSE		FALSE		FALSE
PCBD1	TRUE		FALSE		FALSE		FALSE		FALSE
DAD1	TRUE		FALSE		FALSE		FALSE		FALSE
PEPD	TRUE		FALSE		FALSE		FALSE		FALSE
C12orf57	TRUE		FALSE		FALSE		FALSE		FALSE
CST3	TRUE		FALSE		FALSE		FALSE		FALSE
ATOX1	TRUE		FALSE		FALSE		FALSE		FALSE
POLR2G	TRUE		FALSE		FALSE		FALSE		FALSE
GPX4	TRUE		FALSE		FALSE		FALSE		FALSE
TXNDC17	TRUE		FALSE		FALSE		FALSE		FALSE
ADI1	TRUE		FALSE		FALSE		FALSE		FALSE
COPS6	TRUE		FALSE		FALSE		FALSE		FALSE
APRT	TRUE		FALSE		FALSE		FALSE		FALSE
HMBS	TRUE		FALSE		FALSE		FALSE		FALSE
PGLS	TRUE		FALSE		FALSE		FALSE		FALSE
PGLS	TRUE		FALSE		FALSE		FALSE		FALSE
MT1X	TRUE		FALSE		FALSE		FALSE		FALSE
DNPH1	TRUE		FALSE		FALSE		FALSE		FALSE
PPP5C	TRUE		FALSE		FALSE		FALSE		FALSE
APEH	TRUE		FALSE		FALSE		FALSE		FALSE
VPS28	TRUE		FALSE		FALSE		FALSE		FALSE
UBL7	TRUE		FALSE		FALSE		FALSE		FALSE
SERF2	TRUE		FALSE		FALSE		FALSE		FALSE
GLB1	TRUE		FALSE		FALSE		FALSE		FALSE
C1orf122	TRUE		FALSE		FALSE		FALSE		FALSE
MT2A	TRUE		FALSE		FALSE		FALSE		FALSE
PTRHD1	TRUE		FALSE		FALSE		FALSE		FALSE
SF3B5	TRUE		FALSE		FALSE		FALSE		FALSE
MPG	TRUE		FALSE		FALSE		FALSE		FALSE
CDK5	TRUE		FALSE		FALSE		FALSE		FALSE
RPP25L	TRUE		FALSE		FALSE		FALSE		FALSE
FKBP1A	TRUE		FALSE		FALSE		FALSE		FALSE
PTOV1	TRUE		FALSE		FALSE		FALSE		FALSE
PFDN5	TRUE		FALSE		FALSE		FALSE		FALSE
DCTPP1	TRUE		FALSE		FALSE		FALSE		FALSE
GINS2	TRUE		FALSE		FALSE		FALSE		FALSE
TMEM179B	TRUE		FALSE		FALSE		FALSE		FALSE
MZT2A	TRUE		FALSE		FALSE		FALSE		FALSE
GSTO1	TRUE		FALSE		FALSE		FALSE		FALSE
LRWD1	TRUE		FALSE		FALSE		FALSE		FALSE
CNBP	TRUE		FALSE		FALSE		FALSE		FALSE
SNX17	TRUE		FALSE		FALSE		FALSE		FALSE
TIMM10	TRUE		FALSE		FALSE		FALSE		FALSE
JPT1	FALSE		FALSE		FALSE		FALSE		FALSE
GSTM3	TRUE		FALSE		FALSE		FALSE		FALSE
CLTB	TRUE		FALSE		FALSE		FALSE		FALSE
ELOB	FALSE		FALSE		FALSE		FALSE		FALSE
SRI	TRUE		FALSE		FALSE		FALSE		FALSE
SSNA1	TRUE		FALSE		FALSE		FALSE		FALSE
PDRG1	FALSE		FALSE		FALSE		FALSE		FALSE
POLR2J	TRUE		FALSE		FALSE		FALSE		FALSE
BRAT1	TRUE		FALSE		FALSE		FALSE		FALSE
APEX1	TRUE		FALSE		FALSE		FALSE		FALSE
AKR1B1	TRUE		FALSE		FALSE		FALSE		FALSE
SUPT4H1	TRUE		FALSE		FALSE		FALSE		FALSE
GNB1L	FALSE		FALSE		FALSE		FALSE		FALSE
DYNLRB1	TRUE		FALSE		FALSE		FALSE		FALSE
PEBP1	TRUE		FALSE		FALSE		FALSE		FALSE
PSMB2	TRUE		FALSE		FALSE		FALSE		FALSE
BLVRA	TRUE		FALSE		FALSE		FALSE		FALSE
TIMM8B	TRUE		FALSE		FALSE		FALSE		FALSE
POLR2I	TRUE		FALSE		FALSE		FALSE		FALSE
FSD1	TRUE		FALSE		FALSE		FALSE		FALSE
MRFAP1	TRUE		FALSE		FALSE		FALSE		FALSE
ARL3	FALSE		FALSE		FALSE		FALSE		FALSE
SPAG7	TRUE		FALSE		FALSE		FALSE		FALSE
CMTR1	FALSE		FALSE		FALSE		FALSE		FALSE
THOP1	TRUE		FALSE		FALSE		FALSE		FALSE
THOP1	TRUE		FALSE		FALSE		FALSE		FALSE
HSPB1	TRUE		FALSE		FALSE		FALSE		FALSE
KDELR1	TRUE		FALSE		FALSE		FALSE		FALSE
TRIR	FALSE		FALSE		FALSE		FALSE		FALSE
SEPTIN5	FALSE		FALSE		FALSE		FALSE		FALSE
DRAP1	FALSE		FALSE		FALSE		FALSE		FALSE
FKBP3	FALSE		FALSE		FALSE		FALSE		FALSE
PPP1R14B	TRUE		FALSE		FALSE		FALSE		FALSE
HAUS4	FALSE		FALSE		FALSE		FALSE		FALSE
NSUN5	FALSE		FALSE		FALSE		FALSE		FALSE
GRK2	FALSE		FALSE		FALSE		FALSE		FALSE
ASAP2	FALSE		FALSE		FALSE		FALSE		FALSE
AIF1L	FALSE		FALSE		FALSE		FALSE		FALSE
GABARAP	TRUE		FALSE		FALSE		FALSE		FALSE
NUTF2	TRUE		FALSE		FALSE		FALSE		FALSE
ITPA	TRUE		FALSE		FALSE		FALSE		FALSE
SAP30BP	FALSE		FALSE		FALSE		FALSE		FALSE
RANBP3	FALSE		FALSE		FALSE		FALSE		FALSE
MCTS1	TRUE		FALSE		FALSE		FALSE		FALSE
AAMDC	FALSE		FALSE		FALSE		FALSE		FALSE
SPNS1	TRUE		FALSE		FALSE		FALSE		FALSE
TXNL4A	TRUE		FALSE		FALSE		FALSE		FALSE
LAMTOR2	TRUE		FALSE		FALSE		FALSE		FALSE
MAT2B	FALSE		FALSE		FALSE		FALSE		FALSE
NOP16	FALSE		FALSE		FALSE		FALSE		FALSE
TM9SF4	FALSE		FALSE		FALSE		FALSE		FALSE
SLC20A1	FALSE		FALSE		FALSE		FALSE		FALSE
EXOSC6	FALSE		FALSE		FALSE		FALSE		FALSE
FIBP	FALSE		FALSE		FALSE		FALSE		FALSE
TMOD1	FALSE		FALSE		FALSE		FALSE		FALSE
MRPL42	FALSE		FALSE		FALSE		FALSE		FALSE
MDC1	FALSE		FALSE		FALSE		FALSE		FALSE
CPVL	FALSE		FALSE		FALSE		FALSE		FALSE
KIF14	FALSE		FALSE		FALSE		FALSE		FALSE
POTEE	FALSE		FALSE		FALSE		FALSE		FALSE
RALA	FALSE		FALSE		FALSE		FALSE		FALSE
TXNDC5	FALSE		FALSE		FALSE		FALSE		FALSE
ALDH4A1	FALSE		FALSE		FALSE		FALSE		FALSE
ACOX1	FALSE		FALSE		FALSE		FALSE		FALSE
HARS2	FALSE		FALSE		FALSE		FALSE		FALSE
MPRIP	FALSE		FALSE		FALSE		FALSE		FALSE
MTIF2	FALSE		FALSE		FALSE		FALSE		FALSE
SPTBN1	FALSE		FALSE		FALSE		FALSE		FALSE
HAUS5	FALSE		FALSE		FALSE		FALSE		FALSE
AAMP	FALSE		FALSE		FALSE		FALSE		FALSE
PEF1	FALSE		FALSE		FALSE		FALSE		FALSE
EMC3	FALSE		FALSE		FALSE		FALSE		FALSE
BRK1	FALSE		FALSE		FALSE		FALSE		FALSE
FNDC3A	FALSE		FALSE		FALSE		FALSE		FALSE
KIF23	FALSE		FALSE		FALSE		FALSE		FALSE
MGMT	FALSE		FALSE		FALSE		FALSE		FALSE
KIF23	FALSE		FALSE		FALSE		FALSE		FALSE
CRNKL1	FALSE		FALSE		FALSE		FALSE		FALSE
HCCS	FALSE		FALSE		FALSE		FALSE		FALSE
SH3BGRL3	FALSE		FALSE		FALSE		FALSE		FALSE
TSC2	FALSE		FALSE		FALSE		FALSE		FALSE
YARS2	FALSE		FALSE		FALSE		FALSE		FALSE
HEXA	TRUE		FALSE		FALSE		FALSE		FALSE
LGALS1	FALSE		FALSE		FALSE		FALSE		FALSE
GYS1	FALSE		FALSE		FALSE		FALSE		FALSE
IARS2	FALSE		FALSE		FALSE		FALSE		FALSE
C1orf131	FALSE		FALSE		FALSE		FALSE		FALSE
TXNRD2	FALSE		FALSE		FALSE		FALSE		FALSE
CPD	FALSE		FALSE		FALSE		FALSE		FALSE
PDXDC2P	FALSE		FALSE		FALSE		FALSE		FALSE
SPTAN1	FALSE		FALSE		FALSE		FALSE		FALSE
MRPL58	FALSE		FALSE		FALSE		FALSE		FALSE
TMX3	FALSE		FALSE		FALSE		FALSE		FALSE
ACSF3	FALSE		FALSE		FALSE		FALSE		FALSE
GSK3A	FALSE		FALSE		FALSE		FALSE		FALSE
TNKS1BP1	FALSE		FALSE		FALSE		FALSE		FALSE
PSME1	FALSE		FALSE		FALSE		FALSE		FALSE
TMEM205	TRUE		FALSE		FALSE		FALSE		FALSE
ZMPSTE24	FALSE		FALSE		FALSE		FALSE		FALSE
NDUFA3	FALSE		FALSE		FALSE		FALSE		FALSE
GLRX5	FALSE		FALSE		FALSE		FALSE		FALSE
CLIC1	TRUE		FALSE		FALSE		FALSE		FALSE
MYCBP	FALSE		FALSE		FALSE		FALSE		FALSE
COX20	FALSE		FALSE		FALSE		FALSE		FALSE
LTN1	FALSE		FALSE		FALSE		FALSE		FALSE
MMUT	FALSE		FALSE		FALSE		FALSE		FALSE
CLU	FALSE		FALSE		FALSE		FALSE		FALSE
SIRT5	FALSE		FALSE		FALSE		FALSE		FALSE
GOT2	FALSE		FALSE		FALSE		FALSE		FALSE
SLC25A19	FALSE		FALSE		FALSE		FALSE		FALSE
H2BC13	FALSE		FALSE		FALSE		FALSE		FALSE
PITRM1	FALSE		FALSE		FALSE		FALSE		FALSE
PET100	TRUE		FALSE		FALSE		FALSE		FALSE
C1QBP	TRUE		FALSE		FALSE		FALSE		FALSE
BCKDK	FALSE		FALSE		FALSE		FALSE		FALSE
THOC7	FALSE		FALSE		FALSE		FALSE		FALSE
GPT2	FALSE		FALSE		FALSE		FALSE		FALSE
H2BC1	FALSE		FALSE		FALSE		FALSE		FALSE
CCNB2	FALSE		FALSE		FALSE		FALSE		FALSE
SETD3	FALSE		FALSE		FALSE		FALSE		FALSE
RNF25	FALSE		FALSE		FALSE		FALSE		FALSE
H2BU1	FALSE		FALSE		FALSE		FALSE		FALSE
PLP2	FALSE		FALSE		FALSE		FALSE		FALSE
PAWR	FALSE		FALSE		FALSE		FALSE		FALSE
EIF4H	FALSE		FALSE		FALSE		FALSE		FALSE
PTCD1	FALSE		FALSE		FALSE		FALSE		FALSE
MRPL12	TRUE		FALSE		FALSE		FALSE		FALSE
NRBP1	FALSE		FALSE		FALSE		FALSE		FALSE
PDCD6	FALSE		FALSE		FALSE		FALSE		FALSE
GOLIM4	FALSE		FALSE		FALSE		FALSE		FALSE
CENPB	FALSE		FALSE		FALSE		FALSE		FALSE
CLPP	TRUE		FALSE		FALSE		FALSE		FALSE
TIMM13	TRUE		FALSE		FALSE		FALSE		FALSE
TK1	FALSE		FALSE		FALSE		FALSE		FALSE
CEMIP2	FALSE		FALSE		FALSE		FALSE		FALSE
ZNF428	FALSE		FALSE		FALSE		FALSE		FALSE
ERCC4	FALSE		FALSE		FALSE		FALSE		FALSE
ARPC2	FALSE		FALSE		FALSE		FALSE		FALSE
HSDL2	FALSE		FALSE		FALSE		FALSE		FALSE
CDYL	FALSE		FALSE		FALSE		FALSE		FALSE
CKS2	FALSE		FALSE		FALSE		FALSE		FALSE
SERPINB6	FALSE		FALSE		FALSE		FALSE		FALSE
PELP1	FALSE		FALSE		FALSE		FALSE		FALSE
PPWD1	FALSE		FALSE		FALSE		FALSE		FALSE
PWWP2A	FALSE		FALSE		FALSE		FALSE		FALSE
NNT	FALSE		FALSE		FALSE		FALSE		FALSE
SEC16A	FALSE		FALSE		FALSE		FALSE		FALSE
SUPV3L1	FALSE		FALSE		FALSE		FALSE		FALSE
H2BS1	FALSE		FALSE		FALSE		FALSE		FALSE
SNTB2	FALSE		FALSE		FALSE		FALSE		FALSE
SNF8	FALSE		FALSE		FALSE		FALSE		FALSE
H2BC12	FALSE		FALSE		FALSE		FALSE		FALSE
SCO1	FALSE		FALSE		FALSE		FALSE		FALSE
TMEM214	FALSE		FALSE		FALSE		FALSE		FALSE
WDR46	FALSE		FALSE		FALSE		FALSE		FALSE
CCDC22	FALSE		FALSE		FALSE		FALSE		FALSE
PHIP	FALSE		FALSE		FALSE		FALSE		FALSE
MRPS18B	TRUE		FALSE		FALSE		FALSE		FALSE
H2BC14	FALSE		FALSE		FALSE		FALSE		FALSE
RNPEP	FALSE		FALSE		FALSE		FALSE		FALSE
H2BC10	FALSE		FALSE		FALSE		FALSE		FALSE
H2BC5	FALSE		FALSE		FALSE		FALSE		FALSE
H2BC9	FALSE		FALSE		FALSE		FALSE		FALSE
H2BC15	FALSE		FALSE		FALSE		FALSE		FALSE
H2BC18	FALSE		FALSE		FALSE		FALSE		FALSE
ACP2	FALSE		FALSE		FALSE		FALSE		FALSE
DDX4	FALSE		FALSE		FALSE		FALSE		FALSE
LOC102724159	FALSE		FALSE		FALSE		FALSE		FALSE
ARHGEF2	FALSE		FALSE		FALSE		FALSE		FALSE
WDR36	FALSE		FALSE		FALSE		FALSE		FALSE
CLPX	FALSE		FALSE		FALSE		FALSE		FALSE
PWP2	FALSE		FALSE		FALSE		FALSE		FALSE
H2BC11	FALSE		FALSE		FALSE		FALSE		FALSE
H2BC3	FALSE		FALSE		FALSE		FALSE		FALSE
H2BC17	FALSE		FALSE		FALSE		FALSE		FALSE
ASPSCR1	FALSE		FALSE		FALSE		FALSE		FALSE
H2BC21	FALSE		FALSE		FALSE		FALSE		FALSE
GGH	FALSE		FALSE		FALSE		FALSE		FALSE
MYO18A	FALSE		FALSE		FALSE		FALSE		FALSE
RPL7L1	FALSE		FALSE		FALSE		FALSE		FALSE
RNASEH2C	FALSE		FALSE		FALSE		FALSE		FALSE
HNRNPUL1	FALSE		FALSE		FALSE		FALSE		FALSE
HDGF	FALSE		FALSE		FALSE		FALSE		FALSE
SMN1	FALSE		FALSE		FALSE		FALSE		FALSE
PDAP1	FALSE		FALSE		FALSE		FALSE		FALSE
ACTC1	FALSE		FALSE		FALSE		FALSE		FALSE
ACTA1	FALSE		FALSE		FALSE		FALSE		FALSE
USF1	FALSE		FALSE		FALSE		FALSE		FALSE
GGCT	FALSE		FALSE		FALSE		FALSE		FALSE
UQCRC2	FALSE		FALSE		FALSE		FALSE		FALSE
SLC27A3	FALSE		FALSE		FALSE		FALSE		FALSE
KPNA6	FALSE		FALSE		FALSE		FALSE		FALSE
ACTG1	FALSE		FALSE		FALSE		FALSE		FALSE
SDF2	FALSE		FALSE		FALSE		FALSE		FALSE
ACTB	FALSE		FALSE		FALSE		FALSE		FALSE
MDH2	TRUE		FALSE		FALSE		FALSE		FALSE
MED25	FALSE		FALSE		FALSE		FALSE		FALSE
POLR3K	FALSE		FALSE		FALSE		FALSE		FALSE
DOHH	FALSE		FALSE		FALSE		FALSE		FALSE
ACTA2	FALSE		FALSE		FALSE		FALSE		FALSE
GABARAPL2	FALSE		FALSE		FALSE		FALSE		FALSE
ACTG2	FALSE		FALSE		FALSE		FALSE		FALSE
AIMP2	TRUE		FALSE		FALSE		FALSE		FALSE
ATP6V0A2	FALSE		FALSE		FALSE		FALSE		FALSE
OGFR	FALSE		FALSE		FALSE		FALSE		FALSE
DNAJB12	FALSE		FALSE		FALSE		FALSE		FALSE
H2AC6	FALSE		FALSE		FALSE		FALSE		FALSE
H2AW	FALSE		FALSE		FALSE		FALSE		FALSE
H2AC4	FALSE		FALSE		FALSE		FALSE		FALSE
MMAB	FALSE		FALSE		FALSE		FALSE		FALSE
GAPVD1	FALSE		FALSE		FALSE		FALSE		FALSE
UQCRQ	TRUE		FALSE		FALSE		FALSE		FALSE
PTCD3	FALSE		FALSE		FALSE		FALSE		FALSE
DDA1	FALSE		FALSE		FALSE		FALSE		FALSE
PPP1R7	FALSE		FALSE		FALSE		FALSE		FALSE
NUP88	FALSE		FALSE		FALSE		FALSE		FALSE
NOL6	FALSE		FALSE		FALSE		FALSE		FALSE
PRMT5	FALSE		FALSE		FALSE		FALSE		FALSE
PNPT1	FALSE		FALSE		FALSE		FALSE		FALSE
HMCES	FALSE		FALSE		FALSE		FALSE		FALSE
YME1L1	FALSE		FALSE		FALSE		FALSE		FALSE
GPD2	FALSE		FALSE		FALSE		FALSE		FALSE
SNAPIN	FALSE		FALSE		FALSE		FALSE		FALSE
WARS2	FALSE		FALSE		FALSE		FALSE		FALSE
TMA7	FALSE		FALSE		FALSE		FALSE		FALSE
ANAPC5	FALSE		FALSE		FALSE		FALSE		FALSE
MRC2	FALSE		FALSE		FALSE		FALSE		FALSE
MRPL53	FALSE		FALSE		FALSE		FALSE		FALSE
PDXDC1	FALSE		FALSE		FALSE		FALSE		FALSE
BUB1B	FALSE		FALSE		FALSE		FALSE		FALSE
ATP5PF	FALSE		FALSE		FALSE		FALSE		FALSE
ADSS2	FALSE		FALSE		FALSE		FALSE		FALSE
NEK9	FALSE		FALSE		FALSE		FALSE		FALSE
GNL2	FALSE		FALSE		FALSE		FALSE		FALSE
MMGT1	FALSE		FALSE		FALSE		FALSE		FALSE
FBL	FALSE		FALSE		FALSE		FALSE		FALSE
NOL12	FALSE		FALSE		FALSE		FALSE		FALSE
H2AC18	FALSE		FALSE		FALSE		FALSE		FALSE
DCAF7	FALSE		FALSE		FALSE		FALSE		FALSE
TIMM23	FALSE		FALSE		FALSE		FALSE		FALSE
DHODH	FALSE		FALSE		FALSE		FALSE		FALSE
FBN2	FALSE		FALSE		FALSE		FALSE		FALSE
CC2D1A	FALSE		FALSE		FALSE		FALSE		FALSE
USF2	FALSE		FALSE		FALSE		FALSE		FALSE
H2AC14	FALSE		FALSE		FALSE		FALSE		FALSE
H2AC12	FALSE		FALSE		FALSE		FALSE		FALSE
H2AC11	FALSE		FALSE		FALSE		FALSE		FALSE
MPP5	FALSE		FALSE		FALSE		FALSE		FALSE
C5orf24	FALSE		FALSE		FALSE		FALSE		FALSE
DDX51	FALSE		FALSE		FALSE		FALSE		FALSE
POLR2D	FALSE		FALSE		FALSE		FALSE		FALSE
RAB14	FALSE		FALSE		FALSE		FALSE		FALSE
EMC2	FALSE		FALSE		FALSE		FALSE		FALSE
DTNA	FALSE		FALSE		FALSE		FALSE		FALSE
PTPA	FALSE		FALSE		FALSE		FALSE		FALSE
HDDC2	FALSE		FALSE		FALSE		FALSE		FALSE
CTBP1	FALSE		FALSE		FALSE		FALSE		FALSE
CCDC115	FALSE		FALSE		FALSE		FALSE		FALSE
CYCS	FALSE		FALSE		FALSE		FALSE		FALSE
GAA	FALSE		FALSE		FALSE		FALSE		FALSE
UROD	FALSE		FALSE		FALSE		FALSE		FALSE
NCAPH2	FALSE		FALSE		FALSE		FALSE		FALSE
LASP1	FALSE		FALSE		FALSE		FALSE		FALSE
NIBAN2	FALSE		FALSE		FALSE		FALSE		FALSE
H2AC7	FALSE		FALSE		FALSE		FALSE		FALSE
FLYWCH2	FALSE		FALSE		FALSE		FALSE		FALSE
SNX2	FALSE		FALSE		FALSE		FALSE		FALSE
PMF1	FALSE		FALSE		FALSE		FALSE		FALSE
PGM1	FALSE		FALSE		FALSE		FALSE		FALSE
DGKE	FALSE		FALSE		FALSE		FALSE		FALSE
MPP6	FALSE		FALSE		FALSE		FALSE		FALSE
DNAJA1	FALSE		FALSE		FALSE		FALSE		FALSE
URB1	FALSE		FALSE		FALSE		FALSE		FALSE
MICU2	FALSE		FALSE		FALSE		FALSE		FALSE
UQCC2	TRUE		FALSE		FALSE		FALSE		FALSE
CD9	FALSE		FALSE		FALSE		FALSE		FALSE
ASNS	FALSE		FALSE		FALSE		FALSE		FALSE
FOXRED1	FALSE		FALSE		FALSE		FALSE		FALSE
CSRP1	FALSE		FALSE		FALSE		FALSE		FALSE
NUP214	FALSE		FALSE		FALSE		FALSE		FALSE
GMDS	FALSE		FALSE		FALSE		FALSE		FALSE
TMEM160	TRUE		FALSE		FALSE		FALSE		FALSE
HSPA7	FALSE		FALSE		FALSE		FALSE		FALSE
CTR9	FALSE		FALSE		FALSE		FALSE		FALSE
PMPCB	FALSE		FALSE		FALSE		FALSE		FALSE
DNTTIP1	FALSE		FALSE		FALSE		FALSE		FALSE
RNASET2	FALSE		FALSE		FALSE		FALSE		FALSE
SSU72	FALSE		FALSE		FALSE		FALSE		FALSE
HSPA1A	FALSE		FALSE		FALSE		FALSE		FALSE
HSPA1B	FALSE		FALSE		FALSE		FALSE		FALSE
ARPC1A	FALSE		FALSE		FALSE		FALSE		FALSE
MRPL46	TRUE		FALSE		FALSE		FALSE		FALSE
HM13	FALSE		FALSE		FALSE		FALSE		FALSE
GALE	FALSE		FALSE		FALSE		FALSE		FALSE
THOC6	FALSE		FALSE		FALSE		FALSE		FALSE
AK4	FALSE		FALSE		FALSE		FALSE		FALSE
CALM3	FALSE		FALSE		FALSE		FALSE		FALSE
MCRIP1	FALSE		FALSE		FALSE		FALSE		FALSE
CAPNS1	FALSE		FALSE		FALSE		FALSE		FALSE
TMX1	FALSE		FALSE		FALSE		FALSE		FALSE
MAPK3	FALSE		FALSE		FALSE		FALSE		FALSE
PKP2	FALSE		FALSE		FALSE		FALSE		FALSE
EPHA2	FALSE		FALSE		FALSE		FALSE		FALSE
PDHA2	FALSE		FALSE		FALSE		FALSE		FALSE
LRBA	FALSE		FALSE		FALSE		FALSE		FALSE
COQ8A	FALSE		FALSE		FALSE		FALSE		FALSE
DTD1	FALSE		FALSE		FALSE		FALSE		FALSE
PKP4	FALSE		FALSE		FALSE		FALSE		FALSE
POLDIP2	FALSE		FALSE		FALSE		FALSE		FALSE
ARPC5	FALSE		FALSE		FALSE		FALSE		FALSE
C19orf53	FALSE		FALSE		FALSE		FALSE		FALSE
SRM	FALSE		FALSE		FALSE		FALSE		FALSE
TBCD	FALSE		FALSE		FALSE		FALSE		FALSE
AHSA1	TRUE		FALSE		FALSE		FALSE		FALSE
UFSP2	FALSE		FALSE		FALSE		FALSE		FALSE
SNX9	FALSE		FALSE		FALSE		FALSE		FALSE
PPA2	FALSE		FALSE		FALSE		FALSE		FALSE
PIGO	FALSE		FALSE		FALSE		FALSE		FALSE
THOC5	FALSE		FALSE		FALSE		FALSE		FALSE
CERS2	FALSE		FALSE		FALSE		FALSE		FALSE
STRN4	FALSE		FALSE		FALSE		FALSE		FALSE
PNP	FALSE		FALSE		FALSE		FALSE		FALSE
ECD	FALSE		FALSE		FALSE		FALSE		FALSE
GATD3A	FALSE		FALSE		FALSE		FALSE		FALSE
GATD3B	FALSE		FALSE		FALSE		FALSE		FALSE
MYO1C	FALSE		FALSE		FALSE		FALSE		FALSE
BPHL	FALSE		FALSE		FALSE		FALSE		FALSE
ALDH1B1	FALSE		FALSE		FALSE		FALSE		FALSE
ATRAID	TRUE		FALSE		FALSE		FALSE		FALSE
H2BE1	FALSE		FALSE		FALSE		FALSE		FALSE
GLIPR2	FALSE		FALSE		FALSE		FALSE		FALSE
SVIL	FALSE		FALSE		FALSE		FALSE		FALSE
UBE2G2	FALSE		FALSE		FALSE		FALSE		FALSE
KIF20A	FALSE		FALSE		FALSE		FALSE		FALSE
DDX3X	FALSE		FALSE		FALSE		FALSE		FALSE
H2AC21	FALSE		FALSE		FALSE		FALSE		FALSE
COX7A2L	TRUE		FALSE		FALSE		FALSE		FALSE
ARL8A	FALSE		FALSE		FALSE		FALSE		FALSE
AFG3L2	FALSE		FALSE		FALSE		FALSE		FALSE
APOBEC3C	FALSE		FALSE		FALSE		FALSE		FALSE
NADK2	FALSE		FALSE		FALSE		FALSE		FALSE
PRC1	FALSE		FALSE		FALSE		FALSE		FALSE
H2AC1	FALSE		FALSE		FALSE		FALSE		FALSE
PPP1R10	FALSE		FALSE		FALSE		FALSE		FALSE
RRS1	FALSE		FALSE		FALSE		FALSE		FALSE
SEC63	FALSE		FALSE		FALSE		FALSE		FALSE
DDX3Y	FALSE		FALSE		FALSE		FALSE		FALSE
LAMC1	FALSE		FALSE		FALSE		FALSE		FALSE
UQCRC1	TRUE		FALSE		FALSE		FALSE		FALSE
TLN1	FALSE		FALSE		FALSE		FALSE		FALSE
SPAG5	FALSE		FALSE		FALSE		FALSE		FALSE
H2AZ1	FALSE		FALSE		FALSE		FALSE		FALSE
H2AZ2	FALSE		FALSE		FALSE		FALSE		FALSE
HARS1	FALSE		FALSE		FALSE		FALSE		FALSE
S100A13	FALSE		FALSE		FALSE		FALSE		FALSE
H2AC20	FALSE		FALSE		FALSE		FALSE		FALSE
CIAO1	FALSE		FALSE		FALSE		FALSE		FALSE
MYBBP1A	FALSE		FALSE		FALSE		FALSE		FALSE
HAUS6	FALSE		FALSE		FALSE		FALSE		FALSE
ENDOD1	FALSE		FALSE		FALSE		FALSE		FALSE
PPP4C	FALSE		FALSE		FALSE		FALSE		FALSE
H2AJ	FALSE		FALSE		FALSE		FALSE		FALSE
MTPAP	FALSE		FALSE		FALSE		FALSE		FALSE
NLN	FALSE		FALSE		FALSE		FALSE		FALSE
EXOSC4	FALSE		FALSE		FALSE		FALSE		FALSE
AP1S1	TRUE		FALSE		FALSE		FALSE		FALSE
ME2	FALSE		FALSE		FALSE		FALSE		FALSE
LMAN1	FALSE		FALSE		FALSE		FALSE		FALSE
POLE4	FALSE		FALSE		FALSE		FALSE		FALSE
DNAJB14	FALSE		FALSE		FALSE		FALSE		FALSE
H1-0	FALSE		FALSE		FALSE		FALSE		FALSE
KDSR	FALSE		FALSE		FALSE		FALSE		FALSE
DNAJA2	FALSE		FALSE		FALSE		FALSE		FALSE
TERF2	FALSE		FALSE		FALSE		FALSE		FALSE
GATB	FALSE		FALSE		FALSE		FALSE		FALSE
ITPR3	FALSE		FALSE		FALSE		FALSE		FALSE
ADGRL2	FALSE		FALSE		FALSE		FALSE		FALSE
GNS	FALSE		FALSE		FALSE		FALSE		FALSE
ZYX	FALSE		FALSE		FALSE		FALSE		FALSE
CHMP4B	FALSE		FALSE		FALSE		FALSE		FALSE
XRN2	FALSE		FALSE		FALSE		FALSE		FALSE
FADS2	TRUE		FALSE		FALSE		FALSE		FALSE
HSPA6	FALSE		FALSE		FALSE		FALSE		FALSE
GTPBP3	FALSE		FALSE		FALSE		FALSE		FALSE
SYNE1	FALSE		FALSE		FALSE		FALSE		FALSE
TOP2A	FALSE		FALSE		FALSE		FALSE		FALSE
IGF2BP1	FALSE		FALSE		FALSE		FALSE		FALSE
GK	FALSE		FALSE		FALSE		FALSE		FALSE
GK3P	FALSE		FALSE		FALSE		FALSE		FALSE
KTN1	FALSE		FALSE		FALSE		FALSE		FALSE
DYNC1LI2	FALSE		FALSE		FALSE		FALSE		FALSE
LSS	FALSE		FALSE		FALSE		FALSE		FALSE
UTP14C	FALSE		FALSE		FALSE		FALSE		FALSE
SMG9	FALSE		FALSE		FALSE		FALSE		FALSE
TMEM192	FALSE		FALSE		FALSE		FALSE		FALSE
LIMD2	FALSE		FALSE		FALSE		FALSE		FALSE
KIF11	FALSE		FALSE		FALSE		FALSE		FALSE
PSMA2	FALSE		FALSE		FALSE		FALSE		FALSE
RMDN1	FALSE		FALSE		FALSE		FALSE		FALSE
DHX37	FALSE		FALSE		FALSE		FALSE		FALSE
OCIAD2	TRUE		FALSE		FALSE		FALSE		FALSE
NDUFS8	TRUE		FALSE		FALSE		FALSE		FALSE
SFXN4	FALSE		FALSE		FALSE		FALSE		FALSE
AKT1S1	FALSE		FALSE		FALSE		FALSE		FALSE
NDUFAF3	FALSE		FALSE		FALSE		FALSE		FALSE
TBL3	FALSE		FALSE		FALSE		FALSE		FALSE
HSPE1	FALSE		FALSE		FALSE		FALSE		FALSE
CARHSP1	FALSE		FALSE		FALSE		FALSE		FALSE
SLC19A1	TRUE		FALSE		FALSE		FALSE		FALSE
MPHOSPH8	FALSE		FALSE		FALSE		FALSE		FALSE
RAD23A	FALSE		FALSE		FALSE		FALSE		FALSE
PLEC	FALSE		FALSE		FALSE		FALSE		FALSE
GDPD1	FALSE		FALSE		FALSE		FALSE		FALSE
STX3	FALSE		FALSE		FALSE		FALSE		FALSE
DST	FALSE		FALSE		FALSE		FALSE		FALSE
ATP2B3	FALSE		FALSE		FALSE		FALSE		FALSE
ATP2B2	FALSE		FALSE		FALSE		FALSE		FALSE
RAI14	FALSE		FALSE		FALSE		FALSE		FALSE
LCMT1	FALSE		FALSE		FALSE		FALSE		FALSE
CPNE1	FALSE		FALSE		FALSE		FALSE		FALSE
COX11	FALSE		FALSE		FALSE		FALSE		FALSE
SEC23B	FALSE		FALSE		FALSE		FALSE		FALSE
BPNT2	FALSE		FALSE		FALSE		FALSE		FALSE
PDXP	FALSE		FALSE		FALSE		FALSE		FALSE
BAZ1A	FALSE		FALSE		FALSE		FALSE		FALSE
M6PR	FALSE		FALSE		FALSE		FALSE		FALSE
NARS1	FALSE		FALSE		FALSE		FALSE		FALSE
FHL2	FALSE		FALSE		FALSE		FALSE		FALSE
RABGAP1	FALSE		FALSE		FALSE		FALSE		FALSE
TPD52	FALSE		FALSE		FALSE		FALSE		FALSE
MAP7D3	FALSE		FALSE		FALSE		FALSE		FALSE
NDUFAF4	FALSE		FALSE		FALSE		FALSE		FALSE
COX15	FALSE		FALSE		FALSE		FALSE		FALSE
CENPX	FALSE		FALSE		FALSE		FALSE		FALSE
MBD1	FALSE		FALSE		FALSE		FALSE		FALSE
DNASE2	FALSE		FALSE		FALSE		FALSE		FALSE
SBF1	FALSE		FALSE		FALSE		FALSE		FALSE
CFAP410	FALSE		FALSE		FALSE		FALSE		FALSE
TYSND1	FALSE		FALSE		FALSE		FALSE		FALSE
ATP2B4	FALSE		FALSE		FALSE		FALSE		FALSE
NXN	FALSE		FALSE		FALSE		FALSE		FALSE
ARL8B	FALSE		FALSE		FALSE		FALSE		FALSE
SSRP1	FALSE		FALSE		FALSE		FALSE		FALSE
OSBPL8	FALSE		FALSE		FALSE		FALSE		FALSE
MTCH1	FALSE		FALSE		FALSE		FALSE		FALSE
NACA	FALSE		FALSE		FALSE		FALSE		FALSE
VARS1	FALSE		FALSE		FALSE		FALSE		FALSE
UFL1	FALSE		FALSE		FALSE		FALSE		FALSE
CSNK2B	TRUE		FALSE		FALSE		FALSE		FALSE
NGDN	FALSE		FALSE		FALSE		FALSE		FALSE
GRHPR	FALSE		FALSE		FALSE		FALSE		FALSE
HSPA5	FALSE		FALSE		FALSE		FALSE		FALSE
PMPCA	TRUE		FALSE		FALSE		FALSE		FALSE
BLM	FALSE		FALSE		FALSE		FALSE		FALSE
WARS1	FALSE		FALSE		FALSE		FALSE		FALSE
FCF1	FALSE		FALSE		FALSE		FALSE		FALSE
USE1	FALSE		FALSE		FALSE		FALSE		FALSE
TIMM23B	FALSE		FALSE		FALSE		FALSE		FALSE
SYNGR2	FALSE		FALSE		FALSE		FALSE		FALSE
MED10	FALSE		FALSE		FALSE		FALSE		FALSE
LAMB1	FALSE		FALSE		FALSE		FALSE		FALSE
GET4	FALSE		FALSE		FALSE		FALSE		FALSE
BICD2	FALSE		FALSE		FALSE		FALSE		FALSE
CDC123	FALSE		FALSE		FALSE		FALSE		FALSE
PCDH7	FALSE		FALSE		FALSE		FALSE		FALSE
TRIOBP	FALSE		FALSE		FALSE		FALSE		FALSE
ARID1B	FALSE		FALSE		FALSE		FALSE		FALSE
ACADSB	FALSE		FALSE		FALSE		FALSE		FALSE
TMEM165	FALSE		FALSE		FALSE		FALSE		FALSE
RPS27AP5	FALSE		FALSE		FALSE		FALSE		FALSE
IDH3A	FALSE		FALSE		FALSE		FALSE		FALSE
DARS2	FALSE		FALSE		FALSE		FALSE		FALSE
RAB5A	FALSE		FALSE		FALSE		FALSE		FALSE
H4-16	FALSE		FALSE		FALSE		FALSE		FALSE
CYB5R1	FALSE		FALSE		FALSE		FALSE		FALSE
BCAR1	FALSE		FALSE		FALSE		FALSE		FALSE
CS	TRUE		FALSE		FALSE		FALSE		FALSE
RACGAP1	FALSE		FALSE		FALSE		FALSE		FALSE
DHRS7	FALSE		FALSE		FALSE		FALSE		FALSE
RALB	FALSE		FALSE		FALSE		FALSE		FALSE
SRSF12	FALSE		FALSE		FALSE		FALSE		FALSE
IGF1R	FALSE		FALSE		FALSE		FALSE		FALSE
COX5B	TRUE		FALSE		FALSE		FALSE		FALSE
SEPTIN9	FALSE		FALSE		FALSE		FALSE		FALSE
AKAP1	FALSE		FALSE		FALSE		FALSE		FALSE
COL4A2	FALSE		FALSE		FALSE		FALSE		FALSE
MACROH2A1	FALSE		FALSE		FALSE		FALSE		FALSE
LSM3	FALSE		FALSE		FALSE		FALSE		FALSE
CTNNB1	FALSE		FALSE		FALSE		FALSE		FALSE
HPS6	FALSE		FALSE		FALSE		FALSE		FALSE
XPO5	FALSE		FALSE		FALSE		FALSE		FALSE
HSPA1L	FALSE		FALSE		FALSE		FALSE		FALSE
RAB5B	FALSE		FALSE		FALSE		FALSE		FALSE
ITGA5	FALSE		FALSE		FALSE		FALSE		FALSE
RPIA	FALSE		FALSE		FALSE		FALSE		FALSE
IK	FALSE		FALSE		FALSE		FALSE		FALSE
FAF2	FALSE		FALSE		FALSE		FALSE		FALSE
GUSB	FALSE		FALSE		FALSE		FALSE		FALSE
UBC	TRUE		FALSE		FALSE		FALSE		FALSE
UBB	TRUE		FALSE		FALSE		FALSE		FALSE
ADPGK	FALSE		FALSE		FALSE		FALSE		FALSE
HSPA9	FALSE		FALSE		FALSE		FALSE		FALSE
UNC119	FALSE		FALSE		FALSE		FALSE		FALSE
TBL2	TRUE		FALSE		FALSE		FALSE		FALSE
STX8	FALSE		FALSE		FALSE		FALSE		FALSE
WDR18	TRUE		FALSE		FALSE		FALSE		FALSE
CXXC1	FALSE		FALSE		FALSE		FALSE		FALSE
UBA52	TRUE		FALSE		FALSE		FALSE		FALSE
ACTBL2	FALSE		FALSE		FALSE		FALSE		FALSE
TOX	FALSE		FALSE		FALSE		FALSE		FALSE
TOX3	FALSE		FALSE		FALSE		FALSE		FALSE
LIG3	FALSE		FALSE		FALSE		FALSE		FALSE
EMC8	FALSE		FALSE		FALSE		FALSE		FALSE
RRP1	FALSE		FALSE		FALSE		FALSE		FALSE
ASF1B	FALSE		FALSE		FALSE		FALSE		FALSE
NUCB2	FALSE		FALSE		FALSE		FALSE		FALSE
TOX4	FALSE		FALSE		FALSE		FALSE		FALSE
H3-2	FALSE		FALSE		FALSE		FALSE		FALSE
ALDH18A1	FALSE		FALSE		FALSE		FALSE		FALSE
METAP2	FALSE		FALSE		FALSE		FALSE		FALSE
HADHA	TRUE		FALSE		FALSE		FALSE		FALSE
KARS1	FALSE		FALSE		FALSE		FALSE		FALSE
TWNK	FALSE		FALSE		FALSE		FALSE		FALSE
GOLT1B	FALSE		FALSE		FALSE		FALSE		FALSE
RPS27A	TRUE		FALSE		FALSE		FALSE		FALSE
WDR3	FALSE		FALSE		FALSE		FALSE		FALSE
TMED4	FALSE		FALSE		FALSE		FALSE		FALSE
TPP1	FALSE		FALSE		FALSE		FALSE		FALSE
TOM1L2	FALSE		FALSE		FALSE		FALSE		FALSE
QSOX2	FALSE		FALSE		FALSE		FALSE		FALSE
SAE1	FALSE		FALSE		FALSE		FALSE		FALSE
POTEKP	FALSE		FALSE		FALSE		FALSE		FALSE
POR	TRUE		FALSE		FALSE		FALSE		FALSE
ZNF462	FALSE		FALSE		FALSE		FALSE		FALSE
MED24	FALSE		FALSE		FALSE		FALSE		FALSE
SEC23IP	FALSE		FALSE		FALSE		FALSE		FALSE
ACSL3	FALSE		FALSE		FALSE		FALSE		FALSE
FTSJ3	FALSE		FALSE		FALSE		FALSE		FALSE
NIPSNAP2	FALSE		FALSE		FALSE		FALSE		FALSE
NTMT1	FALSE		FALSE		FALSE		FALSE		FALSE
ACACA	FALSE		FALSE		FALSE		FALSE		FALSE
INTS3	FALSE		FALSE		FALSE		FALSE		FALSE
NEU1	FALSE		FALSE		FALSE		FALSE		FALSE
UTP3	FALSE		FALSE		FALSE		FALSE		FALSE
MAPRE3	FALSE		FALSE		FALSE		FALSE		FALSE
ALG9	FALSE		FALSE		FALSE		FALSE		FALSE
POLD2	FALSE		FALSE		FALSE		FALSE		FALSE
IMP4	FALSE		FALSE		FALSE		FALSE		FALSE
ZNF830	FALSE		FALSE		FALSE		FALSE		FALSE
MFN1	FALSE		FALSE		FALSE		FALSE		FALSE
EIF3G	FALSE		FALSE		FALSE		FALSE		FALSE
RNF123	FALSE		FALSE		FALSE		FALSE		FALSE
SEC11A	FALSE		FALSE		FALSE		FALSE		FALSE
VAPA	FALSE		FALSE		FALSE		FALSE		FALSE
HMGN2	FALSE		FALSE		FALSE		FALSE		FALSE
HMGN4	FALSE		FALSE		FALSE		FALSE		FALSE
ACAA1	FALSE		FALSE		FALSE		FALSE		FALSE
AGPS	FALSE		FALSE		FALSE		FALSE		FALSE
STING1	FALSE		FALSE		FALSE		FALSE		FALSE
PLOD3	FALSE		FALSE		FALSE		FALSE		FALSE
GLUD2	FALSE		FALSE		FALSE		FALSE		FALSE
F11R	FALSE		FALSE		FALSE		FALSE		FALSE
TRIP13	FALSE		FALSE		FALSE		FALSE		FALSE
UBXN1	FALSE		FALSE		FALSE		FALSE		FALSE
DIEXF	FALSE		FALSE		FALSE		FALSE		FALSE
TSSC4	FALSE		FALSE		FALSE		FALSE		FALSE
ESYT1	FALSE		FALSE		FALSE		FALSE		FALSE
RPL27A	TRUE		FALSE		FALSE		FALSE		FALSE
AIDA	FALSE		FALSE		FALSE		FALSE		FALSE
EDC4	FALSE		FALSE		FALSE		FALSE		FALSE
TACO1	FALSE		FALSE		FALSE		FALSE		FALSE
SCCPDH	FALSE		FALSE		FALSE		FALSE		FALSE
MRPL37	TRUE		FALSE		FALSE		FALSE		FALSE
H3C1	FALSE		FALSE		FALSE		FALSE		FALSE
TAF10	FALSE		FALSE		FALSE		FALSE		FALSE
ATP5PD	FALSE		FALSE		FALSE		FALSE		FALSE
CTNND1	FALSE		FALSE		FALSE		FALSE		FALSE
NDUFA4	TRUE		FALSE		FALSE		FALSE		FALSE
KPNA5	FALSE		FALSE		FALSE		FALSE		FALSE
PSMF1	FALSE		FALSE		FALSE		FALSE		FALSE
H3-4	FALSE		FALSE		FALSE		FALSE		FALSE
EHMT1	FALSE		FALSE		FALSE		FALSE		FALSE
MCAT	FALSE		FALSE		FALSE		FALSE		FALSE
NUP188	FALSE		FALSE		FALSE		FALSE		FALSE
LEMD2	FALSE		FALSE		FALSE		FALSE		FALSE
ZNF598	FALSE		FALSE		FALSE		FALSE		FALSE
NT5C3B	FALSE		FALSE		FALSE		FALSE		FALSE
DDX24	FALSE		FALSE		FALSE		FALSE		FALSE
RNF187	FALSE		FALSE		FALSE		FALSE		FALSE
FDFT1	TRUE		FALSE		FALSE		FALSE		FALSE
DCPS	FALSE		FALSE		FALSE		FALSE		FALSE
CDK1	FALSE		FALSE		FALSE		FALSE		FALSE
TACC1	FALSE		FALSE		FALSE		FALSE		FALSE
ORC3	FALSE		FALSE		FALSE		FALSE		FALSE
CZIB	FALSE		FALSE		FALSE		FALSE		FALSE
TRMT1L	FALSE		FALSE		FALSE		FALSE		FALSE
NLE1	FALSE		FALSE		FALSE		FALSE		FALSE
LGALS8	FALSE		FALSE		FALSE		FALSE		FALSE
ANAPC16	FALSE		FALSE		FALSE		FALSE		FALSE
DDX55	FALSE		FALSE		FALSE		FALSE		FALSE
CSTF3	FALSE		FALSE		FALSE		FALSE		FALSE
PI4KA	FALSE		FALSE		FALSE		FALSE		FALSE
EPB41L3	FALSE		FALSE		FALSE		FALSE		FALSE
PIH1D1	FALSE		FALSE		FALSE		FALSE		FALSE
GNAQ	FALSE		FALSE		FALSE		FALSE		FALSE
NOLC1	FALSE		FALSE		FALSE		FALSE		FALSE
AIFM1	FALSE		FALSE		FALSE		FALSE		FALSE
SDSL	FALSE		FALSE		FALSE		FALSE		FALSE
GLUD1	FALSE		FALSE		FALSE		FALSE		FALSE
STT3B	FALSE		FALSE		FALSE		FALSE		FALSE
SUCLA2	FALSE		FALSE		FALSE		FALSE		FALSE
EMC1	FALSE		FALSE		FALSE		FALSE		FALSE
NFYC	FALSE		FALSE		FALSE		FALSE		FALSE
EIF1	FALSE		FALSE		FALSE		FALSE		FALSE
AKR1A1	FALSE		FALSE		FALSE		FALSE		FALSE
VTN	FALSE		FALSE		FALSE		FALSE		FALSE
PSMD9	FALSE		FALSE		FALSE		FALSE		FALSE
ECPAS	FALSE		FALSE		FALSE		FALSE		FALSE
TLN2	FALSE		FALSE		FALSE		FALSE		FALSE
ECI1	FALSE		FALSE		FALSE		FALSE		FALSE
H2BC19P	FALSE		FALSE		FALSE		FALSE		FALSE
NPM3	FALSE		FALSE		FALSE		FALSE		FALSE
H2BC20P	FALSE		FALSE		FALSE		FALSE		FALSE
YJU2	FALSE		FALSE		FALSE		FALSE		FALSE
COG4	FALSE		FALSE		FALSE		FALSE		FALSE
PPIL1	FALSE		FALSE		FALSE		FALSE		FALSE
HMGN1	FALSE		FALSE		FALSE		FALSE		FALSE
TOMM20	FALSE		FALSE		FALSE		FALSE		FALSE
ACOT13	FALSE		FALSE		FALSE		FALSE		FALSE
NMT1	FALSE		FALSE		FALSE		FALSE		FALSE
VARS2	FALSE		FALSE		FALSE		FALSE		FALSE
VARS2	FALSE		FALSE		FALSE		FALSE		FALSE
VARS2	FALSE		FALSE		FALSE		FALSE		FALSE
PPT2	FALSE		FALSE		FALSE		FALSE		FALSE
VARS2	FALSE		FALSE		FALSE		FALSE		FALSE
VARS2	FALSE		FALSE		FALSE		FALSE		FALSE
MIF4GD	FALSE		FALSE		FALSE		FALSE		FALSE
SMU1	FALSE		FALSE		FALSE		FALSE		FALSE
H3C13	FALSE		FALSE		FALSE		FALSE		FALSE
NOMO3	FALSE		FALSE		FALSE		FALSE		FALSE
HADHB	FALSE		FALSE		FALSE		FALSE		FALSE
ATP2B1	FALSE		FALSE		FALSE		FALSE		FALSE
SZRD1	FALSE		FALSE		FALSE		FALSE		FALSE
OVCA2	FALSE		FALSE		FALSE		FALSE		FALSE
ATP5ME	FALSE		FALSE		FALSE		FALSE		FALSE
IARS1	FALSE		FALSE		FALSE		FALSE		FALSE
H2AX	FALSE		FALSE		FALSE		FALSE		FALSE
CUX1	FALSE		FALSE		FALSE		FALSE		FALSE
BRIX1	FALSE		FALSE		FALSE		FALSE		FALSE
SIGMAR1	TRUE		FALSE		FALSE		FALSE		FALSE
EBNA1BP2	FALSE		FALSE		FALSE		FALSE		FALSE
RPS19BP1	FALSE		FALSE		FALSE		FALSE		FALSE
RTF2	FALSE		FALSE		FALSE		FALSE		FALSE
ITSN1	FALSE		FALSE		FALSE		FALSE		FALSE
LGMN	FALSE		FALSE		FALSE		FALSE		FALSE
TRIP4	FALSE		FALSE		FALSE		FALSE		FALSE
SMAD2	FALSE		FALSE		FALSE		FALSE		FALSE
CTNNA1	FALSE		FALSE		FALSE		FALSE		FALSE
EXOC6	FALSE		FALSE		FALSE		FALSE		FALSE
NOMO1	FALSE		FALSE		FALSE		FALSE		FALSE
NUCKS1	FALSE		FALSE		FALSE		FALSE		FALSE
NOMO2	FALSE		FALSE		FALSE		FALSE		FALSE
NOP2	FALSE		FALSE		FALSE		FALSE		FALSE
PVR	FALSE		FALSE		FALSE		FALSE		FALSE
ZC3H18	FALSE		FALSE		FALSE		FALSE		FALSE
PNPO	FALSE		FALSE		FALSE		FALSE		FALSE
MAP2K3	FALSE		FALSE		FALSE		FALSE		FALSE
NSUN4	FALSE		FALSE		FALSE		FALSE		FALSE
ACAA2	FALSE		FALSE		FALSE		FALSE		FALSE
USP11	FALSE		FALSE		FALSE		FALSE		FALSE
EIF4E2	FALSE		FALSE		FALSE		FALSE		FALSE
GOLM2	FALSE		FALSE		FALSE		FALSE		FALSE
COPS7A	FALSE		FALSE		FALSE		FALSE		FALSE
DAZAP1	FALSE		FALSE		FALSE		FALSE		FALSE
RCN2	FALSE		FALSE		FALSE		FALSE		FALSE
GMNN	FALSE		FALSE		FALSE		FALSE		FALSE
SELENOO	FALSE		FALSE		FALSE		FALSE		FALSE
TGOLN2	FALSE		FALSE		FALSE		FALSE		FALSE
JAGN1	FALSE		FALSE		FALSE		FALSE		FALSE
ANLN	FALSE		FALSE		FALSE		FALSE		FALSE
EXOSC8	FALSE		FALSE		FALSE		FALSE		FALSE
KIAA1671	FALSE		FALSE		FALSE		FALSE		FALSE
ATP5MPL	FALSE		FALSE		FALSE		FALSE		FALSE
ATP5PO	FALSE		FALSE		FALSE		FALSE		FALSE
LYRM7	FALSE		FALSE		FALSE		FALSE		FALSE
BLVRB	FALSE		FALSE		FALSE		FALSE		FALSE
DRG2	FALSE		FALSE		FALSE		FALSE		FALSE
PHLDB2	FALSE		FALSE		FALSE		FALSE		FALSE
MPHOSPH6	FALSE		FALSE		FALSE		FALSE		FALSE
AK3	FALSE		FALSE		FALSE		FALSE		FALSE
APC	FALSE		FALSE		FALSE		FALSE		FALSE
DNAJA3	FALSE		FALSE		FALSE		FALSE		FALSE
SPIN1	FALSE		FALSE		FALSE		FALSE		FALSE
ARPC3	FALSE		FALSE		FALSE		FALSE		FALSE
MRPS31	FALSE		FALSE		FALSE		FALSE		FALSE
H3-3A	FALSE		FALSE		FALSE		FALSE		FALSE
SRFBP1	FALSE		FALSE		FALSE		FALSE		FALSE
PLK1	FALSE		FALSE		FALSE		FALSE		FALSE
PITPNB	FALSE		FALSE		FALSE		FALSE		FALSE
APOL2	FALSE		FALSE		FALSE		FALSE		FALSE
EXOC4	FALSE		FALSE		FALSE		FALSE		FALSE
HAT1	FALSE		FALSE		FALSE		FALSE		FALSE
BUB1	FALSE		FALSE		FALSE		FALSE		FALSE
HMGN3	FALSE		FALSE		FALSE		FALSE		FALSE
UBXN4	FALSE		FALSE		FALSE		FALSE		FALSE
SPTLC1	FALSE		FALSE		FALSE		FALSE		FALSE
AKT3	FALSE		FALSE		FALSE		FALSE		FALSE
EXOC8	FALSE		FALSE		FALSE		FALSE		FALSE
MRPL1	FALSE		FALSE		FALSE		FALSE		FALSE
PRKRIP1	FALSE		FALSE		FALSE		FALSE		FALSE
XPC	FALSE		FALSE		FALSE		FALSE		FALSE
TST	TRUE		FALSE		FALSE		FALSE		FALSE
ABR	FALSE		FALSE		FALSE		FALSE		FALSE
RAB18	FALSE		FALSE		FALSE		FALSE		FALSE
TAOK1	FALSE		FALSE		FALSE		FALSE		FALSE
FLOT1	FALSE		FALSE		FALSE		FALSE		FALSE
TTLL12	FALSE		FALSE		FALSE		FALSE		FALSE
RPF1	FALSE		FALSE		FALSE		FALSE		FALSE
HMOX2	FALSE		FALSE		FALSE		FALSE		FALSE
EIF2S1	FALSE		FALSE		FALSE		FALSE		FALSE
LLGL1	FALSE		FALSE		FALSE		FALSE		FALSE
FKBP5	FALSE		FALSE		FALSE		FALSE		FALSE
TKFC	FALSE		FALSE		FALSE		FALSE		FALSE
ADAT3	FALSE		FALSE		FALSE		FALSE		FALSE
AGRN	FALSE		FALSE		FALSE		FALSE		FALSE
CDC20	FALSE		FALSE		FALSE		FALSE		FALSE
SYVN1	FALSE		FALSE		FALSE		FALSE		FALSE
MEN1	FALSE		FALSE		FALSE		FALSE		FALSE
VPS51	FALSE		FALSE		FALSE		FALSE		FALSE
NAPG	FALSE		FALSE		FALSE		FALSE		FALSE
VAT1	FALSE		FALSE		FALSE		FALSE		FALSE
GLYR1	FALSE		FALSE		FALSE		FALSE		FALSE
VMP1	FALSE		FALSE		FALSE		FALSE		FALSE
ALB	FALSE		FALSE		FALSE		FALSE		FALSE
VPS53	FALSE		FALSE		FALSE		FALSE		FALSE
UGGT1	FALSE		FALSE		FALSE		FALSE		FALSE
GSTK1	FALSE		FALSE		FALSE		FALSE		FALSE
KDM3B	FALSE		FALSE		FALSE		FALSE		FALSE
MTX2	FALSE		FALSE		FALSE		FALSE		FALSE
SLU7	FALSE		FALSE		FALSE		FALSE		FALSE
KPNA2	FALSE		FALSE		FALSE		FALSE		FALSE
CARM1	FALSE		FALSE		FALSE		FALSE		FALSE
JMJD6	FALSE		FALSE		FALSE		FALSE		FALSE
MED27	FALSE		FALSE		FALSE		FALSE		FALSE
SPTB	FALSE		FALSE		FALSE		FALSE		FALSE
EMG1	FALSE		FALSE		FALSE		FALSE		FALSE
ELOF1	FALSE		FALSE		FALSE		FALSE		FALSE
UBQLN4	FALSE		FALSE		FALSE		FALSE		FALSE
PLAA	FALSE		FALSE		FALSE		FALSE		FALSE
NIF3L1	FALSE		FALSE		FALSE		FALSE		FALSE
CTNNA2	FALSE		FALSE		FALSE		FALSE		FALSE
ISCA2	FALSE		FALSE		FALSE		FALSE		FALSE
RARS1	FALSE		FALSE		FALSE		FALSE		FALSE
CLINT1	FALSE		FALSE		FALSE		FALSE		FALSE
NCBP1	FALSE		FALSE		FALSE		FALSE		FALSE
HTRA2	FALSE		FALSE		FALSE		FALSE		FALSE
ZMAT2	FALSE		FALSE		FALSE		FALSE		FALSE
NIFK	FALSE		FALSE		FALSE		FALSE		FALSE
DDX20	FALSE		FALSE		FALSE		FALSE		FALSE
EIF2B2	FALSE		FALSE		FALSE		FALSE		FALSE
COASY	FALSE		FALSE		FALSE		FALSE		FALSE
GAK	FALSE		FALSE		FALSE		FALSE		FALSE
XPNPEP1	FALSE		FALSE		FALSE		FALSE		FALSE
MIS18BP1	FALSE		FALSE		FALSE		FALSE		FALSE
PRPS1	FALSE		FALSE		FALSE		FALSE		FALSE
KLC4	FALSE		FALSE		FALSE		FALSE		FALSE
BLOC1S3	FALSE		FALSE		FALSE		FALSE		FALSE
MNAT1	FALSE		FALSE		FALSE		FALSE		FALSE
RAB5C	TRUE		FALSE		FALSE		FALSE		FALSE
OGT	FALSE		FALSE		FALSE		FALSE		FALSE
H3-5	FALSE		FALSE		FALSE		FALSE		FALSE
CSTF2T	FALSE		FALSE		FALSE		FALSE		FALSE
NIPSNAP1	FALSE		FALSE		FALSE		FALSE		FALSE
HGS	FALSE		FALSE		FALSE		FALSE		FALSE
PPFIBP1	FALSE		FALSE		FALSE		FALSE		FALSE
ZC3H8	FALSE		FALSE		FALSE		FALSE		FALSE
FAM120A	FALSE		FALSE		FALSE		FALSE		FALSE
STAT3	FALSE		FALSE		FALSE		FALSE		FALSE
TBRG4	FALSE		FALSE		FALSE		FALSE		FALSE
VIRMA	FALSE		FALSE		FALSE		FALSE		FALSE
COTL1	FALSE		FALSE		FALSE		FALSE		FALSE
VPS18	FALSE		FALSE		FALSE		FALSE		FALSE
HSP90AB2P	FALSE		FALSE		FALSE		FALSE		FALSE
RHOT2	FALSE		FALSE		FALSE		FALSE		FALSE
GNA14	FALSE		FALSE		FALSE		FALSE		FALSE
NOM1	FALSE		FALSE		FALSE		FALSE		FALSE
CYC1	TRUE		FALSE		FALSE		FALSE		FALSE
AAAS	FALSE		FALSE		FALSE		FALSE		FALSE
MICU1	FALSE		FALSE		FALSE		FALSE		FALSE
HCK	FALSE		FALSE		FALSE		FALSE		FALSE
YTHDC2	FALSE		FALSE		FALSE		FALSE		FALSE
HSP90AA2P	FALSE		FALSE		FALSE		FALSE		FALSE
PGRMC2	FALSE		FALSE		FALSE		FALSE		FALSE
MPI	FALSE		FALSE		FALSE		FALSE		FALSE
GALNT1	FALSE		FALSE		FALSE		FALSE		FALSE
TP53BP1	FALSE		FALSE		FALSE		FALSE		FALSE
C17orf80	FALSE		FALSE		FALSE		FALSE		FALSE
CCDC6	FALSE		FALSE		FALSE		FALSE		FALSE
GANAB	FALSE		FALSE		FALSE		FALSE		FALSE
ACADS	FALSE		FALSE		FALSE		FALSE		FALSE
GRN	TRUE		FALSE		FALSE		FALSE		FALSE
IVD	FALSE		FALSE		FALSE		FALSE		FALSE
TARS2	FALSE		FALSE		FALSE		FALSE		FALSE
CCDC106	FALSE		FALSE		FALSE		FALSE		FALSE
MAEA	FALSE		FALSE		FALSE		FALSE		FALSE
PSMG1	FALSE		FALSE		FALSE		FALSE		FALSE
CKS1B	FALSE		FALSE		FALSE		FALSE		FALSE
GRPEL1	FALSE		FALSE		FALSE		FALSE		FALSE
STX7	FALSE		FALSE		FALSE		FALSE		FALSE
TRIP6	FALSE		FALSE		FALSE		FALSE		FALSE
CYB5B	FALSE		FALSE		FALSE		FALSE		FALSE
GRSF1	FALSE		FALSE		FALSE		FALSE		FALSE
EIF2S2	FALSE		FALSE		FALSE		FALSE		FALSE
GOLPH3	FALSE		FALSE		FALSE		FALSE		FALSE
EXOSC2	FALSE		FALSE		FALSE		FALSE		FALSE
TMEM87A	FALSE		FALSE		FALSE		FALSE		FALSE
PRIM2	FALSE		FALSE		FALSE		FALSE		FALSE
PDLIM1	FALSE		FALSE		FALSE		FALSE		FALSE
ISYNA1	FALSE		FALSE		FALSE		FALSE		FALSE
APOOL	FALSE		FALSE		FALSE		FALSE		FALSE
MAPRE1	FALSE		FALSE		FALSE		FALSE		FALSE
DDX47	FALSE		FALSE		FALSE		FALSE		FALSE
CDKN2AIPNL	FALSE		FALSE		FALSE		FALSE		FALSE
HMG20B	FALSE		FALSE		FALSE		FALSE		FALSE
EXOSC3	FALSE		FALSE		FALSE		FALSE		FALSE
CRTAP	FALSE		FALSE		FALSE		FALSE		FALSE
RSL1D1	FALSE		FALSE		FALSE		FALSE		FALSE
EXOC5	FALSE		FALSE		FALSE		FALSE		FALSE
FKBP8	FALSE		FALSE		FALSE		FALSE		FALSE
SUPT16H	FALSE		FALSE		FALSE		FALSE		FALSE
PES1	TRUE		FALSE		FALSE		FALSE		FALSE
CAMK1	FALSE		FALSE		FALSE		FALSE		FALSE
MARS1	FALSE		FALSE		FALSE		FALSE		FALSE
AKT1	FALSE		FALSE		FALSE		FALSE		FALSE
CTSA	FALSE		FALSE		FALSE		FALSE		FALSE
THOC3	FALSE		FALSE		FALSE		FALSE		FALSE
HIP1R	FALSE		FALSE		FALSE		FALSE		FALSE
WRAP53	FALSE		FALSE		FALSE		FALSE		FALSE
SEH1L	FALSE		FALSE		FALSE		FALSE		FALSE
PRIM1	FALSE		FALSE		FALSE		FALSE		FALSE
FARSB	FALSE		FALSE		FALSE		FALSE		FALSE
PRKAA1	FALSE		FALSE		FALSE		FALSE		FALSE
CAMK2G	FALSE		FALSE		FALSE		FALSE		FALSE
IMPDH1	FALSE		FALSE		FALSE		FALSE		FALSE
GEMIN4	FALSE		FALSE		FALSE		FALSE		FALSE
CHID1	FALSE		FALSE		FALSE		FALSE		FALSE
DIAPH1	FALSE		FALSE		FALSE		FALSE		FALSE
STK10	FALSE		FALSE		FALSE		FALSE		FALSE
LYPLA2	FALSE		FALSE		FALSE		FALSE		FALSE
ATP5F1B	FALSE		FALSE		FALSE		FALSE		FALSE
ILVBL	TRUE		FALSE		FALSE		FALSE		FALSE
TMEM259	FALSE		FALSE		FALSE		FALSE		FALSE
PSMC4	FALSE		FALSE		FALSE		FALSE		FALSE
HNRNPA0	FALSE		FALSE		FALSE		FALSE		FALSE
RCC1L	FALSE		FALSE		FALSE		FALSE		FALSE
MYEF2	FALSE		FALSE		FALSE		FALSE		FALSE
RUFY1	FALSE		FALSE		FALSE		FALSE		FALSE
RBM25	FALSE		FALSE		FALSE		FALSE		FALSE
UTP20	FALSE		FALSE		FALSE		FALSE		FALSE
CDCA3	FALSE		FALSE		FALSE		FALSE		FALSE
HIRIP3	FALSE		FALSE		FALSE		FALSE		FALSE
ALKBH5	FALSE		FALSE		FALSE		FALSE		FALSE
ENSA	FALSE		FALSE		FALSE		FALSE		FALSE
CCAR2	FALSE		FALSE		FALSE		FALSE		FALSE
NT5C3A	FALSE		FALSE		FALSE		FALSE		FALSE
UBQLN1	FALSE		FALSE		FALSE		FALSE		FALSE
SYNJ2BP	FALSE		FALSE		FALSE		FALSE		FALSE
UBALD1	FALSE		FALSE		FALSE		FALSE		FALSE
RRM1	FALSE		FALSE		FALSE		FALSE		FALSE
RDH14	FALSE		FALSE		FALSE		FALSE		FALSE
PLA2G4D	FALSE		FALSE		FALSE		FALSE		FALSE
NME3	FALSE		FALSE		FALSE		FALSE		FALSE
LMBRD2	FALSE		FALSE		FALSE		FALSE		FALSE
SRP68	FALSE		FALSE		FALSE		FALSE		FALSE
AGFG1	FALSE		FALSE		FALSE		FALSE		FALSE
BAIAP2L1	FALSE		FALSE		FALSE		FALSE		FALSE
EXOC1	FALSE		FALSE		FALSE		FALSE		FALSE
TASOR	FALSE		FALSE		FALSE		FALSE		FALSE
ACIN1	FALSE		FALSE		FALSE		FALSE		FALSE
MYO1D	FALSE		FALSE		FALSE		FALSE		FALSE
RPS5	TRUE		FALSE		FALSE		FALSE		FALSE
CORO6	FALSE		FALSE		FALSE		FALSE		FALSE
CHD1	FALSE		FALSE		FALSE		FALSE		FALSE
GNA11	FALSE		FALSE		FALSE		FALSE		FALSE
CKB	TRUE		FALSE		FALSE		FALSE		FALSE
HSP90AB4P	FALSE		FALSE		FALSE		FALSE		FALSE
MED15	FALSE		FALSE		FALSE		FALSE		FALSE
ASPH	FALSE		FALSE		FALSE		FALSE		FALSE
GLE1	FALSE		FALSE		FALSE		FALSE		FALSE
ZC3H13	FALSE		FALSE		FALSE		FALSE		FALSE
MACF1	FALSE		FALSE		FALSE		FALSE		FALSE
PSIP1	FALSE		FALSE		FALSE		FALSE		FALSE
CIZ1	FALSE		FALSE		FALSE		FALSE		FALSE
ARSA	FALSE		FALSE		FALSE		FALSE		FALSE
SSR1	FALSE		FALSE		FALSE		FALSE		FALSE
UTP18	FALSE		FALSE		FALSE		FALSE		FALSE
ACBD5	FALSE		FALSE		FALSE		FALSE		FALSE
PCCB	FALSE		FALSE		FALSE		FALSE		FALSE
SLC4A2	FALSE		FALSE		FALSE		FALSE		FALSE
FAU	FALSE		FALSE		FALSE		FALSE		FALSE
NKIRAS2	FALSE		FALSE		FALSE		FALSE		FALSE
ARPC1B	FALSE		FALSE		FALSE		FALSE		FALSE
UGP2	FALSE		FALSE		FALSE		FALSE		FALSE
PSME2	FALSE		FALSE		FALSE		FALSE		FALSE
WRNIP1	FALSE		FALSE		FALSE		FALSE		FALSE
DMD	FALSE		FALSE		FALSE		FALSE		FALSE
TAOK2	FALSE		FALSE		FALSE		FALSE		FALSE
HSP90AB1	FALSE		FALSE		FALSE		FALSE		FALSE
PTK7	FALSE		FALSE		FALSE		FALSE		FALSE
ZNF768	FALSE		FALSE		FALSE		FALSE		FALSE
FLAD1	FALSE		FALSE		FALSE		FALSE		FALSE
PURA	FALSE		FALSE		FALSE		FALSE		FALSE
RSL24D1	FALSE		FALSE		FALSE		FALSE		FALSE
SUN2	FALSE		FALSE		FALSE		FALSE		FALSE
GSS	FALSE		FALSE		FALSE		FALSE		FALSE
NUP210	FALSE		FALSE		FALSE		FALSE		FALSE
GTF3C1	FALSE		FALSE		FALSE		FALSE		FALSE
LETM1	FALSE		FALSE		FALSE		FALSE		FALSE
L2HGDH	FALSE		FALSE		FALSE		FALSE		FALSE
MRTO4	FALSE		FALSE		FALSE		FALSE		FALSE
TRIP11	FALSE		FALSE		FALSE		FALSE		FALSE
GSK3B	FALSE		FALSE		FALSE		FALSE		FALSE
COX5A	TRUE		FALSE		FALSE		FALSE		FALSE
SNW1	FALSE		FALSE		FALSE		FALSE		FALSE
ZC3H14	FALSE		FALSE		FALSE		FALSE		FALSE
ZCCHC8	FALSE		FALSE		FALSE		FALSE		FALSE
GNPAT	FALSE		FALSE		FALSE		FALSE		FALSE
POLR2B	FALSE		FALSE		FALSE		FALSE		FALSE
NSMCE3	FALSE		FALSE		FALSE		FALSE		FALSE
LUZP1	FALSE		FALSE		FALSE		FALSE		FALSE
EMC10	TRUE		FALSE		FALSE		FALSE		FALSE
ACADVL	TRUE		FALSE		FALSE		FALSE		FALSE
NEURL4	FALSE		FALSE		FALSE		FALSE		FALSE
OSBP	FALSE		FALSE		FALSE		FALSE		FALSE
EIF6	TRUE		FALSE		FALSE		FALSE		FALSE
RPL12	FALSE		FALSE		FALSE		FALSE		FALSE
TCERG1	FALSE		FALSE		FALSE		FALSE		FALSE
BECN1	FALSE		FALSE		FALSE		FALSE		FALSE
NFU1	FALSE		FALSE		FALSE		FALSE		FALSE
PML	FALSE		FALSE		FALSE		FALSE		FALSE
PSMB1	TRUE		FALSE		FALSE		FALSE		FALSE
ATP2A1	FALSE		FALSE		FALSE		FALSE		FALSE
CDCA8	FALSE		FALSE		FALSE		FALSE		FALSE
GFER	FALSE		FALSE		FALSE		FALSE		FALSE
TCOF1	FALSE		FALSE		FALSE		FALSE		FALSE
SNX6	FALSE		FALSE		FALSE		FALSE		FALSE
RBBP7	FALSE		FALSE		FALSE		FALSE		FALSE
SUGT1	FALSE		FALSE		FALSE		FALSE		FALSE
EIF4ENIF1	FALSE		FALSE		FALSE		FALSE		FALSE
TAF1	FALSE		FALSE		FALSE		FALSE		FALSE
NUDT9	FALSE		FALSE		FALSE		FALSE		FALSE
NELFB	FALSE		FALSE		FALSE		FALSE		FALSE
CCDC167	TRUE		FALSE		FALSE		FALSE		FALSE
PI4K2A	FALSE		FALSE		FALSE		FALSE		FALSE
UBXN6	FALSE		FALSE		FALSE		FALSE		FALSE
RPL13AP3	FALSE		FALSE		FALSE		FALSE		FALSE
HAUS8	FALSE		FALSE		FALSE		FALSE		FALSE
SDAD1	FALSE		FALSE		FALSE		FALSE		FALSE
RPS21	TRUE		FALSE		FALSE		FALSE		FALSE
BAK1	FALSE		FALSE		FALSE		FALSE		FALSE
DNTTIP2	FALSE		FALSE		FALSE		FALSE		FALSE
CLCC1	FALSE		FALSE		FALSE		FALSE		FALSE
MAPK1	FALSE		FALSE		FALSE		FALSE		FALSE
PSMA8	FALSE		FALSE		FALSE		FALSE		FALSE
KIN	FALSE		FALSE		FALSE		FALSE		FALSE
COPG2	FALSE		FALSE		FALSE		FALSE		FALSE
ZNF318	FALSE		FALSE		FALSE		FALSE		FALSE
PAK1IP1	FALSE		FALSE		FALSE		FALSE		FALSE
RRP36	FALSE		FALSE		FALSE		FALSE		FALSE
NDUFB5	FALSE		FALSE		FALSE		FALSE		FALSE
OAT	FALSE		FALSE		FALSE		FALSE		FALSE
PSMB7	TRUE		FALSE		FALSE		FALSE		FALSE
EXOC2	FALSE		FALSE		FALSE		FALSE		FALSE
EGFR	FALSE		FALSE		FALSE		FALSE		FALSE
USP10	FALSE		FALSE		FALSE		FALSE		FALSE
RPS15	FALSE		FALSE		FALSE		FALSE		FALSE
CHP1	FALSE		FALSE		FALSE		FALSE		FALSE
ABCF1	FALSE		FALSE		FALSE		FALSE		FALSE
TFRC	FALSE		FALSE		FALSE		FALSE		FALSE
RPL4	FALSE		FALSE		FALSE		FALSE		FALSE
IMP3	FALSE		FALSE		FALSE		FALSE		FALSE
GOLGA5	FALSE		FALSE		FALSE		FALSE		FALSE
VTI1A	FALSE		FALSE		FALSE		FALSE		FALSE
GCC2	FALSE		FALSE		FALSE		FALSE		FALSE
HSP90AA1	FALSE		FALSE		FALSE		FALSE		FALSE
CDCA7L	FALSE		FALSE		FALSE		FALSE		FALSE
RETREG3	FALSE		FALSE		FALSE		FALSE		FALSE
FANCI	FALSE		FALSE		FALSE		FALSE		FALSE
ZNF207	FALSE		FALSE		FALSE		FALSE		FALSE
TXNDC12	FALSE		FALSE		FALSE		FALSE		FALSE
VPS50	FALSE		FALSE		FALSE		FALSE		FALSE
SCYL1	FALSE		FALSE		FALSE		FALSE		FALSE
DIS3	FALSE		FALSE		FALSE		FALSE		FALSE
SFXN1	FALSE		FALSE		FALSE		FALSE		FALSE
SNX3	FALSE		FALSE		FALSE		FALSE		FALSE
GBA	FALSE		FALSE		FALSE		FALSE		FALSE
CCDC137	FALSE		FALSE		FALSE		FALSE		FALSE
LTV1	FALSE		FALSE		FALSE		FALSE		FALSE
PAFAH1B3	TRUE		FALSE		FALSE		FALSE		FALSE
RPA2	FALSE		FALSE		FALSE		FALSE		FALSE
MIS18A	FALSE		FALSE		FALSE		FALSE		FALSE
RCL1	FALSE		FALSE		FALSE		FALSE		FALSE
MAN2B1	FALSE		FALSE		FALSE		FALSE		FALSE
SNU13	FALSE		FALSE		FALSE		FALSE		FALSE
PSMA6	FALSE		FALSE		FALSE		FALSE		FALSE
STX6	FALSE		FALSE		FALSE		FALSE		FALSE
RRAS	FALSE		FALSE		FALSE		FALSE		FALSE
DNAJC7	FALSE		FALSE		FALSE		FALSE		FALSE
MACROH2A2	FALSE		FALSE		FALSE		FALSE		FALSE
TOMM22	TRUE		FALSE		FALSE		FALSE		FALSE
SV2A	FALSE		FALSE		FALSE		FALSE		FALSE
PUM3	FALSE		FALSE		FALSE		FALSE		FALSE
AFDN	FALSE		FALSE		FALSE		FALSE		FALSE
ACTR1B	FALSE		FALSE		FALSE		FALSE		FALSE
GTF3C4	FALSE		FALSE		FALSE		FALSE		FALSE
FLII	FALSE		FALSE		FALSE		FALSE		FALSE
LGALS3BP	TRUE		FALSE		FALSE		FALSE		FALSE
WDHD1	FALSE		FALSE		FALSE		FALSE		FALSE
VAMP7	FALSE		FALSE		FALSE		FALSE		FALSE
DHX30	FALSE		FALSE		FALSE		FALSE		FALSE
ACOT9	FALSE		FALSE		FALSE		FALSE		FALSE
PABPC4	FALSE		FALSE		FALSE		FALSE		FALSE
PTDSS2	FALSE		FALSE		FALSE		FALSE		FALSE
URB2	FALSE		FALSE		FALSE		FALSE		FALSE
CCDC124	TRUE		FALSE		FALSE		FALSE		FALSE
MAK16	FALSE		FALSE		FALSE		FALSE		FALSE
NOL10	FALSE		FALSE		FALSE		FALSE		FALSE
SHMT2	TRUE		FALSE		FALSE		FALSE		FALSE
DDX28	FALSE		FALSE		FALSE		FALSE		FALSE
QARS1	FALSE		FALSE		FALSE		FALSE		FALSE
NUS1	FALSE		FALSE		FALSE		FALSE		FALSE
KIFBP	FALSE		FALSE		FALSE		FALSE		FALSE
STX12	FALSE		FALSE		FALSE		FALSE		FALSE
MAP2K4	FALSE		FALSE		FALSE		FALSE		FALSE
MANF	TRUE		FALSE		FALSE		FALSE		FALSE
LRCH2	FALSE		FALSE		FALSE		FALSE		FALSE
ACACB	FALSE		FALSE		FALSE		FALSE		FALSE
CLTC	FALSE		FALSE		FALSE		FALSE		FALSE
TMOD3	FALSE		FALSE		FALSE		FALSE		FALSE
NEFM	FALSE		FALSE		FALSE		FALSE		FALSE
STX5	FALSE		FALSE		FALSE		FALSE		FALSE
SMPD4	FALSE		FALSE		FALSE		FALSE		FALSE
PRPSAP2	FALSE		FALSE		FALSE		FALSE		FALSE
NR2F1	FALSE		FALSE		FALSE		FALSE		FALSE
BZW2	FALSE		FALSE		FALSE		FALSE		FALSE
MCM3AP	FALSE		FALSE		FALSE		FALSE		FALSE
DHX16	FALSE		FALSE		FALSE		FALSE		FALSE
NDUFB10	TRUE		FALSE		FALSE		FALSE		FALSE
DDX41	FALSE		FALSE		FALSE		FALSE		FALSE
CCT3	TRUE		FALSE		FALSE		FALSE		FALSE
YLPM1	FALSE		FALSE		FALSE		FALSE		FALSE
MAP1S	FALSE		FALSE		FALSE		FALSE		FALSE
SPCS2	FALSE		FALSE		FALSE		FALSE		FALSE
ARL6IP1	FALSE		FALSE		FALSE		FALSE		FALSE
BAG6	FALSE		FALSE		FALSE		FALSE		FALSE
MSH3	FALSE		FALSE		FALSE		FALSE		FALSE
KIAA2013	FALSE		FALSE		FALSE		FALSE		FALSE
ITPR2	FALSE		FALSE		FALSE		FALSE		FALSE
SERBP1	FALSE		FALSE		FALSE		FALSE		FALSE
TEX10	FALSE		FALSE		FALSE		FALSE		FALSE
CHCHD3	FALSE		FALSE		FALSE		FALSE		FALSE
HSD17B4	FALSE		FALSE		FALSE		FALSE		FALSE
XAB2	FALSE		FALSE		FALSE		FALSE		FALSE
PRPSAP1	FALSE		FALSE		FALSE		FALSE		FALSE
HSP90AB3P	FALSE		FALSE		FALSE		FALSE		FALSE
RPSA	FALSE		FALSE		FALSE		FALSE		FALSE
RPL11	TRUE		FALSE		FALSE		FALSE		FALSE
PEX3	FALSE		FALSE		FALSE		FALSE		FALSE
SYNCRIP	FALSE		FALSE		FALSE		FALSE		FALSE
LYN	FALSE		FALSE		FALSE		FALSE		FALSE
DPAGT1	FALSE		FALSE		FALSE		FALSE		FALSE
UBQLN2	FALSE		FALSE		FALSE		FALSE		FALSE
EXOSC5	FALSE		FALSE		FALSE		FALSE		FALSE
TAB2	FALSE		FALSE		FALSE		FALSE		FALSE
TMEM209	FALSE		FALSE		FALSE		FALSE		FALSE
DUT	FALSE		FALSE		FALSE		FALSE		FALSE
IGF2BP2	FALSE		FALSE		FALSE		FALSE		FALSE
VKORC1	TRUE		FALSE		FALSE		FALSE		FALSE
RFX1	FALSE		FALSE		FALSE		FALSE		FALSE
GLS	FALSE		FALSE		FALSE		FALSE		FALSE
DDX49	TRUE		FALSE		FALSE		FALSE		FALSE
VDAC1	FALSE		FALSE		FALSE		FALSE		FALSE
NR2F2	FALSE		FALSE		FALSE		FALSE		FALSE
VCP	FALSE		FALSE		FALSE		FALSE		FALSE
AHSG	FALSE		FALSE		FALSE		FALSE		FALSE
RPL24	TRUE		FALSE		FALSE		FALSE		FALSE
DSC3	FALSE		FALSE		FALSE		FALSE		FALSE
EXOSC10	FALSE		FALSE		FALSE		FALSE		FALSE
ABT1	FALSE		FALSE		FALSE		FALSE		FALSE
ATP12A	FALSE		FALSE		FALSE		FALSE		FALSE
COA7	FALSE		FALSE		FALSE		FALSE		FALSE
CDK5RAP3	FALSE		FALSE		FALSE		FALSE		FALSE
RPS23	TRUE		FALSE		FALSE		FALSE		FALSE
TXLNG	FALSE		FALSE		FALSE		FALSE		FALSE
GART	FALSE		FALSE		FALSE		FALSE		FALSE
PSMC6	FALSE		FALSE		FALSE		FALSE		FALSE
NUP35	FALSE		FALSE		FALSE		FALSE		FALSE
TSPYL1	FALSE		FALSE		FALSE		FALSE		FALSE
SCAF8	FALSE		FALSE		FALSE		FALSE		FALSE
VPS4B	FALSE		FALSE		FALSE		FALSE		FALSE
GOSR1	FALSE		FALSE		FALSE		FALSE		FALSE
ACTR1A	FALSE		FALSE		FALSE		FALSE		FALSE
ATP4A	FALSE		FALSE		FALSE		FALSE		FALSE
NDUFAF7	FALSE		FALSE		FALSE		FALSE		FALSE
CRYZ	FALSE		FALSE		FALSE		FALSE		FALSE
AATF	FALSE		FALSE		FALSE		FALSE		FALSE
YIPF6	FALSE		FALSE		FALSE		FALSE		FALSE
CCT6A	FALSE		FALSE		FALSE		FALSE		FALSE
RPS2	FALSE		FALSE		FALSE		FALSE		FALSE
ATP2A2	FALSE		FALSE		FALSE		FALSE		FALSE
TARS1	FALSE		FALSE		FALSE		FALSE		FALSE
FLOT2	FALSE		FALSE		FALSE		FALSE		FALSE
RPS29	TRUE		FALSE		FALSE		FALSE		FALSE
IMMT	FALSE		FALSE		FALSE		FALSE		FALSE
G3BP1	FALSE		FALSE		FALSE		FALSE		FALSE
GSPT1	FALSE		FALSE		FALSE		FALSE		FALSE
HAGH	FALSE		FALSE		FALSE		FALSE		FALSE
STXBP2	FALSE		FALSE		FALSE		FALSE		FALSE
POLR1D	FALSE		FALSE		FALSE		FALSE		FALSE
PIK3C2A	FALSE		FALSE		FALSE		FALSE		FALSE
MRPL10	FALSE		FALSE		FALSE		FALSE		FALSE
PAF1	FALSE		FALSE		FALSE		FALSE		FALSE
PDLIM5	FALSE		FALSE		FALSE		FALSE		FALSE
MKRN2	FALSE		FALSE		FALSE		FALSE		FALSE
KIAA1522	FALSE		FALSE		FALSE		FALSE		FALSE
ACSF2	FALSE		FALSE		FALSE		FALSE		FALSE
P3H3	FALSE		FALSE		FALSE		FALSE		FALSE
UTP14A	FALSE		FALSE		FALSE		FALSE		FALSE
PHF14	FALSE		FALSE		FALSE		FALSE		FALSE
INTS9	FALSE		FALSE		FALSE		FALSE		FALSE
WIZ	FALSE		FALSE		FALSE		FALSE		FALSE
RPS19	TRUE		FALSE		FALSE		FALSE		FALSE
EPRS1	FALSE		FALSE		FALSE		FALSE		FALSE
RPLP1	TRUE		FALSE		FALSE		FALSE		FALSE
PARD3	FALSE		FALSE		FALSE		FALSE		FALSE
MTCH2	FALSE		FALSE		FALSE		FALSE		FALSE
PHF3	FALSE		FALSE		FALSE		FALSE		FALSE
GGA1	FALSE		FALSE		FALSE		FALSE		FALSE
FKBP2	TRUE		FALSE		FALSE		FALSE		FALSE
DDX19B	FALSE		FALSE		FALSE		FALSE		FALSE
NEFL	FALSE		FALSE		FALSE		FALSE		FALSE
CCDC51	FALSE		FALSE		FALSE		FALSE		FALSE
SON	FALSE		FALSE		FALSE		FALSE		FALSE
SPTLC2	FALSE		FALSE		FALSE		FALSE		FALSE
KDM2A	FALSE		FALSE		FALSE		FALSE		FALSE
BAZ1B	FALSE		FALSE		FALSE		FALSE		FALSE
MFF	FALSE		FALSE		FALSE		FALSE		FALSE
FNBP1L	FALSE		FALSE		FALSE		FALSE		FALSE
DDX10	FALSE		FALSE		FALSE		FALSE		FALSE
GSPT2	FALSE		FALSE		FALSE		FALSE		FALSE
EXOSC7	FALSE		FALSE		FALSE		FALSE		FALSE
DNAJB11	FALSE		FALSE		FALSE		FALSE		FALSE
HOOK1	FALSE		FALSE		FALSE		FALSE		FALSE
KMT2A	FALSE		FALSE		FALSE		FALSE		FALSE
SDR39U1	FALSE		FALSE		FALSE		FALSE		FALSE
INA	FALSE		FALSE		FALSE		FALSE		FALSE
PSMB5	TRUE		FALSE		FALSE		FALSE		FALSE
NUP93	FALSE		FALSE		FALSE		FALSE		FALSE
SLC25A13	FALSE		FALSE		FALSE		FALSE		FALSE
RRP8	FALSE		FALSE		FALSE		FALSE		FALSE
EXOSC9	FALSE		FALSE		FALSE		FALSE		FALSE
POLG	FALSE		FALSE		FALSE		FALSE		FALSE
CPT2	FALSE		FALSE		FALSE		FALSE		FALSE
RPS3A	FALSE		FALSE		FALSE		FALSE		FALSE
RPL7A	FALSE		FALSE		FALSE		FALSE		FALSE
PNO1	FALSE		FALSE		FALSE		FALSE		FALSE
BYSL	FALSE		FALSE		FALSE		FALSE		FALSE
ALDH3A2	FALSE		FALSE		FALSE		FALSE		FALSE
ATAD2B	FALSE		FALSE		FALSE		FALSE		FALSE
MRPS17	FALSE		FALSE		FALSE		FALSE		FALSE
PRDX3	FALSE		FALSE		FALSE		FALSE		FALSE
RPL32	FALSE		FALSE		FALSE		FALSE		FALSE
NOP56	FALSE		FALSE		FALSE		FALSE		FALSE
UTP6	FALSE		FALSE		FALSE		FALSE		FALSE
NIPBL	FALSE		FALSE		FALSE		FALSE		FALSE
LARS1	FALSE		FALSE		FALSE		FALSE		FALSE
SRGAP2	FALSE		FALSE		FALSE		FALSE		FALSE
MPHOSPH10	FALSE		FALSE		FALSE		FALSE		FALSE
GTF3C5	FALSE		FALSE		FALSE		FALSE		FALSE
SINHCAF	FALSE		FALSE		FALSE		FALSE		FALSE
PSMB4	TRUE		FALSE		FALSE		FALSE		FALSE
PPP1CC	FALSE		FALSE		FALSE		FALSE		FALSE
RHOT1	FALSE		FALSE		FALSE		FALSE		FALSE
MED23	FALSE		FALSE		FALSE		FALSE		FALSE
MPST	FALSE		FALSE		FALSE		FALSE		FALSE
HLA-B	TRUE		FALSE		FALSE		FALSE		FALSE
MICOS13	FALSE		FALSE		FALSE		FALSE		FALSE
ATL1	FALSE		FALSE		FALSE		FALSE		FALSE
SCAF4	FALSE		FALSE		FALSE		FALSE		FALSE
PDIA3	FALSE		FALSE		FALSE		FALSE		FALSE
RPS6	TRUE		FALSE		FALSE		FALSE		FALSE
SRP72	FALSE		FALSE		FALSE		FALSE		FALSE
DNAJC19	FALSE		FALSE		FALSE		FALSE		FALSE
HDHD5	FALSE		FALSE		FALSE		FALSE		FALSE
CNPY3	FALSE		FALSE		FALSE		FALSE		FALSE
MAGOH	FALSE		FALSE		FALSE		FALSE		FALSE
MAGOHB	FALSE		FALSE		FALSE		FALSE		FALSE
SCAMP3	TRUE		FALSE		FALSE		FALSE		FALSE
CCT6B	FALSE		FALSE		FALSE		FALSE		FALSE
MINK1	FALSE		FALSE		FALSE		FALSE		FALSE
POLR1G	FALSE		FALSE		FALSE		FALSE		FALSE
FUS	TRUE		FALSE		FALSE		FALSE		FALSE
TOP2B	FALSE		FALSE		FALSE		FALSE		FALSE
SLC25A12	FALSE		FALSE		FALSE		FALSE		FALSE
PTPRF	FALSE		FALSE		FALSE		FALSE		FALSE
RAB3GAP2	FALSE		FALSE		FALSE		FALSE		FALSE
SPECC1L	FALSE		FALSE		FALSE		FALSE		FALSE
CAMLG	FALSE		FALSE		FALSE		FALSE		FALSE
NPEPPSL1	FALSE		FALSE		FALSE		FALSE		FALSE
AIMP1	FALSE		FALSE		FALSE		FALSE		FALSE
LEMD3	FALSE		FALSE		FALSE		FALSE		FALSE
TNIK	FALSE		FALSE		FALSE		FALSE		FALSE
AASS	FALSE		FALSE		FALSE		FALSE		FALSE
MYO19	FALSE		FALSE		FALSE		FALSE		FALSE
DDX18	FALSE		FALSE		FALSE		FALSE		FALSE
PTGFRN	FALSE		FALSE		FALSE		FALSE		FALSE
RRP15	FALSE		FALSE		FALSE		FALSE		FALSE
RPL13A	FALSE		FALSE		FALSE		FALSE		FALSE
FAM207A	FALSE		FALSE		FALSE		FALSE		FALSE
TMF1	FALSE		FALSE		FALSE		FALSE		FALSE
POLR2A	FALSE		FALSE		FALSE		FALSE		FALSE
MIB1	FALSE		FALSE		FALSE		FALSE		FALSE
MATR3	FALSE		FALSE		FALSE		FALSE		FALSE
SEPTIN2	FALSE		FALSE		FALSE		FALSE		FALSE
BRD8	FALSE		FALSE		FALSE		FALSE		FALSE
ECSIT	FALSE		FALSE		FALSE		FALSE		FALSE
SRP19	FALSE		FALSE		FALSE		FALSE		FALSE
PARP2	FALSE		FALSE		FALSE		FALSE		FALSE
HERC2	FALSE		FALSE		FALSE		FALSE		FALSE
SAMM50	FALSE		FALSE		FALSE		FALSE		FALSE
NEDD8	TRUE		FALSE		FALSE		FALSE		FALSE
CPSF3	FALSE		FALSE		FALSE		FALSE		FALSE
RBM22	FALSE		FALSE		FALSE		FALSE		FALSE
EXOSC1	FALSE		FALSE		FALSE		FALSE		FALSE
WDR1	FALSE		FALSE		FALSE		FALSE		FALSE
DAG1	FALSE		FALSE		FALSE		FALSE		FALSE
CORO1C	FALSE		FALSE		FALSE		FALSE		FALSE
OGA	FALSE		FALSE		FALSE		FALSE		FALSE
GTPBP6	FALSE		FALSE		FALSE		FALSE		FALSE
POLR2E	FALSE		FALSE		FALSE		FALSE		FALSE
AGK	FALSE		FALSE		FALSE		FALSE		FALSE
BIRC6	FALSE		FALSE		FALSE		FALSE		FALSE
GFM1	FALSE		FALSE		FALSE		FALSE		FALSE
NUP42	FALSE		FALSE		FALSE		FALSE		FALSE
ATP5MG	FALSE		FALSE		FALSE		FALSE		FALSE
RPL17	FALSE		FALSE		FALSE		FALSE		FALSE
AHCY	FALSE		FALSE		FALSE		FALSE		FALSE
IGBP1	FALSE		FALSE		FALSE		FALSE		FALSE
PPP1R12C	FALSE		FALSE		FALSE		FALSE		FALSE
SFXN3	FALSE		FALSE		FALSE		FALSE		FALSE
RGPD3	FALSE		FALSE		FALSE		FALSE		FALSE
RBM8A	FALSE		FALSE		FALSE		FALSE		FALSE
NUP58	FALSE		FALSE		FALSE		FALSE		FALSE
RPS13	FALSE		FALSE		FALSE		FALSE		FALSE
TCF25	FALSE		FALSE		FALSE		FALSE		FALSE
ISOC2	TRUE		FALSE		FALSE		FALSE		FALSE
ATP5F1C	FALSE		FALSE		FALSE		FALSE		FALSE
RAB2B	FALSE		FALSE		FALSE		FALSE		FALSE
MAOA	FALSE		FALSE		FALSE		FALSE		FALSE
DEGS1	FALSE		FALSE		FALSE		FALSE		FALSE
OS9	FALSE		FALSE		FALSE		FALSE		FALSE
INF2	FALSE		FALSE		FALSE		FALSE		FALSE
PSMD4	FALSE		FALSE		FALSE		FALSE		FALSE
FTSJ1	FALSE		FALSE		FALSE		FALSE		FALSE
KNOP1	FALSE		FALSE		FALSE		FALSE		FALSE
CSTF2	FALSE		FALSE		FALSE		FALSE		FALSE
SSR4	TRUE		FALSE		FALSE		FALSE		FALSE
DDX6	FALSE		FALSE		FALSE		FALSE		FALSE
MTDH	FALSE		FALSE		FALSE		FALSE		FALSE
CSNK1A1	FALSE		FALSE		FALSE		FALSE		FALSE
RPS20	FALSE		FALSE		FALSE		FALSE		FALSE
PFDN6	TRUE		FALSE		FALSE		FALSE		FALSE
RPL14	FALSE		FALSE		FALSE		FALSE		FALSE
SMC2	FALSE		FALSE		FALSE		FALSE		FALSE
RPL8	FALSE		FALSE		FALSE		FALSE		FALSE
CKAP2	FALSE		FALSE		FALSE		FALSE		FALSE
PLEKHA5	FALSE		FALSE		FALSE		FALSE		FALSE
RTN4	FALSE		FALSE		FALSE		FALSE		FALSE
EHD4	FALSE		FALSE		FALSE		FALSE		FALSE
DDX54	FALSE		FALSE		FALSE		FALSE		FALSE
BCAP31	TRUE		FALSE		FALSE		FALSE		FALSE
PRPF38A	FALSE		FALSE		FALSE		FALSE		FALSE
RPL10	FALSE		FALSE		FALSE		FALSE		FALSE
FXN	FALSE		FALSE		FALSE		FALSE		FALSE
DHX38	FALSE		FALSE		FALSE		FALSE		FALSE
RGPD4	FALSE		FALSE		FALSE		FALSE		FALSE
NENF	TRUE		FALSE		FALSE		FALSE		FALSE
CPOX	FALSE		FALSE		FALSE		FALSE		FALSE
LIN7C	FALSE		FALSE		FALSE		FALSE		FALSE
DCTN2	FALSE		FALSE		FALSE		FALSE		FALSE
ATP5F1A	FALSE		FALSE		FALSE		FALSE		FALSE
POLR2C	TRUE		FALSE		FALSE		FALSE		FALSE
PPP1CA	TRUE		FALSE		FALSE		FALSE		FALSE
THOC2	FALSE		FALSE		FALSE		FALSE		FALSE
LIN7A	FALSE		FALSE		FALSE		FALSE		FALSE
DDX21	FALSE		FALSE		FALSE		FALSE		FALSE
DYNC1I2	FALSE		FALSE		FALSE		FALSE		FALSE
VPS4A	FALSE		FALSE		FALSE		FALSE		FALSE
SMARCC2	FALSE		FALSE		FALSE		FALSE		FALSE
ERLIN1	FALSE		FALSE		FALSE		FALSE		FALSE
SYMPK	FALSE		FALSE		FALSE		FALSE		FALSE
CBX5	FALSE		FALSE		FALSE		FALSE		FALSE
PPP1CB	FALSE		FALSE		FALSE		FALSE		FALSE
C7orf50	FALSE		FALSE		FALSE		FALSE		FALSE
ERBB2	FALSE		FALSE		FALSE		FALSE		FALSE
NDC1	FALSE		FALSE		FALSE		FALSE		FALSE
TRIP12	FALSE		FALSE		FALSE		FALSE		FALSE
DCAF13	FALSE		FALSE		FALSE		FALSE		FALSE
ESF1	FALSE		FALSE		FALSE		FALSE		FALSE
RPS27	TRUE		FALSE		FALSE		FALSE		FALSE
AQR	FALSE		FALSE		FALSE		FALSE		FALSE
PTPN2	FALSE		FALSE		FALSE		FALSE		FALSE
CAPZA2	FALSE		FALSE		FALSE		FALSE		FALSE
GNL1	FALSE		FALSE		FALSE		FALSE		FALSE
ACSL1	FALSE		FALSE		FALSE		FALSE		FALSE
KIF20B	FALSE		FALSE		FALSE		FALSE		FALSE
HINT3	FALSE		FALSE		FALSE		FALSE		FALSE
CCDC47	FALSE		FALSE		FALSE		FALSE		FALSE
RPL23	FALSE		FALSE		FALSE		FALSE		FALSE
CIAPIN1	FALSE		FALSE		FALSE		FALSE		FALSE
RPS10P5	FALSE		FALSE		FALSE		FALSE		FALSE
PGAM4	FALSE		FALSE		FALSE		FALSE		FALSE
UTP15	FALSE		FALSE		FALSE		FALSE		FALSE
RPL6	FALSE		FALSE		FALSE		FALSE		FALSE
GCN1	FALSE		FALSE		FALSE		FALSE		FALSE
SUN1	FALSE		FALSE		FALSE		FALSE		FALSE
CCT8	FALSE		FALSE		FALSE		FALSE		FALSE
RGPD1	FALSE		FALSE		FALSE		FALSE		FALSE
RGPD2	FALSE		FALSE		FALSE		FALSE		FALSE
UBE2I	FALSE		FALSE		FALSE		FALSE		FALSE
TDRKH	FALSE		FALSE		FALSE		FALSE		FALSE
DNM3	FALSE		FALSE		FALSE		FALSE		FALSE
FH	FALSE		FALSE		FALSE		FALSE		FALSE
DDX56	FALSE		FALSE		FALSE		FALSE		FALSE
CCT7	TRUE		FALSE		FALSE		FALSE		FALSE
RPL36	TRUE		FALSE		FALSE		FALSE		FALSE
SMARCA1	FALSE		FALSE		FALSE		FALSE		FALSE
SYAP1	FALSE		FALSE		FALSE		FALSE		FALSE
EHMT2	FALSE		FALSE		FALSE		FALSE		FALSE
RBBP6	FALSE		FALSE		FALSE		FALSE		FALSE
RPL23A	FALSE		FALSE		FALSE		FALSE		FALSE
APOO	FALSE		FALSE		FALSE		FALSE		FALSE
GTF3C2	FALSE		FALSE		FALSE		FALSE		FALSE
SURF4	FALSE		FALSE		FALSE		FALSE		FALSE
RPS14	TRUE		FALSE		FALSE		FALSE		FALSE
GFAP	FALSE		FALSE		FALSE		FALSE		FALSE
RGPD5	FALSE		FALSE		FALSE		FALSE		FALSE
CUL2	FALSE		FALSE		FALSE		FALSE		FALSE
RGPD8	FALSE		FALSE		FALSE		FALSE		FALSE
RPL26	FALSE		FALSE		FALSE		FALSE		FALSE
RPL15	FALSE		FALSE		FALSE		FALSE		FALSE
RPL37	FALSE		FALSE		FALSE		FALSE		FALSE
ZW10	FALSE		FALSE		FALSE		FALSE		FALSE
NCLN	FALSE		FALSE		FALSE		FALSE		FALSE
BID	TRUE		FALSE		FALSE		FALSE		FALSE
BCAP29	FALSE		FALSE		FALSE		FALSE		FALSE
PKN2	FALSE		FALSE		FALSE		FALSE		FALSE
MED18	FALSE		FALSE		FALSE		FALSE		FALSE
RPL36A	FALSE		FALSE		FALSE		FALSE		FALSE
MAT2A	FALSE		FALSE		FALSE		FALSE		FALSE
RAB11FIP1	FALSE		FALSE		FALSE		FALSE		FALSE
HECTD1	FALSE		FALSE		FALSE		FALSE		FALSE
RPS15A	TRUE		FALSE		FALSE		FALSE		FALSE
ENPP4	FALSE		FALSE		FALSE		FALSE		FALSE
VDAC2	TRUE		FALSE		FALSE		FALSE		FALSE
TASOR2	FALSE		FALSE		FALSE		FALSE		FALSE
PSMA7	TRUE		FALSE		FALSE		FALSE		FALSE
NUP155	FALSE		FALSE		FALSE		FALSE		FALSE
PNPLA6	FALSE		FALSE		FALSE		FALSE		FALSE
USP7	FALSE		FALSE		FALSE		FALSE		FALSE
RPL26L1	TRUE		FALSE		FALSE		FALSE		FALSE
BMS1	FALSE		FALSE		FALSE		FALSE		FALSE
RRP7A	FALSE		FALSE		FALSE		FALSE		FALSE
SEC62	FALSE		FALSE		FALSE		FALSE		FALSE
HAUS2	FALSE		FALSE		FALSE		FALSE		FALSE
EXOC7	FALSE		FALSE		FALSE		FALSE		FALSE
PSMC1	FALSE		FALSE		FALSE		FALSE		FALSE
RPS25	FALSE		FALSE		FALSE		FALSE		FALSE
RPL18	TRUE		FALSE		FALSE		FALSE		FALSE
CPSF2	FALSE		FALSE		FALSE		FALSE		FALSE
GTF3C3	FALSE		FALSE		FALSE		FALSE		FALSE
TSPAN6	TRUE		FALSE		FALSE		FALSE		FALSE
PPIB	TRUE		FALSE		FALSE		FALSE		FALSE
AP3M1	FALSE		FALSE		FALSE		FALSE		FALSE
TMEM115	FALSE		FALSE		FALSE		FALSE		FALSE
RPL34	TRUE		FALSE		FALSE		FALSE		FALSE
NVL	FALSE		FALSE		FALSE		FALSE		FALSE
HK1	FALSE		FALSE		FALSE		FALSE		FALSE
DNAJC10	FALSE		FALSE		FALSE		FALSE		FALSE
RPS27L	FALSE		FALSE		FALSE		FALSE		FALSE
PUS1	FALSE		FALSE		FALSE		FALSE		FALSE
KIF2C	FALSE		FALSE		FALSE		FALSE		FALSE
SIRT2	TRUE		FALSE		FALSE		FALSE		FALSE
SNRPB2	FALSE		FALSE		FALSE		FALSE		FALSE
BAG2	FALSE		FALSE		FALSE		FALSE		FALSE
S100A11	TRUE		FALSE		FALSE		FALSE		FALSE
VTA1	FALSE		FALSE		FALSE		FALSE		FALSE
TOMM7	TRUE		FALSE		FALSE		FALSE		FALSE
RPL5	FALSE		FALSE		FALSE		FALSE		FALSE
ILK	TRUE		FALSE		FALSE		FALSE		FALSE
ATP2A3	FALSE		FALSE		FALSE		FALSE		FALSE
NSDHL	TRUE		FALSE		FALSE		FALSE		FALSE
WDR43	FALSE		FALSE		FALSE		FALSE		FALSE
HAUS7	FALSE		FALSE		FALSE		FALSE		FALSE
TSTD1	TRUE		FALSE		FALSE		FALSE		FALSE
PDCD11	FALSE		FALSE		FALSE		FALSE		FALSE
PCMT1	FALSE		FALSE		FALSE		FALSE		FALSE
ATP5PB	FALSE		FALSE		FALSE		FALSE		FALSE
RTRAF	FALSE		FALSE		FALSE		FALSE		FALSE
PSMC2	FALSE		FALSE		FALSE		FALSE		FALSE
HNRNPL	FALSE		FALSE		FALSE		FALSE		FALSE
EIF5B	FALSE		FALSE		FALSE		FALSE		FALSE
NRAS	FALSE		FALSE		FALSE		FALSE		FALSE
GLOD4	FALSE		FALSE		FALSE		FALSE		FALSE
RRP7BP	FALSE		FALSE		FALSE		FALSE		FALSE
EIF3H	FALSE		FALSE		FALSE		FALSE		FALSE
SORT1	FALSE		FALSE		FALSE		FALSE		FALSE
MGST3	TRUE		FALSE		FALSE		FALSE		FALSE
DNM1	FALSE		FALSE		FALSE		FALSE		FALSE
CHD2	FALSE		FALSE		FALSE		FALSE		FALSE
POLE	FALSE		FALSE		FALSE		FALSE		FALSE
CAPZB	FALSE		FALSE		FALSE		FALSE		FALSE
NEFH	FALSE		FALSE		FALSE		FALSE		FALSE
EIF2B4	FALSE		FALSE		FALSE		FALSE		FALSE
CBR1	TRUE		FALSE		FALSE		FALSE		FALSE
SF3A1	FALSE		FALSE		FALSE		FALSE		FALSE
NOP58	FALSE		FALSE		FALSE		FALSE		FALSE
TOMM40	FALSE		FALSE		FALSE		FALSE		FALSE
MTHFD1	FALSE		FALSE		FALSE		FALSE		FALSE
FARSA	TRUE		FALSE		FALSE		FALSE		FALSE
NIP7	FALSE		FALSE		FALSE		FALSE		FALSE
SEC22B	FALSE		FALSE		FALSE		FALSE		FALSE
SMAD3	FALSE		FALSE		FALSE		FALSE		FALSE
ABCC1	FALSE		FALSE		FALSE		FALSE		FALSE
CLTCL1	FALSE		FALSE		FALSE		FALSE		FALSE
SLC39A7	FALSE		FALSE		FALSE		FALSE		FALSE
LSM6	FALSE		FALSE		FALSE		FALSE		FALSE
EIF3G	FALSE		FALSE		FALSE		FALSE		FALSE
CAP1	FALSE		FALSE		FALSE		FALSE		FALSE
HMG20A	FALSE		FALSE		FALSE		FALSE		FALSE
SPTBN2	FALSE		FALSE		FALSE		FALSE		FALSE
MYDGF	FALSE		FALSE		FALSE		FALSE		FALSE
ECE1	FALSE		FALSE		FALSE		FALSE		FALSE
PCNT	FALSE		FALSE		FALSE		FALSE		FALSE
OXCT1	FALSE		FALSE		FALSE		FALSE		FALSE
ATXN2L	FALSE		FALSE		FALSE		FALSE		FALSE
AP1G1	FALSE		FALSE		FALSE		FALSE		FALSE
MED6	FALSE		FALSE		FALSE		FALSE		FALSE
ERCC3	FALSE		FALSE		FALSE		FALSE		FALSE
RPL29	TRUE		FALSE		FALSE		FALSE		FALSE
ATP6AP1	TRUE		FALSE		FALSE		FALSE		FALSE
MAP4K4	FALSE		FALSE		FALSE		FALSE		FALSE
CDC73	FALSE		FALSE		FALSE		FALSE		FALSE
OCIAD1	FALSE		FALSE		FALSE		FALSE		FALSE
TFAM	FALSE		FALSE		FALSE		FALSE		FALSE
DDX19A	FALSE		FALSE		FALSE		FALSE		FALSE
TRAFD1	FALSE		FALSE		FALSE		FALSE		FALSE
FMR1	FALSE		FALSE		FALSE		FALSE		FALSE
SUPT6H	TRUE		FALSE		FALSE		FALSE		FALSE
RPS18	FALSE		FALSE		FALSE		FALSE		FALSE
PCM1	FALSE		FALSE		FALSE		FALSE		FALSE
ATAD2	FALSE		FALSE		FALSE		FALSE		FALSE
TOM1	TRUE		FALSE		FALSE		FALSE		FALSE
RNF5	TRUE		FALSE		FALSE		FALSE		FALSE
CPSF1	FALSE		FALSE		FALSE		FALSE		FALSE
CLUH	FALSE		FALSE		FALSE		FALSE		FALSE
TERF2IP	FALSE		FALSE		FALSE		FALSE		FALSE
ZMYM2	FALSE		FALSE		FALSE		FALSE		FALSE
NFXL1	FALSE		FALSE		FALSE		FALSE		FALSE
PSMC5	FALSE		FALSE		FALSE		FALSE		FALSE
RRAS2	FALSE		FALSE		FALSE		FALSE		FALSE
SART1	FALSE		FALSE		FALSE		FALSE		FALSE
RPS10	FALSE		FALSE		FALSE		FALSE		FALSE
RAD50	FALSE		FALSE		FALSE		FALSE		FALSE
ARL1	FALSE		FALSE		FALSE		FALSE		FALSE
CDC42BPB	FALSE		FALSE		FALSE		FALSE		FALSE
PDK3	FALSE		FALSE		FALSE		FALSE		FALSE
CDKN2A	TRUE		FALSE		FALSE		FALSE		FALSE
BRD3	FALSE		FALSE		FALSE		FALSE		FALSE
TTF1	FALSE		FALSE		FALSE		FALSE		FALSE
RPLP0P6	FALSE		FALSE		FALSE		FALSE		FALSE
DMAP1	FALSE		FALSE		FALSE		FALSE		FALSE
PCYOX1	FALSE		FALSE		FALSE		FALSE		FALSE
SRCAP	FALSE		FALSE		FALSE		FALSE		FALSE
MARK2	FALSE		FALSE		FALSE		FALSE		FALSE
SRPK1	FALSE		FALSE		FALSE		FALSE		FALSE
ATIC	FALSE		FALSE		FALSE		FALSE		FALSE
SDF2L1	TRUE		FALSE		FALSE		FALSE		FALSE
RPL37A	TRUE		FALSE		FALSE		FALSE		FALSE
CWC27	FALSE		FALSE		FALSE		FALSE		FALSE
STX10	FALSE		FALSE		FALSE		FALSE		FALSE
SLC25A3	TRUE		FALSE		FALSE		FALSE		FALSE
CADM4	FALSE		FALSE		FALSE		FALSE		FALSE
RPS12	FALSE		FALSE		FALSE		FALSE		FALSE
SNRPG	FALSE		FALSE		FALSE		FALSE		FALSE
SNRPGP15	FALSE		FALSE		FALSE		FALSE		FALSE
ATG9A	FALSE		FALSE		FALSE		FALSE		FALSE
ANXA11	FALSE		FALSE		FALSE		FALSE		FALSE
COLGALT1	FALSE		FALSE		FALSE		FALSE		FALSE
PSMA3	FALSE		FALSE		FALSE		FALSE		FALSE
ZC3HAV1	FALSE		FALSE		FALSE		FALSE		FALSE
RPS28	TRUE		FALSE		FALSE		FALSE		FALSE
CSNK2A2	FALSE		FALSE		FALSE		FALSE		FALSE
[truncated: 2,699 more rows]
