# Supplementary material
Source: HighWire-hosted journal article supplement (doi:10.1101/rna.079799.123)
Supplement: Supplemental_Table_S1.xlsx [file Supplemental_Table_S1.xlsx]

## Sheet: Oligonucleotides
Oligo ID	Sequence (5' -> 3')	Related Figures	Assay
LARP4 sgRNA-A (FWD)	CACCGTTGTTCAGTACACTTCGCCA	Figure 2	LARP4 CRISPR KO
LARP4 sgRNA-A (REV)	aaacTGGCGAAGTGTACTGAACAAC	Figure 2	LARP4 CRISPR KO
LARP4 sgRNA-B (FWD)	CACCGCGACATGTTGCTTTTCGTGG	Figure 2	LARP4 CRISPR KO
LARP4 sgRNA-B (REV)	aaacCCACGAAAAGCAACATGTCGC	Figure 2	LARP4 CRISPR KO
LARP4 KO screen (FWD)	ACTTTTCGGCAGGGTTGGTTTG	Figure 2	LARP4 CRISPR KO
LARP4 KO screen (REV)	CCAGAACAGCCCTCCGTTTTTC	Figure 2	LARP4 CRISPR KO
NUP85 (ref) (FWD)	AGTGACTCGGCTCTTGTACTC	Figure 2F and 2G	Gene expression qPCR
NUP85 (ref) (REV)	GCGATGCTGCACTCTTTGAT	Figure 2F and 2G	Gene expression qPCR
ACTB (FWD)	CTCTTCCAGCCTTCCTTCCT	Figure 2F and 2G	Gene expression qPCR
ACTB (REV)	AGCACTGTGTTGGCGTACAG	Figure 2F and 2G	Gene expression qPCR
MRPL23 (FWD)	GACAAGGGTGGACCTCAGGAAT	Figure 2F and 2G	Gene expression qPCR
MRPL23 (REV)	CGGCTTCTTGATCCTCACGTTTC	Figure 2F and 2G	Gene expression qPCR
MRPS5 (FWD)	GAAGAGTGTTCTCGGCAATGGC	Figure 2F and 2G	Gene expression qPCR
MRPS5 (REV)	TACTGCTGGCTCATCAGGTGAC	Figure 2F and 2G	Gene expression qPCR
MRPL24 (FWD)	CCATTACCGCTATGGGATGAGC	Figure 2F and 2G	Gene expression qPCR
MRPL24 (REV)	CCACAGAACAGATACCAGTCTTC	Figure 2F and 2G	Gene expression qPCR
MRPL14 (FWD)	ACTGGGAGTCTGAGTGCGATT	Figure 2F and 2G	Gene expression qPCR
MRPL14 (REV)	AGGAGCCCGATGGTATGGG	Figure 2F and 2G	Gene expression qPCR
MRPL51 (FWD)	TCTCTTGGTGTGCCTAGATTGA	Figure 2F and 2G	Gene expression qPCR
MRPL51 (REV)	CACTCCGAACATGGCCCTTTT	Figure 2F and 2G	Gene expression qPCR
MRPL18 (FWD)	GCAGCGAAACCTGAAGTGGA	Figure 2F and 2G	Gene expression qPCR
MRPL18 (REV)	GTGCCAGAACTCACGGGAG	Figure 2F and 2G	Gene expression qPCR
MRPS11 (FWD)	GGGATTTCGGAATGCCAAGAA	Figure 2F and 2G	Gene expression qPCR
MRPS11 (REV)	GGATCACGCCCTTTTGTTTAGC	Figure 2F and 2G	Gene expression qPCR
MRPS34 (FWD)	CTCCGGGCCATGATTATCGC	Figure 2F and 2G	Gene expression qPCR
MRPS34 (REV)	CCATGCGTATCCTCTGCACAT	Figure 2F and 2G	Gene expression qPCR
MRPS6 (FWD)	GGCCAGAGACTGCTGCTAC	Figure 2F and 2G	Gene expression qPCR
MRPS6 (REV)	GCGGTGGGTGCATAAAAATCC	Figure 2F and 2G	Gene expression qPCR
NDUFB7 (FWD)	TGCGCATGAAGGAGTTTGAG	Figure 2F and 2G	Gene expression qPCR
NDUFB7 (REV)	CAGATTTGCCGCCTTCTTCTC	Figure 2F and 2G	Gene expression qPCR
NDUFS1 (FWD)	TCGGATGACTAGTGGTGTTA	Figure 2F and 2G	Gene expression qPCR
NDUFS1 (REV)	TTATAGCCAAGGTCCAAAGC	Figure 2F and 2G	Gene expression qPCR
NDUFS6 (FWD)	TTCGGTTTGTAGGTCGTCAGA	Figure 2F and 2G	Gene expression qPCR
NDUFS6 (REV)	CCATCGCACGCTATCACCC	Figure 2F and 2G	Gene expression qPCR
NDUFB11 (FWD)	CGTCCGCTGGGAATCTAGC	Figure 2F and 2G	Gene expression qPCR
NDUFB11 (REV)	ACGGGGTCCTTGTCATAACCA	Figure 2F and 2G	Gene expression qPCR
NDUFA8 (FWD)	CCCAACAAGGAGTTTATGCTCT	Figure 2F and 2G	Gene expression qPCR
NDUFA8 (REV)	CACAGTGACGTTTTATCTGCCT	Figure 2F and 2G	Gene expression qPCR
NDUFB9 (FWD)	GTGGTGCGTCCAGAGAGAC	Figure 2F and 2G	Gene expression qPCR
NDUFB9 (REV)	GGCCTTCGCCATATCCTTTTC	Figure 2F and 2G	Gene expression qPCR
UQCRQ (FWD)	ATCCGCACGTCTTCACTAAAG	Figure 2F and 2G	Gene expression qPCR
UQCRQ (REV)	TGGATCTCTCGAACTCTTCAGTC	Figure 2F and 2G	Gene expression qPCR
COX5B (FWD)	CATCTGGAGGTGGTGTTC	Figure 2F and 2G	Gene expression qPCR
COX5B (REV)	CTTGTAATGGGCTCCACA	Figure 2F and 2G	Gene expression qPCR
COX7A2 (FWD)	CTCGGAGGTAGTTCCGGTTC	Figure 2F and 2G	Gene expression qPCR
COX7A2 (REV)	TCTGCCCAATCTGACGAAGAG	Figure 2F and 2G	Gene expression qPCR
COX15 (FWD)	AGTCTGGCCTCTCGATGGTAG	Figure 2F and 2G	Gene expression qPCR
COX15 (REV)	ACCCCACATTCGGTGTGAGTA	Figure 2F and 2G	Gene expression qPCR
COX6B1 (FWD)	CTACAAGACCGCCCCTTTTGA	Figure 2F and 2G	Gene expression qPCR
COX6B1 (REV)	GCAGAGGGACTGGTACACAC	Figure 2F and 2G	Gene expression qPCR
ATP5G1 (FWD)	TTCCAGACCAGTGTTGTCTCC	Figure 2F and 2G	Gene expression qPCR
ATP5G1 (REV)	GACGGGTTCCTGGCATAGC	Figure 2F and 2G	Gene expression qPCR
ATP5L (FWD)	ATGGCCCAATTTGTCCGTAAC	Figure 2F and 2G	Gene expression qPCR
ATP5L (REV)	TGGCGTAGTACCAAAATGTGG	Figure 2F and 2G	Gene expression qPCR
MT-ND1 (FWD)	TCCTACTCCTCATTGTACCCA	Figure S2A and 2B	Gene expression qPCR
MT-ND1 (REV)	TTTCGTTCGGTAAGCATTAGG	Figure S2A and 2B	Gene expression qPCR
MT-CYB (FWD)	CAATCACTTTATTGACTCCTAGCC	Figure S2A and 2B	Gene expression qPCR
MT-CYB (REV)	GTTGTCCTCCGATTCAGGT	Figure S2A and 2B	Gene expression qPCR
MT-CO1 (FWD)	GACGTAGACACACGAGCATATTTCA	Figure S2A and 2B	Gene expression qPCR
MT-CO1 (REV)	AGGACATAGTGGAAGTGAGCTACAAC	Figure S2A and 2B	Gene expression qPCR
MT-CO2 (FWD)	ACGCATCCTTTACATAACAGAC	Figure S2A and 2B	Gene expression qPCR
MT-CO2 (REV)	GCCAATTGATTTGATGGTAAGG	Figure S2A and 2B	Gene expression qPCR
MT-ATP6 (FWD)	TAGCCATACACAACACTAAAGGACGA	Figure S2A and 2B	Gene expression qPCR
MT-ATP6 (REV)	GGGCATTTTTAATCTTAGAGCGAAA	Figure S2A and 2B	Gene expression qPCR
MT-RNR1 (FWD)	TAGAGGAGCCTGTTCTGTAATCGAT	Figure S2A and 2B	Gene expression qPCR
MT-RNR1 (REV)	CGACCCTTAAGTTTCATAAGGGCTA	Figure S2A and 2B	Gene expression qPCR
TFAM (FWD)	ATGGCGTTTCTCCGAAGCAT	Figure S2A and 2B	Gene expression qPCR
TFAM (REV)	TCCGCCCTATAAGCATCTTGA	Figure S2A and 2B	Gene expression qPCR
NRF1 (FWD)	GTCCTCTGTATCTCACCCTC	Figure S2A and 2B	Gene expression qPCR
NRF1 (REV)	CTTACGCACCACATTCTCC	Figure S2A and 2B	Gene expression qPCR
NRF1 (FWD)	TCCTCTGTATCTCACCCTC	Figure S2A and 2B	Gene expression qPCR
NRF1 (REV)	ACTTACGCACCACATTCTC	Figure S2A and 2B	Gene expression qPCR
TFB2M (FWD)	ACCACCTGCTATGTCTTCTC	Figure S2A and 2B	Gene expression qPCR
TFB2M (REV)	TTTAAAGGGATGTCTGCTGTC	Figure S2A and 2B	Gene expression qPCR
TFB2M (FWD)	CACTTACGTTCATTGACTCCA	Figure S2A and 2B	Gene expression qPCR
TFB2M (REV)	GTTAACTACTTTCTCATCCTCCTG	Figure S2A and 2B	Gene expression qPCR
NRF2 (FWD)	GTGCCCTCTGCATGAGATTG	Figure S2A and 2B	Gene expression qPCR
NRF2 (REV)	CGCTCAAGGCATTTTAGGCAAA	Figure S2A and 2B	Gene expression qPCR
SOD2 (FWD)	TGGTTTCAATAAGGAACGGG	Figure S2A and 2B	Gene expression qPCR
SOD2 (REV)	GAATAAGGCCTGTTGTTCCT	Figure S2A and 2B	Gene expression qPCR
MITO-tRNA (FWD)	CACCCAAGAACAGGGTTTGT	Figure 5F	Nuclear/Mitochondrial DNA qPCR
MITO-tRNA (REV)	TGGCCATGGGTATGTTGTTA	Figure 5F	Nuclear/Mitochondrial DNA qPCR
B2M (FWD)	TGCTGTCTCCATGTTTGATGTATCT	Figure 5F	Nuclear/Mitochondrial DNA qPCR
B2M (REV)	TCTCTGCTCCCCACCTCTAAGT	Figure 5F	Nuclear/Mitochondrial DNA qPCR
