# Supplementary material
Source: HighWire-hosted journal article supplement (doi:10.1101/rna.079799.123)
Supplement: Supplemental_Table_S4.xlsx [file Supplemental_Table_S4.xlsx]

## Sheet: A.LARP4_eCLIP_HEK293_by_peaks
ENSG	Symbol	pValue-log10	l2fc_avg(peak)	-log(pvalue)>7 and l2fc(IP/input)>4	MitoCarta
ENSG00000111775	COX6A1	400	7.20669	TRUE	TRUE
ENSG00000174917	C19orf70	28.2252	6.85273	TRUE	TRUE
ENSG00000112695	COX7A2	56.609	6.83271	TRUE	TRUE
ENSG00000189043	NDUFA4	42.136	6.80838	TRUE	TRUE
ENSG00000183011	LSMD1	84.9681	6.63187	TRUE	FALSE
lncRNA|lnc-NMRK2-5	lnc-NMRK2-5	25.7177	6.58876	TRUE	FALSE
ENSG00000188026	RILPL1	29.1632	6.53641	TRUE	FALSE
ENSG00000099977	DDT	22.8665	6.53083	TRUE	FALSE
ENSG00000233927	RPS28	38.6998	6.44834	TRUE	FALSE
ENSG00000164919	COX6C	59.7665	6.41923	TRUE	TRUE
ENSG00000152082	MZT2B	71.9785	6.38479	TRUE	FALSE
ENSG00000180992	MRPL14	40.0911	6.37733	TRUE	TRUE
ENSG00000100300	TSPO	58.4547	6.37195	TRUE	TRUE
ENSG00000196976	LAGE3	37.5382	6.36075	TRUE	FALSE
ENSG00000214026	MRPL23	43.0669	6.3598	TRUE	TRUE
ENSG00000174886	NDUFA11	52.5386	6.35408	TRUE	TRUE
ENSG00000176340	COX8A	400	6.33517	TRUE	TRUE
ENSG00000131495	NDUFA2	52.3867	6.29725	TRUE	TRUE
ENSG00000100284	TOM1	58.2083	6.2956	TRUE	FALSE
ENSG00000167283	ATP5L	28.2252	6.25307	TRUE	TRUE
ENSG00000145912	NHP2	33.4632	6.2424	TRUE	FALSE
ENSG00000126267	COX6B1	68.2948	6.21614	TRUE	TRUE
ENSG00000159199	ATP5G1	400	6.21191	TRUE	TRUE
ENSG00000127838	PNKD	51.987	6.19346	TRUE	FALSE
ENSG00000141552	ANAPC11	400	6.18061	TRUE	FALSE
ENSG00000135940	COX5B	400	6.16389	TRUE	TRUE
ENSG00000215845	TSTD1	16.0379	6.12155	TRUE	TRUE
ENSG00000233276	GPX1	68.5297	6.1091	TRUE	TRUE
ENSG00000074842	C19orf10	37.3075	6.10578	TRUE	FALSE
ENSG00000233608	TWIST2	13.0017	5.97462	TRUE	FALSE
ENSG00000147123	NDUFB11	32.9388	5.97268	TRUE	TRUE
ENSG00000182154	MRPL41	63.0517	5.92843	TRUE	TRUE
ENSG00000112514	CUTA	400	5.91952	TRUE	FALSE
ENSG00000147684	NDUFB9	86.5542	5.88185	TRUE	TRUE
ENSG00000160191	PDE9A	16.0379	5.88062	TRUE	FALSE
ENSG00000167552	TUBA1A	27.5991	5.87699	TRUE	FALSE
ENSG00000125356	NDUFA1	42.373	5.87372	TRUE	TRUE
ENSG00000213741	RPS29	75.1999	5.86469	TRUE	FALSE
ENSG00000127540	UQCR11	400	5.83671	TRUE	TRUE
ENSG00000219438	FAM19A5	16.9706	5.82615	TRUE	FALSE
ENSG00000145494	NDUFS6	400	5.82452	TRUE	TRUE
ENSG00000054148	PHPT1	400	5.81038	TRUE	FALSE
ENSG00000146701	MDH2	38.8948	5.78463	TRUE	TRUE
ENSG00000229833	PET100	24.4646	5.76192	TRUE	TRUE
ENSG00000030582	GRN	56.1955	5.75439	TRUE	FALSE
ENSG00000147257	GPC3	21.6488	5.75406	TRUE	FALSE
ENSG00000156411	C14orf2	39.4579	5.73441	TRUE	TRUE
ENSG00000142507	PSMB6	52.857	5.72335	TRUE	FALSE
ENSG00000166595	FAM96B	43.9211	5.708	TRUE	FALSE
ENSG00000146066	HIGD2A	38.7658	5.69493	TRUE	TRUE
ENSG00000155368	DBI	42.4251	5.68493	TRUE	TRUE
ENSG00000140990	NDUFB10	52.1005	5.66643	TRUE	TRUE
ENSG00000163046	ANKRD30BL	35.3058	5.6571	TRUE	FALSE
ENSG00000127184	COX7C	54.5501	5.65189	TRUE	TRUE
ENSG00000154518	ATP5G3	43.8372	5.64248	TRUE	TRUE
ENSG00000125995	ROMO1	58.5811	5.6349	TRUE	TRUE
ENSG00000178952	TUFM	55.7391	5.62942	TRUE	TRUE
ENSG00000129559	NEDD8	21.7403	5.62597	TRUE	FALSE
ENSG00000125743	SNRPD2	400	5.61124	TRUE	FALSE
ENSG00000251357	AP000350.10	400	5.60906	TRUE	FALSE
ENSG00000247596	TWF2	12.2236	5.59936	TRUE	FALSE
ENSG00000105583	WDR83OS	66.0275	5.59391	TRUE	FALSE
ENSG00000143198	MGST3	50.9018	5.586	TRUE	TRUE
ENSG00000205155	PSENEN	19.8439	5.57559	TRUE	FALSE
ENSG00000168653	NDUFS5	53.1744	5.57494	TRUE	TRUE
ENSG00000054611	TBC1D22A	12.517	5.56866	TRUE	FALSE
ENSG00000240972	MIF	400	5.55631	TRUE	FALSE
ENSG00000227097	RP11-742N3.1	51.7644	5.55003	TRUE	FALSE
MI0017342	hsa-mir-4709	20.0053	5.54312	TRUE	FALSE
ENSG00000173950	XXYLT1	29.2562	5.54252	TRUE	FALSE
ENSG00000105135	ILVBL	23.0496	5.51583	TRUE	FALSE
ENSG00000106400	ZNHIT1	28.6444	5.50937	TRUE	FALSE
ENSG00000171858	RPS21	400	5.50595	TRUE	FALSE
ENSG00000128524	ATP6V1F	33.3397	5.50041	TRUE	FALSE
ENSG00000142684	ZNF593	16.3749	5.49767	TRUE	FALSE
ENSG00000173638	SLC19A1	15.7494	5.48994	TRUE	FALSE
ENSG00000084207	GSTP1	85.5478	5.48981	TRUE	FALSE
ENSG00000105229	PIAS4	33.2402	5.48932	TRUE	FALSE
ENSG00000135441	BLOC1S1	30.9157	5.48647	TRUE	TRUE
ENSG00000125656	CLPP	14.8412	5.47383	TRUE	TRUE
ENSG00000243678	NME2	400	5.46565	TRUE	FALSE
ENSG00000092841	MYL6	30.7883	5.46079	TRUE	FALSE
ENSG00000172336	POP7	15.1652	5.44027	TRUE	FALSE
ENSG00000172354	GNB2	25.6556	5.43889	TRUE	FALSE
ENSG00000211450	C11orf31	46.7884	5.42614	TRUE	FALSE
ENSG00000267855	NDUFA7	32.0407	5.41463	TRUE	TRUE
ENSG00000184990	SIVA1	71.2252	5.40743	TRUE	FALSE
ENSG00000106153	CHCHD2	400	5.40717	TRUE	TRUE
ENSG00000166228	PCBD1	13.9867	5.39716	TRUE	FALSE
ENSG00000198258	UBL5	33.1993	5.39162	TRUE	FALSE
ENSG00000111775	AL021546.6	400	5.38272	TRUE	TRUE
ENSG00000183617	MRPL54	30.0471	5.36172	TRUE	TRUE
ENSG00000124562	SNRPC	22.7813	5.35531	TRUE	FALSE
ENSG00000156482	RPL30	30.4808	5.33204	TRUE	FALSE
ENSG00000166508	MCM7	47.8712	5.31571	TRUE	FALSE
ENSG00000008018	PSMB1	34.8941	5.31428	TRUE	FALSE
ENSG00000015475	BID	15.3198	5.30778	TRUE	TRUE
ENSG00000166681	NGFRAP1	70.7249	5.30077	TRUE	FALSE
ENSG00000129562	DAD1	13.0017	5.29983	TRUE	FALSE
ENSG00000162244	RPL29	76.3062	5.28806	TRUE	FALSE
ENSG00000155366	RHOC	15.2721	5.28655	TRUE	FALSE
ENSG00000186010	NDUFA13	81.4744	5.28223	TRUE	TRUE
ENSG00000118640	VAMP8	36.5434	5.27697	TRUE	FALSE
ENSG00000007080	CCDC124	26.5156	5.27198	TRUE	FALSE
ENSG00000256100	AP000721.4	63.7122	5.26978	TRUE	TRUE
ENSG00000119421	NDUFA8	15.524	5.26847	TRUE	TRUE
ENSG00000185608	MRPL40	27.7756	5.26829	TRUE	TRUE
ENSG00000158321	AUTS2	65.5779	5.26103	TRUE	FALSE
ENSG00000119013	NDUFB3	15.4465	5.25469	TRUE	TRUE
ENSG00000170315	UBB	400	5.25461	TRUE	FALSE
ENSG00000176155	CCDC57	13.6334	5.25428	TRUE	FALSE
ENSG00000181991	MRPS11	26.7325	5.25361	TRUE	TRUE
ENSG00000164587	RPS14	52.5796	5.23959	TRUE	TRUE
ENSG00000170412	GPRC5C	9.30116	5.23032	TRUE	FALSE
ENSG00000152234	ATP5A1	12.517	5.22641	TRUE	TRUE
ENSG00000111639	MRPL51	24.7706	5.22332	TRUE	TRUE
ENSG00000124299	PEPD	14.7962	5.21909	TRUE	FALSE
ENSG00000111678	C12orf57	73.5278	5.21892	TRUE	FALSE
ENSG00000105193	RPS16	400	5.21841	TRUE	FALSE
ENSG00000131174	COX7B	24.4307	5.20698	TRUE	TRUE
ENSG00000002330	BAD	12.2718	5.20452	TRUE	TRUE
ENSG00000169692	AGPAT2	16.0379	5.20288	TRUE	FALSE
ENSG00000042753	AP2S1	400	5.20241	TRUE	FALSE
ENSG00000178741	COX5A	19.1168	5.19959	TRUE	TRUE
ENSG00000099800	TIMM13	47.6528	5.19656	TRUE	TRUE
ENSG00000171222	SCAND1	57.6148	5.19546	TRUE	FALSE
ENSG00000179085	DPM3	39.176	5.18866	TRUE	FALSE
ENSG00000175701	LINC00116	20.5968	5.18846	TRUE	FALSE
ENSG00000100216	TOMM22	8.71988	5.18787	TRUE	TRUE
ENSG00000167642	SPINT2	10.337	5.18728	TRUE	FALSE
ENSG00000131143	COX4I1	400	5.18538	TRUE	TRUE
ENSG00000072506	HSD17B10	20.7456	5.18417	TRUE	TRUE
ENSG00000101439	CST3	57.489	5.18079	TRUE	FALSE
ENSG00000062582	MRPS24	30.6587	5.1702	TRUE	TRUE
ENSG00000134825	TMEM258	15.5326	5.16628	TRUE	FALSE
ENSG00000106638	TBL2	8.5074	5.16201	TRUE	FALSE
ENSG00000108518	PFN1	400	5.15126	TRUE	FALSE
ENSG00000177556	ATOX1	14.4475	5.14779	TRUE	FALSE
ENSG00000160050	CCDC28B	9.10727	5.14779	TRUE	FALSE
ENSG00000204392	LSM2	11.1311	5.14309	TRUE	FALSE
ENSG00000118162	KPTN	8.5074	5.14277	TRUE	FALSE
ENSG00000175602	CCDC85B	8.13994	5.14277	TRUE	FALSE
ENSG00000149273	RPS3	400	5.14048	TRUE	FALSE
ENSG00000166165	CKB	400	5.13334	TRUE	FALSE
ENSG00000105427	CNFN	12.7303	5.13072	TRUE	FALSE
ENSG00000137880	GCHFR	15.9743	5.12919	TRUE	FALSE
ENSG00000178449	COX14	15.1588	5.12446	TRUE	TRUE
lncRNA|lnc-GALNT17-4	lnc-GALNT17-4	40.3809	5.12179	TRUE	FALSE
ENSG00000074071	MRPS34	19.5825	5.11877	TRUE	TRUE
ENSG00000116521	SCAMP3	23.6614	5.11423	TRUE	FALSE
ENSG00000164081	TEX264	20.9194	5.11054	TRUE	FALSE
ENSG00000124733	MEA1	12.4878	5.10468	TRUE	FALSE
ENSG00000166333	ILK	9.99631	5.10369	TRUE	FALSE
ENSG00000177700	POLR2L	51.3145	5.10302	TRUE	FALSE
ENSG00000168002	POLR2G	34.8527	5.10019	TRUE	FALSE
ENSG00000135404	CD63	82.5236	5.09931	TRUE	FALSE
ENSG00000115756	HPCAL1	7.90797	5.09467	TRUE	FALSE
ENSG00000167468	GPX4	400	5.088	TRUE	TRUE
ENSG00000171159	C9orf16	18.3295	5.08701	TRUE	FALSE
ENSG00000173915	USMG5	35.5033	5.08335	TRUE	TRUE
ENSG00000184983	NDUFA6	11.2316	5.08144	TRUE	TRUE
ENSG00000005022	SLC25A5	42.3484	5.07904	TRUE	TRUE
ENSG00000130770	ATPIF1	37.4828	5.0751	TRUE	TRUE
ENSG00000145247	OCIAD2	14.1116	5.07375	TRUE	TRUE
ENSG00000071553	ATP6AP1	36.8068	5.07257	TRUE	FALSE
ENSG00000159720	ATP6V0D1	29.3417	5.07065	TRUE	FALSE
ENSG00000171813	PWWP2B	6.7116	5.06165	FALSE	FALSE
ENSG00000105671	DDX49	8.20761	5.05813	TRUE	FALSE
ENSG00000198356	ASNA1	37.9158	5.04192	TRUE	FALSE
ENSG00000130332	LSM7	71.1386	5.03911	TRUE	FALSE
ENSG00000204525	HLA-C	46.426	5.01767	TRUE	FALSE
ENSG00000126768	TIMM17B	30.7883	5.01674	TRUE	TRUE
ENSG00000129235	TXNDC17	13.5983	5.01439	TRUE	FALSE
ENSG00000165916	PSMC3	9.14978	5.00684	TRUE	FALSE
ENSG00000127445	PIN1	64.8607	5.00525	TRUE	FALSE
ENSG00000100387	RBX1	24.3083	5.00395	TRUE	FALSE
ENSG00000130520	LSM4	27.1166	4.99324	TRUE	FALSE
ENSG00000125835	SNRPB	400	4.98555	TRUE	FALSE
lncRNA|lnc-HMOX1-2	lnc-HMOX1-2	34.5184	4.98369	TRUE	FALSE
ENSG00000219200	RNASEK	400	4.9822	TRUE	FALSE
MI0003624	hsa-mir-611	17.8745	4.97581	TRUE	FALSE
ENSG00000123179	EBPL	7.01028	4.97581	TRUE	FALSE
ENSG00000182899	RPL35A	400	4.97548	TRUE	TRUE
ENSG00000205544	TMEM256	28.0171	4.97303	TRUE	FALSE
ENSG00000154277	UCHL1	75.8692	4.96926	TRUE	FALSE
ENSG00000141543	EIF4A3	10.95	4.96832	TRUE	FALSE
ENSG00000213221	DNLZ	10.6073	4.96221	TRUE	TRUE
ENSG00000161960	EIF4A1	29.4621	4.96221	TRUE	FALSE
ENSG00000182551	ADI1	10.4672	4.9549	TRUE	FALSE
ENSG00000118508	RAB32	5.81792	4.95163	FALSE	TRUE
ENSG00000168090	COPS6	23.7436	4.94968	TRUE	FALSE
ENSG00000169567	HINT1	43.5073	4.9486	TRUE	TRUE
ENSG00000198931	APRT	25.8556	4.94614	TRUE	FALSE
ENSG00000116288	PARK7	29.5853	4.94235	TRUE	TRUE
ENSG00000167792	NDUFV1	13.7046	4.93839	TRUE	TRUE
ENSG00000198832	SELM	14.2368	4.93609	TRUE	FALSE
ENSG00000204272	RP11-622K12.1	9.43149	4.93337	TRUE	FALSE
ENSG00000076826	CAMSAP3	5.81792	4.93337	FALSE	FALSE
ENSG00000173436	MINOS1	18.1786	4.93337	TRUE	TRUE
ENSG00000177674	AGTRAP	8.04517	4.93337	TRUE	FALSE
ENSG00000256269	HMBS	8.61566	4.93295	TRUE	TRUE
ENSG00000130313	PGLS	37.412	4.93084	TRUE	FALSE
ENSG00000183087	GAS6	6.7116	4.92661	FALSE	FALSE
ENSG00000105699	LSR	17.7487	4.92661	TRUE	FALSE
ENSG00000172531	PPP1CA	65.4953	4.91681	TRUE	FALSE
ENSG00000124702	KLHDC3	10.4848	4.91463	TRUE	FALSE
ENSG00000182004	SNRPE	14.9773	4.91448	TRUE	FALSE
ENSG00000187193	MT1X	19.4722	4.90835	TRUE	FALSE
ENSG00000117410	ATP6V0B	400	4.90753	TRUE	FALSE
ENSG00000105223	PLD3	15.6219	4.90411	TRUE	FALSE
ENSG00000172428	MYEOV2	11.7515	4.89716	TRUE	FALSE
ENSG00000197381	ADARB1	5.81792	4.89539	FALSE	FALSE
ENSG00000175166	PSMD2	27.129	4.89184	TRUE	FALSE
ENSG00000101608	MYL12A	19.5759	4.88495	TRUE	FALSE
ENSG00000101182	PSMA7	30.2598	4.88107	TRUE	FALSE
ENSG00000125611	CHCHD5	17.6365	4.87684	TRUE	TRUE
ENSG00000097021	ACOT7	27.7859	4.87322	TRUE	TRUE
ENSG00000112667	DNPH1	38.8234	4.86953	TRUE	FALSE
ENSG00000134248	LAMTOR5	12.0431	4.8683	TRUE	FALSE
ENSG00000258366	RTEL1	6.98477	4.86738	FALSE	FALSE
ENSG00000011485	PPP5C	21.8109	4.86569	TRUE	FALSE
ENSG00000115457	IGFBP2	37.6716	4.86409	TRUE	FALSE
ENSG00000184047	DIABLO	12.844	4.86253	TRUE	TRUE
ENSG00000165637	VDAC2	12.4042	4.86214	TRUE	TRUE
ENSG00000115286	NDUFS7	60.2517	4.86124	TRUE	TRUE
ENSG00000135624	CCT7	75.1754	4.86023	TRUE	TRUE
ENSG00000185201	IFITM2	6.7116	4.85998	FALSE	FALSE
ENSG00000188186	LAMTOR4	29.1957	4.85385	TRUE	FALSE
ENSG00000111640	GAPDH	87.0698	4.84927	TRUE	TRUE
ENSG00000099624	ATP5D	41.4977	4.84708	TRUE	TRUE
ENSG00000108679	LGALS3BP	32.1689	4.84655	TRUE	FALSE
ENSG00000169592	INO80E	11.828	4.84207	TRUE	FALSE
ENSG00000165238	WNK2	8.29321	4.84207	TRUE	FALSE
ENSG00000089248	ERP29	17.5028	4.8414	TRUE	FALSE
ENSG00000146425	DYNLT1	29.3232	4.83848	TRUE	FALSE
ENSG00000164062	APEH	23.8298	4.838	TRUE	FALSE
ENSG00000147383	NSDHL	13.8001	4.83792	TRUE	FALSE
ENSG00000160948	VPS28	11.1696	4.8376	TRUE	FALSE
ENSG00000138629	UBL7	20.9072	4.8344	TRUE	FALSE
ENSG00000173113	TRMT112	34.1969	4.82826	TRUE	FALSE
ENSG00000242028	HYPK	31.9373	4.82405	TRUE	FALSE
ENSG00000117984	CTSD	400	4.82295	TRUE	FALSE
ENSG00000135390	ATP5G2	400	4.81707	TRUE	TRUE
ENSG00000270617	URGCP-MRPS24	14.9773	4.81452	TRUE	TRUE
ENSG00000182117	NOP10	53.8958	4.80981	TRUE	FALSE
ENSG00000109099	PMP22	6.41328	4.80688	FALSE	FALSE
ENSG00000127922	SHFM1	18.6702	4.80688	TRUE	FALSE
ENSG00000170266	GLB1	19.0916	4.80273	TRUE	FALSE
ENSG00000179091	CYC1	32.5912	4.80084	TRUE	TRUE
ENSG00000197982	C1orf122	23.5487	4.79814	TRUE	FALSE
ENSG00000174021	GNG5	22.164	4.79194	TRUE	TRUE
ENSG00000142168	SOD1	25.0137	4.78861	TRUE	TRUE
ENSG00000151176	PLBD2	12.5842	4.78861	TRUE	FALSE
ENSG00000099385	BCL7C	9.59227	4.78861	TRUE	FALSE
ENSG00000138085	ATRAID	20.2003	4.78726	TRUE	FALSE
ENSG00000125148	MT2A	31.2836	4.78514	TRUE	FALSE
ENSG00000204922	C11orf83	8.5074	4.78397	TRUE	FALSE
ENSG00000131148	EMC8	6.41328	4.78242	FALSE	FALSE
ENSG00000105404	RABAC1	84.0932	4.78105	TRUE	FALSE
ENSG00000184924	PTRHD1	19.7998	4.77748	TRUE	FALSE
ENSG00000149948	HMGA2	6.11537	4.77618	FALSE	FALSE
ENSG00000083845	RPS5	400	4.77593	TRUE	FALSE
ENSG00000065518	NDUFB4	9.43149	4.76829	TRUE	TRUE
ENSG00000169976	SF3B5	57.3618	4.76646	TRUE	FALSE
ENSG00000164405	UQCRQ	400	4.76622	TRUE	TRUE
ENSG00000198937	CCDC167	37.4266	4.76149	TRUE	FALSE
ENSG00000004059	ARF5	49.133	4.76145	TRUE	TRUE
ENSG00000197747	S100A10	12.862	4.76032	TRUE	FALSE
ENSG00000100412	ACO2	6.63127	4.75675	FALSE	TRUE
ENSG00000171530	TBCA	14.2368	4.75639	TRUE	FALSE
ENSG00000167397	VKORC1	19.4722	4.75442	TRUE	FALSE
ENSG00000215021	PHB2	37.2244	4.75363	TRUE	TRUE
ENSG00000166441	RPL27A	47.2361	4.75092	TRUE	FALSE
ENSG00000166136	NDUFB8	19.8743	4.74619	TRUE	TRUE
ENSG00000128463	EMC4	10.933	4.74575	TRUE	FALSE
ENSG00000140545	MFGE8	36.0155	4.74472	TRUE	FALSE
MI0016792	hsa-mir-4449	5.55207	4.74411	FALSE	FALSE
ENSG00000115652	UXS1	5.22467	4.74411	FALSE	FALSE
ENSG00000122705	CLTA	7.76033	4.73973	TRUE	FALSE
ENSG00000116670	MAD2L2	16.4109	4.73708	TRUE	FALSE
ENSG00000119655	NPC2	5.521	4.73421	FALSE	FALSE
ENSG00000108479	GALK1	25.6709	4.73226	TRUE	FALSE
ENSG00000110955	ATP5B	34.4146	4.73129	TRUE	TRUE
ENSG00000204568	MRPS18B	11.7007	4.72892	TRUE	TRUE
lncRNA|lnc-SHC3-5	lnc-SHC3-5	17.2666	4.72837	TRUE	FALSE
ENSG00000114554	PLXNA1	8.04517	4.72585	TRUE	FALSE
ENSG00000103152	MPG	21.304	4.72341	TRUE	FALSE
ENSG00000130255	RPL36	87.8975	4.71907	TRUE	FALSE
ENSG00000198171	DDRGK1	45.3659	4.71863	TRUE	FALSE
ENSG00000135916	ITM2C	24.0732	4.71803	TRUE	FALSE
ENSG00000074800	ENO1	400	4.71753	TRUE	FALSE
ENSG00000221983	UBA52	400	4.71753	TRUE	FALSE
ENSG00000140264	SERF2	400	4.7123	TRUE	FALSE
ENSG00000164885	CDK5	26.188	4.71219	TRUE	FALSE
ENSG00000137100	DCTN3	18.4708	4.70922	TRUE	FALSE
ENSG00000242372	EIF6	41.1002	4.7029	TRUE	FALSE
ENSG00000105755	ETHE1	5.83741	4.70017	FALSE	TRUE
ENSG00000168393	DTYMK	25.8429	4.69121	TRUE	TRUE
ENSG00000100220	RTCB	10.4819	4.69121	TRUE	FALSE
ENSG00000164967	RPP25L	8.71988	4.68787	TRUE	FALSE
ENSG00000117419	ERI3	26.299	4.68531	TRUE	FALSE
ENSG00000100804	PSMB5	20.334	4.68432	TRUE	FALSE
ENSG00000088832	FKBP1A	19.452	4.68134	TRUE	FALSE
ENSG00000096080	MRPS18A	20.8072	4.68038	TRUE	TRUE
ENSG00000239672	NME1	60.0172	4.67406	TRUE	FALSE
ENSG00000105677	TMEM147	9.14943	4.67295	TRUE	FALSE
ENSG00000163468	CCT3	80.5683	4.66813	TRUE	FALSE
ENSG00000163931	TKT	28.5108	4.66707	TRUE	TRUE
ENSG00000171044	XKR6	8.8073	4.66568	TRUE	FALSE
ENSG00000126254	RBM42	22.6751	4.66568	TRUE	FALSE
ENSG00000159377	PSMB4	25.126	4.66568	TRUE	FALSE
ENSG00000090266	NDUFB2	29.2278	4.66568	TRUE	TRUE
ENSG00000104960	PTOV1	33.6995	4.66476	TRUE	FALSE
ENSG00000170892	TSEN34	15.5672	4.66283	TRUE	FALSE
ENSG00000214736	TOMM6	32.2971	4.66277	TRUE	TRUE
ENSG00000117450	PRDX1	38.2788	4.66275	TRUE	FALSE
ENSG00000136930	PSMB7	25.1585	4.66079	TRUE	FALSE
ENSG00000107874	CUEDC2	20.7456	4.66038	TRUE	FALSE
ENSG00000110107	PRPF19	30.5506	4.65415	TRUE	FALSE
ENSG00000128228	SDF2L1	19.0325	4.65273	TRUE	FALSE
ENSG00000174165	ZDHHC24	8.57787	4.65049	TRUE	FALSE
ENSG00000116871	MAP7D1	12.7053	4.65041	TRUE	FALSE
ENSG00000177697	CD151	29.347	4.64875	TRUE	FALSE
ENSG00000108561	C1QBP	22.7813	4.64779	TRUE	TRUE
ENSG00000167815	PRDX2	400	4.64481	TRUE	TRUE
ENSG00000147155	EBP	14.3882	4.63836	TRUE	FALSE
ENSG00000089280	FUS	29.2816	4.63316	TRUE	FALSE
ENSG00000165502	RPL36AL	11.7007	4.63072	TRUE	FALSE
ENSG00000228474	OST4	25.1916	4.62848	TRUE	FALSE
ENSG00000178951	ZBTB7A	16.3082	4.62704	TRUE	FALSE
ENSG00000148411	NACC2	5.22467	4.62559	FALSE	FALSE
ENSG00000172586	CHCHD1	13.2681	4.62559	TRUE	TRUE
ENSG00000219928	RP11-40C6.2	5.22467	4.62559	FALSE	FALSE
ENSG00000123349	PFDN5	43.4042	4.62333	TRUE	FALSE
ENSG00000143106	PSMA5	13.2131	4.62107	TRUE	FALSE
ENSG00000115484	CCT4	21.5634	4.62023	TRUE	FALSE
ENSG00000183648	NDUFB1	18.9049	4.6153	TRUE	TRUE
ENSG00000110492	MDK	61.1316	4.61482	TRUE	FALSE
ENSG00000179958	DCTPP1	16.2997	4.61423	TRUE	FALSE
ENSG00000074582	BCS1L	7.5615	4.6139	TRUE	TRUE
ENSG00000151366	NDUFC2	24.6384	4.61376	TRUE	TRUE
ENSG00000179933	C14orf119	5.55207	4.61259	FALSE	FALSE
ENSG00000248167	TRIM39-RPP21	11.2068	4.61259	TRUE	FALSE
ENSG00000135047	CTSL	16.0525	4.61089	TRUE	FALSE
ENSG00000131153	GINS2	9.72372	4.60821	TRUE	FALSE
ENSG00000185475	TMEM179B	26.1894	4.60592	TRUE	FALSE
ENSG00000099814	CEP170B	8.02827	4.60468	TRUE	FALSE
ENSG00000065320	NTN1	12.8691	4.60352	TRUE	FALSE
ENSG00000082515	MRPL22	10.3197	4.60002	TRUE	TRUE
ENSG00000173272	MZT2A	17.5028	4.59927	TRUE	FALSE
ENSG00000168701	TMEM208	13.9835	4.59802	TRUE	FALSE
ENSG00000063177	RPL18	400	4.59676	TRUE	FALSE
ENSG00000088038	CNOT3	11.0355	4.59399	TRUE	FALSE
ENSG00000148834	GSTO1	16.3082	4.59399	TRUE	TRUE
ENSG00000160446	ZDHHC12	13.0486	4.59211	TRUE	FALSE
ENSG00000250479	CHCHD10	35.435	4.59076	TRUE	TRUE
ENSG00000161671	EMC10	39.5496	4.58979	TRUE	FALSE
ENSG00000178127	NDUFV2	15.4263	4.58859	TRUE	TRUE
ENSG00000161036	LRWD1	10.0118	4.58859	TRUE	FALSE
ENSG00000243449	C4orf48	31.8082	4.58799	TRUE	FALSE
ENSG00000114023	FAM162A	5.21884	4.58451	FALSE	TRUE
ENSG00000100028	SNRPD3	14.4633	4.58197	TRUE	FALSE
ENSG00000161677	JOSD2	7.19353	4.58178	TRUE	FALSE
ENSG00000182199	SHMT2	26.7309	4.58111	TRUE	TRUE
ENSG00000185043	CIB1	28.7294	4.57989	TRUE	FALSE
ENSG00000259494	MRPL46	9.70733	4.57904	TRUE	TRUE
ENSG00000173486	FKBP2	7.1917	4.57904	TRUE	FALSE
ENSG00000085998	POMGNT1	3.7551	4.57904	FALSE	FALSE
ENSG00000134419	RPS15A	49.3419	4.57745	TRUE	TRUE
ENSG00000164258	NDUFS4	11.0123	4.57594	TRUE	TRUE
ENSG00000204316	MRPL38	16.1926	4.57398	TRUE	TRUE
ENSG00000197728	RPS26	9.43625	4.57213	TRUE	FALSE
ENSG00000072682	P4HA2	5.22467	4.57213	FALSE	FALSE
ENSG00000185825	BCAP31	57.279	4.56973	TRUE	FALSE
ENSG00000246705	H2AFJ	7.60851	4.56935	TRUE	FALSE
ENSG00000034510	TMSB10	63.8163	4.56886	TRUE	FALSE
ENSG00000063241	ISOC2	11.4157	4.56866	TRUE	TRUE
ENSG00000114631	PODXL2	18.7912	4.56836	TRUE	FALSE
ENSG00000130725	UBE2M	28.948	4.56808	TRUE	FALSE
ENSG00000132432	SEC61G	16.9629	4.56336	TRUE	FALSE
ENSG00000197182	FLJ27365	6.34221	4.56236	FALSE	FALSE
ENSG00000140365	COMMD4	23.4862	4.56128	TRUE	FALSE
ENSG00000175756	AURKAIP1	36.9512	4.5571	TRUE	TRUE
ENSG00000169714	CNBP	14.6826	4.55687	TRUE	FALSE
ENSG00000137038	TMEM261	20.621	4.5544	TRUE	FALSE
ENSG00000147889	CDKN2A	49.8379	4.55246	TRUE	FALSE
ENSG00000173141	MRP63	18.164	4.55057	TRUE	FALSE
ENSG00000185262	UBALD2	5.521	4.54959	FALSE	FALSE
ENSG00000142534	RPS11	400	4.5485	TRUE	FALSE
ENSG00000100138	NHP2L1	76.6043	4.54578	TRUE	FALSE
ENSG00000108523	RNF167	23.4939	4.54384	TRUE	FALSE
ENSG00000226976	COX6A1P2	5.22467	4.54384	FALSE	FALSE
ENSG00000117691	NENF	14.5389	4.54312	TRUE	FALSE
ENSG00000106268	NUDT1	26.5439	4.54204	TRUE	FALSE
ENSG00000179222	MAGED1	16.2952	4.54192	TRUE	FALSE
ENSG00000172172	MRPL13	6.90802	4.53367	FALSE	TRUE
ENSG00000150760	DOCK1	4.3401	4.53367	FALSE	FALSE
ENSG00000161956	SENP3	14.5702	4.53301	TRUE	FALSE
ENSG00000183978	COA3	19.6595	4.53242	TRUE	TRUE
ENSG00000123131	PRDX4	11.5911	4.53172	TRUE	TRUE
ENSG00000111716	LDHB	38.3032	4.52927	TRUE	TRUE
ENSG00000197746	PSAP	82.531	4.52798	TRUE	FALSE
ENSG00000115234	SNX17	25.8556	4.52763	TRUE	FALSE
ENSG00000213614	HEXA	27.9449	4.52641	TRUE	FALSE
ENSG00000171421	MRPL36	7.54477	4.52336	TRUE	TRUE
ENSG00000127948	POR	31.5717	4.5216	TRUE	FALSE
ENSG00000171345	KRT19	10.3197	4.51889	TRUE	FALSE
ENSG00000100319	ZMAT5	14.8557	4.5165	TRUE	FALSE
ENSG00000259112	NDUFC2-KCTD14	7.01028	4.5159	TRUE	TRUE
ENSG00000134809	TIMM10	7.81849	4.5159	TRUE	TRUE
ENSG00000044090	CUL7	6.12339	4.51439	FALSE	FALSE
ENSG00000160293	VAV2	7.74936	4.51214	TRUE	FALSE
ENSG00000108774	RAB5C	16.1578	4.50836	TRUE	FALSE
ENSG00000188229	TUBB4B	34.85	4.5083	TRUE	FALSE
ENSG00000189159	HN1	54.5966	4.50827	TRUE	FALSE
ENSG00000198858	R3HDM4	25.2488	4.5074	TRUE	FALSE
ENSG00000134202	GSTM3	10.2524	4.50714	TRUE	FALSE
ENSG00000130208	APOC1	5.77893	4.50684	FALSE	FALSE
ENSG00000090674	MCOLN1	6.34221	4.50303	FALSE	FALSE
ENSG00000136295	TTYH3	14.2984	4.50303	TRUE	FALSE
ENSG00000130429	ARPC1B	4.63413	4.49613	FALSE	FALSE
ENSG00000126432	PRDX5	51.1053	4.4949	TRUE	TRUE
ENSG00000131469	RPL27	56.3397	4.49471	TRUE	FALSE
ENSG00000166823	MESP1	9.47281	4.49227	TRUE	FALSE
ENSG00000161939	RNASEK-C17orf49	69.4055	4.49191	TRUE	FALSE
ENSG00000196683	TOMM7	20.9079	4.48749	TRUE	TRUE
ENSG00000177600	RPLP2	400	4.48585	TRUE	FALSE
ENSG00000132963	POMP	17.2626	4.48024	TRUE	FALSE
ENSG00000175416	CLTB	35.0466	4.47924	TRUE	FALSE
ENSG00000125505	MBOAT7	18.0343	4.47779	TRUE	FALSE
ENSG00000113758	DBN1	23.4845	4.47603	TRUE	FALSE
ENSG00000172366	FAM195A	8.56165	4.47581	TRUE	TRUE
ENSG00000165264	NDUFB6	6.09213	4.47475	FALSE	TRUE
ENSG00000143158	MPC2	10.6595	4.47475	TRUE	TRUE
ENSG00000103266	STUB1	16.3248	4.47104	TRUE	FALSE
ENSG00000181610	MRPS23	8.15798	4.46976	TRUE	TRUE
ENSG00000110057	UNC93B1	3.7551	4.46784	FALSE	FALSE
ENSG00000066117	SMARCD1	11.7506	4.46733	TRUE	FALSE
ENSG00000147955	SIGMAR1	52.0248	4.46578	TRUE	FALSE
ENSG00000204520	MICA	5.49844	4.45816	FALSE	FALSE
ENSG00000073578	SDHA	17.4588	4.45775	TRUE	TRUE
ENSG00000103363	TCEB2	12.7053	4.45425	TRUE	FALSE
ENSG00000137288	UQCC2	25.2884	4.45399	TRUE	TRUE
lncRNA|lnc-SELENON-2	lnc-SELENON-2	5.26742	4.45327	FALSE	FALSE
ENSG00000150991	UBC	40.9306	4.45039	TRUE	FALSE
ENSG00000197756	RPL37A	400	4.4497	TRUE	FALSE
ENSG00000244187	TMEM141	6.40998	4.44752	FALSE	FALSE
ENSG00000116221	MRPL37	400	4.4472	TRUE	TRUE
ENSG00000213719	CLIC1	27.6085	4.44669	TRUE	FALSE
ENSG00000185024	BRF1	4.70047	4.44669	FALSE	FALSE
ENSG00000269955	C7orf55	19.9709	4.44656	TRUE	FALSE
ENSG00000133027	PEMT	23.5106	4.44603	TRUE	FALSE
ENSG00000075142	SRI	22.3698	4.44172	TRUE	FALSE
lncRNA|lnc-SETX-1	lnc-SETX-1	17.9325	4.44034	TRUE	FALSE
ENSG00000176101	SSNA1	21.6476	4.44027	TRUE	FALSE
ENSG00000167553	TUBA1C	23.5106	4.43539	TRUE	FALSE
ENSG00000163382	APOA1BP	23.4073	4.43197	TRUE	TRUE
ENSG00000106367	AP1S1	14.5676	4.43084	TRUE	FALSE
ENSG00000234745	HLA-B	17.0281	4.43076	TRUE	FALSE
ENSG00000126457	PRMT1	26.0764	4.43052	TRUE	FALSE
ENSG00000143314	MRPL24	13.6913	4.42548	TRUE	TRUE
ENSG00000241468	ATP5J2	31.0096	4.42116	TRUE	TRUE
ENSG00000103426	PAM16	14.5676	4.42116	TRUE	FALSE
lncRNA|lnc-ODF3L2-1	lnc-ODF3L2-1	4.63413	4.40769	FALSE	FALSE
ENSG00000149925	ALDOA	400	4.40694	TRUE	FALSE
ENSG00000242114	MTFP1	11.6373	4.40345	TRUE	TRUE
ENSG00000172809	RPL38	81.3528	4.40275	TRUE	FALSE
ENSG00000013306	SLC25A39	15.9989	4.39981	TRUE	TRUE
ENSG00000124155	PIGT	20.8072	4.39817	TRUE	FALSE
ENSG00000100029	PES1	11.5911	4.39775	TRUE	FALSE
ENSG00000088356	PDRG1	4.13713	4.39716	FALSE	FALSE
ENSG00000141741	MIEN1	6.41328	4.39716	FALSE	FALSE
ENSG00000005075	POLR2J	56.1637	4.38891	TRUE	FALSE
ENSG00000145050	MANF	37.1934	4.38883	TRUE	FALSE
ENSG00000257390	RP11-762I7.5	29.8397	4.38737	TRUE	FALSE
ENSG00000183172	SMDT1	29.9974	4.38432	TRUE	TRUE
ENSG00000106009	BRAT1	8.20761	4.38288	TRUE	FALSE
ENSG00000068001	HYAL2	6.78998	4.3789	FALSE	FALSE
ENSG00000165283	STOML2	6.78998	4.3789	FALSE	TRUE
ENSG00000099203	TMED1	13.8001	4.37785	TRUE	FALSE
ENSG00000161203	AP2M1	26.188	4.37726	TRUE	FALSE
ENSG00000157020	SEC13	4.41831	4.37563	FALSE	FALSE
ENSG00000168280	KIF5C	9.10727	4.37563	TRUE	FALSE
ENSG00000099341	PSMD8	15.8073	4.37456	TRUE	FALSE
ENSG00000100823	APEX1	12.844	4.37426	TRUE	FALSE
ENSG00000167543	TP53I13	18.5953	4.36771	TRUE	FALSE
lncRNA|H1FX-AS1	H1FX-AS1	5.83741	4.36646	FALSE	FALSE
ENSG00000149541	B3GAT3	11.264	4.36461	TRUE	FALSE
ENSG00000108278	ZNHIT3	14.1356	4.36338	TRUE	FALSE
ENSG00000167085	PHB	42.2772	4.36243	TRUE	TRUE
ENSG00000114902	SPCS1	15.8624	4.35998	TRUE	FALSE
ENSG00000179950	PUF60	28.5268	4.35599	TRUE	FALSE
ENSG00000165678	GHITM	12.0154	4.35249	TRUE	TRUE
ENSG00000173660	UQCRH	22.181	4.35188	TRUE	TRUE
ENSG00000007255	TRAPPC6A	9.72372	4.35092	TRUE	FALSE
ENSG00000085662	AKR1B1	8.13994	4.35029	TRUE	FALSE
ENSG00000230734	RPL10P3	40.3229	4.34986	TRUE	FALSE
ENSG00000000003	TSPAN6	8.20761	4.34588	TRUE	FALSE
ENSG00000123416	TUBA1B	400	4.34231	TRUE	FALSE
ENSG00000146828	SLC12A9	6.34221	4.34207	FALSE	FALSE
ENSG00000182871	COL18A1	11.3131	4.3376	TRUE	FALSE
ENSG00000142676	RPL11	32.9528	4.3376	TRUE	FALSE
ENSG00000182985	CADM1	8.86138	4.33517	TRUE	FALSE
ENSG00000165775	FUNDC2	11.1653	4.33367	TRUE	TRUE
ENSG00000139180	NDUFA9	18.8595	4.33367	TRUE	TRUE
ENSG00000071462	WBSCR22	20.6498	4.33343	TRUE	FALSE
ENSG00000141933	TPGS1	26.4213	4.32745	TRUE	FALSE
ENSG00000213246	SUPT4H1	15.9989	4.32469	TRUE	FALSE
ENSG00000105372	RPS19	46.3586	4.32448	TRUE	FALSE
ENSG00000146122	DAAM2	4.04705	4.32273	FALSE	FALSE
ENSG00000169372	CRADD	3.85704	4.32273	FALSE	FALSE
ENSG00000178982	EIF3K	10.2524	4.32116	TRUE	FALSE
ENSG00000170889	RPS9	31.1509	4.31972	TRUE	FALSE
ENSG00000051523	CYBA	58.7826	4.31955	TRUE	FALSE
ENSG00000148824	MTG1	17.3644	4.31939	TRUE	FALSE
ENSG00000167645	YIF1B	38.1538	4.3192	TRUE	FALSE
ENSG00000137154	RPS6	77.3453	4.31507	TRUE	FALSE
ENSG00000254858	MPV17L2	6.62483	4.31485	FALSE	TRUE
ENSG00000130748	TMEM160	35.435	4.31417	TRUE	FALSE
ENSG00000103197	TSC2	6.24997	4.31286	FALSE	FALSE
ENSG00000100297	MCM5	32.6733	4.31054	TRUE	FALSE
ENSG00000006015	C19orf60	13.2681	4.30865	TRUE	FALSE
ENSG00000242259	C22orf39	14.5583	4.30688	TRUE	FALSE
ENSG00000185838	GNB1L	4.41831	4.30688	FALSE	FALSE
ENSG00000065057	NTHL1	11.9861	4.30688	TRUE	TRUE
ENSG00000125971	DYNLRB1	24.4217	4.30606	TRUE	FALSE
ENSG00000198546	ZNF511	7.27207	4.30437	TRUE	FALSE
ENSG00000143819	EPHX1	15.5672	4.30259	TRUE	FALSE
ENSG00000166794	PPIB	400	4.30149	TRUE	FALSE
ENSG00000065268	WDR18	19.4697	4.30113	TRUE	FALSE
ENSG00000125304	TM9SF2	6.11537	4.29983	FALSE	FALSE
ENSG00000164611	PTTG1	5.21884	4.29983	FALSE	FALSE
lncRNA|lnc-SCGB1D4-2	RP11-703H8.9	5.21884	4.29983	FALSE	FALSE
ENSG00000144029	MRPS5	13.5489	4.29932	TRUE	TRUE
ENSG00000106992	AK1	11.1653	4.29729	TRUE	FALSE
ENSG00000104904	OAZ1	73.7536	4.29497	TRUE	FALSE
ENSG00000086504	MRPL28	25.4072	4.29121	TRUE	TRUE
ENSG00000141873	SLC39A3	10.5897	4.29066	TRUE	FALSE
ENSG00000134824	FADS2	21.7409	4.2902	TRUE	FALSE
ENSG00000182379	NXPH4	6.63127	4.2893	FALSE	FALSE
ENSG00000116044	NFE2L2	6.09098	4.28861	FALSE	FALSE
ENSG00000166313	APBB1	6.06022	4.28861	FALSE	FALSE
ENSG00000005486	RHBDD2	18.0109	4.28573	TRUE	FALSE
ENSG00000172757	CFL1	400	4.28464	TRUE	FALSE
ENSG00000159228	CBR1	8.33351	4.28346	TRUE	FALSE
ENSG00000108961	RANGRF	7.5615	4.28242	TRUE	FALSE
ENSG00000127418	FGFRL1	6.41328	4.28242	FALSE	FALSE
ENSG00000143947	RPS27A	44.2323	4.28187	TRUE	FALSE
ENSG00000182512	GLRX5	5.6514	4.27993	FALSE	TRUE
ENSG00000110651	CD81	57.8584	4.27735	TRUE	FALSE
ENSG00000126602	TRAP1	43.1461	4.27731	TRUE	TRUE
ENSG00000101363	MANBAL	6.11537	4.27618	FALSE	FALSE
ENSG00000102977	ACD	3.57816	4.27618	FALSE	FALSE
ENSG00000105669	COPE	32.639	4.27594	TRUE	FALSE
ENSG00000184840	TMED9	19.8767	4.27393	TRUE	FALSE
ENSG00000084234	APLP2	21.3756	4.27362	TRUE	FALSE
ENSG00000104889	RNASEH2A	12.5578	4.27356	TRUE	FALSE
ENSG00000089220	PEBP1	70.8534	4.27205	TRUE	FALSE
ENSG00000147799	ARHGAP39	10.4713	4.27198	TRUE	FALSE
ENSG00000174851	YIF1A	19.7369	4.26947	TRUE	FALSE
ENSG00000213465	ARL2	9.88412	4.26903	TRUE	TRUE
ENSG00000230055	CISD3	14.4475	4.26309	TRUE	TRUE
ENSG00000198879	SFMBT2	3.17513	4.26139	FALSE	FALSE
ENSG00000244313	RP11-425L10.1	6.34221	4.26032	FALSE	FALSE
ENSG00000172985	SH3RF3	4.04705	4.25711	FALSE	FALSE
ENSG00000269893	SNHG8	7.76033	4.25711	TRUE	FALSE
ENSG00000109390	NDUFC1	12.4299	4.25469	TRUE	TRUE
ENSG00000128626	MRPS12	10.5997	4.25218	TRUE	TRUE
ENSG00000100632	ERH	45.0644	4.25216	TRUE	FALSE
ENSG00000126067	PSMB2	12.0154	4.25208	TRUE	FALSE
ENSG00000106605	BLVRA	7.30926	4.25064	TRUE	FALSE
ENSG00000150779	TIMM8B	11.0123	4.24738	TRUE	TRUE
ENSG00000163191	S100A11	14.2174	4.24702	TRUE	FALSE
ENSG00000170043	TRAPPC1	29.7072	4.24128	TRUE	FALSE
ENSG00000006042	TMEM98	12.5816	4.2409	TRUE	FALSE
ENSG00000105258	POLR2I	17.0844	4.24082	TRUE	FALSE
ENSG00000117592	PRDX6	20.4848	4.24	TRUE	TRUE
ENSG00000087088	BAX	25.1898	4.23933	TRUE	TRUE
ENSG00000107281	NPDC1	17.4971	4.23807	TRUE	FALSE
ENSG00000068903	SIRT2	8.83409	4.23679	TRUE	FALSE
ENSG00000068697	LAPTM4A	7.90797	4.23587	TRUE	FALSE
ENSG00000105255	FSD1	15.5326	4.23504	TRUE	FALSE
ENSG00000108528	SLC25A11	22.3409	4.23209	TRUE	TRUE
ENSG00000141696	LEPREL4	10.4848	4.23199	TRUE	FALSE
ENSG00000099804	CDC34	8.18937	4.23036	TRUE	FALSE
ENSG00000079462	PAFAH1B3	21.4149	4.22997	TRUE	FALSE
ENSG00000179010	MRFAP1	14.3882	4.22864	TRUE	FALSE
ENSG00000138175	ARL3	5.00345	4.22641	FALSE	FALSE
ENSG00000082781	ITGB5	3.4644	4.22641	FALSE	FALSE
ENSG00000101464	PIGU	9.72372	4.22454	TRUE	FALSE
ENSG00000166557	TMED3	8.06971	4.22191	TRUE	FALSE
ENSG00000241837	ATP5O	25.7453	4.22097	TRUE	TRUE
ENSG00000031698	SARS	13.1544	4.21588	TRUE	FALSE
ENSG00000172889	EGFL7	7.29943	4.21466	TRUE	FALSE
ENSG00000132507	EIF5A	57.5143	4.21399	TRUE	FALSE
ENSG00000113558	SKP1	23.1384	4.21331	TRUE	FALSE
ENSG00000091640	SPAG7	9.38096	4.21055	TRUE	FALSE
ENSG00000164733	CTSB	9.18695	4.20941	TRUE	FALSE
ENSG00000111669	TPI1	400	4.20568	TRUE	TRUE
ENSG00000100577	GSTZ1	5.54508	4.20481	FALSE	TRUE
ENSG00000037241	RPL26L1	7.76033	4.20365	TRUE	FALSE
ENSG00000198918	RPL39	19.4722	4.20365	TRUE	FALSE
ENSG00000169021	UQCRFS1	7.80678	4.20365	TRUE	TRUE
ENSG00000115758	ODC1	18.6863	4.20365	TRUE	FALSE
ENSG00000244038	DDOST	41.4464	4.20352	TRUE	FALSE
ENSG00000100591	AHSA1	18.7912	4.20325	TRUE	FALSE
ENSG00000182768	NGRN	35.4259	4.19968	TRUE	TRUE
ENSG00000041357	PSMA4	14.1116	4.19843	TRUE	FALSE
ENSG00000055950	MRPL43	18.3338	4.19761	TRUE	TRUE
ENSG00000137200	CMTR1	5.88237	4.19746	FALSE	FALSE
ENSG00000186184	POLR1D	6.09213	4.19746	FALSE	FALSE
ENSG00000134056	MRPS36	5.88237	4.19746	FALSE	TRUE
ENSG00000198715	C1orf85	13.8301	4.19746	TRUE	FALSE
ENSG00000172009	THOP1	12.2704	4.19481	TRUE	FALSE
ENSG00000130312	MRPL34	7.90745	4.19121	TRUE	TRUE
ENSG00000232388	LINC00493	10.337	4.19121	TRUE	FALSE
ENSG00000213593	TMX2	4.3401	4.18964	FALSE	FALSE
ENSG00000161057	PSMC2	6.90802	4.1861	FALSE	FALSE
ENSG00000006327	TNFRSF12A	3.85704	4.18491	FALSE	FALSE
ENSG00000166145	SPINT1	4.92902	4.18491	FALSE	FALSE
ENSG00000105767	CADM4	4.11144	4.18491	FALSE	FALSE
ENSG00000170421	KRT8	44.5349	4.18438	TRUE	FALSE
ENSG00000108294	PSMB3	25.2296	4.1833	TRUE	FALSE
ENSG00000262814	MRPL12	400	4.18313	TRUE	TRUE
ENSG00000130005	GAMT	15.5326	4.18214	TRUE	FALSE
ENSG00000106211	HSPB1	15.9196	4.181	TRUE	FALSE
ENSG00000179115	FARSA	31.8933	4.17616	TRUE	FALSE
ENSG00000196961	AP2A1	5.49844	4.17536	FALSE	FALSE
ENSG00000101220	C20orf27	13.4726	4.17536	TRUE	FALSE
ENSG00000188243	COMMD6	4.38638	4.17536	FALSE	FALSE
lncRNA|lnc-ANGPTL2-2	lnc-ANGPTL2-2	5.54508	4.17536	FALSE	FALSE
ENSG00000102109	PCSK1N	10.8794	4.17536	TRUE	FALSE
ENSG00000105329	TGFB1	13.9835	4.17215	TRUE	FALSE
ENSG00000145741	BTF3	18.8013	4.16831	TRUE	FALSE
ENSG00000138074	SLC5A6	5.81792	4.16811	FALSE	FALSE
ENSG00000105204	DYRK1B	7.30926	4.16811	TRUE	FALSE
ENSG00000269955	LUC7L2	5.55637	4.16811	FALSE	TRUE
ENSG00000204220	PFDN6	12.7053	4.16738	TRUE	FALSE
ENSG00000198034	RPS4X	400	4.16649	TRUE	FALSE
ENSG00000163882	POLR2H	14.5775	4.16568	TRUE	FALSE
ENSG00000155876	RRAGA	14.1116	4.16323	TRUE	FALSE
ENSG00000118705	RPN2	19.2486	4.16242	TRUE	FALSE
ENSG00000106399	RPA3	6.41328	4.16079	FALSE	FALSE
ENSG00000205937	RNPS1	4.66269	4.16079	FALSE	FALSE
ENSG00000104805	NUCB1	16.0207	4.16005	TRUE	FALSE
ENSG00000159685	CHCHD6	11.4603	4.15696	TRUE	TRUE
ENSG00000172270	BSG	73.9906	4.15675	TRUE	FALSE
ENSG00000105438	KDELR1	64.4764	4.15633	TRUE	FALSE
ENSG00000187764	SEMA4D	14.9194	4.1553	TRUE	FALSE
ENSG00000123144	C19orf43	18.3756	4.15504	TRUE	FALSE
ENSG00000177666	PNPLA2	14.012	4.15416	TRUE	FALSE
ENSG00000180879	SSR4	74.3199	4.15397	TRUE	FALSE
ENSG00000102030	NAA10	16.6292	4.1509	TRUE	FALSE
ENSG00000084754	HADHA	15.9299	4.15075	TRUE	TRUE
ENSG00000126246	IGFLR1	4.13713	4.14841	FALSE	FALSE
ENSG00000168101	NUDT16L1	11.5911	4.14813	TRUE	FALSE
ENSG00000123545	NDUFAF4	6.76462	4.14779	FALSE	TRUE
ENSG00000184897	H1FX	64.3945	4.14735	TRUE	FALSE
ENSG00000131475	VPS25	41.8759	4.14628	TRUE	FALSE
ENSG00000117318	ID3	10.7505	4.14591	TRUE	FALSE
ENSG00000125445	MRPS7	5.99446	4.14591	FALSE	TRUE
ENSG00000184702	SEPT5	5.55637	4.14591	FALSE	FALSE
ENSG00000014164	ZC3H3	4.41831	4.14591	FALSE	FALSE
ENSG00000182500	ORAI1	5.14752	4.1434	FALSE	FALSE
ENSG00000105364	MRPL4	28.9648	4.1434	TRUE	TRUE
ENSG00000131408	NR1H2	5.81753	4.14088	FALSE	FALSE
ENSG00000204435	CSNK2B	19.8439	4.13836	TRUE	FALSE
ENSG00000119771	KLHL29	3.93584	4.13836	FALSE	FALSE
ENSG00000175550	DRAP1	4.66269	4.13455	FALSE	FALSE
ENSG00000105472	CLEC11A	17.9237	4.13455	TRUE	FALSE
ENSG00000108344	PSMD3	26.4172	4.13437	TRUE	FALSE
ENSG00000181885	CLDN7	12.0284	4.13296	TRUE	FALSE
ENSG00000182173	TSEN54	5.23596	4.13264	FALSE	FALSE
ENSG00000089157	RPLP0	6.90802	4.13264	FALSE	FALSE
ENSG00000010256	UQCRC1	30.4733	4.12995	TRUE	TRUE
lncRNA|SNHG25	SNHG25	53.7924	4.1271	TRUE	FALSE
ENSG00000090971	NAT14	19.6674	4.12709	TRUE	FALSE
ENSG00000102978	POLR2C	7.74936	4.12688	TRUE	FALSE
ENSG00000105254	TBCB	6.50671	4.12688	FALSE	FALSE
ENSG00000162585	C1orf86	18.4925	4.1263	TRUE	FALSE
ENSG00000204308	RNF5	11.6486	4.12559	TRUE	FALSE
ENSG00000100442	FKBP3	5.82379	4.12559	FALSE	FALSE
ENSG00000126453	BCL2L12	12.8691	4.12452	TRUE	FALSE
ENSG00000142544	CTU1	9.14943	4.1243	TRUE	FALSE
ENSG00000173457	PPP1R14B	11.6685	4.12375	TRUE	FALSE
ENSG00000259132	HAUS4	5.55637	4.12301	FALSE	FALSE
ENSG00000007520	TSR3	25.6095	4.11993	TRUE	FALSE
ENSG00000134419	RP11-1035H13.3	12.0154	4.11869	TRUE	TRUE
ENSG00000095906	NUBP2	12.0971	4.11844	TRUE	FALSE
ENSG00000139343	SNRPF	28.1766	4.11581	TRUE	FALSE
ENSG00000093010	COMT	13.2822	4.11532	TRUE	TRUE
ENSG00000166171	DPCD	5.21884	4.11521	FALSE	FALSE
ENSG00000130844	ZNF331	5.27369	4.11521	FALSE	FALSE
ENSG00000258289	CHURC1	5.82379	4.11347	FALSE	FALSE
ENSG00000172725	CORO1B	22.5714	4.11259	TRUE	FALSE
ENSG00000108106	UBE2S	400	4.11259	TRUE	FALSE
ENSG00000130305	NSUN5	5.55207	4.11259	FALSE	FALSE
ENSG00000167123	CERCAM	11.4482	4.11259	TRUE	FALSE
ENSG00000163956	LRPAP1	48.471	4.10956	TRUE	FALSE
ENSG00000175130	MARCKSL1	29.7238	4.10938	TRUE	FALSE
ENSG00000235174	RPL39P3	13.206	4.10766	TRUE	FALSE
ENSG00000174744	BRMS1	5.26742	4.10733	FALSE	FALSE
ENSG00000184076	UQCR10	51.7388	4.10733	TRUE	TRUE
ENSG00000109113	RAB34	16.9322	4.10468	TRUE	FALSE
ENSG00000211445	GPX3	4.04705	4.10468	FALSE	FALSE
ENSG00000075415	SLC25A3	27.5014	4.10305	TRUE	TRUE
lncRNA|lnc-PRR14L-1	lnc-PRR14L-1	7.19353	4.10269	TRUE	FALSE
ENSG00000114391	RPL24	16.7936	4.10096	TRUE	FALSE
ENSG00000139219	COL2A1	5.22467	4.09936	FALSE	FALSE
ENSG00000173020	ADRBK1	5.92611	4.09936	FALSE	FALSE
ENSG00000110046	ATG2A	3.57816	4.09936	FALSE	FALSE
ENSG00000214706	IFRD2	10.8468	4.09802	TRUE	FALSE
ENSG00000167397	RP11-196G11.1	12.3482	4.09614	TRUE	FALSE
ENSG00000143575	HAX1	12.8151	4.09579	TRUE	FALSE
ENSG00000115944	COX7A2L	13.2822	4.09399	TRUE	TRUE
ENSG00000101474	APMAP	8.83409	4.0904	TRUE	FALSE
ENSG00000158710	TAGLN2	47.7893	4.09016	TRUE	FALSE
ENSG00000203618	GP1BB	9.14943	4.08994	TRUE	FALSE
ENSG00000187147	RNF220	10.6348	4.08994	TRUE	FALSE
MI0025241	hsa-mir-7705	34.7639	4.08929	TRUE	FALSE
ENSG00000143543	JTB	19.8743	4.08878	TRUE	FALSE
lncRNA|lnc-MRPL14-3	lnc-MRPL14-3	9.14978	4.08859	TRUE	FALSE
ENSG00000130675	MNX1	3.30063	4.08859	FALSE	FALSE
ENSG00000151693	ASAP2	5.00345	4.08451	FALSE	FALSE
ENSG00000062485	CS	8.58792	4.08315	TRUE	TRUE
ENSG00000188976	NOC2L	24.3496	4.08245	TRUE	FALSE
ENSG00000176912	C18orf56	6.50671	4.08178	FALSE	FALSE
ENSG00000110536	PTPMT1	6.19273	4.08178	FALSE	TRUE
ENSG00000130414	NDUFA10	14.0243	4.08178	TRUE	TRUE
ENSG00000169189	NSMCE1	11.0989	4.08071	TRUE	FALSE
ENSG00000153157	TMEM14B	8.00935	4.07904	TRUE	FALSE
ENSG00000160072	ATAD3B	11.8743	4.07866	TRUE	TRUE
ENSG00000137818	RPLP1	30.9125	4.07636	TRUE	FALSE
ENSG00000084090	STARD7	11.0355	4.07582	TRUE	TRUE
ENSG00000109111	SUPT6H	9.14978	4.07559	TRUE	FALSE
ENSG00000130489	SCO2	5.35892	4.0749	FALSE	TRUE
ENSG00000198721	ECI2	6.90802	4.0749	FALSE	TRUE
ENSG00000141971	MVB12A	5.66565	4.07372	FALSE	FALSE
ENSG00000142937	RPS8	26.3098	4.07213	TRUE	FALSE
ENSG00000267263	lnc-SEC14L1-1	4.20052	4.07213	FALSE	FALSE
ENSG00000088256	GNA11	3.17513	4.07213	FALSE	FALSE
ENSG00000178445	GLDC	5.22467	4.07213	FALSE	TRUE
ENSG00000126878	AIF1L	3.17513	4.07213	FALSE	FALSE
ENSG00000124172	ATP5E	20.1074	4.07134	TRUE	TRUE
ENSG00000165688	PMPCA	18.8139	4.07067	TRUE	TRUE
ENSG00000167930	ITFG3	5.521	4.06935	FALSE	FALSE
ENSG00000131100	ATP6V1E1	14.2174	4.06779	TRUE	FALSE
ENSG00000123353	ORMDL2	9.47932	4.06656	TRUE	FALSE
ENSG00000135441	RP11-644F5.10	7.60851	4.06544	TRUE	TRUE
ENSG00000186501	TMEM222	10.2794	4.06446	TRUE	FALSE
ENSG00000182979	MTA1	8.90122	4.06236	TRUE	FALSE
ENSG00000170296	GABARAP	21.2177	4.0617	TRUE	FALSE
ENSG00000158828	PINK1	3.85704	4.06095	FALSE	TRUE
ENSG00000101084	C20orf24	15.5379	4.0605	TRUE	TRUE
ENSG00000168061	SAC3D1	5.74023	4.06024	FALSE	FALSE
ENSG00000102898	NUTF2	14.6854	4.05954	TRUE	FALSE
ENSG00000125877	ITPA	12.053	4.05869	TRUE	FALSE
ENSG00000225697	SLC26A6	3.57816	4.05813	FALSE	FALSE
ENSG00000161526	SAP30BP	6.91668	4.05813	FALSE	FALSE
ENSG00000107679	PLEKHA1	3.57816	4.05813	FALSE	FALSE
ENSG00000031823	RANBP3	3.7551	4.05813	FALSE	FALSE
ENSG00000142089	IFITM3	7.72635	4.05813	TRUE	FALSE
MI0017356	hsa-mir-4721	21.1775	4.05736	TRUE	FALSE
ENSG00000103254	FAM173A	10.5897	4.05592	TRUE	FALSE
ENSG00000131462	TUBG1	6.64061	4.05458	FALSE	FALSE
ENSG00000088986	DYNLL1	12.0465	4.0534	TRUE	FALSE
ENSG00000130881	LRP3	6.09923	4.0534	FALSE	FALSE
ENSG00000232119	MCTS1	9.39674	4.0528	TRUE	FALSE
ENSG00000134333	LDHA	13.44	4.05227	TRUE	FALSE
lncRNA|lnc-MRPL14-3	RP5-1120P11.4	8.86859	4.05197	TRUE	FALSE
ENSG00000128595	CALU	5.521	4.04959	FALSE	FALSE
ENSG00000136877	FPGS	4.66269	4.04959	FALSE	TRUE
ENSG00000128311	TST	10.7173	4.04959	TRUE	TRUE
ENSG00000171282	RP11-1055B8.7	5.27369	4.04959	FALSE	FALSE
ENSG00000032444	PNPLA6	5.521	4.04959	FALSE	FALSE
ENSG00000106305	AIMP2	12.5816	4.04883	TRUE	FALSE
ENSG00000168894	RNF181	20.4051	4.04858	TRUE	FALSE
ENSG00000178719	GRINA	9.55613	4.04844	TRUE	FALSE
ENSG00000158850	B4GALT3	11.7456	4.04744	TRUE	FALSE
ENSG00000087884	AAMDC	5.77893	4.04384	FALSE	FALSE
ENSG00000145022	TCTA	5.22467	4.04384	FALSE	FALSE
ENSG00000113387	SUB1	7.28369	4.04312	TRUE	FALSE
ENSG00000136810	TXN	11.4618	4.04192	TRUE	FALSE
ENSG00000169682	SPNS1	7.72635	4.04192	TRUE	FALSE
ENSG00000105726	ATP13A1	7.90745	4.04143	TRUE	FALSE
ENSG00000168056	LTBP3	13.9031	4.04095	TRUE	FALSE
ENSG00000101473	ACOT8	6.12339	4.03805	FALSE	FALSE
ENSG00000136026	CKAP4	15.5326	4.03797	TRUE	FALSE
ENSG00000100075	SLC25A1	41.8797	4.03743	TRUE	TRUE
ENSG00000204356	NELFE	7.1917	4.03659	TRUE	FALSE
ENSG00000186468	RPS23	9.39674	4.03659	TRUE	FALSE
ENSG00000168476	REEP4	8.73945	4.03611	TRUE	FALSE
ENSG00000134291	TMEM106C	8.8636	4.03586	TRUE	FALSE
ENSG00000119403	PHF19	4.92902	4.03513	FALSE	FALSE
ENSG00000128951	DUT	6.06022	4.03513	FALSE	TRUE
ENSG00000172301	COPRS	13.0486	4.03338	TRUE	FALSE
ENSG00000078808	SDF4	30.8082	4.03221	TRUE	FALSE
ENSG00000072778	ACADVL	33.0482	4.03214	TRUE	TRUE
ENSG00000243279	PRAF2	14.9194	4.03127	TRUE	FALSE
ENSG00000196419	XRCC6	82.9482	4.02965	TRUE	FALSE
ENSG00000167775	CD320	16.9597	4.02868	TRUE	FALSE
ENSG00000141759	TXNL4A	12.5099	4.02853	TRUE	FALSE
ENSG00000092621	PHGDH	23.0445	4.02835	TRUE	FALSE
ENSG00000177954	RPS27	19.6412	4.0277	TRUE	FALSE
ENSG00000105379	ETFB	10.3559	4.02632	TRUE	TRUE
ENSG00000116586	LAMTOR2	10.2017	4.02632	TRUE	FALSE
ENSG00000079459	FDFT1	15.8607	4.02533	TRUE	FALSE
ENSG00000132341	RAN	35.0242	4.02533	TRUE	FALSE
ENSG00000188290	HES4	53.7312	4.02378	TRUE	FALSE
ENSG00000112787	FBRSL1	4.63413	4.02336	FALSE	FALSE
ENSG00000188603	CLN3	13.0311	4.02019	TRUE	FALSE
MI0016054	hsa-mir-3654	4.46676	4.01889	FALSE	FALSE
ENSG00000119632	IFI27L2	5.00345	4.01889	FALSE	FALSE
ENSG00000100263	RHBDD3	9.20055	4.01889	TRUE	FALSE
ENSG00000114353	GNAI2	9.72372	4.01872	TRUE	FALSE
ENSG00000196365	LONP1	12.1009	4.01627	TRUE	TRUE
ENSG00000184436	THAP7	5.81753	4.0159	FALSE	FALSE
ENSG00000179271	GADD45GIP1	27.8278	4.01568	TRUE	TRUE
ENSG00000118680	MYL12B	34.2071	4.01439	TRUE	FALSE
ENSG00000083444	PLOD1	19.4697	4.01439	TRUE	FALSE
ENSG00000134250	NOTCH2	3.7551	4.01439	FALSE	FALSE
ENSG00000241484	PRR5-ARHGAP8	3.7551	4.01439	FALSE	FALSE
ENSG00000156973	PDE6D	4.20052	4.01439	FALSE	FALSE
ENSG00000137267	TUBB2A	8.83409	4.01439	TRUE	FALSE
ENSG00000105518	TMEM205	20.0201	4.01171	TRUE	TRUE
ENSG00000142611	PRDM16	3.4644	4.00836	FALSE	FALSE
ENSG00000158526	TSR2	4.49797	4.00735	FALSE	FALSE
ENSG00000102119	EMD	39.8214	4.00696	TRUE	FALSE
ENSG00000110717	NDUFS8	16.7931	4.00684	TRUE	TRUE
ENSG00000038274	MAT2B	3.93584	4.00684	FALSE	FALSE
ENSG00000109475	RPL34	26.5843	4.00606	TRUE	TRUE
ENSG00000107223	EDF1	71.2805	4.00591	TRUE	FALSE
ENSG00000127774	EMC6	9.32339	4.00271	TRUE	FALSE
ENSG00000115306	SPTBN1	4.38638	3.99921	FALSE	FALSE
ENSG00000133265	HSPBP1	33.6306	3.99908	FALSE	FALSE
ENSG00000105618	PRPF31	17.6328	3.99818	FALSE	FALSE
ENSG00000146540	C7orf50	14.2296	3.99638	FALSE	FALSE
ENSG00000111843	TMEM14C	5.35892	3.99613	FALSE	TRUE
ENSG00000172500	FIBP	5.35892	3.99613	FALSE	FALSE
ENSG00000167526	RPL13	24.6627	3.99437	FALSE	FALSE
ENSG00000143570	SLC39A1	10.0118	3.99407	FALSE	FALSE
ENSG00000100225	FBXO7	7.1917	3.99149	FALSE	FALSE
ENSG00000077942	FBLN1	11.4156	3.99015	FALSE	FALSE
ENSG00000179403	VWA1	3.29644	3.98994	FALSE	FALSE
ENSG00000164897	TMUB1	10.95	3.98932	FALSE	FALSE
ENSG00000185896	LAMP1	35.7332	3.98847	FALSE	FALSE
ENSG00000130402	ACTN4	16.8483	3.98736	FALSE	FALSE
ENSG00000168268	NT5DC2	27.1275	3.98712	FALSE	TRUE
ENSG00000166347	CYB5A	6.62483	3.98682	FALSE	TRUE
ENSG00000120306	CYSTM1	8.06971	3.98369	FALSE	FALSE
ENSG00000164096	C4orf3	4.20052	3.98369	FALSE	FALSE
ENSG00000100294	MCAT	7.51373	3.98212	FALSE	TRUE
ENSG00000105552	BCAT2	14.929	3.98212	FALSE	TRUE
ENSG00000175581	MRPL48	6.12339	3.97739	FALSE	TRUE
ENSG00000243147	MRPL33	25.5126	3.97708	FALSE	TRUE
ENSG00000140553	UNC45A	10.7173	3.97655	FALSE	FALSE
ENSG00000090263	MRPS33	6.06022	3.97581	FALSE	TRUE
ENSG00000040531	CTNS	4.23678	3.97528	FALSE	FALSE
ENSG00000064545	TMEM161A	23.8816	3.97136	FALSE	FALSE
ENSG00000069482	GAL	8.8636	3.97024	FALSE	FALSE
ENSG00000128309	MPST	10.9673	3.97008	FALSE	TRUE
ENSG00000101199	ARFGAP1	3.57816	3.96784	FALSE	FALSE
ENSG00000187713	TMEM203	3.83801	3.96784	FALSE	FALSE
ENSG00000125691	RPL23	400	3.96733	FALSE	FALSE
ENSG00000131584	ACAP3	14.3189	3.96704	FALSE	FALSE
ENSG00000127837	AAMP	22.7031	3.96596	FALSE	FALSE
ENSG00000162517	PEF1	5.6514	3.96591	FALSE	FALSE
ENSG00000175792	RUVBL1	24.3208	3.96543	FALSE	FALSE
ENSG00000254999	BRK1	13.206	3.96543	FALSE	FALSE
ENSG00000168938	PPIC	3.4644	3.96463	FALSE	FALSE
ENSG00000163479	SSR2	14.6988	3.96463	FALSE	FALSE
ENSG00000100348	TXN2	6.62483	3.96463	FALSE	TRUE
ENSG00000170430	MGMT	3.30063	3.96463	FALSE	FALSE
ENSG00000256349	CTD-3074O7.11	11.5835	3.96427	FALSE	FALSE
ENSG00000116260	QSOX1	16.4654	3.9624	FALSE	FALSE
ENSG00000204463	BAG6	24.2052	3.96224	FALSE	FALSE
ENSG00000164889	SLC4A2	9.1072	3.96212	FALSE	FALSE
ENSG00000125755	SYMPK	4.54604	3.96205	FALSE	FALSE
ENSG00000142669	SH3BGRL3	17.0235	3.96025	FALSE	FALSE
ENSG00000011052	NME1-NME2	46.2332	3.95886	FALSE	FALSE
ENSG00000054116	TRAPPC3	16.1516	3.95816	FALSE	FALSE
ENSG00000186197	EDARADD	7.47926	3.95707	FALSE	FALSE
ENSG00000143771	CNIH4	10.2524	3.9562	FALSE	FALSE
ENSG00000213619	NDUFS3	15.7561	3.95599	FALSE	TRUE
ENSG00000141959	PFKL	33.4133	3.95572	FALSE	FALSE
ENSG00000182612	TSPAN10	3.02461	3.9549	FALSE	FALSE
ENSG00000107262	BAG1	3.02461	3.9549	FALSE	FALSE
ENSG00000100097	LGALS1	4.13713	3.9549	FALSE	FALSE
ENSG00000104812	GYS1	4.66269	3.95327	FALSE	FALSE
ENSG00000144504	ANKMY1	3.71954	3.95163	FALSE	FALSE
lncRNA|lnc-KLRB1-12	LOH12CR2	4.94021	3.95163	FALSE	FALSE
ENSG00000115268	RPS15	43.8534	3.9512	FALSE	FALSE
ENSG00000145592	RPL37	19.6427	3.95022	FALSE	FALSE
ENSG00000102144	PGK1	8.37316	3.9479	FALSE	FALSE
ENSG00000130731	C16orf13	12.1485	3.94779	FALSE	FALSE
ENSG00000091947	TMEM101	4.11144	3.94669	FALSE	FALSE
ENSG00000182534	MXRA7	5.21884	3.94669	FALSE	FALSE
ENSG00000140511	HAPLN3	4.70047	3.94669	FALSE	FALSE
ENSG00000127564	PKMYT1	15.6205	3.94636	FALSE	FALSE
ENSG00000183684	ALYREF	69.6933	3.94471	FALSE	FALSE
ENSG00000125166	GOT2	16.73	3.94338	FALSE	TRUE
ENSG00000150753	CCT5	15.3729	3.94302	FALSE	FALSE
ENSG00000010278	CD9	12.3482	3.94289	FALSE	FALSE
ENSG00000077348	EXOSC5	14.1246	3.94267	FALSE	FALSE
ENSG00000231500	RPS18	32.9054	3.94172	FALSE	TRUE
ENSG00000158042	MRPL17	11.4482	3.94062	FALSE	TRUE
ENSG00000248098	BCKDHA	4.41831	3.93839	FALSE	TRUE
ENSG00000131188	PRR7	8.90122	3.93839	FALSE	FALSE
ENSG00000092010	PSME1	4.76065	3.93839	FALSE	FALSE
ENSG00000206503	HLA-A	7.88466	3.93714	FALSE	FALSE
ENSG00000111481	COPZ1	7.21069	3.93616	FALSE	FALSE
ENSG00000116857	TMEM9	8.9225	3.93588	FALSE	FALSE
ENSG00000125870	SNRPB2	8.33351	3.93588	FALSE	FALSE
ENSG00000142252	GEMIN7	8.33351	3.93588	FALSE	FALSE
ENSG00000067225	PKM	400	3.93405	FALSE	FALSE
ENSG00000214114	MYCBP	5.82379	3.93393	FALSE	FALSE
ENSG00000133318	RTN3	4.52679	3.9337	FALSE	FALSE
lncRNA|SNHG25	SNORA76	60.4944	3.9336	FALSE	FALSE
ENSG00000100347	SAMM50	15.1323	3.93337	FALSE	TRUE
ENSG00000089597	GANAB	18.8595	3.93295	FALSE	FALSE
ENSG00000102007	PLP2	15.6876	3.93237	FALSE	FALSE
ENSG00000084693	AGBL5	13.1974	3.93126	FALSE	FALSE
ENSG00000167536	DHRS13	5.98974	3.92943	FALSE	FALSE
ENSG00000196924	FLNA	69.722	3.92799	FALSE	FALSE
ENSG00000113811	SELK	4.30412	3.92763	FALSE	FALSE
ENSG00000160256	FAM207A	4.2466	3.92661	FALSE	FALSE
ENSG00000108604	SMARCD2	8.33029	3.92661	FALSE	FALSE
ENSG00000103024	NME3	32.6733	3.92569	FALSE	TRUE
ENSG00000143870	PDIA6	10.3005	3.92536	FALSE	FALSE
ENSG00000002822	MAD1L1	4.75491	3.92218	FALSE	FALSE
ENSG00000198242	RPL23A	8.86329	3.92188	FALSE	FALSE
ENSG00000169727	GPS1	51.7849	3.91971	FALSE	FALSE
ENSG00000104823	ECH1	8.33351	3.9185	FALSE	TRUE
ENSG00000198626	RYR2	4.20052	3.91807	FALSE	FALSE
ENSG00000157456	CCNB2	6.91668	3.91807	FALSE	FALSE
ENSG00000184752	NDUFA12	4.46676	3.91807	FALSE	TRUE
ENSG00000108641	B9D1	12.9229	3.91807	FALSE	FALSE
ENSG00000176014	TUBB6	3.7551	3.91807	FALSE	FALSE
ENSG00000163481	RNF25	3.30063	3.91807	FALSE	FALSE
ENSG00000135446	CDK4	22.2775	3.9162	FALSE	FALSE
ENSG00000114125	RNF7	6.09923	3.91463	FALSE	FALSE
ENSG00000109062	SLC9A3R1	12.9226	3.91394	FALSE	FALSE
ENSG00000106682	EIF4H	4.52679	3.91394	FALSE	FALSE
ENSG00000004779	NDUFAB1	13.3582	3.91394	FALSE	TRUE
ENSG00000105202	FBL	28.9642	3.9135	FALSE	FALSE
ENSG00000241484	ARHGAP8	5.09917	3.91117	FALSE	FALSE
ENSG00000116691	MIIP	5.09917	3.91117	FALSE	FALSE
ENSG00000172663	TMEM134	5.28997	3.91117	FALSE	FALSE
ENSG00000204422	XXbac-BPG32J3.20	6.06022	3.91117	FALSE	FALSE
ENSG00000115216	NRBP1	15.6434	3.9104	FALSE	FALSE
ENSG00000063438	PDCD6	12.7418	3.90624	FALSE	FALSE
ENSG00000007047	MARK4	8.11558	3.90595	FALSE	FALSE
ENSG00000170291	ELP5	10.4848	3.90507	FALSE	FALSE
ENSG00000106245	BUD31	32.8557	3.90407	FALSE	FALSE
ENSG00000168439	STIP1	33.0725	3.90158	FALSE	FALSE
ENSG00000147403	RPL10	22.8053	3.90151	FALSE	FALSE
ENSG00000141349	G6PC3	31.5787	3.90129	FALSE	FALSE
ENSG00000104341	LAPTM4B	13.9835	3.89981	FALSE	FALSE
ENSG00000136758	YME1L1	7.74868	3.89716	FALSE	TRUE
ENSG00000167900	TK1	12.0284	3.89642	FALSE	FALSE
ENSG00000196642	RABL6	14.0665	3.89564	FALSE	FALSE
ENSG00000160932	LY6E	36.668	3.89526	FALSE	FALSE
ENSG00000131116	ZNF428	44.9495	3.89415	FALSE	FALSE
ENSG00000077312	SNRPA	29.1799	3.89389	FALSE	FALSE
ENSG00000102316	MAGED2	10.0118	3.89362	FALSE	FALSE
ENSG00000185787	MORF4L1	4.73782	3.89184	FALSE	FALSE
ENSG00000122140	MRPS2	18.5953	3.88862	FALSE	TRUE
ENSG00000123975	CKS2	6.61887	3.88528	FALSE	FALSE
ENSG00000124570	SERPINB6	29.8242	3.88304	FALSE	FALSE
ENSG00000142871	CYR61	4.32948	3.88288	FALSE	FALSE
ENSG00000104964	AES	16.0821	3.8827	FALSE	FALSE
ENSG00000161016	RPL8	400	3.88239	FALSE	FALSE
ENSG00000113732	ATP6V0E1	7.00045	3.88197	FALSE	FALSE
ENSG00000142541	RPL13A	16.8132	3.88142	FALSE	FALSE
ENSG00000180354	C7orf41	4.49797	3.88047	FALSE	FALSE
ENSG00000108298	RPL19	80.1204	3.8803	FALSE	FALSE
ENSG00000070756	PABPC1	25.3675	3.87886	FALSE	FALSE
ENSG00000120885	CLU	28.1087	3.87824	FALSE	FALSE
ENSG00000174748	RPL15	48.2752	3.87733	FALSE	FALSE
ENSG00000269293	ZSCAN16-AS1	4.23678	3.87563	FALSE	FALSE
ENSG00000166173	LARP6	3.83801	3.87563	FALSE	FALSE
ENSG00000130204	TOMM40	36.8347	3.87403	FALSE	TRUE
ENSG00000182481	KPNA2	38.4713	3.87271	FALSE	FALSE
ENSG00000160201	U2AF1	12.0465	3.86928	FALSE	FALSE
ENSG00000155660	PDIA4	12.5099	3.86892	FALSE	FALSE
ENSG00000179364	PACS2	3.30063	3.8683	FALSE	FALSE
ENSG00000114956	DGUOK	9.09278	3.8683	FALSE	TRUE
ENSG00000104870	FCGRT	20.8072	3.86773	FALSE	FALSE
ENSG00000101997	CCDC22	10.7415	3.86769	FALSE	FALSE
ENSG00000243989	ABHD14A-ACY1	6.34221	3.86738	FALSE	FALSE
ENSG00000143256	PFDN2	6.34221	3.86738	FALSE	FALSE
ENSG00000198736	MSRB1	4.3401	3.86646	FALSE	FALSE
lncRNA|lnc-EVX2-8	AC016739.2	3.17513	3.86461	FALSE	FALSE
ENSG00000176393	RNPEP	10.8794	3.86461	FALSE	FALSE
ENSG00000105355	PLIN3	3.17513	3.86461	FALSE	FALSE
ENSG00000099875	MKNK2	3.17513	3.86461	FALSE	FALSE
ENSG00000168077	SCARA3	3.02874	3.86461	FALSE	FALSE
ENSG00000168394	TAP1	3.02874	3.86461	FALSE	FALSE
ENSG00000261409	RP6-24A23.7	4.32948	3.86461	FALSE	FALSE
ENSG00000117748	RPA2	8.9225	3.86369	FALSE	FALSE
ENSG00000130724	CHMP2A	11.7588	3.86311	FALSE	FALSE
ENSG00000120333	MRPS14	10.5897	3.86214	FALSE	TRUE
ENSG00000161847	RAVER1	4.98353	3.85842	FALSE	FALSE
ENSG00000084623	EIF3I	17.1723	3.85418	FALSE	FALSE
ENSG00000143774	GUK1	24.1036	3.85356	FALSE	TRUE
ENSG00000104946	TBC1D17	3.85704	3.85343	FALSE	FALSE
ENSG00000130768	SMPDL3B	3.29644	3.85343	FALSE	FALSE
ENSG00000204843	DCTN1	4.00388	3.85343	FALSE	FALSE
ENSG00000160867	FGFR4	3.29644	3.85343	FALSE	FALSE
ENSG00000105974	CAV1	5.27369	3.85343	FALSE	FALSE
ENSG00000073111	MCM2	9.38096	3.85092	FALSE	FALSE
ENSG00000228300	C19orf24	15.6434	3.85061	FALSE	FALSE
ENSG00000123395	C12orf44	7.00045	3.85061	FALSE	FALSE
ENSG00000144567	FAM134A	4.07559	3.8484	FALSE	FALSE
ENSG00000131844	MCCC2	4.15259	3.8475	FALSE	TRUE
ENSG00000204267	TAP2	6.36132	3.84588	FALSE	FALSE
ENSG00000149289	ZC3H12C	4.38638	3.84588	FALSE	FALSE
ENSG00000241553	ARPC4	8.33351	3.84445	FALSE	FALSE
ENSG00000066322	ELOVL1	14.9923	3.84436	FALSE	FALSE
ENSG00000135778	NTPCR	8.36345	3.84334	FALSE	FALSE
ENSG00000187840	EIF4EBP1	14.647	3.84228	FALSE	FALSE
ENSG00000160194	NDUFV3	32.8436	3.84226	FALSE	TRUE
ENSG00000169696	ASPSCR1	4.89432	3.84207	FALSE	FALSE
ENSG00000105701	FKBP8	24.8805	3.84204	FALSE	TRUE
ENSG00000166902	MRPL16	8.39924	3.84054	FALSE	TRUE
ENSG00000131236	CAP1	7.27207	3.83872	FALSE	FALSE
ENSG00000163866	SMIM12	4.39225	3.83632	FALSE	FALSE
ENSG00000204632	HLA-G	5.48737	3.83632	FALSE	FALSE
ENSG00000172922	RNASEH2C	4.2466	3.83632	FALSE	FALSE
ENSG00000179218	CALR	63.4195	3.83631	FALSE	FALSE
ENSG00000143321	HDGF	27.5819	3.83552	FALSE	FALSE
ENSG00000171148	TADA3	4.13713	3.8344	FALSE	FALSE
ENSG00000106244	PDAP1	12.5248	3.8341	FALSE	FALSE
lncRNA|lnc-TARBP1-6	lnc-TARBP1-6	6.54847	3.83311	FALSE	FALSE
ENSG00000149480	MTA2	8.56165	3.83182	FALSE	FALSE
ENSG00000074201	CLNS1A	4.33786	3.83053	FALSE	FALSE
ENSG00000130734	ATG4D	8.28991	3.82967	FALSE	FALSE
ENSG00000134590	FAM127A	8.15798	3.82898	FALSE	FALSE
ENSG00000224877	C17orf89	32.8166	3.82699	FALSE	TRUE
ENSG00000100243	CYB5R3	38.6521	3.82554	FALSE	TRUE
ENSG00000006625	GGCT	7.54477	3.82469	FALSE	FALSE
ENSG00000073670	ADAM11	4.04705	3.82273	FALSE	FALSE
ENSG00000070961	ATP2B1	3.85704	3.82273	FALSE	FALSE
ENSG00000164828	SUN1	3.29644	3.82273	FALSE	FALSE
ENSG00000090273	NUDC	29.6078	3.82116	FALSE	FALSE
ENSG00000100162	CENPM	45.7936	3.81973	FALSE	FALSE
ENSG00000160410	SHKBP1	10.2017	3.8188	FALSE	FALSE
ENSG00000100902	PSMA6	14.8084	3.81781	FALSE	TRUE
ENSG00000132581	SDF2	6.19273	3.81534	FALSE	FALSE
ENSG00000068120	COASY	9.38096	3.81485	FALSE	TRUE
ENSG00000058804	NDC1	3.17513	3.81485	FALSE	FALSE
ENSG00000159363	ATP13A2	6.6763	3.8122	FALSE	FALSE
ENSG00000104973	MED25	7.4711	3.8122	FALSE	FALSE
ENSG00000161980	POLR3K	19.7581	3.81101	FALSE	FALSE
ENSG00000129932	DOHH	6.41058	3.81021	FALSE	FALSE
ENSG00000034713	GABARAPL2	3.93584	3.80888	FALSE	FALSE
ENSG00000182118	FAM89A	4.11144	3.80888	FALSE	FALSE
ENSG00000141736	ERBB2	3.93584	3.80888	FALSE	FALSE
ENSG00000063854	HAGH	12.8814	3.80875	FALSE	TRUE
ENSG00000162430	SEPN1	15.9751	3.80735	FALSE	FALSE
ENSG00000221821	C6orf226	3.57472	3.80688	FALSE	FALSE
ENSG00000135945	REV1	5.55637	3.80688	FALSE	FALSE
ENSG00000060491	OGFR	3.83801	3.80688	FALSE	FALSE
ENSG00000145194	ECE2	3.02874	3.80688	FALSE	FALSE
ENSG00000116199	FAM20B	4.38638	3.80688	FALSE	FALSE
ENSG00000130726	TRIM28	400	3.80553	FALSE	FALSE
ENSG00000197157	SND1	21.5074	3.8053	FALSE	TRUE
ENSG00000104979	C19orf53	28.1047	3.80482	FALSE	FALSE
ENSG00000248235	AC037459.4	8.33351	3.80437	FALSE	FALSE
ENSG00000170906	NDUFA3	7.47926	3.80241	FALSE	TRUE
ENSG00000177731	FLII	13.8795	3.80151	FALSE	FALSE
ENSG00000196235	SUPT5H	12.3677	3.80151	FALSE	FALSE
ENSG00000105341	ATP5SL	8.63021	3.80124	FALSE	TRUE
ENSG00000107175	CREB3	3.56628	3.80084	FALSE	FALSE
ENSG00000158019	BRE	4.13713	3.80084	FALSE	FALSE
ENSG00000012660	ELOVL5	5.521	3.80084	FALSE	FALSE
ENSG00000141030	COPS3	8.33029	3.80084	FALSE	FALSE
ENSG00000130311	DDA1	8.02827	3.80084	FALSE	FALSE
ENSG00000157593	SLC35B2	24.6805	3.8001	FALSE	FALSE
ENSG00000213442	RPL18AP3	3.76326	3.79983	FALSE	FALSE
ENSG00000063438	AHRR	3.89685	3.79983	FALSE	FALSE
ENSG00000174444	RPL4	32.5446	3.797	FALSE	FALSE
ENSG00000179632	MAF1	10.2058	3.79679	FALSE	FALSE
ENSG00000174915	PTDSS2	5.82379	3.79611	FALSE	FALSE
ENSG00000120071	KANSL1	3.8963	3.79611	FALSE	FALSE
ENSG00000100462	PRMT5	12.817	3.79602	FALSE	FALSE
ENSG00000105048	TNNT1	4.07559	3.79066	FALSE	FALSE
ENSG00000105696	TMEM59L	3.29644	3.79066	FALSE	FALSE
ENSG00000129103	SUMF2	33.2049	3.78934	FALSE	FALSE
ENSG00000183624	HMCES	4.13389	3.7893	FALSE	FALSE
ENSG00000122359	ANXA11	21.9335	3.78872	FALSE	FALSE
ENSG00000143553	SNAPIN	5.81753	3.78861	FALSE	FALSE
ENSG00000115241	PPM1G	21.6501	3.78861	FALSE	FALSE
ENSG00000100417	PMM1	9.38096	3.78655	FALSE	FALSE
ENSG00000131558	EXOC4	5.77893	3.78655	FALSE	FALSE
ENSG00000226950	DANCR	10.0118	3.78655	FALSE	FALSE
ENSG00000232112	TMA7	6.36132	3.78655	FALSE	FALSE
ENSG00000167302	ENTHD2	3.30063	3.78655	FALSE	FALSE
ENSG00000089053	ANAPC5	6.56138	3.78573	FALSE	FALSE
ENSG00000254772	EEF1G	52.6245	3.78484	FALSE	FALSE
ENSG00000116133	DHCR24	17.3131	3.78394	FALSE	TRUE
ENSG00000122873	CISD1	8.33351	3.78346	FALSE	TRUE
ENSG00000169230	PRELID1	13.923	3.78304	FALSE	TRUE
MI0022665	hsa-mir-6820	32.5024	3.78167	FALSE	FALSE
ENSG00000164032	H2AFZ	45.5813	3.7808	FALSE	FALSE
ENSG00000154723	ATP5J	14.7321	3.78058	FALSE	TRUE
ENSG00000100445	SDR39U1	5.521	3.7793	FALSE	TRUE
ENSG00000103769	RAB11A	13.0495	3.77501	FALSE	FALSE
ENSG00000103495	MAZ	37.3797	3.77438	FALSE	FALSE
ENSG00000169223	LMAN2	15.6434	3.77418	FALSE	FALSE
ENSG00000260272	ATP6V0C	14.2978	3.77216	FALSE	FALSE
ENSG00000123143	PKN1	10.3865	3.77148	FALSE	FALSE
ENSG00000121413	ZSCAN18	3.67287	3.76988	FALSE	FALSE
ENSG00000131748	STARD3	6.34221	3.76988	FALSE	FALSE
ENSG00000175334	BANF1	7.54477	3.76988	FALSE	FALSE
ENSG00000106330	MOSPD3	3.83801	3.76988	FALSE	FALSE
ENSG00000102054	RBBP7	41.4264	3.76956	FALSE	FALSE
ENSG00000178057	NDUFAF3	20.7173	3.76894	FALSE	TRUE
ENSG00000124614	RPS10	20.6366	3.76847	FALSE	FALSE
ENSG00000131795	RBM8A	6.63127	3.76776	FALSE	FALSE
ENSG00000175193	PARL	6.94302	3.76776	FALSE	TRUE
ENSG00000167969	ECI1	15.4557	3.76443	FALSE	TRUE
ENSG00000014216	CAPN1	9.06786	3.76405	FALSE	FALSE
ENSG00000025772	TOMM34	8.86138	3.76395	FALSE	TRUE
ENSG00000174684	B3GNT1	9.45166	3.76224	FALSE	FALSE
ENSG00000174886	AC024592.12	23.8864	3.762	FALSE	TRUE
ENSG00000204394	VARS	18.6885	3.76192	FALSE	FALSE
ENSG00000124160	NCOA5	4.49129	3.76139	FALSE	FALSE
ENSG00000146950	SHROOM2	3.02461	3.76139	FALSE	FALSE
ENSG00000163870	TPRA1	8.56165	3.76139	FALSE	FALSE
ENSG00000181409	AATK	4.49129	3.76139	FALSE	FALSE
ENSG00000177830	CHID1	14.1356	3.76059	FALSE	FALSE
ENSG00000071127	WDR1	3.58185	3.76032	FALSE	FALSE
ENSG00000135617	PRADC1	4.32895	3.75996	FALSE	FALSE
ENSG00000177380	PPFIA3	4.07559	3.75996	FALSE	FALSE
lncRNA|LRRC75A-AS1	LRRC75A-AS1	13.4383	3.75854	FALSE	FALSE
ENSG00000120913	PDLIM2	3.75335	3.75833	FALSE	FALSE
ENSG00000115541	HSPE1	25.1916	3.75741	FALSE	TRUE
ENSG00000204628	GNB2L1	400	3.75722	FALSE	FALSE
ENSG00000079785	DDX1	6.12284	3.75711	FALSE	FALSE
ENSG00000119383	PPP2R4	7.01893	3.75711	FALSE	FALSE
ENSG00000147400	CETN2	3.29644	3.75711	FALSE	FALSE
ENSG00000119487	MAPKAP1	4.75029	3.75711	FALSE	FALSE
ENSG00000196312	lnc-MFSD14C-1	5.521	3.75711	FALSE	FALSE
ENSG00000111906	HDDC2	8.09317	3.75639	FALSE	FALSE
ENSG00000159692	CTBP1	7.08541	3.75582	FALSE	FALSE
ENSG00000114942	EEF1B2	22.0475	3.75446	FALSE	FALSE
ENSG00000103202	NME4	15.6876	3.7543	FALSE	TRUE
ENSG00000171298	GAA	19.8119	3.75373	FALSE	FALSE
ENSG00000126088	UROD	12.3933	3.75136	FALSE	FALSE
ENSG00000025770	NCAPH2	5.35892	3.75064	FALSE	FALSE
ENSG00000160752	FDPS	24.9725	3.74955	FALSE	TRUE
ENSG00000132589	FLOT2	7.80678	3.74738	FALSE	FALSE
ENSG00000125970	RALY	6.41058	3.74557	FALSE	FALSE
ENSG00000162076	FLYWCH2	3.7551	3.74411	FALSE	FALSE
ENSG00000160213	CSTB	8.86329	3.74265	FALSE	FALSE
ENSG00000160783	PMF1	4.92902	3.74265	FALSE	FALSE
ENSG00000142798	HSPG2	4.92902	3.74265	FALSE	FALSE
ENSG00000079739	PGM1	5.14752	3.74192	FALSE	FALSE
ENSG00000005882	PDK2	5.88237	3.74119	FALSE	TRUE
ENSG00000159210	SNF8	22.9659	3.74	FALSE	FALSE
ENSG00000117362	APH1A	15.1594	3.73973	FALSE	FALSE
ENSG00000138107	ACTR1A	9.72372	3.73973	FALSE	FALSE
ENSG00000142655	PEX14	4.15259	3.7391	FALSE	FALSE
ENSG00000103275	UBE2I	18.8059	3.7374	FALSE	FALSE
ENSG00000084072	PPIE	12.1773	3.73494	FALSE	FALSE
ENSG00000227057	WDR46	10.3559	3.73384	FALSE	FALSE
ENSG00000105486	LIG1	5.77893	3.7331	FALSE	FALSE
ENSG00000111684	LPCAT3	4.49129	3.7331	FALSE	FALSE
ENSG00000070669	ASNS	5.54508	3.7331	FALSE	FALSE
ENSG00000135931	ARMC9	3.17513	3.7331	FALSE	FALSE
ENSG00000063660	GPC1	3.67287	3.73087	FALSE	FALSE
ENSG00000115211	EIF2B4	3.67287	3.73087	FALSE	FALSE
ENSG00000258539	RP11-12J10.3	3.67287	3.73087	FALSE	FALSE
ENSG00000159176	CSRP1	3.71815	3.73087	FALSE	FALSE
ENSG00000263327	TAPT1-AS1	3.41176	3.72864	FALSE	FALSE
ENSG00000112699	GMDS	3.56628	3.72864	FALSE	FALSE
ENSG00000257923	CUX1	3.93584	3.72864	FALSE	FALSE
ENSG00000108829	LRRC59	32.3651	3.7283	FALSE	FALSE
ENSG00000184900	SUMO3	4.07559	3.7279	FALSE	FALSE
ENSG00000088826	SMOX	4.23678	3.7279	FALSE	FALSE
ENSG00000175482	POLD4	3.30063	3.72641	FALSE	FALSE
ENSG00000100372	SLC25A17	5.21884	3.72641	FALSE	TRUE
ENSG00000130203	APOE	5.21884	3.72641	FALSE	FALSE
ENSG00000175634	RPS6KB2	6.72997	3.72585	FALSE	FALSE
ENSG00000151353	TMEM18	8.00935	3.72379	FALSE	FALSE
ENSG00000107438	PDLIM1	21.3596	3.72256	FALSE	FALSE
ENSG00000101457	DNTTIP1	13.1974	3.72256	FALSE	FALSE
ENSG00000204438	GPANK1	3.85704	3.72191	FALSE	FALSE
ENSG00000184489	PTP4A3	3.85704	3.72191	FALSE	FALSE
ENSG00000160075	SSU72	8.83409	3.72191	FALSE	FALSE
ENSG00000144589	STK11IP	4.04705	3.72191	FALSE	FALSE
ENSG00000102900	NUP93	3.85704	3.72191	FALSE	FALSE
ENSG00000006118	TMEM132A	7.67533	3.72191	FALSE	FALSE
ENSG00000103485	QPRT	4.04705	3.72191	FALSE	FALSE
ENSG00000178467	P4HTM	7.94302	3.72101	FALSE	FALSE
ENSG00000125652	ALKBH7	13.091	3.7205	FALSE	TRUE
ENSG00000163399	ATP1A1	51.1087	3.71956	FALSE	FALSE
ENSG00000229117	RPL41	25.948	3.71918	FALSE	FALSE
ENSG00000161618	ALDH16A1	10.7584	3.71865	FALSE	FALSE
ENSG00000124207	CSE1L	9.50855	3.71739	FALSE	FALSE
ENSG00000149257	SERPINH1	6.10546	3.71466	FALSE	FALSE
ENSG00000196655	TRAPPC4	5.77893	3.71436	FALSE	FALSE
ENSG00000125901	MRPS26	26.1517	3.71399	FALSE	TRUE
ENSG00000117308	GALE	9.47932	3.71132	FALSE	FALSE
ENSG00000166710	B2M	10.1177	3.71055	FALSE	FALSE
ENSG00000137207	YIPF3	8.16851	3.71055	FALSE	FALSE
ENSG00000162194	C11orf48	3.7551	3.71055	FALSE	FALSE
ENSG00000160014	CALM3	25.7521	3.70905	FALSE	FALSE
ENSG00000167515	TRAPPC2L	14.165	3.70875	FALSE	FALSE
ENSG00000225663	FAM195B	7.97807	3.70791	FALSE	FALSE
ENSG00000126247	CAPNS1	8.73945	3.7073	FALSE	FALSE
ENSG00000168003	SLC3A2	8.13529	3.70673	FALSE	FALSE
ENSG00000102882	MAPK3	13.3582	3.70523	FALSE	FALSE
ENSG00000117133	RPF1	5.54508	3.70481	FALSE	FALSE
ENSG00000110711	AIP	14.7752	3.70464	FALSE	FALSE
ENSG00000182718	ANXA2	28.1047	3.70463	FALSE	FALSE
ENSG00000185627	PSMD13	17.8615	3.70452	FALSE	FALSE
ENSG00000112655	PTK7	14.3442	3.70407	FALSE	FALSE
ENSG00000125821	DTD1	3.02461	3.70365	FALSE	FALSE
ENSG00000185000	DGAT1	6.32358	3.70365	FALSE	FALSE
ENSG00000165912	PACSIN3	5.27369	3.70365	FALSE	FALSE
ENSG00000148290	SURF1	9.14943	3.70365	FALSE	TRUE
ENSG00000241343	RPL36A-HNRNPH2	12.5948	3.70116	FALSE	FALSE
ENSG00000172053	QARS	14.0665	3.70067	FALSE	FALSE
ENSG00000241360	PDXP	16.6029	3.69865	FALSE	FALSE
lncRNA|lnc-RNASET2-1	lnc-RNASET2-1	7.08541	3.69808	FALSE	FALSE
ENSG00000116649	SRM	34.5709	3.69803	FALSE	FALSE
ENSG00000141556	TBCD	3.30063	3.69434	FALSE	FALSE
ENSG00000214253	FIS1	21.3316	3.69249	FALSE	TRUE
ENSG00000163541	SUCLG1	10.7505	3.69247	FALSE	TRUE
ENSG00000105568	PPP2R1A	64.816	3.69058	FALSE	FALSE
ENSG00000132182	NUP210	10.7415	3.69023	FALSE	FALSE
ENSG00000103260	METRN	5.55637	3.68964	FALSE	FALSE
ENSG00000115828	QPCT	3.67287	3.68964	FALSE	FALSE
ENSG00000137411	VARS2	8.29321	3.68964	FALSE	TRUE
ENSG00000142227	EMP3	16.0532	3.68786	FALSE	FALSE
ENSG00000079246	XRCC5	27.2454	3.68762	FALSE	FALSE
ENSG00000164880	INTS1	12.3116	3.686	FALSE	FALSE
ENSG00000138617	PARP16	3.15271	3.68491	FALSE	FALSE
ENSG00000090372	STRN4	10.9828	3.68491	FALSE	FALSE
ENSG00000186350	RXRA	3.93584	3.68491	FALSE	FALSE
ENSG00000198805	PNP	11.5299	3.68396	FALSE	FALSE
ENSG00000143162	CREG1	7.17316	3.68134	FALSE	FALSE
ENSG00000137161	CNPY3	25.1061	3.68039	FALSE	FALSE
ENSG00000117632	STMN1	16.9597	3.67947	FALSE	FALSE
ENSG00000112578	BYSL	8.8636	3.67776	FALSE	FALSE
ENSG00000105197	TIMM50	15.5145	3.67728	FALSE	TRUE
ENSG00000104852	SNRNP70	17.8648	3.67685	FALSE	FALSE
ENSG00000196576	PLXNB2	9.39674	3.67536	FALSE	FALSE
lncRNA|PPP1R26-AS1	PPP1R26-AS1	3.7551	3.67536	FALSE	FALSE
ENSG00000244313	lnc-CHRM4-2	4.38638	3.67536	FALSE	FALSE
ENSG00000182544	MFSD5	3.57816	3.67536	FALSE	FALSE
ENSG00000168036	CTNNB1	13.576	3.67367	FALSE	FALSE
ENSG00000149809	TM7SF2	4.49129	3.67295	FALSE	FALSE
ENSG00000130560	UBAC1	5.21884	3.67295	FALSE	FALSE
ENSG00000204310	AGPAT1	11.1843	3.66956	FALSE	FALSE
ENSG00000114650	SCAP	7.00045	3.66932	FALSE	FALSE
ENSG00000090238	YPEL3	4.46148	3.66568	FALSE	FALSE
ENSG00000163682	RPL9	15.1594	3.66247	FALSE	FALSE
lncRNA|lnc-CCDC189-1	lnc-CCDC189-1	4.3401	3.66242	FALSE	FALSE
ENSG00000162032	SPSB3	3.13437	3.66242	FALSE	FALSE
ENSG00000169738	DCXR	28.3196	3.66156	FALSE	TRUE
ENSG00000169750	RAC3	45.5174	3.66082	FALSE	FALSE
ENSG00000136950	ARPC5L	3.97725	3.66079	FALSE	FALSE
ENSG00000177889	UBE2N	6.62483	3.66079	FALSE	FALSE
ENSG00000067057	PFKP	10.4713	3.66079	FALSE	FALSE
ENSG00000105516	DBP	3.57472	3.65915	FALSE	FALSE
ENSG00000123992	DNPEP	4.23678	3.65915	FALSE	FALSE
ENSG00000165672	PRDX3	5.66565	3.65868	FALSE	TRUE
ENSG00000250722	SEPP1	7.67996	3.6571	FALSE	FALSE
ENSG00000108107	RPL28	81.1409	3.65704	FALSE	FALSE
ENSG00000197582	GPX1P1	24.9614	3.65469	FALSE	FALSE
ENSG00000244509	APOBEC3C	11.2405	3.65332	FALSE	FALSE
ENSG00000165280	VCP	40.1771	3.65274	FALSE	FALSE
ENSG00000123989	CHPF	14.4687	3.65241	FALSE	FALSE
ENSG00000105402	NAPA	16.872	3.65182	FALSE	FALSE
ENSG00000103145	HCFC1R1	12.2704	3.65173	FALSE	FALSE
ENSG00000174231	PRPF8	28.4395	3.65129	FALSE	FALSE
ENSG00000136231	IGF2BP3	4.1123	3.6509	FALSE	FALSE
ENSG00000165233	C9orf89	6.14591	3.6509	FALSE	FALSE
ENSG00000137133	HINT2	6.41058	3.64924	FALSE	TRUE
ENSG00000139641	ESYT1	19.9423	3.64924	FALSE	FALSE
ENSG00000164713	BRI3	3.8963	3.64924	FALSE	FALSE
ENSG00000174775	HRAS	3.56628	3.64841	FALSE	FALSE
ENSG00000179344	HLA-DQB1	5.80788	3.64741	FALSE	FALSE
ENSG00000079805	DNM2	16.8397	3.64591	FALSE	FALSE
ENSG00000167920	TMEM99	5.27369	3.64591	FALSE	FALSE
ENSG00000088930	XRN2	3.15271	3.64591	FALSE	FALSE
ENSG00000115317	HTRA2	3.29644	3.64591	FALSE	TRUE
ENSG00000204592	HLA-E	7.51373	3.64591	FALSE	FALSE
ENSG00000134057	CCNB1	7.67533	3.64591	FALSE	FALSE
ENSG00000189171	S100A13	7.01893	3.64591	FALSE	FALSE
ENSG00000076201	PTPN23	4.41831	3.64591	FALSE	FALSE
ENSG00000160563	MED27	7.21069	3.64368	FALSE	FALSE
ENSG00000124374	PAIP2B	5.81753	3.64088	FALSE	FALSE
ENSG00000169733	RFNG	3.84854	3.64088	FALSE	FALSE
ENSG00000129946	SHC2	6.06022	3.64088	FALSE	FALSE
ENSG00000144021	CIAO1	9.59494	3.63836	FALSE	FALSE
ENSG00000140391	TSPAN3	21.5343	3.6366	FALSE	FALSE
ENSG00000182180	MRPS16	8.15798	3.63623	FALSE	TRUE
ENSG00000125991	ERGIC3	55.1715	3.63458	FALSE	FALSE
ENSG00000181090	EHMT1	3.40938	3.63455	FALSE	FALSE
ENSG00000149923	PPP4C	20.334	3.6343	FALSE	FALSE
ENSG00000090661	CERS4	5.77893	3.63413	FALSE	FALSE
ENSG00000001630	CYP51A1	5.02469	3.63413	FALSE	FALSE
ENSG00000177239	MAN1B1	4.3401	3.63413	FALSE	FALSE
ENSG00000134910	STT3A	8.36877	3.63264	FALSE	FALSE
ENSG00000187145	MRPS21	22.2664	3.62974	FALSE	TRUE
ENSG00000148824	RP11-108K14.8	8.47728	3.62963	FALSE	TRUE
ENSG00000213337	ANKRD39	7.90745	3.62845	FALSE	FALSE
ENSG00000171130	ATP6V0E2	11.4916	3.62688	FALSE	FALSE
ENSG00000128245	YWHAH	5.88237	3.62645	FALSE	FALSE
ENSG00000187778	MCRS1	3.71954	3.62559	FALSE	FALSE
ENSG00000115350	POLE4	3.53053	3.62559	FALSE	FALSE
ENSG00000123384	LRP1	3.4644	3.62559	FALSE	FALSE
ENSG00000174460	ZCCHC12	4.20052	3.62559	FALSE	FALSE
ENSG00000197879	MYO1C	3.16912	3.62559	FALSE	FALSE
ENSG00000166278	C2	3.4644	3.62559	FALSE	FALSE
ENSG00000101019	UQCC1	4.20052	3.62559	FALSE	TRUE
ENSG00000100142	POLR2F	41.801	3.62417	FALSE	FALSE
ENSG00000177156	TALDO1	17.2202	3.62249	FALSE	FALSE
ENSG00000067560	RHOA	14.4633	3.61989	FALSE	FALSE
ENSG00000166226	CCT2	26.5119	3.61948	FALSE	FALSE
ENSG00000172590	MRPL52	7.81849	3.61912	FALSE	TRUE
ENSG00000137312	FLOT1	17.4806	3.61664	FALSE	FALSE
ENSG00000270800	RPS10-NUDT3	23.3377	3.6166	FALSE	FALSE
ENSG00000175203	DCTN2	28.7429	3.61548	FALSE	FALSE
ENSG00000187024	PTRH1	4.41831	3.61521	FALSE	TRUE
ENSG00000205542	TMSB4X	5.21884	3.61521	FALSE	FALSE
ENSG00000181029	TRAPPC5	11.6879	3.61521	FALSE	FALSE
ENSG00000130707	ASS1	4.49797	3.61521	FALSE	FALSE
ENSG00000179820	MYADM	4.11144	3.6139	FALSE	FALSE
ENSG00000135677	GNS	15.6876	3.61334	FALSE	FALSE
ENSG00000159840	ZYX	8.8636	3.61312	FALSE	FALSE
ENSG00000014641	MDH1	9.7588	3.61259	FALSE	TRUE
ENSG00000177030	DEAF1	4.73444	3.61259	FALSE	FALSE
ENSG00000111328	CDK2AP1	7.88466	3.61259	FALSE	FALSE
ENSG00000112651	MRPL2	5.02469	3.61259	FALSE	TRUE
ENSG00000204822	MRPL53	25.3151	3.61158	FALSE	TRUE
ENSG00000103502	CDIPT	4.15259	3.61147	FALSE	FALSE
ENSG00000139428	MMAB	6.41058	3.60953	FALSE	TRUE
ENSG00000214063	TSPAN4	8.33351	3.60821	FALSE	FALSE
ENSG00000143537	ADAM15	8.83409	3.60821	FALSE	FALSE
ENSG00000167986	DDB1	19.6078	3.60819	FALSE	FALSE
ENSG00000144028	SNRNP200	53.9863	3.60733	FALSE	FALSE
ENSG00000105698	USF2	12.1773	3.60512	FALSE	FALSE
ENSG00000143977	SNRPG	3.15271	3.60468	FALSE	FALSE
ENSG00000172716	SLFN11	3.56628	3.60468	FALSE	FALSE
ENSG00000011105	TSPAN9	3.41176	3.60468	FALSE	FALSE
lncRNA|MAPT-IT1	KANSL1-AS1	3.29644	3.60468	FALSE	FALSE
ENSG00000067704	IARS2	14.7683	3.60453	FALSE	TRUE
ENSG00000213058	RP4-765C7.2	26.9399	3.60167	FALSE	FALSE
ENSG00000105771	SMG9	5.82379	3.60114	FALSE	FALSE
ENSG00000127884	ECHS1	10.1985	3.60114	FALSE	TRUE
ENSG00000146555	SDK1	5.88237	3.60114	FALSE	FALSE
ENSG00000175183	CSRP2	7.02363	3.59936	FALSE	FALSE
ENSG00000174672	BRSK2	3.67287	3.59936	FALSE	FALSE
ENSG00000136490	LIMD2	11.8657	3.59713	FALSE	FALSE
ENSG00000106397	PLOD3	15.8007	3.59579	FALSE	FALSE
ENSG00000106588	PSMA2	5.21884	3.59489	FALSE	FALSE
ENSG00000104774	MAN2B1	16.2005	3.59346	FALSE	FALSE
ENSG00000182196	ARL6IP4	51.6681	3.59199	FALSE	FALSE
ENSG00000172992	DCAKD	6.90802	3.59076	FALSE	TRUE
ENSG00000141562	NARF	9.70215	3.5904	FALSE	FALSE
ENSG00000272896	RP11-216L13.17	3.85704	3.5904	FALSE	FALSE
ENSG00000124762	CDKN1A	5.98974	3.5904	FALSE	FALSE
ENSG00000132153	DHX30	17.4806	3.59002	FALSE	TRUE
ENSG00000106803	SEC61B	19.7675	3.58916	FALSE	FALSE
ENSG00000204673	AKT1S1	13.7791	3.58859	FALSE	FALSE
ENSG00000125734	GPR108	10.95	3.58859	FALSE	FALSE
ENSG00000169020	ATP5I	45.0299	3.58635	FALSE	TRUE
ENSG00000115561	CHMP3	9.66782	3.58315	FALSE	FALSE
ENSG00000185088	RPS27L	7.00045	3.58178	FALSE	FALSE
ENSG00000136270	TBRG4	16.73	3.58062	FALSE	TRUE
ENSG00000153048	CARHSP1	12.9739	3.57845	FALSE	FALSE
ENSG00000130294	KIF1A	10.1005	3.57821	FALSE	FALSE
ENSG00000185624	P4HB	32.5233	3.57796	FALSE	TRUE
ENSG00000179262	RAD23A	23.7915	3.5774	FALSE	FALSE
ENSG00000081870	HSPB11	6.63127	3.57705	FALSE	FALSE
ENSG00000112473	SLC39A7	9.38077	3.57582	FALSE	FALSE
ENSG00000248098	CTC-435M10.3	8.36345	3.57582	FALSE	TRUE
ENSG00000068383	INPP5A	4.13713	3.57398	FALSE	FALSE
ENSG00000205903	ZNF316	4.32895	3.57398	FALSE	FALSE
ENSG00000249590	RP4-539M6.19	17.2736	3.57372	FALSE	TRUE
ENSG00000099817	POLR2E	35.5277	3.57302	FALSE	FALSE
ENSG00000089685	BIRC5	10.4534	3.57287	FALSE	FALSE
ENSG00000167658	EEF2	76.9917	3.5724	FALSE	FALSE
ENSG00000135148	TRAFD1	5.81753	3.57213	FALSE	FALSE
ENSG00000149357	LAMTOR1	9.70215	3.57213	FALSE	FALSE
ENSG00000203950	FAM127B	11.3143	3.57213	FALSE	FALSE
ENSG00000169710	FASN	66.4054	3.57162	FALSE	TRUE
ENSG00000205629	LCMT1	8.33351	3.57121	FALSE	FALSE
ENSG00000214078	CPNE1	10.5825	3.57109	FALSE	FALSE
ENSG00000141295	SCRN2	9.32339	3.57108	FALSE	FALSE
ENSG00000109606	DHX15	3.42364	3.56991	FALSE	FALSE
ENSG00000119559	C19orf25	3.71815	3.56991	FALSE	FALSE
ENSG00000120509	PDZD11	7.93802	3.56694	FALSE	FALSE
ENSG00000239779	WBP1	7.70781	3.56656	FALSE	FALSE
ENSG00000130309	COLGALT1	14.15	3.56576	FALSE	FALSE
ENSG00000072310	SREBF1	16.4291	3.56544	FALSE	FALSE
lncRNA|LINC01578	AC013394.2	6.87167	3.56544	FALSE	FALSE
ENSG00000105171	POP4	6.2323	3.56488	FALSE	FALSE
ENSG00000104886	PLEKHJ1	16.4076	3.56488	FALSE	FALSE
ENSG00000134308	YWHAQ	17.3825	3.56336	FALSE	FALSE
ENSG00000161011	SQSTM1	9.47457	3.56283	FALSE	FALSE
ENSG00000148334	PTGES2	9.22716	3.56283	FALSE	TRUE
ENSG00000139644	TMBIM6	5.87818	3.56283	FALSE	FALSE
ENSG00000101146	RAE1	8.02337	3.56236	FALSE	FALSE
ENSG00000160741	CRTC2	3.29644	3.56095	FALSE	FALSE
ENSG00000105248	CCDC94	3.29644	3.56095	FALSE	FALSE
ENSG00000142186	SCYL1	6.6763	3.56095	FALSE	FALSE
ENSG00000167671	UBXN6	9.65898	3.56095	FALSE	FALSE
ENSG00000100083	GGA1	8.59193	3.56064	FALSE	FALSE
ENSG00000181789	COPG1	6.24997	3.56024	FALSE	FALSE
ENSG00000169689	STRA13	21.1215	3.56005	FALSE	FALSE
ENSG00000100258	LMF2	12.1409	3.55982	FALSE	FALSE
ENSG00000127663	KDM4B	3.02874	3.55813	FALSE	FALSE
ENSG00000186577	C6orf1	3.41176	3.55813	FALSE	FALSE
lncRNA|lnc-CHTF18-1	lnc-CHTF18-1	8.8636	3.55444	FALSE	FALSE
ENSG00000135506	OS9	27.8278	3.55399	FALSE	FALSE
ENSG00000137834	SMAD6	7.17316	3.55245	FALSE	FALSE
ENSG00000130985	UBA1	32.2998	3.55224	FALSE	FALSE
ENSG00000160226	C21orf2	3.10893	3.55122	FALSE	FALSE
ENSG00000198911	SREBF2	7.84579	3.55122	FALSE	FALSE
ENSG00000163466	ARPC2	14.2978	3.55081	FALSE	FALSE
lncRNA|SNHG7	SNHG7	12.0975	3.55037	FALSE	FALSE
ENSG00000100528	CNIH1	5.49844	3.54959	FALSE	FALSE
ENSG00000167693	NXN	3.97725	3.54959	FALSE	FALSE
ENSG00000248487	ABHD14A	3.4644	3.54959	FALSE	FALSE
lncRNA|lnc-AGAP1-1	lnc-AGAP1-1	3.97725	3.54959	FALSE	FALSE
ENSG00000066044	ELAVL1	3.82413	3.54959	FALSE	FALSE
ENSG00000141564	RPTOR	3.4644	3.54959	FALSE	FALSE
ENSG00000187051	RPS19BP1	22.2578	3.54806	FALSE	FALSE
ENSG00000137285	TUBB2B	15.3871	3.54638	FALSE	FALSE
ENSG00000111665	CDCA3	5.42518	3.54615	FALSE	FALSE
MI0015975	hsa-mir-1244-3	14.8759	3.54476	FALSE	FALSE
ENSG00000244274	DBNDD2	3.16912	3.54384	FALSE	FALSE
ENSG00000115275	MOGS	9.09278	3.54355	FALSE	FALSE
ENSG00000186010	CTC-260F20.3	32.5233	3.54308	FALSE	TRUE
ENSG00000072110	ACTN1	9.78805	3.54269	FALSE	FALSE
ENSG00000173801	JUP	13.9261	3.54018	FALSE	FALSE
ENSG00000166411	IDH3A	4.08238	3.53921	FALSE	TRUE
ENSG00000146109	ABT1	10.2504	3.53921	FALSE	FALSE
ENSG00000049656	CLPTM1L	10.6685	3.53805	FALSE	FALSE
ENSG00000180198	RCC1	10.1734	3.53805	FALSE	FALSE
ENSG00000143761	ARF1	8.80385	3.53805	FALSE	FALSE
ENSG00000182934	SRPR	10.6595	3.53649	FALSE	FALSE
ENSG00000108883	EFTUD2	8.5261	3.53513	FALSE	FALSE
ENSG00000105854	PON2	3.17513	3.53513	FALSE	FALSE
ENSG00000167118	URM1	6.44509	3.53338	FALSE	FALSE
ENSG00000148450	MSRB2	8.9225	3.53221	FALSE	TRUE
ENSG00000001036	FUCA2	5.21884	3.53025	FALSE	FALSE
ENSG00000148400	NOTCH1	5.21884	3.53025	FALSE	FALSE
ENSG00000149136	SSRP1	20.865	3.53022	FALSE	FALSE
ENSG00000161981	SNRNP25	16.712	3.52984	FALSE	FALSE
ENSG00000131165	CHMP1A	6.09213	3.52894	FALSE	FALSE
ENSG00000108639	SYNGR2	21.8974	3.52857	FALSE	FALSE
ENSG00000133398	MED10	7.94302	3.5275	FALSE	FALSE
ENSG00000125844	RRBP1	9.24725	3.52716	FALSE	FALSE
ENSG00000239857	GET4	14.165	3.52357	FALSE	FALSE
ENSG00000105676	ARMC6	7.51373	3.52336	FALSE	FALSE
ENSG00000151465	CDC123	13.4726	3.52336	FALSE	FALSE
ENSG00000005448	WDR54	3.67287	3.52336	FALSE	FALSE
ENSG00000242485	MRPL20	15.5635	3.52331	FALSE	TRUE
ENSG00000102265	TIMP1	31.9224	3.52176	FALSE	FALSE
ENSG00000130159	ECSIT	6.55958	3.52038	FALSE	TRUE
ENSG00000158158	CNNM4	6.6763	3.51972	FALSE	FALSE
ENSG00000106028	SSBP1	11.97	3.51939	FALSE	TRUE
ENSG00000158156	XKR8	3.89685	3.51889	FALSE	FALSE
ENSG00000171863	RPS7	16.6292	3.51823	FALSE	FALSE
ENSG00000065526	SPEN	18.5001	3.51817	FALSE	FALSE
ENSG00000143753	DEGS1	3.46383	3.5164	FALSE	FALSE
ENSG00000183283	DAZAP2	7.94302	3.51632	FALSE	FALSE
ENSG00000198791	CNOT7	3.73051	3.51525	FALSE	FALSE
ENSG00000111786	SRSF9	11.2064	3.51472	FALSE	FALSE
ENSG00000101161	PRPF6	10.6151	3.51439	FALSE	FALSE
ENSG00000167685	ZNF444	8.36345	3.51439	FALSE	FALSE
ENSG00000108270	AATF	12.0883	3.51439	FALSE	FALSE
ENSG00000180817	PPA1	6.14591	3.51439	FALSE	FALSE
ENSG00000106636	YKT6	3.15271	3.51439	FALSE	FALSE
ENSG00000114383	TUSC2	3.29644	3.51439	FALSE	FALSE
ENSG00000160767	FAM189B	8.953	3.51439	FALSE	FALSE
ENSG00000124588	NQO2	3.57472	3.51439	FALSE	FALSE
ENSG00000050820	BCAR1	4.14364	3.51439	FALSE	FALSE
ENSG00000099795	NDUFB7	74.8689	3.51427	FALSE	TRUE
lncRNA|TBX2-AS1	TBX2-AS1	5.88536	3.51311	FALSE	FALSE
ENSG00000143418	CERS2	10.1985	3.51306	FALSE	FALSE
ENSG00000143621	ILF2	6.78998	3.51199	FALSE	FALSE
ENSG00000143183	TMCO1	12.7418	3.51128	FALSE	FALSE
ENSG00000101210	EEF1A2	9.88412	3.51118	FALSE	FALSE
ENSG00000175061	C17orf76-AS1	29.6765	3.51071	FALSE	FALSE
ENSG00000124571	XPO5	3.30063	3.50836	FALSE	FALSE
ENSG00000106066	CPVL	3.41176	3.50836	FALSE	FALSE
ENSG00000128833	MYO5C	3.30063	3.50836	FALSE	FALSE
ENSG00000084774	CAD	9.38077	3.50836	FALSE	FALSE
ENSG00000197696	NMB	4.49797	3.50735	FALSE	FALSE
ENSG00000178307	TMEM11	6.10546	3.50714	FALSE	TRUE
ENSG00000134871	COL4A2	12.4546	3.50684	FALSE	FALSE
ENSG00000109762	SNX25	3.93584	3.50684	FALSE	FALSE
ENSG00000078061	ARAF	6.3332	3.50471	FALSE	FALSE
ENSG00000170860	LSM3	9.1298	3.5038	FALSE	FALSE
ENSG00000116478	HDAC1	16.0821	3.5038	FALSE	FALSE
ENSG00000176973	FAM89B	10.3005	3.5038	FALSE	FALSE
ENSG00000142156	COL6A1	11.4603	3.50357	FALSE	FALSE
ENSG00000161513	FDXR	7.70781	3.49941	FALSE	TRUE
ENSG00000133142	TCEAL4	13.4748	3.49729	FALSE	FALSE
ENSG00000127399	LRRC61	5.28997	3.49613	FALSE	FALSE
ENSG00000139579	NABP2	6.06022	3.49613	FALSE	FALSE
ENSG00000142530	FAM71E1	3.17513	3.49613	FALSE	FALSE
ENSG00000132004	FBXW9	5.28997	3.49613	FALSE	FALSE
ENSG00000111186	WNT5B	3.17513	3.49613	FALSE	FALSE
ENSG00000166582	CENPV	8.16851	3.49613	FALSE	FALSE
ENSG00000214530	STARD10	3.17513	3.49613	FALSE	FALSE
ENSG00000185187	SIGIRR	5.54508	3.49407	FALSE	FALSE
ENSG00000185803	SLC52A2	11.6685	3.49393	FALSE	FALSE
ENSG00000072062	PRKACA	10.6151	3.49348	FALSE	FALSE
ENSG00000152795	HNRNPDL	10.4848	3.49171	FALSE	FALSE
ENSG00000153574	RPIA	6.19273	3.49149	FALSE	TRUE
ENSG00000160310	PRMT2	3.17028	3.48994	FALSE	FALSE
ENSG00000115685	PPP1R7	5.27369	3.48994	FALSE	FALSE
ENSG00000204386	NEU1	8.82696	3.48717	FALSE	FALSE
ENSG00000129084	PSMA1	3.28897	3.48682	FALSE	FALSE
ENSG00000169919	GUSB	16.5441	3.48682	FALSE	FALSE
ENSG00000105401	CDC37	26.9399	3.48646	FALSE	FALSE
ENSG00000089693	MLF2	29.899	3.48618	FALSE	FALSE
ENSG00000148248	SURF4	19.3016	3.48404	FALSE	FALSE
MI0003760	hsa-mir-671	3.57816	3.48369	FALSE	FALSE
ENSG00000169180	XPO6	3.89685	3.48369	FALSE	FALSE
ENSG00000080824	HSP90AA1	18.0755	3.4835	FALSE	FALSE
ENSG00000109103	UNC119	6.36536	3.48244	FALSE	FALSE
ENSG00000081377	CDC14B	4.54604	3.48181	FALSE	FALSE
ENSG00000166562	SEC11C	4.76065	3.4816	FALSE	FALSE
ENSG00000103876	FAH	6.9019	3.4816	FALSE	FALSE
ENSG00000243317	C7orf73	6.2323	3.47992	FALSE	FALSE
ENSG00000103512	NOMO1	7.63597	3.4792	FALSE	FALSE
ENSG00000162804	SNED1	4.11144	3.47739	FALSE	FALSE
ENSG00000155463	OXA1L	10.1005	3.47739	FALSE	TRUE
ENSG00000154832	CXXC1	4.14364	3.47739	FALSE	FALSE
ENSG00000086061	DNAJA1	10.2017	3.47739	FALSE	FALSE
ENSG00000144043	TEX261	6.06022	3.47581	FALSE	FALSE
ENSG00000172893	DHCR7	13.2583	3.47575	FALSE	FALSE
ENSG00000130175	PRKCSH	20.5392	3.47528	FALSE	FALSE
ENSG00000105723	GSK3A	6.19273	3.47528	FALSE	FALSE
ENSG00000104679	R3HCC1	4.73444	3.47528	FALSE	FALSE
ENSG00000156990	RPUSD3	8.26647	3.47468	FALSE	TRUE
ENSG00000159335	PTMS	63.0829	3.47431	FALSE	FALSE
ENSG00000214160	ALG3	9.45166	3.47359	FALSE	FALSE
ENSG00000162231	NXF1	8.7757	3.47168	FALSE	FALSE
ENSG00000142192	APP	15.8952	3.46976	FALSE	FALSE
ENSG00000126522	ASL	5.09917	3.46891	FALSE	FALSE
ENSG00000148426	PROSER2	3.02874	3.46784	FALSE	FALSE
ENSG00000223802	CERS1	7.04038	3.46784	FALSE	FALSE
ENSG00000196126	HLA-DRB1	3.58185	3.46784	FALSE	FALSE
ENSG00000105011	ASF1B	11.828	3.46784	FALSE	FALSE
ENSG00000103245	NARFL	3.67287	3.46784	FALSE	FALSE
lncRNA|lnc-KCNQ4-5	lnc-KCNQ4-5	3.83801	3.46784	FALSE	FALSE
ENSG00000102858	MGRN1	9.43625	3.46708	FALSE	FALSE
ENSG00000130382	MLLT1	3.85704	3.46463	FALSE	FALSE
ENSG00000131051	RBM39	3.29644	3.46463	FALSE	FALSE
ENSG00000196498	NCOR2	3.15271	3.46463	FALSE	FALSE
ENSG00000174903	RAB1B	27.2206	3.46435	FALSE	FALSE
ENSG00000167513	CDT1	19.7581	3.46414	FALSE	FALSE
lncRNA|RPARP-AS1	RPARP-AS1	7.08541	3.46334	FALSE	FALSE
ENSG00000138073	PREB	9.01977	3.46334	FALSE	FALSE
ENSG00000230989	HSBP1	31.2691	3.46305	FALSE	FALSE
ENSG00000089351	GRAMD1A	7.21958	3.46221	FALSE	FALSE
ENSG00000112306	RPS12	85.5232	3.46059	FALSE	FALSE
ENSG00000161091	MFSD12	3.59654	3.46052	FALSE	FALSE
ENSG00000177733	HNRNPA0	9.02025	3.45847	FALSE	FALSE
ENSG00000074319	TSG101	7.02363	3.45816	FALSE	FALSE
ENSG00000135862	LAMC1	24.6805	3.45621	FALSE	TRUE
ENSG00000039560	RAI14	3.17513	3.4549	FALSE	FALSE
ENSG00000248275	TRIM52-AS1	4.13713	3.4549	FALSE	FALSE
ENSG00000166340	TPP1	9.45263	3.4549	FALSE	FALSE
ENSG00000133983	COX16	3.17513	3.4549	FALSE	TRUE
ENSG00000188846	RPL14	17.9456	3.45348	FALSE	FALSE
ENSG00000108830	RND2	4.46676	3.45327	FALSE	FALSE
ENSG00000123146	CD97	7.58338	3.45163	FALSE	FALSE
ENSG00000142230	SAE1	13.5226	3.45163	FALSE	FALSE
ENSG00000183155	RABIF	4.38638	3.45163	FALSE	FALSE
ENSG00000162910	MRPL55	13.7366	3.45116	FALSE	TRUE
ENSG00000183010	PYCR1	8.80407	3.44933	FALSE	TRUE
ENSG00000155366	RP11-426L16.10	10.3865	3.44881	FALSE	FALSE
ENSG00000215621	AC174470.1	13.6224	3.44834	FALSE	FALSE
ENSG00000113583	C5orf15	13.6706	3.44807	FALSE	FALSE
ENSG00000197785	ATAD3A	8.8998	3.44724	FALSE	TRUE
ENSG00000130202	PVRL2	11.0366	3.44724	FALSE	FALSE
ENSG00000178035	IMPDH2	5.99446	3.44724	FALSE	FALSE
ENSG00000105700	KXD1	4.34777	3.44693	FALSE	FALSE
ENSG00000165948	IFI27L1	8.36877	3.44636	FALSE	FALSE
ENSG00000143612	C1orf43	12.1409	3.4459	FALSE	FALSE
ENSG00000053371	AKR7A2	13.2178	3.44564	FALSE	TRUE
ENSG00000129625	REEP5	10.6151	3.44491	FALSE	FALSE
ENSG00000126461	SCAF1	11.4014	3.44384	FALSE	FALSE
ENSG00000148335	NTMT1	5.19955	3.44372	FALSE	FALSE
ENSG00000136271	DDX56	12.8256	3.43839	FALSE	FALSE
ENSG00000178950	GAK	3.32755	3.43616	FALSE	FALSE
ENSG00000137106	GRHPR	4.49797	3.43393	FALSE	TRUE
ENSG00000006062	MAP3K14	5.21884	3.43393	FALSE	FALSE
ENSG00000164182	NDUFAF2	4.13043	3.4337	FALSE	TRUE
ENSG00000084764	MAPRE3	6.72997	3.43337	FALSE	FALSE
ENSG00000110700	RPS13	15.7929	3.43311	FALSE	FALSE
ENSG00000106628	POLD2	20.435	3.43236	FALSE	FALSE
ENSG00000162729	IGSF8	6.99383	3.43072	FALSE	FALSE
ENSG00000068024	HDAC4	3.71954	3.42943	FALSE	FALSE
ENSG00000126934	MAP2K2	14.5583	3.42943	FALSE	FALSE
ENSG00000269711	CTD-3214H19.16	26.697	3.42753	FALSE	FALSE
ENSG00000130811	EIF3G	39.0637	3.42717	FALSE	FALSE
ENSG00000164068	RNF123	4.2466	3.42661	FALSE	FALSE
ENSG00000150459	SAP18	8.5261	3.42309	FALSE	FALSE
ENSG00000123159	GIPC1	13.5226	3.42119	FALSE	FALSE
ENSG00000104824	HNRNPL	14.832	3.41936	FALSE	FALSE
ENSG00000232956	SNHG15	5.23596	3.41893	FALSE	FALSE
ENSG00000148341	SH3GLB2	5.36066	3.4185	FALSE	FALSE
ENSG00000127054	CPSF3L	10.1111	3.41845	FALSE	FALSE
ENSG00000137309	HMGA1	18.5038	3.41845	FALSE	FALSE
ENSG00000073060	SCARB1	9.74795	3.41807	FALSE	FALSE
ENSG00000145147	SLIT2	3.7551	3.41807	FALSE	FALSE
ENSG00000140612	SEC11A	4.38638	3.41807	FALSE	FALSE
ENSG00000170445	HARS	4.66269	3.41807	FALSE	FALSE
ENSG00000116151	MORN1	4.38638	3.41807	FALSE	FALSE
ENSG00000132002	DNAJB1	3.64203	3.41807	FALSE	FALSE
ENSG00000178980	SEPW1	7.24824	3.4178	FALSE	FALSE
ENSG00000105220	GPI	73.3132	3.41515	FALSE	TRUE
ENSG00000142173	COL6A2	6.78998	3.41477	FALSE	FALSE
ENSG00000134779	TPGS2	7.37855	3.41463	FALSE	FALSE
ENSG00000162191	UBXN1	8.16851	3.41394	FALSE	FALSE
ENSG00000133935	C14orf1	4.52679	3.41394	FALSE	FALSE
ENSG00000189077	TMEM120A	11.4618	3.41302	FALSE	FALSE
ENSG00000184281	TSSC4	6.6763	3.41117	FALSE	FALSE
ENSG00000070444	MNT	3.02461	3.41117	FALSE	FALSE
ENSG00000059691	PET112	4.76065	3.41117	FALSE	TRUE
ENSG00000087086	FTL	13.6013	3.41117	FALSE	FALSE
lncRNA|lnc-IL10-1	lnc-IL10-1	3.15271	3.41117	FALSE	FALSE
ENSG00000065000	AP3D1	18.2117	3.40884	FALSE	FALSE
ENSG00000171045	TSNARE1	3.89685	3.40769	FALSE	FALSE
ENSG00000176058	TPRN	4.20052	3.40653	FALSE	FALSE
ENSG00000132024	CC2D1A	10.1295	3.40507	FALSE	FALSE
ENSG00000123933	MXD4	6.09213	3.40498	FALSE	FALSE
ENSG00000114054	PCCB	4.94021	3.40186	FALSE	TRUE
lncRNA|lnc-NUS1-5	RP11-632C17__A.1	3.30063	3.40186	FALSE	FALSE
ENSG00000033627	ATP6V0A1	5.54508	3.40069	FALSE	FALSE
ENSG00000115884	SDC1	6.19898	3.40069	FALSE	FALSE
ENSG00000141522	ARHGDIA	37.5274	3.39974	FALSE	FALSE
ENSG00000099783	HNRNPM	18.9907	3.39873	FALSE	FALSE
ENSG00000116459	ATP5F1	8.79355	3.39817	FALSE	TRUE
ENSG00000167797	CDK2AP2	12.1773	3.3976	FALSE	FALSE
ENSG00000166337	TAF10	3.21035	3.39716	FALSE	FALSE
ENSG00000257529	RPL36A	11.3023	3.39716	FALSE	FALSE
ENSG00000010361	FUZ	7.21069	3.39716	FALSE	FALSE
ENSG00000101365	IDH3B	11.1843	3.39685	FALSE	TRUE
ENSG00000075624	ACTB	60.1819	3.39643	FALSE	FALSE
ENSG00000153395	LPCAT1	7.17316	3.39539	FALSE	FALSE
ENSG00000183527	PSMG1	6.72997	3.39539	FALSE	FALSE
ENSG00000089327	FXYD5	12.862	3.39412	FALSE	FALSE
ENSG00000168522	FNTA	4.46676	3.39362	FALSE	FALSE
ENSG00000083807	SLC27A5	4.46676	3.39362	FALSE	FALSE
ENSG00000125818	PSMF1	4.66269	3.39362	FALSE	FALSE
ENSG00000156515	HK1	10.0769	3.39322	FALSE	TRUE
ENSG00000169564	PCBP1	19.1861	3.3927	FALSE	FALSE
ENSG00000023191	RNH1	3.93584	3.39243	FALSE	FALSE
ENSG00000105617	LENG1	4.11144	3.39243	FALSE	FALSE
ENSG00000130638	ATXN10	11.4618	3.3918	FALSE	FALSE
ENSG00000138326	RPS24	60.268	3.39154	FALSE	FALSE
ENSG00000167962	ZNF598	6.32358	3.38827	FALSE	FALSE
lncRNA|lnc-CPLX1-2	lnc-CPLX1-2	10.3312	3.38827	FALSE	FALSE
ENSG00000141698	NT5C3B	6.99896	3.38737	FALSE	FALSE
ENSG00000111642	CHD4	10.7543	3.38647	FALSE	FALSE
ENSG00000168159	RNF187	21.4706	3.38329	FALSE	FALSE
ENSG00000198015	MRPL42	3.57816	3.38288	FALSE	TRUE
ENSG00000137404	NRM	3.71954	3.38288	FALSE	FALSE
ENSG00000110063	DCPS	4.76065	3.38288	FALSE	FALSE
ENSG00000225450	RP3-508I15.14	5.77893	3.38288	FALSE	FALSE
ENSG00000179965	ZNF771	5.48737	3.38288	FALSE	FALSE
ENSG00000110987	BCL7A	3.05565	3.38288	FALSE	FALSE
ENSG00000107872	FBXL15	3.64203	3.38288	FALSE	FALSE
ENSG00000264668	ZFP41	3.57472	3.38288	FALSE	FALSE
ENSG00000198856	OSTC	4.11144	3.38107	FALSE	FALSE
ENSG00000131149	GSE1	4.11144	3.38107	FALSE	FALSE
ENSG00000174996	KLC2	8.80385	3.37896	FALSE	FALSE
ENSG00000162384	C1orf123	4.75491	3.37708	FALSE	FALSE
ENSG00000148308	GTF3C5	12.1759	3.37699	FALSE	FALSE
ENSG00000136045	PWP1	4.23678	3.37563	FALSE	FALSE
ENSG00000100151	PICK1	7.17316	3.37563	FALSE	TRUE
ENSG00000248167	RPP21	7.02363	3.37563	FALSE	FALSE
ENSG00000160447	PKN3	4.94021	3.37563	FALSE	FALSE
ENSG00000166295	ANAPC16	13.2772	3.37505	FALSE	FALSE
ENSG00000213190	MLLT11	6.3332	3.37319	FALSE	FALSE
ENSG00000184009	ACTG1	400	3.37304	FALSE	FALSE
ENSG00000171302	CANT1	4.13043	3.37271	FALSE	FALSE
ENSG00000113140	SPARC	15.2875	3.37271	FALSE	FALSE
ENSG00000136888	ATP6V1G1	9.02025	3.37145	FALSE	FALSE
ENSG00000103051	COG4	5.27369	3.37124	FALSE	FALSE
ENSG00000205670	SMIM11	3.46383	3.36953	FALSE	FALSE
ENSG00000156709	AIFM1	10.12	3.3683	FALSE	TRUE
ENSG00000104872	PIH1D1	9.45226	3.36807	FALSE	FALSE
ENSG00000197149	RP11-452G18.2	4.89432	3.36738	FALSE	FALSE
ENSG00000160216	AGPAT3	3.3787	3.36738	FALSE	FALSE
ENSG00000162300	ZFPL1	3.41176	3.36646	FALSE	FALSE
ENSG00000089154	GCN1L1	6.44509	3.36535	FALSE	FALSE
ENSG00000139410	SDSL	3.02461	3.36461	FALSE	TRUE
ENSG00000109736	MFSD10	8.58695	3.3636	FALSE	FALSE
ENSG00000038358	EDC4	5.78246	3.3619	FALSE	FALSE
ENSG00000171314	PGAM1	15.3871	3.36024	FALSE	FALSE
ENSG00000198818	SFT2D1	6.34221	3.35904	FALSE	FALSE
ENSG00000109180	OCIAD1	6.09213	3.35842	FALSE	TRUE
ENSG00000272047	GTF2H5	4.38638	3.35842	FALSE	FALSE
ENSG00000137216	TMEM63B	10.7173	3.35792	FALSE	FALSE
ENSG00000075618	FSCN1	13.4748	3.35786	FALSE	FALSE
ENSG00000138030	KHK	6.8006	3.35629	FALSE	FALSE
ENSG00000066136	NFYC	4.95171	3.35531	FALSE	FALSE
ENSG00000172572	PDE3A	6.99978	3.35531	FALSE	FALSE
ENSG00000204348	DXO	4.95171	3.35531	FALSE	FALSE
ENSG00000173812	EIF1	25.9597	3.3548	FALSE	FALSE
ENSG00000117448	AKR1A1	8.37316	3.35373	FALSE	FALSE
ENSG00000166925	TSC22D4	5.49844	3.35343	FALSE	FALSE
ENSG00000181555	SETD2	5.49844	3.35343	FALSE	FALSE
ENSG00000110801	PSMD9	3.29644	3.35343	FALSE	FALSE
ENSG00000108826	MRPL27	18.7116	3.35285	FALSE	TRUE
ENSG00000125912	NCLN	10.1582	3.35251	FALSE	FALSE
ENSG00000101190	TCFL5	4.84086	3.35218	FALSE	FALSE
ENSG00000130702	LAMA5	3.53053	3.35092	FALSE	FALSE
ENSG00000059573	ALDH18A1	14.6647	3.35061	FALSE	TRUE
ENSG00000167004	PDIA3	24.1236	3.35014	FALSE	FALSE
ENSG00000107833	NPM3	8.5261	3.3484	FALSE	FALSE
ENSG00000180340	FZD2	5.17451	3.34739	FALSE	FALSE
ENSG00000100296	THOC5	7.54476	3.34588	FALSE	FALSE
ENSG00000040608	RTN4R	8.06971	3.34588	FALSE	FALSE
ENSG00000004478	FKBP4	52.4472	3.34494	FALSE	FALSE
ENSG00000125868	DSTN	10.3244	3.34493	FALSE	FALSE
ENSG00000102181	CD99L2	4.79507	3.3437	FALSE	FALSE
ENSG00000168528	SERINC2	3.97725	3.34207	FALSE	FALSE
ENSG00000188681	lnc-KCNE1B-10	4.08238	3.34207	FALSE	FALSE
ENSG00000075239	ACAT1	4.66269	3.34207	FALSE	TRUE
ENSG00000130706	ADRM1	14.6044	3.34207	FALSE	FALSE
ENSG00000101187	SLCO4A1	3.67287	3.34207	FALSE	FALSE
ENSG00000103342	GSPT1	8.55407	3.34135	FALSE	FALSE
ENSG00000103426	CORO7-PAM16	6.99383	3.34043	FALSE	TRUE
ENSG00000136448	NMT1	5.88237	3.34016	FALSE	FALSE
ENSG00000141985	SH3GL1	9.6777	3.34016	FALSE	FALSE
ENSG00000181222	POLR2A	44.2855	3.33905	FALSE	FALSE
ENSG00000244486	SCARF2	9.27902	3.33739	FALSE	FALSE
ENSG00000163344	PMVK	6.56138	3.33619	FALSE	FALSE
ENSG00000101460	MAP1LC3A	3.5249	3.3344	FALSE	FALSE
ENSG00000099282	TSPAN15	3.5249	3.3344	FALSE	FALSE
ENSG00000221988	PPT2	10.0239	3.33375	FALSE	FALSE
ENSG00000100650	SRSF5	18.09	3.33318	FALSE	FALSE
ENSG00000125457	MIF4GD	3.30063	3.33311	FALSE	FALSE
ENSG00000189339	SLC35E2B	5.82379	3.33311	FALSE	FALSE
ENSG00000160789	LMNA	4.38638	3.33311	FALSE	FALSE
ENSG00000117862	TXNDC12	19.2568	3.33217	FALSE	TRUE
ENSG00000142657	PGD	30.3186	3.33211	FALSE	FALSE
ENSG00000101444	AHCY	26.775	3.33113	FALSE	FALSE
ENSG00000117394	SLC2A1	5.35892	3.33053	FALSE	FALSE
ENSG00000174547	MRPL11	6.63127	3.33053	FALSE	TRUE
ENSG00000055070	SZRD1	4.14364	3.33053	FALSE	FALSE
ENSG00000184117	NIPSNAP1	8.99559	3.32995	FALSE	TRUE
ENSG00000071889	FAM3A	10.7852	3.32808	FALSE	FALSE
ENSG00000204469	PRRC2A	21.5331	3.32648	FALSE	FALSE
ENSG00000185883	RP11-20I23.1	19.2185	3.32629	FALSE	FALSE
ENSG00000139645	ANKRD52	6.94302	3.32586	FALSE	FALSE
ENSG00000104980	TIMM44	7.37855	3.32371	FALSE	TRUE
ENSG00000204580	DDR1	6.99896	3.32273	FALSE	FALSE
ENSG00000270170	NCBP2-AS2	3.15271	3.32273	FALSE	FALSE
ENSG00000114767	RRP9	5.00345	3.32273	FALSE	FALSE
ENSG00000115677	HDLBP	4.66853	3.32128	FALSE	FALSE
ENSG00000250571	GLI4	8.80407	3.32116	FALSE	FALSE
ENSG00000103018	CYB5B	23.2377	3.31889	FALSE	TRUE
ENSG00000131871	VIMP	16.2522	3.31858	FALSE	FALSE
ENSG00000101294	HM13	16.5737	3.31804	FALSE	FALSE
ENSG00000129255	MPDU1	24.8817	3.31666	FALSE	FALSE
ENSG00000022277	RTFDC1	8.09317	3.31643	FALSE	FALSE
ENSG00000205726	ITSN1	6.56138	3.31643	FALSE	FALSE
ENSG00000100600	LGMN	3.71954	3.31573	FALSE	FALSE
ENSG00000186010	YJEFN3	25.1377	3.31526	FALSE	TRUE
ENSG00000204590	GNL1	12.3933	3.31485	FALSE	FALSE
ENSG00000138663	COPS4	5.82379	3.31485	FALSE	FALSE
ENSG00000262664	OVCA2	15.0232	3.31449	FALSE	FALSE
ENSG00000008988	RPS20	68.9923	3.31325	FALSE	FALSE
ENSG00000170473	WIBG	5.99446	3.3122	FALSE	FALSE
ENSG00000069275	NUCKS1	10.7058	3.31061	FALSE	FALSE
ENSG00000065154	OAT	14.5939	3.30938	FALSE	TRUE
ENSG00000141510	TP53	15.3729	3.30814	FALSE	FALSE
ENSG00000114544	SLC41A3	3.21035	3.30688	FALSE	FALSE
ENSG00000111737	RAB35	8.06971	3.30688	FALSE	TRUE
ENSG00000108439	PNPO	8.953	3.30688	FALSE	TRUE
ENSG00000103811	CTSH	3.05565	3.30688	FALSE	FALSE
ENSG00000136628	EPRS	5.55637	3.30688	FALSE	FALSE
ENSG00000034152	MAP2K3	4.3401	3.30573	FALSE	FALSE
ENSG00000167965	MLST8	9.66439	3.30447	FALSE	FALSE
ENSG00000175390	EIF3F	7.32429	3.30447	FALSE	FALSE
ENSG00000183207	RUVBL2	9.02025	3.30159	FALSE	FALSE
ENSG00000197070	ARRDC1	10.12	3.30151	FALSE	FALSE
ENSG00000102226	USP11	27.7067	3.30016	FALSE	FALSE
ENSG00000204619	PPP1R11	7.21747	3.29997	FALSE	FALSE
ENSG00000135930	EIF4E2	4.96441	3.29963	FALSE	FALSE
ENSG00000136942	RPL35	400	3.29844	FALSE	FALSE
ENSG00000111652	COPS7A	5.80788	3.29719	FALSE	FALSE
ENSG00000119333	WDR34	9.16678	3.29566	FALSE	FALSE
ENSG00000071626	DAZAP1	11.9614	3.29562	FALSE	FALSE
ENSG00000104853	CLPTM1	25.5394	3.29495	FALSE	FALSE
ENSG00000112312	GMNN	9.50855	3.29339	FALSE	FALSE
ENSG00000073169	SELO	6.88995	3.29339	FALSE	TRUE
ENSG00000144713	RPL32	44.0303	3.29265	FALSE	FALSE
ENSG00000171135	JAGN1	4.58408	3.29066	FALSE	FALSE
ENSG00000059145	UNKL	6.38558	3.29066	FALSE	FALSE
ENSG00000145979	TBC1D7	4.76695	3.29066	FALSE	FALSE
ENSG00000185359	HGS	24.6515	3.28999	FALSE	FALSE
ENSG00000136908	DPM2	4.13713	3.2893	FALSE	FALSE
ENSG00000175768	TOMM5	10.8094	3.28655	FALSE	TRUE
ENSG00000103249	CLCN7	3.82413	3.28655	FALSE	FALSE
ENSG00000140319	SRP14	9.32436	3.28655	FALSE	FALSE
ENSG00000189241	TSPYL1	4.74919	3.28597	FALSE	FALSE
ENSG00000171960	PPIH	15.821	3.28346	FALSE	FALSE
ENSG00000090013	BLVRB	5.55637	3.28242	FALSE	FALSE
ENSG00000133275	CSNK1G2	4.33786	3.28242	FALSE	FALSE
ENSG00000108591	DRG2	3.83801	3.28242	FALSE	FALSE
ENSG00000100321	SYNGR1	5.66094	3.28242	FALSE	FALSE
ENSG00000188486	H2AFX	30.7054	3.28218	FALSE	FALSE
ENSG00000165119	HNRNPK	4.54604	3.28076	FALSE	FALSE
ENSG00000147669	POLR2K	8.47728	3.28064	FALSE	FALSE
ENSG00000160753	RUSC1	8.82068	3.27965	FALSE	FALSE
ENSG00000175221	MED16	6.32358	3.27965	FALSE	FALSE
ENSG00000132128	LRRC41	33.9895	3.27818	FALSE	FALSE
ENSG00000145730	PAM	8.86138	3.27743	FALSE	FALSE
ENSG00000157933	SKI	5.87546	3.27687	FALSE	FALSE
ENSG00000117385	LEPRE1	5.6514	3.2752	FALSE	FALSE
ENSG00000167578	RAB4B	6.61887	3.27408	FALSE	FALSE
ENSG00000007923	DNAJC11	7.22608	3.27408	FALSE	TRUE
ENSG00000100364	KIAA0930	5.62001	3.27296	FALSE	FALSE
ENSG00000270136	NBL1	6.2323	3.2724	FALSE	FALSE
ENSG00000111229	ARPC3	24.7951	3.27234	FALSE	FALSE
ENSG00000100567	PSMA3	5.56204	3.27168	FALSE	FALSE
ENSG00000130511	SSBP4	14.9455	3.27159	FALSE	FALSE
ENSG00000149823	VPS51	4.07559	3.27034	FALSE	FALSE
ENSG00000185090	MANEAL	3.83801	3.26988	FALSE	FALSE
ENSG00000141314	RHBDL3	3.29644	3.26847	FALSE	FALSE
lncRNA|lnc-GLT6D1-2	lnc-GLT6D1-2	5.19955	3.26847	FALSE	FALSE
ENSG00000076604	TRAF4	4.76065	3.26847	FALSE	FALSE
ENSG00000178409	BEND3	4.73444	3.26776	FALSE	FALSE
ENSG00000166851	PLK1	20.4074	3.26743	FALSE	FALSE
ENSG00000104897	SF3A2	25.9247	3.266	FALSE	FALSE
lncRNA|lnc-THOC1-1	ZNF519	3.41176	3.26564	FALSE	FALSE
ENSG00000152556	PFKM	3.41176	3.26564	FALSE	FALSE
ENSG00000133315	MACROD1	3.05565	3.26564	FALSE	TRUE
ENSG00000113643	RARS	3.56628	3.26564	FALSE	TRUE
ENSG00000139722	VPS37B	6.50671	3.26564	FALSE	FALSE
ENSG00000165629	ATP5C1	12.6331	3.26399	FALSE	TRUE
ENSG00000143368	SF3B4	17.4339	3.26375	FALSE	FALSE
ENSG00000183741	CBX6	7.51373	3.26224	FALSE	FALSE
ENSG00000137509	PRCP	5.42983	3.2621	FALSE	FALSE
ENSG00000101421	CHMP4B	16.8705	3.2621	FALSE	FALSE
ENSG00000185883	ATP6C	11.4916	3.26192	FALSE	FALSE
ENSG00000117020	AKT3	4.49129	3.26139	FALSE	FALSE
ENSG00000166913	YWHAB	4.32895	3.25996	FALSE	FALSE
ENSG00000153823	PID1	4.32895	3.25996	FALSE	FALSE
ENSG00000179151	EDC3	4.23678	3.25996	FALSE	FALSE
ENSG00000110200	ANAPC15	4.32895	3.25996	FALSE	FALSE
ENSG00000103507	BCKDK	8.05597	3.25874	FALSE	TRUE
ENSG00000124587	PEX6	8.80407	3.25839	FALSE	FALSE
ENSG00000176845	METRNL	4.52679	3.25797	FALSE	FALSE
ENSG00000108384	RAD51C	3.15271	3.25711	FALSE	FALSE
lncRNA|lnc-TXNDC2-1	lnc-TXNDC2-1	3.29644	3.25711	FALSE	FALSE
ENSG00000267679	EIF5AP2	3.29644	3.25711	FALSE	FALSE
ENSG00000149782	PLCB3	3.57816	3.25711	FALSE	FALSE
ENSG00000182195	LDOC1	11.0267	3.25711	FALSE	FALSE
ENSG00000155115	GTF3C6	3.4644	3.25711	FALSE	FALSE
ENSG00000113460	BRIX1	3.21035	3.25711	FALSE	FALSE
ENSG00000241973	PI4KA	6.36132	3.25711	FALSE	TRUE
ENSG00000214113	LYRM4	5.09917	3.2552	FALSE	TRUE
ENSG00000197694	SPTAN1	31.569	3.25408	FALSE	FALSE
ENSG00000006712	PAF1	11.8827	3.25398	FALSE	FALSE
ENSG00000100304	TTLL12	18.7181	3.25338	FALSE	FALSE
ENSG00000046647	GEMIN8	4.84086	3.25136	FALSE	FALSE
ENSG00000184277	TM2D3	4.38638	3.25136	FALSE	FALSE
ENSG00000105429	MEGF8	4.89432	3.25064	FALSE	FALSE
ENSG00000142694	EVA1B	3.86163	3.2502	FALSE	FALSE
ENSG00000047315	POLR2B	3.17513	3.2502	FALSE	FALSE
ENSG00000197043	ANXA6	10.3355	3.24702	FALSE	FALSE
ENSG00000010803	SCMH1	7.59022	3.24673	FALSE	FALSE
ENSG00000167272	POP5	3.29644	3.24557	FALSE	FALSE
ENSG00000026297	RNASET2	6.82942	3.24411	FALSE	FALSE
ENSG00000180530	NRIP1	4.94021	3.24411	FALSE	FALSE
ENSG00000096060	FKBP5	3.9317	3.24411	FALSE	FALSE
ENSG00000212864	RNF208	3.02874	3.24411	FALSE	FALSE
ENSG00000119782	FKBP1B	4.73444	3.24411	FALSE	FALSE
ENSG00000168802	CHTF8	4.11144	3.24265	FALSE	FALSE
ENSG00000149476	DAK	3.46383	3.24265	FALSE	FALSE
ENSG00000103326	CAPN15	11.9111	3.24153	FALSE	FALSE
ENSG00000070614	NDST1	3.56628	3.24119	FALSE	FALSE
ENSG00000213638	ADAT3	6.78998	3.23884	FALSE	FALSE
ENSG00000188157	AGRN	22.2001	3.23793	FALSE	FALSE
ENSG00000117399	CDC20	9.48789	3.23705	FALSE	FALSE
ENSG00000170619	COMMD5	3.92383	3.23265	FALSE	FALSE
ENSG00000085063	CD59	4.08238	3.23087	FALSE	FALSE
ENSG00000179886	TIGD5	3.21035	3.23087	FALSE	FALSE
ENSG00000189067	LITAF	5.6523	3.23087	FALSE	FALSE
ENSG00000197448	GSTK1	10.1734	3.22928	FALSE	TRUE
ENSG00000196700	ZNF512B	3.56628	3.22864	FALSE	FALSE
ENSG00000118418	HMGN3	9.04972	3.22864	FALSE	FALSE
ENSG00000167113	COQ4	4.76205	3.22864	FALSE	TRUE
ENSG00000198755	RPL10A	19.9715	3.22864	FALSE	TRUE
ENSG00000132361	CLUH	4.07559	3.2279	FALSE	FALSE
ENSG00000242299	RP11-234A1.1	6.87167	3.22766	FALSE	FALSE
ENSG00000162493	PDPN	7.67996	3.22753	FALSE	FALSE
ENSG00000100813	ACIN1	5.22859	3.22705	FALSE	FALSE
ENSG00000158864	NDUFS2	3.76326	3.22641	FALSE	TRUE
ENSG00000089876	DHX32	4.46676	3.22641	FALSE	FALSE
ENSG00000149196	C11orf73	4.46676	3.22641	FALSE	FALSE
ENSG00000183431	SF3A3	10.7629	3.22453	FALSE	FALSE
ENSG00000168591	TMUB2	10.1058	3.22441	FALSE	FALSE
ENSG00000139725	RHOF	4.57978	3.2232	FALSE	FALSE
MI0014210	hsa-mir-3176	18.9907	3.2221	FALSE	FALSE
ENSG00000142409	ZNF787	6.14591	3.22191	FALSE	FALSE
ENSG00000156521	TYSND1	11.8827	3.22191	FALSE	TRUE
ENSG00000142453	CARM1	4.76065	3.22191	FALSE	FALSE
ENSG00000203485	INF2	3.15271	3.22191	FALSE	FALSE
ENSG00000108010	GLRX3	3.29644	3.22191	FALSE	FALSE
ENSG00000224051	GLTPD1	4.38638	3.22191	FALSE	FALSE
ENSG00000120265	PCMT1	5.48737	3.22191	FALSE	FALSE
lncRNA|lnc-PDE6B-2	lnc-PDE6B-2	3.15271	3.22191	FALSE	FALSE
ENSG00000131591	C1orf159	5.99446	3.22191	FALSE	FALSE
ENSG00000070495	JMJD6	9.47457	3.22084	FALSE	FALSE
ENSG00000143799	PARP1	8.37316	3.21852	FALSE	FALSE
ENSG00000099956	SMARCB1	19.7058	3.21819	FALSE	FALSE
ENSG00000136463	TACO1	8.40134	3.21727	FALSE	TRUE
ENSG00000161013	MGAT4B	10.3312	3.21689	FALSE	FALSE
ENSG00000130165	ELOF1	6.99978	3.21588	FALSE	FALSE
ENSG00000122034	GTF3A	4.74603	3.21588	FALSE	FALSE
ENSG00000115461	IGFBP5	4.49797	3.21487	FALSE	FALSE
ENSG00000110958	PTGES3	9.6634	3.21182	FALSE	FALSE
ENSG00000196290	NIF3L1	3.02874	3.21055	FALSE	TRUE
ENSG00000105556	MIER2	4.95171	3.21055	FALSE	FALSE
ENSG00000123815	ADCK4	5.38514	3.21055	FALSE	TRUE
ENSG00000163902	RPN1	26.5295	3.20731	FALSE	FALSE
ENSG00000064932	SBNO2	3.20661	3.2055	FALSE	FALSE
ENSG00000168259	DNAJC7	17.7679	3.20533	FALSE	FALSE
ENSG00000188681	TEKT4P2	6.54863	3.20365	FALSE	FALSE
ENSG00000120896	SORBS3	4.57978	3.20167	FALSE	FALSE
ENSG00000114867	EIF4G1	45.8866	3.20138	FALSE	FALSE
ENSG00000213923	CSNK1E	5.80788	3.20087	FALSE	FALSE
ENSG00000137700	SLC37A4	4.97457	3.19901	FALSE	TRUE
ENSG00000152240	HAUS1	6.97803	3.19849	FALSE	FALSE
ENSG00000180900	SCRIB	5.88237	3.19746	FALSE	FALSE
ENSG00000173786	CNP	23.277	3.19532	FALSE	FALSE
ENSG00000184584	TMEM173	4.96441	3.19434	FALSE	FALSE
ENSG00000197345	MRPL21	6.76462	3.19434	FALSE	TRUE
ENSG00000163430	FSTL1	3.44638	3.19434	FALSE	FALSE
ENSG00000212123	PRR22	5.19955	3.19247	FALSE	FALSE
ENSG00000196230	TUBB	77.4277	3.19203	FALSE	FALSE
ENSG00000196502	SULT1A1	6.57955	3.19121	FALSE	FALSE
ENSG00000132423	COQ3	3.57472	3.19121	FALSE	TRUE
ENSG00000108039	XPNPEP1	3.57472	3.19121	FALSE	FALSE
ENSG00000100429	HDAC10	6.77389	3.18996	FALSE	FALSE
ENSG00000137563	GGH	7.21726	3.18813	FALSE	FALSE
ENSG00000147224	PRPS1	6.10579	3.18672	FALSE	FALSE
ENSG00000160404	TOR2A	3.46383	3.18491	FALSE	FALSE
ENSG00000110442	COMMD9	6.14591	3.18491	FALSE	FALSE
ENSG00000163918	RFC4	3.46383	3.18491	FALSE	FALSE
ENSG00000107372	ZFAND5	3.29644	3.18491	FALSE	FALSE
ENSG00000186187	ZNRF1	3.29644	3.18491	FALSE	FALSE
ENSG00000189114	BLOC1S3	3.29644	3.18491	FALSE	FALSE
ENSG00000125534	PPDPF	17.7171	3.18406	FALSE	FALSE
ENSG00000071564	TCF3	4.64253	3.18333	FALSE	FALSE
ENSG00000132475	H3F3B	41.598	3.18313	FALSE	FALSE
ENSG00000131473	ACLY	16.8196	3.18193	FALSE	TRUE
ENSG00000177105	RHOG	4.46676	3.18111	FALSE	FALSE
ENSG00000033011	ALG1	6.10546	3.18111	FALSE	FALSE
ENSG00000044574	HSPA5	8.79355	3.17869	FALSE	FALSE
ENSG00000100353	EIF3D	19.8419	3.17776	FALSE	FALSE
ENSG00000101160	CTSZ	5.09917	3.17643	FALSE	FALSE
ENSG00000047644	WWC3	4.84086	3.17536	FALSE	FALSE
ENSG00000167987	VPS37C	4.2466	3.17536	FALSE	FALSE
ENSG00000170310	STX8	3.21035	3.17536	FALSE	FALSE
ENSG00000147416	ATP6V1B2	3.67287	3.17536	FALSE	FALSE
ENSG00000068745	IP6K2	5.88237	3.17456	FALSE	FALSE
ENSG00000013275	PSMC4	13.2005	3.17404	FALSE	FALSE
ENSG00000264364	DYNLL2	5.42518	3.17343	FALSE	FALSE
ENSG00000132612	VPS4A	5.19955	3.17215	FALSE	FALSE
ENSG00000100207	TCF20	3.29644	3.17215	FALSE	FALSE
ENSG00000103187	COTL1	3.85704	3.17215	FALSE	FALSE
ENSG00000269237	LINC01480	5.6523	3.16956	FALSE	FALSE
ENSG00000006744	ELAC2	19.4367	3.16956	FALSE	TRUE
ENSG00000089063	TMEM230	3.65203	3.16811	FALSE	FALSE
ENSG00000169136	ATF5	8.15798	3.16623	FALSE	FALSE
ENSG00000131238	PPT1	8.10735	3.16519	FALSE	FALSE
ENSG00000173349	SFT2D3	6.94302	3.16428	FALSE	FALSE
ENSG00000115053	NCL	36.4702	3.16415	FALSE	FALSE
ENSG00000168758	SEMA4C	4.08238	3.16372	FALSE	FALSE
ENSG00000196233	LCOR	4.64253	3.16242	FALSE	FALSE
ENSG00000120533	ENY2	3.20661	3.16177	FALSE	FALSE
ENSG00000157954	WIPI2	3.20661	3.16177	FALSE	FALSE
ENSG00000170604	IRF2BP1	11.7824	3.16136	FALSE	FALSE
ENSG00000101057	MYBL2	9.9206	3.16114	FALSE	FALSE
ENSG00000103257	SLC7A5	6.10546	3.1602	FALSE	FALSE
ENSG00000196531	NACA	9.65803	3.15948	FALSE	FALSE
ENSG00000113734	BNIP1	4.07559	3.15915	FALSE	FALSE
ENSG00000122642	FKBP9	3.57472	3.15915	FALSE	FALSE
[truncated: 227 more rows]

## Sheet: B.LARP4_eCLIP_HEK293_by_region
ENSG	Symbol	l2fc_avg(all_Exon)	l2fc_avg(5_UTR)	l2fc_avg(CDS)	l2fc_avg(3_UTR)	ProteinLength	MitoCarta
ENSG00000112695	COX7A2	6.09945		6.08285	6.6654	115	TRUE
ENSG00000099977	DDT	5.6409		6.42235	5.4724	118	FALSE
ENSG00000105427	CNFN	5.4359		4.9868	5.38285	112	FALSE
ENSG00000175701	LINC00116	5.40295					FALSE
ENSG00000213741	RPS29	5.37155	5.23585	5.5757	5.08285	67	FALSE
ENSG00000167779	IGFBP6	5.31285		4.8972		240	FALSE
ENSG00000135940	COX5B	5.2888	4.6256	5.265	5.9728	129	TRUE
ENSG00000126267	COX6B1	5.2179	4.5831	4.9263	5.6488	86	TRUE
ENSG00000130208	APOC1	5.1693		3.8756	4.87565	83	FALSE
ENSG00000159199	ATP5G1	5.1607	2.9689	5.03015	5.9664	136	TRUE
ENSG00000226976	COX6A1P2	5.11255		4.6478			FALSE
ENSG00000171159	C9orf16	5.0481	4.52925	5.0902	5.46135	83	FALSE
ENSG00000167283	ATP5L	4.9927	3.0361	6.6014	4.20715	103	TRUE
ENSG00000100300	TSPO	4.98875	3.44225	5.09025	7.0665	169	TRUE
ENSG00000125995	ROMO1	4.94845	3.40185	5.03345	5.27545	79	TRUE
ENSG00000198832	SELM	4.92065	4.3363	5.085	4.50235	145	FALSE
ENSG00000171858	RPS21	4.8835	4.94865	5.0179	3.72845	83	FALSE
ENSG00000131495	NDUFA2	4.8802	4.50305	4.74885	6.02605	99	TRUE
ENSG00000147684	NDUFB9	4.87255	4.33945	4.8384	5.5617	179	TRUE
ENSG00000196976	LAGE3	4.8677	3.4621	5.11235	5.00925	143	FALSE
ENSG00000177700	POLR2L	4.84205	2.9816	4.90835	5.18225	67	FALSE
ENSG00000156298	TSPAN7	4.83055			4.83055	249	FALSE
ENSG00000127540	UQCR11	4.7734	4.6681	5.08365	4.5858	56	TRUE
ENSG00000134809	TIMM10	4.77235	4.1879	4.6446	5.05635	90	TRUE
ENSG00000182154	MRPL41	4.74525	3.93615	4.9443	6.5061	137	TRUE
ENSG00000179085	DPM3	4.7251		4.915	4.5438	122	FALSE
ENSG00000229833	PET100	4.7185		6.45405	1.6297	73	TRUE
ENSG00000184990	SIVA1	4.7056	5.07905	4.5339	5.70525	175	FALSE
ENSG00000086506	HBQ1	4.6849		4.42665		142	FALSE
ENSG00000184924	PTRHD1	4.67775		4.9014	4.30215	140	FALSE
ENSG00000174917	C19orf70	4.67575		4.60725	5.26135	118	TRUE
ENSG00000042753	AP2S1	4.6725	3.12695	4.568	5.23885	142	FALSE
ENSG00000155366	RHOC	4.65135		5.43125	4.3729	193	FALSE
ENSG00000125356	NDUFA1	4.62895	3.39185	4.3154	6.3974	70	TRUE
ENSG00000143198	MGST3	4.6147	3.55755	4.8655	4.4821	152	TRUE
ENSG00000187193	MT1X	4.59575	3.83055	4.99785	4.67535	61	FALSE
ENSG00000119013	NDUFB3	4.5895	3.56355	4.41315	6.4231	98	TRUE
ENSG00000189043	NDUFA4	4.58405	3.8858	3.92005	6.61165	81	TRUE
ENSG00000183617	MRPL54	4.5741		4.18335	5.20385	138	TRUE
ENSG00000204272	RP11-622K12.1	4.5721					FALSE
ENSG00000126768	TIMM17B	4.5636		4.2647	4.91925	222	TRUE
ENSG00000152082	MZT2B	4.56165	3.5955	4.64665	4.50835	158	FALSE
ENSG00000152082	MZT2B	4.56165	3.5955	4.64665	4.50835	158	FALSE
ENSG00000261514	RP11-527L4.2	4.56095			4.20365		FALSE
ENSG00000130332	LSM7	4.56095		4.3561	4.9136	103	FALSE
ENSG00000123810	B9D2	4.54385		3.7441		175	FALSE
ENSG00000267855	NDUFA7	4.5397		4.35285	5.6264		FALSE
ENSG00000100387	RBX1	4.5351		4.7002	4.50475	108	FALSE
ENSG00000054148	PHPT1	4.52805	1.44975	3.72095	5.9304	127	FALSE
ENSG00000164919	COX6C	4.52375	3.49715	4.71175	5.6874	75	TRUE
ENSG00000198937	CCDC167	4.49245		3.95575	4.9324	97	FALSE
ENSG00000106400	ZNHIT1	4.48835		4.0461	6.1221	154	FALSE
ENSG00000243449	C4orf48	4.4779		4.5242	3.67535	128	FALSE
ENSG00000166595	FAM96B	4.4728		4.1116	6.8678	163	FALSE
ENSG00000164405	UQCRQ	4.46925	3.5697	4.41045	5.21515	82	TRUE
ENSG00000197728	RPS26	4.44665	5.0886	4.2454		115	FALSE
ENSG00000128524	ATP6V1F	4.4393	3.7312	4.87305	4.39285	147	FALSE
ENSG00000198918	RPL39	4.4376	4.36335	4.0534	4.50745	51	FALSE
ENSG00000118640	VAMP8	4.4366	3.6912	3.68955	5.5426	100	FALSE
ENSG00000169976	SF3B5	4.436	4.90735	4.2071	4.4669	86	FALSE
ENSG00000198258	UBL5	4.4356	3.9421	4.99975	4.795	73	FALSE
ENSG00000233927	RPS28	4.4347	4.58815	5.2944	3.5034	69	FALSE
ENSG00000182117	NOP10	4.41665	3.91805	3.64695	5.03765	64	FALSE
ENSG00000134825	TMEM258	4.41075	2.6849	4.5696	5.13415	79	FALSE
ENSG00000173272	MZT2A	4.38995	4.79525	4.2656	5.36465		FALSE
ENSG00000100097	LGALS1	4.387	3.75715	4.2362		135	FALSE
ENSG00000140990	NDUFB10	4.38175	3.49845	4.0371	5.68145	172	TRUE
ENSG00000130748	TMEM160	4.3806	3.02035	4.3781	4.54205	188	FALSE
ENSG00000106153	CHCHD2	4.37765	3.6742	3.958	5.3685	151	TRUE
ENSG00000084207	GSTP1	4.36855	2.40185	4.28615	6.03405	210	FALSE
ENSG00000214736	TOMM6	4.3649	3.9077	4.09785	4.4962		FALSE
ENSG00000135390	ATP5G2	4.3643	0.8693	4.21975	4.8243	198	TRUE
ENSG00000130303	BST2	4.35345				180	FALSE
ENSG00000121900	TMEM54	4.34245	3.7441	4.2027		222	FALSE
ENSG00000141552	ANAPC11	4.325	3.3213	4.35705	5.2588	196	FALSE
ENSG00000142694	EVA1B	4.32235		4.42235	4.38825	165	FALSE
ENSG00000205155	PSENEN	4.3195	3.89865	4.00395	5.2246	101	FALSE
ENSG00000182899	RPL35A	4.31175	3.86575	4.99805	1.8985	110	TRUE
ENSG00000112514	CUTA	4.3111	3.47185	4.2444	5.37425	198	FALSE
ENSG00000196154	S100A4	4.29065				101	FALSE
ENSG00000034510	TMSB10	4.28965	4.0936	4.3929	4.3564	44	FALSE
ENSG00000125148	MT2A	4.28835	4.4308	4.01075	5.99225	61	FALSE
ENSG00000099385	BCL7C	4.2858	4.99645	4.41525	3.39895	242	FALSE
ENSG00000125743	SNRPD2	4.27975	1.7307	4.0375	5.684	118	FALSE
ENSG00000142089	IFITM3	4.2741		4.17645	4.699	133	FALSE
ENSG00000147123	NDUFB11	4.2713		4.1033	5.40065	163	TRUE
ENSG00000150779	TIMM8B	4.25795		4.2411	4.6456	98	TRUE
ENSG00000074842	C19orf10	4.25615	3.7441	4.15155	4.3752	173	FALSE
ENSG00000233276	GPX1	4.25355	3.41805	4.08675	4.9548	203	TRUE
ENSG00000181649	PHLDA2	4.2441		3.76985	3.70365	152	FALSE
ENSG00000171222	SCAND1	4.2379	2.9427	4.05905	5.2541	242	FALSE
ENSG00000168653	NDUFS5	4.2318	2.9982	4.2053	5.61345	106	TRUE
ENSG00000145494	NDUFS6	4.22025	3.41805	3.8922	5.1986	124	TRUE
ENSG00000141741	MIEN1	4.2141		4.0763	4.32995	115	FALSE
ENSG00000214026	MRPL23	4.20845	2.6459	3.7576	6.2471	153	TRUE
ENSG00000140264	SERF2	4.20145	3.42715	4.3208	2.91025	170	FALSE
ENSG00000140264	SERF2	4.20145	3.42715	4.3208	2.91025	129	FALSE
ENSG00000211450	C11orf31	4.1709	3.0144	4.9182	3.40705	122	FALSE
ENSG00000172428	MYEOV2	4.1697		3.74155	5.5113	252	FALSE
ENSG00000196683	TOMM7	4.16585	4.4406	4.0549	3.8474	55	TRUE
ENSG00000117691	NENF	4.1655	4.1062	4.06525	5.0471	172	FALSE
ENSG00000105404	RABAC1	4.16345	4.1139	3.8378	4.9056	185	FALSE
ENSG00000125835	SNRPB	4.15765	3.33705	4.23245	4.30945	240	FALSE
ENSG00000166228	PCBD1	4.15095		3.95535	4.5083	104	FALSE
ENSG00000228474	OST4	4.1477	3.5275	4.8586	4.2771	37	FALSE
ENSG00000101443	WFDC2	4.1459				124	FALSE
ENSG00000113763	UNC5A	4.13835				842	FALSE
ENSG00000145912	NHP2	4.1292	3.27245	3.67645	5.3987	153	FALSE
ENSG00000232388	LINC00493	4.1269					FALSE
ENSG00000156411	C14orf2	4.1258	4.24845	4.0351	4.1918	75	TRUE
ENSG00000131174	COX7B	4.1078	4.35185	4.5557	2.56095	80	TRUE
ENSG00000131143	COX4I1	4.10375	3.9386	4.00535	4.4338	169	TRUE
ENSG00000164587	RPS14	4.10035	2.8723	4.35225	0.7571	151	TRUE
ENSG00000131981	LGALS3	4.0904		3.88285		250	FALSE
ENSG00000180992	MRPL14	4.0875	4.1238	3.73525	4.9398	145	TRUE
ENSG00000168701	TMEM208	4.0801	2.5144	4.2276	4.6566	173	FALSE
ENSG00000126432	PRDX5	4.0688	4.80185	3.81385	4.50745	214	TRUE
ENSG00000087884	AAMDC	4.0649		4.17535		122	FALSE
ENSG00000007255	TRAPPC6A	4.0636		3.68965	5.1256	173	FALSE
ENSG00000211445	GPX3	4.06145		4.59915	3.9146	226	FALSE
ENSG00000165502	RPL36AL	4.0603	3.9493	3.61865	5.0144	106	FALSE
ENSG00000101084	C20orf24	4.0496			4.0496	143	TRUE
ENSG00000173660	UQCRH	4.0465	4.0287	3.96415	4.37935	91	TRUE
ENSG00000173660	UQCRH	4.0465	4.0287	3.96415	4.37935	91	TRUE
ENSG00000215845	TSTD1	4.04515	2.75135	3.9955	5.50985	115	TRUE
ENSG00000112667	DNPH1	4.04215		4.0971	3.9105	174	FALSE
ENSG00000198931	APRT	4.0401		3.8573	5.03385	180	FALSE
ENSG00000119632	IFI27L2	4.03655		3.96945		130	FALSE
ENSG00000243147	MRPL33	4.036	3.9876	4.01545	4.20145	65	TRUE
ENSG00000196754	S100A2	4.0351				97	FALSE
ENSG00000127838	PNKD	4.02335		3.71435	4.40325	385	FALSE
ENSG00000258315	C17orf49	4.02035			4.02035		FALSE
ENSG00000214612	RPS19P1	4.0189					FALSE
ENSG00000127184	COX7C	4.0184	4.18625	4.65605	2.9044	63	TRUE
ENSG00000117410	ATP6V0B	4.0143	3.89965	3.50755	4.53295	205	FALSE
ENSG00000137880	GCHFR	4.01225	2.347	4.22645	4.73895	84	FALSE
ENSG00000172366	FAM195A	4.00745	2.7412	4.20315	4.4868	160	TRUE
ENSG00000105193	RPS16	3.999	3.83075	4.00925	4.40055	146	FALSE
ENSG00000104883	PEX11G	3.9982		3.72645		241	FALSE
ENSG00000188186	LAMTOR4	3.99505	4.56095	3.6921	4.4036	99	FALSE
ENSG00000250479	CHCHD10	3.99035	2.6676	4.13685	4.84695	142	TRUE
ENSG00000063177	RPL18	3.98995	1.76285	4.168	1.931	188	FALSE
ENSG00000106803	SEC61B	3.98815	3.7368	3.99395	4.38105	96	FALSE
ENSG00000164885	CDK5	3.98065		3.5376	5.22845	292	FALSE
ENSG00000173113	TRMT112	3.97925	4.4384	3.59685	5.22515	125	FALSE
ENSG00000099795	NDUFB7	3.97075	5.24955	3.7077	6.2619	137	TRUE
ENSG00000183011	LSMD1	3.96835	1.5053	4.3603		173	FALSE
ENSG00000160539	PPAPDC3	3.96465				271	FALSE
ENSG00000184076	UQCR10	3.96165	2.9065	3.8876	4.30205	63	TRUE
ENSG00000004059	ARF5	3.9599	3.2232	4.01715	4.0655	180	TRUE
ENSG00000168894	RNF181	3.9595		4.0428		153	FALSE
ENSG00000119655	NPC2	3.9468		4.383	2.3725	151	FALSE
ENSG00000174851	YIF1A	3.94505	3.71375	4.02575	4.30085	293	FALSE
ENSG00000166681	NGFRAP1	3.93995	3.2052	3.13435	5.0567	191	FALSE
ENSG00000167468	GPX4	3.93395	2.1298	4.0705	2.82275	234	TRUE
ENSG00000179862	CITED4	3.9339				184	FALSE
ENSG00000127445	PIN1	3.92085	2.9384	3.6788	4.1152	163	FALSE
ENSG00000142507	PSMB6	3.91905		3.842	5.0872	239	FALSE
ENSG00000169567	HINT1	3.91495	4.3978	4.07405	3.05625	126	TRUE
ENSG00000203724	C1orf53	3.91115				145	FALSE
ENSG00000162244	RPL29	3.90635	4.10935	4.12005	3.07885	159	FALSE
ENSG00000162068	NTN3	3.9007		4.3102		580	FALSE
ENSG00000235587	GAPDHP65	3.8972					FALSE
ENSG00000119782	FKBP1B	3.89555	3.30685	4.00835	4.1867	108	FALSE
ENSG00000083845	RPS5	3.89225	3.7525	3.84255	5.068	204	FALSE
ENSG00000129235	TXNDC17	3.8917	4.199	3.88275	3.76565	123	FALSE
ENSG00000101439	CST3	3.89115	3.1069	3.6944	4.71875	146	FALSE
ENSG00000183978	COA3	3.8888	4.06095	3.9053	3.84045	106	TRUE
ENSG00000175602	CCDC85B	3.88675	3.31075	3.9026	4.7611	202	FALSE
ENSG00000229638	RPL4P4	3.882					FALSE
ENSG00000161677	JOSD2	3.8815	3.48995	3.8779	4.24955	188	FALSE
ENSG00000119421	NDUFA8	3.87925	3.123	3.50385	5.5256	172	TRUE
ENSG00000155368	DBI	3.87825	3.29045	2.94575	5.8727	148	TRUE
ENSG00000127774	EMC6	3.87705	3.70475	3.87395	4.5152	110	FALSE
ENSG00000111678	C12orf57	3.8742	1.73195	4.406	4.9545	126	FALSE
ENSG00000069482	GAL	3.86735	3.59935	3.97395	4.58705	123	FALSE
ENSG00000126709	IFI6	3.8659	2.8069	3.8173	4.5015	138	FALSE
ENSG00000100290	BIK	3.8646		3.8069	2.79065	160	FALSE
ENSG00000232346	SC22CB-1E7.1	3.8646					FALSE
ENSG00000184709	LRRC26	3.8646		3.64085		334	FALSE
ENSG00000109390	NDUFC1	3.83905	1.7888	4.03985	4.7596	76	TRUE
ENSG00000231500	RPS18	3.83895	3.9882	3.74115			FALSE
ENSG00000221821	C6orf226	3.838		4.18845	4.06165	101	FALSE
ENSG00000143590	EFNA3	3.8369			3.8369	238	FALSE
ENSG00000105372	RPS19	3.8365	2.849	4.1181	1.8072	145	FALSE
ENSG00000007520	TSR3	3.82025	4.33055	3.5559	4.42705	312	FALSE
ENSG00000168393	DTYMK	3.81615		3.40365	4.58985	212	TRUE
ENSG00000115457	IGFBP2	3.81465	3.2247	3.8336	4.10245	328	FALSE
ENSG00000175416	CLTB	3.8062	3.71465	3.6147	4.1142	229	FALSE
ENSG00000110492	MDK	3.8057	2.72575	3.55865	4.5202	143	FALSE
ENSG00000015475	BID	3.79685	4.77545	3.72665	3.90215	241	TRUE
ENSG00000111639	MRPL51	3.79675	2.8536	3.9076	4.882	128	TRUE
ENSG00000167815	PRDX2	3.7907	2.7351	3.33475	4.57765	198	TRUE
ENSG00000187840	EIF4EBP1	3.7815	3.14595	3.7159	3.8413	118	FALSE
ENSG00000269388	AC018755.16	3.7762					FALSE
ENSG00000185201	IFITM2	3.77615		3.06935	4.3094	132	FALSE
ENSG00000072506	HSD17B10	3.77415		3.524	5.17045	261	TRUE
ENSG00000105472	CLEC11A	3.7729		3.27035	4.43945	323	FALSE
ENSG00000170043	TRAPPC1	3.7712	3.2757	3.782	4.22595	145	FALSE
ENSG00000232888	RPS11P5	3.76985					FALSE
ENSG00000254858	MPV17L2	3.7616		3.3209	4.61245	206	TRUE
ENSG00000173915	USMG5	3.75525	2.56225	4.2331	5.53985	58	TRUE
ENSG00000116096	SPR	3.7526		3.6957	3.9467	261	TRUE
ENSG00000197582	GPX1P1	3.747					FALSE
ENSG00000116288	PARK7	3.74415	2.8319	3.7163	4.68225	189	TRUE
ENSG00000141933	TPGS1	3.73825		3.5055	4.32385	290	FALSE
ENSG00000198736	MSRB1	3.7359		4.4406	3.48495	116	FALSE
ENSG00000183648	NDUFB1	3.73525		4.7016	3.85345	105	TRUE
ENSG00000204392	LSM2	3.72965	2.99685	3.4827	5.49245		FALSE
ENSG00000100632	ERH	3.72875	3.76565	3.5736	3.8137	104	FALSE
ENSG00000100319	ZMAT5	3.7244		3.623	5.07905	170	FALSE
ENSG00000203618	GP1BB	3.72385	3.91115	3.6355	4.0404		FALSE
ENSG00000183979	NPB	3.7219				125	FALSE
ENSG00000171476	HOPX	3.7219				112	FALSE
ENSG00000198502	HLA-DRB5	3.7194		2.8972	4.1943	266	FALSE
ENSG00000172336	POP7	3.7166	3.02265	3.5331	5.3153	140	FALSE
ENSG00000100804	PSMB5	3.7143		3.5044	4.618	263	FALSE
ENSG00000128626	MRPS12	3.71355	2.05595	3.91175	4.22155	138	TRUE
ENSG00000102109	PCSK1N	3.71195	3.8584	3.64845	4.2881	260	FALSE
ENSG00000108294	PSMB3	3.7073	3.7934	3.67525	4.58855	205	FALSE
ENSG00000185608	MRPL40	3.70465	1.9646	3.57305	5.5053	206	TRUE
ENSG00000232320	AC009299.5	3.70365					FALSE
ENSG00000002330	BAD	3.7015		3.9932	4.44245	168	TRUE
ENSG00000169020	ATP5I	3.69965	3.5864	3.65915	4.0325	69	TRUE
ENSG00000177600	RPLP2	3.69835	3.75635	3.66455	4.6769	115	FALSE
ENSG00000106268	NUDT1	3.68805		3.7124	5.34625	179	FALSE
ENSG00000125611	CHCHD5	3.6869	3.5721	4.9961	2.3183	110	TRUE
ENSG00000092841	MYL6	3.6866	3.7219	3.66765	3.74285	151	FALSE
ENSG00000088992	TESC	3.6849		3.43505	3.81485	214	FALSE
ENSG00000163191	S100A11	3.6809	2.90385	3.7979	3.96025	105	FALSE
ENSG00000116586	LAMTOR2	3.6791	3.42945	3.66125	4.02235	125	FALSE
ENSG00000184983	NDUFA6	3.67765		3.9132	2.87125	154	TRUE
ENSG00000117450	PRDX1	3.67755	2.6975	3.36365	4.33825	199	FALSE
ENSG00000172354	GNB2	3.6764	2.41275	3.51325	4.93665	340	FALSE
ENSG00000137133	HINT2	3.67335	3.30685	3.5758		163	TRUE
ENSG00000219200	RNASEK	3.6732	1.1205	3.8831		137	FALSE
ENSG00000103145	HCFC1R1	3.67175	3.2149	3.9646	3.6811	138	FALSE
ENSG00000183172	SMDT1	3.67085	3.0802	4.03255	3.6911	107	TRUE
ENSG00000167799	NUDT8	3.668		3.87515		236	TRUE
ENSG00000005075	POLR2J	3.66705	1.7972	4.23085	4.06185	117	FALSE
ENSG00000130255	RPL36	3.66605	3.0063	3.81045	3.40435	105	FALSE
ENSG00000120306	CYSTM1	3.66545	2.88285	4.77525	3.83185	97	FALSE
ENSG00000099800	TIMM13	3.6625	2.4917	3.8609	3.7452	95	TRUE
ENSG00000143553	SNAPIN	3.65515		3.75595	4.51095	136	FALSE
ENSG00000107833	NPM3	3.6546		3.6477	3.61835	178	FALSE
ENSG00000133027	PEMT	3.65265	3.17535	3.2402	4.8837	236	FALSE
ENSG00000133937	GSC	3.64595				257	FALSE
ENSG00000204922	C11orf83	3.6457	3.50835	3.18765	4.21055	93	FALSE
ENSG00000129562	DAD1	3.64085		3.48955	4.189	113	FALSE
ENSG00000106367	AP1S1	3.63905		3.9384	3.54365	158	FALSE
ENSG00000224877	C17orf89	3.6316		3.70375	3.2885	74	TRUE
ENSG00000179271	GADD45GIP1	3.6295		3.58	4.02335	222	TRUE
ENSG00000176973	FAM89B	3.62145			3.62145	189	FALSE
ENSG00000124562	SNRPC	3.616		3.3335	5.4609	159	FALSE
ENSG00000128228	SDF2L1	3.6095	3.8618	3.4231	4.60245	221	FALSE
ENSG00000250317	SMIM20	3.6089			4.1047	67	FALSE
ENSG00000254999	BRK1	3.6055		3.1032	3.8671	75	FALSE
ENSG00000178449	COX14	3.60455	2.61505	3.94845	5.49715	57	TRUE
ENSG00000148450	MSRB2	3.59995		3.5929	3.3683	182	TRUE
ENSG00000111775	COX6A1	3.5999	5.0818	3.5453		109	TRUE
ENSG00000105894	PTN	3.59935				168	FALSE
ENSG00000106211	HSPB1	3.5993	3.03025	3.44165	4.03645	205	FALSE
ENSG00000165215	CLDN3	3.59615		2.8474	3.85345	220	FALSE
ENSG00000168913	ENHO	3.59605	2.9384			76	FALSE
ENSG00000063241	ISOC2	3.5959	2.772	3.51995	4.68745	221	TRUE
ENSG00000179958	DCTPP1	3.5889	2.09615	3.2595	4.1641	170	FALSE
ENSG00000130520	LSM4	3.5877	2.6285	3.09615	4.13445	139	FALSE
ENSG00000156482	RPL30	3.58665	3.61225	3.47895	5.65155	115	FALSE
ENSG00000124614	RPS10	3.58315	3.58315			165	FALSE
ENSG00000205794	RP11-333E13.4	3.58315					FALSE
ENSG00000173221	GLRX	3.5817		3.85905	3.4155	106	FALSE
ENSG00000197756	RPL37A	3.5796	3.4839	3.91735	0.77935	92	FALSE
ENSG00000241837	ATP5O	3.5776		3.59635		213	TRUE
ENSG00000170892	TSEN34	3.57635	2.96785	3.40085	4.88725	315	FALSE
ENSG00000198417	MT1F	3.5721				61	FALSE
ENSG00000149131	SERPING1	3.5721				500	FALSE
ENSG00000142168	SOD1	3.57095	2.5764	3.68145	4.2478	154	TRUE
ENSG00000135404	CD63	3.56655	2.5325	3.52375	5.85875	238	FALSE
ENSG00000105677	TMEM147	3.5643	2.64525	3.73445	4.1569	224	FALSE
ENSG00000145050	MANF	3.56365		2.86295	4.6972	182	FALSE
ENSG00000172531	PPP1CA	3.56345	2.52335	2.80625	5.02075	341	FALSE
ENSG00000130313	PGLS	3.5542	2.91115	3.15955	5.19895	258	FALSE
ENSG00000168002	POLR2G	3.5538	2.93335	2.86175	5.24555	172	FALSE
ENSG00000006016	CRLF1	3.55195		3.7441	3.8646	422	FALSE
ENSG00000165233	C9orf89	3.54895	4.28245	3.30475		183	FALSE
ENSG00000136810	TXN	3.54605	3.55005	3.55575	3.7831	105	FALSE
ENSG00000119411	BSPRY	3.5438		3.7219		402	FALSE
ENSG00000137038	TMEM261	3.54135		4.04525	2.8871	112	FALSE
ENSG00000108106	UBE2S	3.53895	3.18515	3.90955		222	FALSE
ENSG00000142684	ZNF593	3.5382	3.50305	3.53635	3.6478	134	FALSE
ENSG00000196655	TRAPPC4	3.5359		3.0864	4.29745	219	FALSE
ENSG00000185043	CIB1	3.5321		3.11085	4.574	231	FALSE
ENSG00000165264	NDUFB6	3.5313	2.8421	3.7603	3.59035	128	TRUE
ENSG00000160050	CCDC28B	3.53025	3.5144	2.81705	5.2619	200	FALSE
ENSG00000100216	TOMM22	3.5295		3.471	3.74915	142	TRUE
ENSG00000185475	TMEM179B	3.5292	4.0084	3.3708	3.8655	219	FALSE
ENSG00000103363	TCEB2	3.5285	2.88285	3.50835	4.1056	161	FALSE
ENSG00000108518	PFN1	3.52675	1.7346	3.2288	4.50385	140	FALSE
ENSG00000160932	LY6E	3.52435	2.86955	3.59465	3.6408	131	FALSE
ENSG00000187186	RP11-195F19.5	3.52335		3.5144			FALSE
ENSG00000105371	ICAM4	3.5224		3.30685		272	FALSE
ENSG00000090266	NDUFB2	3.5186	0.79835	4.00055	3.4077	105	TRUE
ENSG00000109475	RPL34	3.51595	3.4127	3.8001	2.14015	117	TRUE
ENSG00000177556	ATOX1	3.51325	1.6187	4.5362	3.2178	68	FALSE
ENSG00000173457	PPP1R14B	3.5122	3.46405	3.4459	4.18495	147	FALSE
ENSG00000221983	UBA52	3.51155	2.2485	4.0982	1.5575	128	FALSE
ENSG00000213465	ARL2	3.51		3.09705	4.0886	184	TRUE
ENSG00000223572	CKMT1A	3.5084			3.12215	417	TRUE
ENSG00000223572	CKMT1A	3.5084			3.12215	417	TRUE
ENSG00000181991	MRPS11	3.50735		2.90405	4.3902	194	TRUE
ENSG00000131188	PRR7	3.5068	3.1037	4.09465		274	FALSE
ENSG00000187051	RPS19BP1	3.5058		3.2701	3.6742	136	FALSE
ENSG00000243279	PRAF2	3.50225			3.50225	178	FALSE
ENSG00000131187	F12	3.4992		3.3297		615	FALSE
ENSG00000099624	ATP5D	3.49825	2.67665	3.615	4.1117	168	TRUE
ENSG00000197019	SERTAD1	3.4935		3.9915	3.02235	236	FALSE
ENSG00000197982	C1orf122	3.4925	2.3814	3.5043	4.6661	110	FALSE
ENSG00000177954	RPS27	3.49215	3.47525	3.6508		84	FALSE
ENSG00000103152	MPG	3.48975	2.331	3.7509		298	FALSE
ENSG00000110700	RPS13	3.4868	2.91115	3.51585		151	FALSE
ENSG00000126458	RRAS	3.4837		2.85345	3.5496	218	FALSE
ENSG00000111669	TPI1	3.4789	0.5417	3.36125	4.06635	286	TRUE
ENSG00000167645	YIF1B	3.47305		3.31365	4.2487	314	FALSE
ENSG00000105696	TMEM59L	3.4689		2.4935	4.9146	342	FALSE
ENSG00000173156	RHOD	3.46785				210	FALSE
ENSG00000174021	GNG5	3.4673	2.47345	3.25925	5.10915	68	TRUE
ENSG00000125652	ALKBH7	3.46625		3.6255		221	TRUE
ENSG00000148290	SURF1	3.46575		3.33895	4.64845	300	TRUE
ENSG00000159377	PSMB4	3.4611	3.0084	3.3382	5.0645	264	FALSE
ENSG00000132963	POMP	3.456	2.99815	3.886	2.81185	141	FALSE
ENSG00000180096	2019-09-01	3.4549			3.62555	414	FALSE
ENSG00000111843	TMEM14C	3.4545	3.55895	3.4865	3.39415	112	TRUE
ENSG00000008018	PSMB1	3.44845	2.344	3.2297	6.5861	241	FALSE
ENSG00000134248	LAMTOR5	3.44445	0.63695	3.99945	3.706	173	FALSE
ENSG00000163923	RPL39L	3.4434	3.3344			51	FALSE
ENSG00000131475	VPS25	3.44245		2.6169	4.0654	176	FALSE
ENSG00000100138	NHP2L1	3.43705	2.8389	3.36825	3.6587	128	FALSE
ENSG00000131116	ZNF428	3.43635	3.0974	3.51505	3.7377	188	FALSE
ENSG00000233493	TMEM238	3.4362				176	FALSE
ENSG00000105258	POLR2I	3.4354	4.3423	3.16755	4.0351	125	FALSE
ENSG00000176101	SSNA1	3.43385	2.8331	2.7762	4.06785	119	FALSE
ENSG00000197696	NMB	3.432	2.4837	3.99845		154	FALSE
ENSG00000124733	MEA1	3.4316	2.50835	3.12885	4.2303	185	FALSE
ENSG00000204308	RNF5	3.42985		3.97055	3.1202		FALSE
ENSG00000230778	ANKRD63	3.4181		3.4181		380	FALSE
ENSG00000160446	ZDHHC12	3.4145	3.17535	3.2156	4.58925	267	FALSE
ENSG00000177674	AGTRAP	3.41425	3.1459	3.13275	4.1211	159	FALSE
ENSG00000132329	RAMP1	3.4051		3.0886	3.58315	148	FALSE
ENSG00000188026	RILPL1	3.40275	4.66915	0.72735	1.6297	403	FALSE
ENSG00000090971	NAT14	3.3979	3.2774	3.6341	3.1365	206	FALSE
ENSG00000090263	MRPS33	3.39745	2.27965	3.22195	4.33825	106	TRUE
ENSG00000176912	C18orf56	3.3937		3.58825	3.12145	123	FALSE
ENSG00000172301	COPRS	3.39325	2.7122	3.35395	3.7966	184	FALSE
ENSG00000116221	MRPL37	3.3892	3.38095	2.9357	4.37395	423	TRUE
ENSG00000181610	MRPS23	3.3876		3.2031	4.4791	190	TRUE
ENSG00000172757	CFL1	3.385	1.7101	2.8754	4.00955	166	FALSE
ENSG00000126247	CAPNS1	3.3847	2.9151	3.41645	3.4093	268	FALSE
ENSG00000160563	MED27	3.38095		3.5097	3.25055	311	FALSE
ENSG00000166823	MESP1	3.38015		3.2171	3.89805	268	FALSE
ENSG00000175756	AURKAIP1	3.37865	2.7793	3.4551	4.90895	199	TRUE
ENSG00000198356	ASNA1	3.37645		2.86165	5.2534	348	FALSE
ENSG00000175793	SFN	3.37565			2.9019	248	FALSE
ENSG00000103254	FAM173A	3.3727	3.0144	3.369	4.3646	235	FALSE
ENSG00000242372	EIF6	3.36995	2.39875	2.63465	4.2397	245	FALSE
ENSG00000185187	SIGIRR	3.36645		3.3746	3.9961	410	FALSE
ENSG00000182909	LENG9	3.3646				501	FALSE
ENSG00000114956	DGUOK	3.36035		3.25385	3.6621	277	TRUE
ENSG00000214756	METTL12	3.35345				240	FALSE
ENSG00000085662	AKR1B1	3.35205	2.30545	2.85025	4.179	316	FALSE
ENSG00000185825	BCAP31	3.35035	2.50595	2.79405	3.9546	313	FALSE
ENSG00000164258	NDUFS4	3.3404		3.0182	4.54385	175	TRUE
ENSG00000125656	CLPP	3.3393		3.1058	5.97065	277	TRUE
ENSG00000189159	HN1	3.3372	2.27215	3.919	3.1584	181	FALSE
ENSG00000164713	BRI3	3.3363	3.4913	3.6843	2.96	125	FALSE
ENSG00000196507	TCEAL3	3.329			3.70365	200	FALSE
ENSG00000169189	NSMCE1	3.3287	2.96785	3.1877	3.89245	266	FALSE
ENSG00000124243	BCAS4	3.3272		3.00145	3.8148	211	FALSE
ENSG00000079462	PAFAH1B3	3.3272	2.3118	3.8313	3.96785	231	FALSE
ENSG00000114023	FAM162A	3.3267	3.4516	4.19745	2.34585	154	TRUE
ENSG00000184840	TMED9	3.32595		2.60455	3.85455	235	FALSE
ENSG00000170889	RPS9	3.3259	3.6395	3.63275	1.84245	194	FALSE
ENSG00000169021	UQCRFS1	3.3257		3.19975	4.02035	274	TRUE
ENSG00000213221	DNLZ	3.3231		4.16735	2.58295		FALSE
ENSG00000132507	EIF5A	3.32255	2.58315	3.0112	3.59605	184	FALSE
ENSG00000116670	MAD2L2	3.32195	2.88045	2.67855	4.41745	211	FALSE
ENSG00000118680	MYL12B	3.3201	2.6292	3.0849	3.98815	172	FALSE
ENSG00000077348	EXOSC5	3.3193		3.12575	3.9139	235	FALSE
ENSG00000167136	ENDOG	3.31865	3.06245	3.42895		297	TRUE
ENSG00000123144	C19orf43	3.31575	3.02325	3.4085	3.2445	176	FALSE
ENSG00000176387	HSD11B2	3.3148		2.84205		405	FALSE
ENSG00000231684	RP11-416K24.2	3.3148					FALSE
ENSG00000115541	HSPE1	3.31345	3.31345			102	TRUE
ENSG00000147889	CDKN2A	3.31225	1.7894	3.662	2.98825	167	FALSE
ENSG00000178741	COX5A	3.3097	2.65315	3.5002	2.4274	150	TRUE
ENSG00000130005	GAMT	3.29955	2.00835	3.3982	3.5658	269	FALSE
ENSG00000204525	HLA-C	3.2969		2.82645	4.27715	366	FALSE
ENSG00000163344	PMVK	3.2903	2.84585	3.1051	3.8176	192	FALSE
ENSG00000101220	C20orf27	3.2894	2.50315	3.52545	3.57255	199	FALSE
ENSG00000172889	EGFL7	3.28825	3.0721	3.1292	3.7558	273	FALSE
ENSG00000161016	RPL8	3.28795	2.8498	3.30505		257	FALSE
ENSG00000174547	MRPL11	3.2844	2.5534	3.35945	4.2219	192	TRUE
ENSG00000130429	ARPC1B	3.28295		2.8955	5.1104	372	FALSE
ENSG00000163382	APOA1BP	3.2788	2.71685	3.35525	3.5395	288	TRUE
ENSG00000167552	TUBA1A	3.2781	2.04385	2.91875	6.01215	451	FALSE
ENSG00000182809	CRIP2	3.2762			3.19435	282	FALSE
ENSG00000170430	MGMT	3.2749		3.7893		238	FALSE
ENSG00000106245	BUD31	3.2729	2.14925	3.2454	4.5565	144	FALSE
ENSG00000198858	R3HDM4	3.2684	4.30685	3.03415	3.3447	268	FALSE
ENSG00000165475	CRYL1	3.26775		2.8122		319	FALSE
ENSG00000108961	RANGRF	3.26615		3.15355	3.80445	186	FALSE
ENSG00000131469	RPL27	3.2613	1.2401	3.48715	4.28245	136	FALSE
ENSG00000169692	AGPAT2	3.25875	3.4774	3.0023	3.75155	278	FALSE
ENSG00000065057	NTHL1	3.2584		3.04125	4.34555	312	TRUE
ENSG00000230055	CISD3	3.2545		4.0774	2.59885	127	TRUE
ENSG00000183010	PYCR1	3.2531		3.1534	4.0094	346	TRUE
ENSG00000105254	TBCB	3.2527	2.46005	3.2474	3.7853	244	FALSE
ENSG00000184221	OLIG1	3.25135		3.05815	3.5721	271	FALSE
ENSG00000188243	COMMD6	3.24845		3.81135		98	FALSE
ENSG00000136930	PSMB7	3.2472		2.85355	4.25865	277	FALSE
ENSG00000171130	ATP6V0E2	3.24685		3.3818	3.16755	213	FALSE
ENSG00000115350	POLE4	3.24455		2.9415	3.4596	117	FALSE
ENSG00000005448	WDR54	3.2441		3.1187		334	FALSE
ENSG00000129535	NRL	3.24265				237	FALSE
ENSG00000089220	PEBP1	3.24175	2.2305	3.26355	3.63905	187	FALSE
ENSG00000170315	UBB	3.2416	2.73955	2.9956	5.06155	229	FALSE
ENSG00000229117	RPL41	3.23995	2.8337	3.29855	4.38105	25	FALSE
ENSG00000147400	CETN2	3.23985		3.20365	3.4036	172	FALSE
ENSG00000104823	ECH1	3.2366		3.1964	3.54385	328	TRUE
ENSG00000158710	TAGLN2	3.2361	2.1286	3.1433	3.3366	220	FALSE
ENSG00000135624	CCT7	3.23045	2.7159	3.00155	5.18965	543	TRUE
ENSG00000178952	TUFM	3.2289	2.22785	2.79655	5.43115	455	TRUE
ENSG00000172809	RPL38	3.2271	3.3204	3.24045	1.0975	70	FALSE
ENSG00000004779	NDUFAB1	3.226		3.43535	4.03665	156	TRUE
ENSG00000106992	AK1	3.22465	1.41115	3.43725	3.5549	194	FALSE
ENSG00000139180	NDUFA9	3.22455		3.4716	2.67765	377	TRUE
ENSG00000086504	MRPL28	3.2223		2.81975	4.0724	256	TRUE
ENSG00000139343	SNRPF	3.2194	3.07805	4.10915	1.57375	86	FALSE
ENSG00000185088	RPS27L	3.2185	3.51935	3.426	2.3918	84	FALSE
ENSG00000127922	SHFM1	3.21485	2.6977	3.29095	3.4121	70	FALSE
ENSG00000137818	RPLP1	3.21435	2.87145	3.80145		114	FALSE
ENSG00000161671	EMC10	3.2139	1.9077	3.08465	3.54215	262	FALSE
ENSG00000168061	SAC3D1	3.21285		3.15465	4.4915	358	FALSE
ENSG00000213719	CLIC1	3.2124	2.35265	3.41635	4.4157		FALSE
ENSG00000147955	SIGMAR1	3.2123	3.1689	3.3523	3.045	223	FALSE
ENSG00000127920	GNG11	3.2103	3.1167	3.0758	3.51435	73	FALSE
ENSG00000187013	C17orf82	3.20895			2.5144	251	FALSE
ENSG00000246705	H2AFJ	3.2088		3.7234	2.56095	129	FALSE
ENSG00000179091	CYC1	3.20795	3.9467	2.8478	4.8519	325	TRUE
ENSG00000101608	MYL12A	3.20685	1.7584	3.3689	3.8646	171	FALSE
ENSG00000172586	CHCHD1	3.2059	3.6047	3.09805	3.25715	118	TRUE
ENSG00000178057	NDUFAF3	3.20555	2.6943	3.43815	2.70365	184	TRUE
ENSG00000055950	MRPL43	3.20485		3.40025	2.89245	235	TRUE
ENSG00000145022	TCTA	3.2045		4.54885	2.73085	103	FALSE
ENSG00000010256	UQCRC1	3.19925		3.06255	4.16455	480	TRUE
ENSG00000068001	HYAL2	3.19865	3.03025	3.0559	4.7741	473	FALSE
ENSG00000105202	FBL	3.19715	2.7399	3.1719	3.8646	321	FALSE
ENSG00000164967	RPP25L	3.1967	2.13135	2.94075	4.89185	163	FALSE
ENSG00000034713	GABARAPL2	3.19455	3.277	3.11255	3.2213	117	FALSE
ENSG00000104147	OIP5	3.193		2.9774	3.87415	229	FALSE
ENSG00000169230	PRELID1	3.19275	2.821	3.3881	4.2363	219	TRUE
ENSG00000232112	TMA7	3.1888	3.3915	2.80215	4.05385	64	FALSE
ENSG00000127884	ECHS1	3.1875		2.75555	3.56595	290	TRUE
ENSG00000110711	AIP	3.1863		2.9464	3.7909	330	FALSE
ENSG00000204568	MRPS18B	3.1858		2.86345	3.6693		FALSE
ENSG00000110955	ATP5B	3.1843		2.9952	4.67315	529	TRUE
ENSG00000137288	UQCC2	3.18415		3.8359	1.9781	126	TRUE
ENSG00000154518	ATP5G3	3.18385	2.4866	3.6832	3.2197	142	TRUE
ENSG00000196126	HLA-DRB1	3.1828		2.4824	4.1301	266	FALSE
ENSG00000184897	H1FX	3.1817	2.0877	3.3159	3.8861	213	FALSE
ENSG00000114902	SPCS1	3.18105		2.7016	4.7481	169	FALSE
ENSG00000180879	SSR4	3.17805	2.63415	3.0694	4.0712	184	FALSE
ENSG00000175868	CALCB	3.1778				127	FALSE
ENSG00000133134	BEX2	3.17725		3.43615	3.7571	160	FALSE
ENSG00000130731	C16orf13	3.1743		3.08885	4.1896	205	FALSE
ENSG00000164081	TEX264	3.1739	1.4608	3.33995	5.49005	313	FALSE
ENSG00000135617	PRADC1	3.17245		3.33095	2.9362	188	FALSE
ENSG00000167797	CDK2AP2	3.16915	2.13825	3.5144	3.30405	126	FALSE
ENSG00000149925	ALDOA	3.1685	2.0357	2.8965	4.26605	418	FALSE
ENSG00000104904	OAZ1	3.1665	2.94835	3.10065	3.5295	228	FALSE
ENSG00000140365	COMMD4	3.1644		2.72255	4.04385	199	FALSE
ENSG00000141349	G6PC3	3.16305	3.54885	2.8656	3.8526	346	FALSE
ENSG00000123349	PFDN5	3.16235		2.5001	5.17985	154	FALSE
ENSG00000240652	RP11-832N8.1	3.1608					FALSE
ENSG00000142676	RPL11	3.1607		3.4171	0.24065	178	FALSE
ENSG00000161980	POLR3K	3.1585	3.58315	3.2219	3.00875	108	FALSE
ENSG00000146701	MDH2	3.15795	2.8834	3.06295	3.83765	338	TRUE
ENSG00000159720	ATP6V0D1	3.15565		2.4926	3.9249	351	FALSE
ENSG00000204220	PFDN6	3.1538	2.12325	3.71295	2.6985	129	FALSE
ENSG00000142534	RPS11	3.15365	2.71265	3.1085	4.1995	158	FALSE
ENSG00000125931	CITED1	3.1509		3.56095		219	FALSE
ENSG00000158747	NBL1	3.1502			3.1502	216	FALSE
ENSG00000158747	NBL1	3.1502			3.1502	195	FALSE
ENSG00000169689	STRA13	3.1485		2.8222	3.57415	81	FALSE
ENSG00000182195	LDOC1	3.14815	3.1459	2.8217	3.3762	146	FALSE
ENSG00000134864	GGACT	3.1479		2.38285		153	FALSE
ENSG00000090013	BLVRB	3.1467		3.2226		206	FALSE
ENSG00000135929	CYP27A1	3.14595				531	TRUE
ENSG00000219438	FAM19A5	3.1459	3.4516	3.17215		132	FALSE
ENSG00000167775	CD320	3.14515	3.0576	2.94555	4.0851	282	FALSE
ENSG00000138629	UBL7	3.14015	1.9549	3.0932	5.2922	420	FALSE
ENSG00000183684	ALYREF	3.133	3.1047	2.71625	3.74685	264	FALSE
ENSG00000197746	PSAP	3.13195	2.90185	2.0646	3.91895	527	FALSE
ENSG00000175550	DRAP1	3.1313	3.4516	2.92945	4.9181	205	FALSE
ENSG00000177374	HIC1	3.1306	3.98215	2.2467		733	FALSE
ENSG00000175183	CSRP2	3.1295	2.30765	3.25345	4.3553	193	FALSE
ENSG00000198715	C1orf85	3.1281		2.828	3.88685	406	FALSE
ENSG00000158042	MRPL17	3.12765	3.4516	3.77755	2.196	175	TRUE
ENSG00000166557	TMED3	3.12655	2.55975	3.0318	3.5624	217	FALSE
ENSG00000142530	FAM71E1	3.1259		4.06935	3.25715	231	FALSE
ENSG00000214114	MYCBP	3.1256			3.1256	103	FALSE
ENSG00000130312	MRPL34	3.1215		3.1851	3.14145	92	TRUE
ENSG00000099817	POLR2E	3.12065		2.7779	3.3566	210	FALSE
ENSG00000143443	C1orf56	3.1167		2.70365		341	FALSE
ENSG00000251705	RNA5-8SP6	3.1167					FALSE
ENSG00000167085	PHB	3.1161	2.74265	3.10195	3.23045	272	TRUE
ENSG00000250982	RP11-159J3.1	3.1152					FALSE
ENSG00000085117	CD82	3.1152			3.3122	267	FALSE
ENSG00000065518	NDUFB4	3.1146	2.8484	3.26745		129	TRUE
ENSG00000100028	SNRPD3	3.11455	2.59735	3.4664	3.1374	126	FALSE
ENSG00000108479	GALK1	3.11395		3.0157	4.0904	392	FALSE
ENSG00000133265	HSPBP1	3.1121	2.10405	2.97125	3.90505	359	FALSE
ENSG00000230989	HSBP1	3.1075	4.13835	3.32985	2.96775	76	FALSE
ENSG00000100271	TTLL1	3.1047				423	FALSE
ENSG00000213246	SUPT4H1	3.10255	2.2527	3.2594	3.2189	117	FALSE
ENSG00000177105	RHOG	3.10215	1.7219	3.27965	3.4136	191	FALSE
ENSG00000131100	ATP6V1E1	3.10165	2.09995	2.70085	3.5172	226	FALSE
ENSG00000172590	MRPL52	3.10145	2.7467	3.6399	1.9868	123	TRUE
ENSG00000102898	NUTF2	3.1008	2.61555	3.4297	3.1851	127	FALSE
ENSG00000172409	CLP1	3.09995		3.5144		425	FALSE
ENSG00000185519	FAM131C	3.09935				280	FALSE
ENSG00000167157	PRRX2	3.09935				253	FALSE
ENSG00000021300	PLEKHB1	3.0982			2.7299	243	FALSE
ENSG00000071553	ATP6AP1	3.09765	3.26135	2.47375	3.86135	470	FALSE
ENSG00000105767	CADM4	3.0976	3.2441	2.3756	4.0828	388	FALSE
ENSG00000125877	ITPA	3.09645		2.4459	3.7765	194	FALSE
ENSG00000113732	ATP6V0E1	3.0963	3.70645	3.3044	2.9419	81	FALSE
ENSG00000182575	NXPH3	3.09615				252	FALSE
ENSG00000074071	MRPS34	3.0923	3.6191	2.6023	4.41525	218	TRUE
ENSG00000173141	MRP63	3.0915	3.08315	4.18435	2.1757	102	TRUE
ENSG00000105755	ETHE1	3.08995		2.57665	4.75715	254	TRUE
ENSG00000100142	POLR2F	3.0896	3.5997	3.34775	1.8139	127	FALSE
ENSG00000170296	GABARAP	3.0873	1.74595	2.79835	3.5402	117	FALSE
ENSG00000126756	UXT	3.08715		3.0653	3.4549	169	FALSE
ENSG00000125971	DYNLRB1	3.0843		2.7943	3.40415	103	FALSE
ENSG00000137463	MGARP	3.08315				240	TRUE
ENSG00000109113	RAB34	3.08005	2.92735	2.87665	3.98555	316	FALSE
ENSG00000125726	CD70	3.08005		2.69435		193	FALSE
ENSG00000109113	RAB34	3.08005	2.92735	2.87665	3.98555	198	FALSE
ENSG00000166794	PPIB	3.07465	1.8614	2.4213	4.24275	216	FALSE
ENSG00000007080	CCDC124	3.07415		2.7968	3.69285	223	FALSE
ENSG00000179344	HLA-DQB1	3.0699		2.55855	4.74685	269	FALSE
ENSG00000104889	RNASEH2A	3.0689	2.16175	3.0221	4.1961	299	FALSE
ENSG00000166562	SEC11C	3.0653	3.60555	2.8281	4.31485	192	FALSE
ENSG00000107175	CREB3	3.06155	2.91115	3.15925	2.9112	371	FALSE
ENSG00000107014	RLN2	3.06095				185	FALSE
ENSG00000143575	HAX1	3.0604	2.06095	2.97245	4.6901	279	FALSE
ENSG00000214253	FIS1	3.0599	2.11185	3.296	1.35345	152	TRUE
ENSG00000037241	RPL26L1	3.05905	2.7219	2.4803	5.30435	145	FALSE
ENSG00000102119	EMD	3.058	2.43215	2.91165	3.87035	254	FALSE
ENSG00000104976	SNAPC2	3.0575		2.9816	3.25715	334	FALSE
ENSG00000172270	BSG	3.0555	3.01635	2.4519	3.6288	385	FALSE
ENSG00000206503	HLA-A	3.0548		2.48465	3.86365	365	FALSE
ENSG00000182004	SNRPE	3.05455	2.60115	2.1629	4.0151	92	FALSE
ENSG00000166347	CYB5A	3.05365	3.5306	3.50685	2.0496	134	TRUE
ENSG00000143314	MRPL24	3.0459	2.0168	3.133	4.89715	216	TRUE
ENSG00000110651	CD81	3.0446	2.21695	2.7724	3.75545	236	FALSE
ENSG00000102316	MAGED2	3.0439		2.90775	3.79375	606	FALSE
ENSG00000198856	OSTC	3.03985		3.42665	2.8646	171	FALSE
ENSG00000112306	RPS12	3.0392	3.52235	2.64195		132	FALSE
ENSG00000167900	TK1	3.03855	2.02035	2.29915	3.55895	234	FALSE
ENSG00000166710	B2M	3.03715	3.76135	3.4327	2.7007	119	FALSE
ENSG00000163479	SSR2	3.03595		2.6441	3.47865	183	FALSE
ENSG00000096080	MRPS18A	3.03435		2.44625	3.6849	196	TRUE
ENSG00000136942	RPL35	3.0334	4.07655	2.9401	3.9958	123	FALSE
ENSG00000105669	COPE	3.0325	3.0818	2.8866	4.0528	308	FALSE
ENSG00000146540	C7orf50	3.02895	1.4352	2.87845	3.32055	194	FALSE
ENSG00000123975	CKS2	3.02715	2.7614	2.55875	3.983	79	FALSE
ENSG00000164897	TMUB1	3.02715	2.15315	2.9962	3.50275	246	FALSE
ENSG00000143947	RPS27A	3.0269	2.34075	3.15385		156	FALSE
ENSG00000197747	S100A10	3.0256	2.1256	3.7767	4.07215	97	FALSE
ENSG00000115286	NDUFS7	3.02435		3.69185	2.4253	213	TRUE
ENSG00000051523	CYBA	3.02435	2.84055	3.193	2.26635	195	FALSE
ENSG00000126453	BCL2L12	3.02275		2.8628	4.16055	334	FALSE
ENSG00000159685	CHCHD6	3.0218	3.32115	2.7738	4.0564	235	TRUE
ENSG00000126254	RBM42	3.01945	2.53475	2.85505	4.87565	480	FALSE
ENSG00000110536	PTPMT1	3.01735	3.4689	3.1916	2.32085	201	TRUE
ENSG00000158246	FAM46B	3.0144				425	FALSE
ENSG00000171202	TMEM126A	3.0144		3.6943		195	TRUE
ENSG00000196205	EEF1A1P5	3.0144					FALSE
ENSG00000109099	PMP22	3.0127		2.6441	3.86665	160	FALSE
ENSG00000182718	ANXA2	3.0113	1.2857	2.5232	3.8708	357	FALSE
ENSG00000107859	PITX3	3.00835		3.02035		302	FALSE
ENSG00000142669	SH3BGRL3	3.0074	1.48825	2.99335	3.63885	93	FALSE
ENSG00000065268	WDR18	3.0048		2.77425	3.96525	432	FALSE
ENSG00000066379	ZNRD1	3.0046	3.8646	2.3331	4.20365	126	FALSE
ENSG00000178531	CTXN1	3.0037	3.44375	2.42905	3.17035	82	FALSE
ENSG00000099203	TMED1	3.0034		2.59795	3.438	227	FALSE
ENSG00000110717	NDUFS8	3.00265	1.22545	3.15245	5.3553	210	TRUE
ENSG00000126106	TMEM53	3.0014		3.2934	2.9678	277	FALSE
ENSG00000175768	TOMM5	3.0006	2.6283	3.14025		92	TRUE
ENSG00000142227	EMP3	3.00035	2.80365	3.02765		163	FALSE
ENSG00000124172	ATP5E	3.00035	4.6476	2.8156	1.81775	51	TRUE
ENSG00000159210	SNF8	2.9943	4.13835	2.93095		258	FALSE
ENSG00000099341	PSMD8	2.99175		2.92255	3.4823	350	FALSE
ENSG00000161981	SNRNP25	2.99065	1.9437	3.3069	3.7342	132	FALSE
ENSG00000101363	MANBAL	2.98945	1.15315	2.9228	3.7741	85	FALSE
ENSG00000171421	MRPL36	2.98795	1.5082	3.2875	4.27685	103	TRUE
ENSG00000186998	EMID1	2.9868		2.7787	3.5144	443	FALSE
ENSG00000235863	B3GALT4	2.98495		3.0144			FALSE
ENSG00000106330	MOSPD3	2.98455	2.85345	2.94385		235	FALSE
ENSG00000130203	APOE	2.98135		2.87045	4.2762	317	FALSE
ENSG00000077312	SNRPA	2.981	1.75835	2.6578	3.9256	282	FALSE
ENSG00000173486	FKBP2	2.9797	2.2685	3.2514		142	FALSE
ENSG00000168159	RNF187	2.9797	2.95465	3.1256	2.95285	235	FALSE
ENSG00000147403	RPL10	2.9791	1.9846	3.32605		216	FALSE
ENSG00000125901	MRPS26	2.97895	2.5904	2.52885	3.77055	205	TRUE
ENSG00000116661	FBXO2	2.9774				296	FALSE
ENSG00000175334	BANF1	2.97635	2.00465	3.6328	3.18215	89	FALSE
ENSG00000188483	IER5L	2.97315		2.69245		404	FALSE
ENSG00000188229	TUBB4B	2.97045	1.69385	2.61205	4.33885	445	FALSE
ENSG00000160213	CSTB	2.9692	1.9384	2.86575	3.29285	98	FALSE
ENSG00000240342	RPS2P5	2.9689					FALSE
ENSG00000253626	EIF5AL1	2.96805		3.0144	2.96765	154	FALSE
ENSG00000008988	RPS20	2.96695	3.32985	2.6123	0.84575	142	FALSE
ENSG00000172663	TMEM134	2.9651		2.51245	4.2896	195	FALSE
ENSG00000100410	PHF5A	2.96485		3.51515	2.8323	110	FALSE
ENSG00000198576	ARC	2.96465				396	FALSE
ENSG00000129355	CDKN2D	2.9646		2.3331	3.9774	166	FALSE
ENSG00000133315	MACROD1	2.9644		3.0041	3.76845	325	TRUE
ENSG00000100075	SLC25A1	2.9631	2.53685	2.7664	3.1679	318	TRUE
ENSG00000154723	ATP5J	2.96295	2.0652	3.4294	4.00155	116	TRUE
ENSG00000125657	TNFSF9	2.96085		2.8122	3.1652	254	FALSE
ENSG00000174165	ZDHHC24	2.9606		2.8246	3.22195	284	FALSE
ENSG00000138085	ATRAID	2.9593	1.9	2.86665	4.8525	284	FALSE
ENSG00000108528	SLC25A11	2.9592	3.51255	2.56405	3.4072	314	TRUE
ENSG00000105699	LSR	2.9579		2.94195		649	FALSE
ENSG00000157593	SLC35B2	2.9567	2.4384	2.95585	3.14185	432	FALSE
ENSG00000108639	SYNGR2	2.9558		2.77	3.16195	224	FALSE
ENSG00000169714	CNBP	2.95545	2.52205	3.0014	3.11175	179	FALSE
ENSG00000107223	EDF1	2.9545	3.00835	2.38105	3.4098	148	FALSE
ENSG00000103485	QPRT	2.95365		3.1345	2.3677	297	FALSE
ENSG00000178381	ZFAND2A	2.95305	3.30685	2.9646		145	FALSE
ENSG00000125534	PPDPF	2.95225	3.002	3.08215	2.61715	114	FALSE
ENSG00000178896	EXOSC4	2.95225	2.92945	2.9316		245	FALSE
ENSG00000052344	PRSS8	2.9516				343	FALSE
ENSG00000234825	XRCC6P2	2.9516					FALSE
ENSG00000187601	MAGEH1	2.9516				219	FALSE
ENSG00000181773	GPR3	2.9516				330	FALSE
ENSG00000107874	CUEDC2	2.9478	2.79065	2.2355	4.7997	287	FALSE
ENSG00000167642	SPINT2	2.94635	3.0856	2.72865		252	FALSE
ENSG00000148834	GSTO1	2.9446	2.27965	2.993		241	TRUE
ENSG00000174903	RAB1B	2.94445	3.50835	2.587	3.02125	201	FALSE
ENSG00000130489	SCO2	2.94305	2.27445	3.188		266	TRUE
ENSG00000160404	TOR2A	2.94175		2.80565	3.07845	321	FALSE
ENSG00000188486	H2AFX	2.94165	2.85345	3.12405	2.8674	143	FALSE
ENSG00000092010	PSME1	2.9416	4.02035	2.4639	4.15865	250	FALSE
ENSG00000108641	B9D1	2.94155	2.7571	3.1397	2.62555	257	FALSE
ENSG00000234745	HLA-B	2.9405	2.8474	2.4122	4.14445		FALSE
ENSG00000143158	MPC2	2.94	4.39385	4.0144	1.64975	127	TRUE
ENSG00000254772	EEF1G	2.9387		2.96725	3.8645	437	FALSE
ENSG00000268965	AC061992.1	2.9384		2.9384			FALSE
ENSG00000167526	RPL13	2.93775	2.43295	3.1696	2.4832	211	FALSE
ENSG00000237172	B3GNT9	2.93395		2.9384		402	FALSE
ENSG00000165283	STOML2	2.93225	2.21465	2.8188	5.2571	356	TRUE
ENSG00000145247	OCIAD2	2.9302	2.2502	3.6645	4.41805	154	TRUE
ENSG00000169738	DCXR	2.9299		2.8111	4.035	244	TRUE
ENSG00000125870	SNRPB2	2.9298	1.39245	3.42715	3.20645	225	FALSE
ENSG00000118508	RAB32	2.9285	2.88285	2.4324	5.14595	225	TRUE
ENSG00000137547	MRPL15	2.92795		2.9948	2.8829	296	TRUE
ENSG00000179403	VWA1	2.92705		2.6372	3.3584	445	FALSE
ENSG00000088832	FKBP1A	2.92625	2.7213	3.5465	2.82545	108	FALSE
ENSG00000089248	ERP29	2.92525		2.51535	4.2156	261	FALSE
ENSG00000130707	ASS1	2.92415	2.24265	2.9453	4.1608	412	FALSE
ENSG00000074800	ENO1	2.92085	1.2679	2.7749	3.56395	434	FALSE
ENSG00000123179	EBPL	2.91985	3.62555	3.0878		206	FALSE
ENSG00000137100	DCTN3	2.91825		3.66145	2.2318	186	FALSE
ENSG00000139410	SDSL	2.918	1.4222	3.3404	4.0144	329	TRUE
ENSG00000166165	CKB	2.91745	1.2313	2.51875	4.7702	381	FALSE
ENSG00000104870	FCGRT	2.91485	2.6152	2.792	3.8849	365	FALSE
ENSG00000164032	H2AFZ	2.9145	1.9077	2.908	3.2938	128	FALSE
ENSG00000127837	AAMP	2.91425	1.17215	2.40415	3.82145	434	FALSE
ENSG00000159231	CBR3	2.91375	2.6912	2.9843		277	TRUE
ENSG00000143570	SLC39A1	2.913	0.9799	2.77055	3.4303	324	FALSE
ENSG00000068079	IFI35	2.91115				288	FALSE
ENSG00000159176	CSRP1	2.91085		3.12765	2.9253	193	FALSE
ENSG00000102007	PLP2	2.91075	1.55965	2.69085	3.54825	152	FALSE
ENSG00000270170	NCBP2-AS2	2.9085					FALSE
ENSG00000149923	PPP4C	2.9081	2.152	2.9753	3.43105	307	FALSE
ENSG00000141854	hsa-mir-1199	2.9077		3.4181			FALSE
ENSG00000100591	AHSA1	2.90715	1.9659	3.05665	3.1656	338	FALSE
ENSG00000182544	MFSD5	2.9062	1.5144	2.96325	4.50835	557	FALSE
ENSG00000129951	LPPR3	2.9048		2.93095		746	FALSE
ENSG00000149541	B3GAT3	2.90375		2.62895	3.6687	335	FALSE
ENSG00000117118	SDHB	2.9024		2.74525	4.81285	280	TRUE
ENSG00000100292	HMOX1	2.8993		2.4799	3.40185	288	FALSE
ENSG00000134996	OSTF1	2.8993		3.75715	2.6256	214	FALSE
ENSG00000115234	SNX17	2.89915	1.8137	2.37345	3.839	470	FALSE
ENSG00000089693	MLF2	2.89865	2.61385	2.7914	3.204	248	FALSE
ENSG00000000003	TSPAN6	2.8985		3.05645	2.84635	245	FALSE
ENSG00000128185	DGCR6L	2.8949	2.1459	2.98855	3.12145	220	FALSE
ENSG00000128311	TST	2.89475	1.7132	3.3607	5.08855	297	TRUE
ENSG00000130725	UBE2M	2.8939	1.90275	3.0524	4.13285	183	FALSE
ENSG00000147155	EBP	2.8938	2.02595	2.92055	4.2502	230	FALSE
ENSG00000100348	TXN2	2.89335	1.41115	2.54	3.28725	166	TRUE
ENSG00000140319	SRP14	2.89255	3.09935	2.71525	3.02695	136	FALSE
ENSG00000235453	TOPORS-AS1	2.8924					FALSE
ENSG00000129757	CDKN1C	2.89185		2.74265		316	FALSE
ENSG00000162517	PEF1	2.8913		3.0347	2.77765	284	FALSE
ENSG00000134291	TMEM106C	2.89065	2.22265	2.75455	3.39795	250	FALSE
ENSG00000111640	GAPDH	2.889	1.6326	2.8081	4.16795	335	TRUE
ENSG00000162585	C1orf86	2.88765		3.27135	2.282	283	FALSE
ENSG00000119705	SLIRP	2.8876		2.9166		109	TRUE
ENSG00000197766	CFD	2.886		2.92		253	FALSE
ENSG00000100902	PSMA6	2.8853	2.7309	2.58835	4.3454	246	TRUE
ENSG00000124702	KLHDC3	2.8835	1.8284	2.9322	3.40005	382	FALSE
ENSG00000114115	RBP1	2.8829				197	FALSE
ENSG00000108278	ZNHIT3	2.8817		2.313	3.49435	155	FALSE
ENSG00000117318	ID3	2.8817	4.76035	2.46375	3.14645	119	FALSE
ENSG00000162191	UBXN1	2.88	3.0506	2.85685	2.92215	312	FALSE
ENSG00000167543	TP53I13	2.87935	1.09015	3.0151	3.64235	393	FALSE
ENSG00000196465	MYL6B	2.87855	3.6047	2.82485	3.29065	208	FALSE
ENSG00000125691	RPL23	2.87625	0.0032	3.1839	0.16115	140	FALSE
ENSG00000071462	WBSCR22	2.8741		2.6193	3.4342	298	FALSE
ENSG00000158526	TSR2	2.8741		2.63455	3.0248	191	FALSE
ENSG00000054116	TRAPPC3	2.874	1.97665	2.80065	3.78005	188	FALSE
ENSG00000116521	SCAMP3	2.87165	1.67305	2.66575	5.01275	347	FALSE
ENSG00000182512	GLRX5	2.8704	3.15915	2.6041	3.70895	157	TRUE
ENSG00000117592	PRDX6	2.8686	2.15735	2.7919	3.24255	224	TRUE
ENSG00000040608	RTN4R	2.86675	3.04795	2.59935	4.0097	473	FALSE
ENSG00000159335	PTMS	2.86415	2.74965	3.1964	2.87485	102	FALSE
ENSG00000244038	DDOST	2.8618		2.68885	3.4865	456	FALSE
ENSG00000181817	LSM10	2.8614	3.57215	2.6544	2.9915	123	FALSE
ENSG00000143545	RAB13	2.8593	3.44635	3.06095	2.52575	203	FALSE
ENSG00000068697	LAPTM4A	2.859	1.8405	2.0848	4.1618	233	FALSE
ENSG00000096092	TMEM14A	2.85875	3.13835	2.9077	2.59935	99	FALSE
ENSG00000006015	C19orf60	2.8581		2.53875	4.5066	201	FALSE
ENSG00000198755	RPL10A	2.8576	3.27805	2.78975		217	TRUE
ENSG00000160256	FAM207A	2.85635		2.789	3.00945	230	FALSE
ENSG00000025772	TOMM34	2.8556		2.31545	3.22	309	TRUE
ENSG00000108344	PSMD3	2.8539	1.68585	2.61915	3.7656	534	FALSE
ENSG00000053371	AKR7A2	2.8513		2.5559	3.53615	359	TRUE
ENSG00000108830	RND2	2.8509	3.14595	3.53475	2.31305	227	FALSE
ENSG00000177971	IMP3	2.84885	2.72645	2.79435	3.02125	184	FALSE
ENSG00000117115	PADI2	2.8484				665	FALSE
ENSG00000104964	AES	2.8477	2.88305	2.45455	3.1429	264	FALSE
ENSG00000139239	RPL14P1	2.84585					FALSE
ENSG00000127561	SYNGR3	2.84585		2.5144		229	FALSE
ENSG00000268472	AP002884.2	2.84585					FALSE
ENSG00000175130	MARCKSL1	2.8447	2.0787	3.35255	2.80995	195	FALSE
ENSG00000255737	AGAP2-AS1	2.84465		2.5459	3.2571		FALSE
ENSG00000198546	ZNF511	2.84105		3.1294	2.37555	252	FALSE
ENSG00000087088	BAX	2.8409	3.0534	2.82645	2.8661	218	TRUE
ENSG00000107438	PDLIM1	2.84065	1.84245	2.6217	3.5471	329	FALSE
ENSG00000125841	NRSN2	2.8404	1.74225	2.82095	3.0763	204	FALSE
ENSG00000005022	SLC25A5	2.8386	2.03135	2.63735	4.8387	298	TRUE
ENSG00000030582	GRN	2.8373	2.17215	2.41435	4.86635	593	FALSE
ENSG00000105364	MRPL4	2.83685	2.0886	2.71905	3.5605	311	TRUE
ENSG00000256073	C21orf119	2.8355			3.56025		FALSE
ENSG00000113811	SELK	2.8352		3.1712	2.5275	94	FALSE
ENSG00000143774	GUK1	2.8349	2.35795	2.8234	3.8918	241	TRUE
ENSG00000110801	PSMD9	2.8343	3.1608	3.08515	2.4283	223	FALSE
ENSG00000007264	MATK	2.8331				508	FALSE
ENSG00000198892	SHISA4	2.829		2.5534		197	FALSE
ENSG00000141971	MVB12A	2.82825	1.4384	2.7592	3.55385	273	FALSE
ENSG00000170421	KRT8	2.8274	1.4732	2.6365	5.0067	511	FALSE
ENSG00000114383	TUSC2	2.825	2.86405	3.39805	2.35835	110	FALSE
ENSG00000133983	COX16	2.82455	3.9232	2.8417	2.1256	106	TRUE
ENSG00000175482	POLD4	2.82415	1.9549	3.29965	3.699	107	FALSE
ENSG00000090932	DLL3	2.8237		2.80085		618	FALSE
ENSG00000171135	JAGN1	2.8222	2.87965	2.64265	3.5133	183	FALSE
ENSG00000104979	C19orf53	2.8193		2.231	3.7571	99	FALSE
ENSG00000142541	RPL13A	2.8186		2.69365	3.19745	203	FALSE
ENSG00000160606	TLCD1	2.81755	2.7219	2.6386	3.5084	247	FALSE
ENSG00000135446	CDK4	2.8171	2.34955	2.6673	3.5909	303	FALSE
ENSG00000162729	IGSF8	2.81505		2.6395	3.51645	613	FALSE
ENSG00000114391	RPL24	2.81495	3.9434	2.88045	1.2847	157	FALSE
ENSG00000105290	APLP1	2.81495		2.4951	4.1861	651	FALSE
ENSG00000074319	TSG101	2.81485	3.09935	2.902	2.3331	390	FALSE
ENSG00000181019	NQO1	2.81485				274	FALSE
ENSG00000170214	ADRA1B	2.81485		2.85345		520	FALSE
ENSG00000115268	RPS15	2.8145	1.71215	2.8945	1.8262	145	FALSE
ENSG00000137267	TUBB2A	2.81445	1.9961	2.1975	4.8084	445	FALSE
ENSG00000167553	TUBA1C	2.81245	1.67325	2.8993	4.72385	449	FALSE
ENSG00000169258	GPRIN1	2.8122		2.49445	3.72285	1008	FALSE
ENSG00000143543	JTB	2.81215	2.55825	2.66205	4.4021	146	FALSE
ENSG00000100162	CENPM	2.8055	1.3015	2.69295	3.56735	180	FALSE
ENSG00000182379	NXPH4	2.8047	2.0689	2.34975	3.28375	308	FALSE
ENSG00000175573	C11orf68	2.8047		2.7885	3.00225	293	FALSE
ENSG00000161920	MED11	2.80465		2.50745	3.2724	117	FALSE
ENSG00000171314	PGAM1	2.8037	1.8225	2.6807	3.56	254	FALSE
ENSG00000123416	TUBA1B	2.80245	1.64665	2.36165	4.2952	451	FALSE
ENSG00000122694	GLIPR2	2.8		3.02035	2.61865	169	FALSE
ENSG00000213337	ANKRD39	2.79845		2.5508	4.3936	183	FALSE
ENSG00000095906	NUBP2	2.7981	1.5372	2.4324	3.56655	271	FALSE
ENSG00000105223	PLD3	2.79625	1.9174	2.4397	3.96195	490	FALSE
ENSG00000126246	IGFLR1	2.7948		3.15915		355	FALSE
ENSG00000006327	TNFRSF12A	2.79435		2.2197	4.6256	129	FALSE
ENSG00000114631	PODXL2	2.79275		2.3697	4.80335	605	FALSE
ENSG00000131669	NINJ1	2.7927		3.0758	2.99025	152	FALSE
ENSG00000116649	SRM	2.7921	2.532	2.5245	3.3943	302	FALSE
ENSG00000174775	HRAS	2.79125	2.55125	2.76125	3.07585	189	FALSE
ENSG00000164611	PTTG1	2.79075	0.9808	3.11205		202	FALSE
ENSG00000187630	DHRS4L2	2.79065				232	FALSE
ENSG00000204228	HSD17B8	2.79065		2.4549			FALSE
ENSG00000170801	HTRA3	2.79065		2.52035	4.02335	453	FALSE
ENSG00000100243	CYB5R3	2.7894	1.2597	2.3825	3.2517	334	TRUE
ENSG00000119227	PIGZ	2.7893				579	FALSE
ENSG00000170291	ELP5	2.78905	3.3682	2.9398	1.50185	316	FALSE
ENSG00000137154	RPS6	2.7864	2.8909	2.85565	0.1642	249	FALSE
ENSG00000005486	RHBDD2	2.7833	1.56095	2.33915	3.7212	364	FALSE
ENSG00000203950	FAM127B	2.7832	1.5347	2.8278	2.8686	113	FALSE
ENSG00000171462	DLK2	2.7824		2.58855		383	FALSE
ENSG00000165775	FUNDC2	2.7817	3.55815	2.0334	2.99225	189	TRUE
ENSG00000198171	DDRGK1	2.7814	2.81435	2.50585	3.66405	314	FALSE
ENSG00000167272	POP5	2.78095		2.55235	3.43205	163	FALSE
ENSG00000213123	TCTEX1D2	2.78075	2.62215			142	FALSE
ENSG00000105701	FKBP8	2.7807	1.8539	2.7986	2.98465	413	TRUE
ENSG00000126882	FAM78A	2.77965				283	FALSE
ENSG00000184163	FAM132A	2.77965				302	FALSE
ENSG00000177156	TALDO1	2.7796		2.5408	4.2441	337	FALSE
ENSG00000187118	CMC1	2.7793	3.63495	4.04195		106	TRUE
ENSG00000228300	C19orf24	2.77835	1.8709	3.0397	3.0721	132	FALSE
ENSG00000060762	MPC1	2.778	3.00685	2.73665	2.7659	109	TRUE
ENSG00000111716	LDHB	2.7761	1.482	2.53565	4.30375	334	TRUE
ENSG00000184986	TMEM121	2.7752	2.7441	2.75445	3.02395	319	FALSE
ENSG00000215021	PHB2	2.77375	2.9902	2.23965	4.0069	299	TRUE
ENSG00000161249	DMKN	2.7724		2.3139	3.71585	476	FALSE
ENSG00000184752	NDUFA12	2.7724		2.6657		145	TRUE
ENSG00000023572	GLRX2	2.76985		2.8331		165	TRUE
ENSG00000075142	SRI	2.76835	4.0496	2.8658	2.48315	198	FALSE
ENSG00000171443	ZNF524	2.76825		2.96185	4.04955	264	FALSE
ENSG00000141759	TXNL4A	2.76785	2.7212	2.97365	2.31785	142	FALSE
ENSG00000125991	ERGIC3	2.76745		2.4589	3.6682	388	FALSE
ENSG00000178719	GRINA	2.76565	2.3255	2.17945	3.8594	371	FALSE
ENSG00000117419	ERI3	2.7635	1.77875	2.02035	4.14015	337	FALSE
ENSG00000101473	ACOT8	2.7619		3.0274		319	FALSE
ENSG00000236552	RPL13AP5	2.7612					FALSE
ENSG00000145741	BTF3	2.7605	2.4529	2.8279	3.61695	206	FALSE
ENSG00000162076	FLYWCH2	2.76025	3.2752	2.4384		140	FALSE
ENSG00000140545	MFGE8	2.7601	3.0194	1.9806	3.8357	387	FALSE
ENSG00000101457	DNTTIP1	2.7555		2.3093	3.6425	329	FALSE
ENSG00000177868	CCDC23	2.7552	2.26095		2.9982	66	FALSE
ENSG00000112110	MRPL18	2.75245	3.02235	2.77795	2.62145	180	TRUE
ENSG00000130829	DUSP9	2.75175		2.7824	2.66245	384	FALSE
ENSG00000134153	EMC7	2.7513		2.7142	3.3534	242	FALSE
ENSG00000143320	CRABP2	2.7511	2.4516	2.42945	3.4678	138	FALSE
ENSG00000143256	PFDN2	2.75065		2.4873	4.71055	154	FALSE
ENSG00000006042	TMEM98	2.7481	2.30715	2.8119	2.94785	226	FALSE
ENSG00000189227	C15orf61	2.7445	2.67945	2.94675		157	TRUE
ENSG00000111229	ARPC3	2.74445	1.4823	2.77585	3.5014	178	FALSE
ENSG00000224997	AL049840.1	2.7441					FALSE
ENSG00000138297	TIMM23	2.74405		3.0144	2.7032	209	TRUE
ENSG00000179950	PUF60	2.74215		2.4604	4.50075	559	FALSE
ENSG00000105355	PLIN3	2.7418		2.47355	3.54065	434	FALSE
ENSG00000147383	NSDHL	2.73915	2.3683	2.7175	2.9307	373	FALSE
ENSG00000205927	OLIG2	2.73885		2.84585	2.6459	323	FALSE
ENSG00000110442	COMMD9	2.73865		2.23775	3.15355	198	FALSE
ENSG00000135916	ITM2C	2.73845	2.19075	2.22215	3.14475	267	FALSE
ENSG00000167700	MFSD3	2.73665	2.9283	2.68385	3.17535	412	FALSE
ENSG00000162910	MRPL55	2.73565	1.8739	3.67095	2.5189	164	TRUE
ENSG00000101400	SNTA1	2.7353		2.64635	3.2965	505	FALSE
ENSG00000187713	TMEM203	2.7347	3.3545	2.34075	2.8812	136	FALSE
ENSG00000166333	ILK	2.73435	1.53335	2.3568	5.066	452	FALSE
ENSG00000169750	RAC3	2.7336	2.1886	2.59475	3.40155	192	FALSE
ENSG00000187024	PTRH1	2.73215		3.14845	2.6721	214	TRUE
ENSG00000101210	EEF1A2	2.73165	2.05245	2.4971	3.98085	463	FALSE
ENSG00000214063	TSPAN4	2.73115	2.4608	2.2875	4.0894	238	FALSE
ENSG00000149357	LAMTOR1	2.72835	3.08315	3.03805	2.4413	161	FALSE
ENSG00000120509	PDZD11	2.7269		2.20815	3.1549	140	FALSE
ENSG00000105248	CCDC94	2.7264		2.4216	3.089	323	FALSE
ENSG00000122705	CLTA	2.72635	2.20255	2.57235	3.77525	248	FALSE
ENSG00000172500	FIBP	2.72565	2.91805	2.67345	3.91805	364	FALSE
ENSG00000124299	PEPD	2.72265		2.44895	4.4496	493	FALSE
ENSG00000130706	ADRM1	2.72215	2.2272	2.68535	3.67295	407	FALSE
ENSG00000100294	MCAT	2.72205		2.74045	2.58515	390	TRUE
ENSG00000102265	TIMP1	2.72075	2.4799	2.5471	3.598	207	FALSE
ENSG00000140323	DISP2	2.7195		2.2752		1401	FALSE
ENSG00000140511	HAPLN3	2.7182		2.20285	4.38375	360	FALSE
ENSG00000178307	TMEM11	2.7159	3.64085	2.6929	2.5745	192	TRUE
ENSG00000134056	MRPS36	2.7149	1.8756	3.1187	3.1721	103	TRUE
ENSG00000166902	MRPL16	2.7138	1.68495	2.7287	3.58815	251	TRUE
ENSG00000063854	HAGH	2.71365	2.6915	2.63045	3.06515	308	TRUE
ENSG00000105229	PIAS4	2.71265		2.32605	3.22975	510	FALSE
ENSG00000146425	DYNLT1	2.7119	0.56095	2.8484	3.53615	113	FALSE
ENSG00000129255	MPDU1	2.7119		2.74485	2.68135	247	FALSE
ENSG00000105011	ASF1B	2.71155	2.32145	2.1611	3.16955	202	FALSE
ENSG00000166311	SMPD1	2.7111		2.39395	3.9961	631	FALSE
ENSG00000099804	CDC34	2.7074	2.5746	2.2526	3.279	236	FALSE
ENSG00000185262	UBALD2	2.70675	2.1977	2.84735	3.00245	164	FALSE
ENSG00000088356	PDRG1	2.7067		1.41115	3.39905	133	FALSE
ENSG00000166337	TAF10	2.7061		2.7044	3.3829	218	FALSE
ENSG00000114942	EEF1B2	2.70475	3.81055	2.07525	2.88285	225	FALSE
ENSG00000130770	ATPIF1	2.70125	3.27965	2.73325	2.6131	106	TRUE
ENSG00000103202	NME4	2.7	2.01	2.6088	3.3725	187	TRUE
ENSG00000115884	SDC1	2.6998	1.91365	2.37085	3.0905	310	FALSE
ENSG00000163682	RPL9	2.6994	1.59925	3.22895		192	FALSE
ENSG00000169223	LMAN2	2.699		2.44865	3.5911	356	FALSE
ENSG00000168090	COPS6	2.69865		2.5113	3.82665	327	FALSE
ENSG00000083807	SLC27A5	2.69745		2.81645		690	FALSE
ENSG00000124155	PIGT	2.69645		2.29855	4.10395	578	FALSE
ENSG00000176894	PXMP2	2.6943	2.9092	2.81285		195	TRUE
ENSG00000106605	BLVRA	2.6939	1.9502	2.5919	4.3069	296	FALSE
ENSG00000097021	ACOT7	2.69265	1.2042	2.27085	4.10765	380	TRUE
ENSG00000115756	HPCAL1	2.69235	2.6256	2.00715	3.21795	193	FALSE
ENSG00000166173	LARP6	2.6923	2.65045	2.86185	2.5696	491	FALSE
ENSG00000164096	C4orf3	2.6919		3.9075	1.9982	199	FALSE
ENSG00000105438	KDELR1	2.69155	1.66235	2.8946	2.9635	212	FALSE
ENSG00000105612	DNASE2	2.6887		2.3861	3.8454	360	FALSE
ENSG00000116857	TMEM9	2.6886	1.2675	2.57805	3.2707	208	FALSE
ENSG00000072062	PRKACA	2.68675	2.7441	2.4235	2.7861	351	FALSE
ENSG00000128463	EMC4	2.68455	2.8522	2.7236	2.53025	183	FALSE
ENSG00000106399	RPA3	2.6844		2.61865	3.62555	121	FALSE
ENSG00000154582	TCEB1	2.68165	2.67535	3.1459	2.18535	112	FALSE
ENSG00000184232	OAF	2.68115	2.6822	2.4001	3.12265	273	FALSE
ENSG00000183048	SLC25A10	2.6799			2.6799	406	TRUE
ENSG00000184831	APOO	2.67985	2.87415	2.0229	4.4837	198	TRUE
ENSG00000172725	CORO1B	2.67975	1.32965	2.6249	3.06315	489	FALSE
ENSG00000154277	UCHL1	2.67945	2.9516	1.92265	4.57285	223	FALSE
ENSG00000212864	RNF208	2.6794	2.5438	2.68725	2.9982	261	FALSE
ENSG00000105197	TIMM50	2.6785		2.53185	3.36455	456	TRUE
ENSG00000269855	AC012313.1	2.67775		2.67775		329	FALSE
ENSG00000166002	SMCO4	2.67775		3.7219	3.4868	59	FALSE
ENSG00000142937	RPS8	2.6762		2.66355	4.6073	208	FALSE
ENSG00000140682	TGFB1I1	2.67535		2.22195		461	FALSE
ENSG00000147669	POLR2K	2.6737	1.92945	2.9019	2.75165	58	FALSE
ENSG00000197958	RPL12	2.6725	2.68345	2.73065		165	FALSE
ENSG00000139970	RTN1	2.67215		2.6047		776	FALSE
ENSG00000170965	PLAC1	2.67215		2.0721		212	FALSE
ENSG00000149761	NUDT22	2.67195	2.8522	2.73495		303	FALSE
ENSG00000117862	TXNDC12	2.67175	2.0534	2.58435	2.8798	172	TRUE
ENSG00000179632	MAF1	2.67085	2.45445	2.63615	2.9482	256	FALSE
ENSG00000163170	BOLA3	2.67015		2.57375		107	TRUE
ENSG00000182500	ORAI1	2.669	2.1589	2.79085	3.08585	301	FALSE
ENSG00000155876	RRAGA	2.66865	1.4181	2.61685	4.2144	313	FALSE
ENSG00000127948	POR	2.66855	1.5947	2.365	4.1134	680	FALSE
ENSG00000123131	PRDX4	2.667	2.73145	2.61365	4.14085	271	TRUE
ENSG00000134072	CAMK1	2.667	2.33315	2.4966	3.4234	370	FALSE
ENSG00000174460	ZCCHC12	2.66665	1.67215	2.72765	4.17355	402	FALSE
ENSG00000168802	CHTF8	2.66635		2.1119	3.00845	121	FALSE
ENSG00000161036	LRWD1	2.666	2.7571	2.6139	4.26565	647	FALSE
ENSG00000171863	RPS7	2.6657	2.55995	3.1538		194	FALSE
ENSG00000162300	ZFPL1	2.66525	3.2514	2.375	3.1778	310	FALSE
ENSG00000125457	MIF4GD	2.6645	2.80895	2.6311	2.8786	263	FALSE
ENSG00000133935	C14orf1	2.6639	2.4032	2.79	2.6838	140	FALSE
ENSG00000264278	RP11-162A12.2	2.6629	2.6629				FALSE
ENSG00000182199	SHMT2	2.66065	1.39025	2.24205	3.7434	504	TRUE
ENSG00000168268	NT5DC2	2.6605	2.19845	2.6747	4.26135	557	TRUE
ENSG00000234965	SHISA8	2.66035		2.66035		397	FALSE
ENSG00000164758	MED30	2.65915				178	FALSE
ENSG00000168028	RPSA	2.65915				295	FALSE
ENSG00000185627	PSMD13	2.6584		1.8913	3.69835	378	FALSE
ENSG00000167863	ATP5H	2.6581	2.6004	2.65775	2.9384	161	TRUE
ENSG00000065054	SLC9A3R2	2.6557	3.59935	2.22195	3.0936	337	FALSE
ENSG00000237190	CDKN2AIPNL	2.65445	3.5628	2.9532	2.3955	116	FALSE
ENSG00000125821	DTD1	2.65425		2.69035	3.06245	209	FALSE
ENSG00000165672	PRDX3	2.6539		2.36555	3.08875	256	TRUE
ENSG00000101160	CTSZ	2.6537	2.1256	2.4661	3.4203	303	FALSE
ENSG00000101182	PSMA7	2.65305	2.74265	2.3372	4.67925	248	FALSE
ENSG00000128309	MPST	2.65135	2.0628	2.5337	3.73325	317	TRUE
ENSG00000134917	ADAMTS8	2.64875		3.02335		889	FALSE
ENSG00000111786	SRSF9	2.64865	2.109	2.72195	3.4086	221	TRUE
ENSG00000111786	SRSF9	2.64865	2.109	2.72195	3.4086	136	TRUE
ENSG00000141522	ARHGDIA	2.648	2.4685	2.48295	2.91075	204	FALSE
ENSG00000197568	HHLA3	2.6479				121	FALSE
ENSG00000131652	THOC6	2.647	2.51505	2.63535		341	FALSE
ENSG00000105649	RAB3A	2.64595			4.1047	220	FALSE
ENSG00000182196	ARL6IP4	2.6457	2.57585	2.3679	3.4823	421	FALSE
ENSG00000170619	COMMD5	2.6453		2.2979	3.19245	224	FALSE
ENSG00000161179	YDJC	2.64475		2.584	3.0649	323	FALSE
ENSG00000174109	C16orf91	2.64455		2.7769		132	TRUE
ENSG00000088986	DYNLL1	2.6422	2.34485	2.74205	2.8313	89	FALSE
ENSG00000104325	DECR1	2.64085		2.5904		335	TRUE
ENSG00000259494	MRPL46	2.6396		2.2415	5.01585	279	TRUE
ENSG00000129103	SUMF2	2.6396		2.7355	2.41095	358	FALSE
ENSG00000162384	C1orf123	2.6396		2.0015	3.83795	160	FALSE
ENSG00000170906	NDUFA3	2.6384	3.0886	3.0467	1.2047	84	TRUE
ENSG00000101474	APMAP	2.63765		2.22385	3.2443	416	FALSE
ENSG00000104341	LAPTM4B	2.637		2.4906	2.7866	317	FALSE
ENSG00000168734	PKIG	2.63675			3.6322	76	FALSE
ENSG00000132423	COQ3	2.63565		2.75325		369	TRUE
ENSG00000004142	POLDIP2	2.63495		2.78095	2.5165	368	TRUE
ENSG00000178980	SEPW1	2.6342	3.5197	2.38005	2.6787	87	FALSE
ENSG00000158850	B4GALT3	2.6322	2.34425	2.1861	3.9817	393	FALSE
ENSG00000115944	COX7A2L	2.6318	2.61865	4.14025	2.08605	114	TRUE
ENSG00000189171	S100A13	2.63145	2.3009	2.41525	4.66935	98	FALSE
ENSG00000179965	ZNF771	2.6309	2.14085	3.1147	1.89605	317	FALSE
ENSG00000131165	CHMP1A	2.63075	2.27165	2.66375	2.6657	240	FALSE
ENSG00000171345	KRT19	2.6304	1.5904	2.2899	4.6211	400	FALSE
ENSG00000175792	RUVBL1	2.6301		2.0995	3.7871	456	FALSE
ENSG00000143612	C1orf43	2.62885	2.7537	2.50485	2.75865	253	FALSE
ENSG00000213977	TAX1BP3	2.62825	2.7907	2.7004	2.5911	124	FALSE
ENSG00000138073	PREB	2.62725	2.6525	2.43245	3.2662	417	FALSE
ENSG00000123395	C12orf44	2.62715	2.43515	2.125	3.9935	218	FALSE
ENSG00000174744	BRMS1	2.6269		2.61695	3.89045	290	FALSE
ENSG00000144867	SRPRB	2.62645		2.434	2.82185	271	FALSE
ENSG00000204822	MRPL53	2.6259	1.24555	3.1003	3.26565	112	TRUE
ENSG00000233913	CTC-575D19.1	2.6256					FALSE
ENSG00000253304	TMEM200B	2.6256		2.8683	2.3717	307	FALSE
ENSG00000104324	CPQ	2.6256		2.65915		472	FALSE
ENSG00000114353	GNAI2	2.624	1.99785	2.08945	3.13865	355	FALSE
ENSG00000117632	STMN1	2.6238	2.04775	1.9859	3.04175	174	FALSE
ENSG00000205220	PSMB10	2.623		2.87875		273	FALSE
ENSG00000071889	FAM3A	2.62295	2.608	2.13935	3.0752	244	FALSE
ENSG00000154146	NRGN	2.62025	2.4516	2.0512	2.77535	78	FALSE
ENSG00000134202	GSTM3	2.6191		2.96385	2.16955	225	FALSE
ENSG00000103024	NME3	2.61885	1.9856	2.2528	3.7025	169	TRUE
ENSG00000159228	CBR1	2.61805	1.9786	2.8102	2.8683	277	FALSE
ENSG00000115484	CCT4	2.618	2.13015	2.4592	3.82775	539	FALSE
ENSG00000117122	MFAP2	2.6179	2.3262	2.6573		183	FALSE
ENSG00000105402	NAPA	2.61685	1.06095	1.8731	3.5341	295	FALSE
ENSG00000059691	PET112	2.61425		2.2895	3.30685	557	TRUE
ENSG00000161682	FAM171A2	2.6126	3.5904	2.45095	3.00635	826	FALSE
ENSG00000143819	EPHX1	2.61215	1.6639	2.3477	4.7955	455	FALSE
ENSG00000108523	RNF167	2.6118	2.01905	2.449	4.0322	350	FALSE
ENSG00000102882	MAPK3	2.6117	0.92945	2.2949	3.31415	379	FALSE
ENSG00000100823	APEX1	2.6117	1.69935	2.4866	5.0256	318	FALSE
ENSG00000164978	NUDT2	2.61015		2.8829	2.8646	147	TRUE
ENSG00000120860	CCDC53	2.6094		2.30365		194	FALSE
ENSG00000163541	SUCLG1	2.60935		2.2323	3.99165	346	TRUE
ENSG00000178821	TMEM52	2.6089		2.3829		209	FALSE
ENSG00000070761	C16orf80	2.6088	2.69435	2.26505	2.87565	193	FALSE
ENSG00000138326	RPS24	2.60875	4.6962	2.33275	3.31645	289	FALSE
ENSG00000108176	DNAJC12	2.6068		2.14595	3.67535	198	FALSE
ENSG00000176022	B3GALT6	2.6065	2.6256	2.5698	2.6522	329	FALSE
ENSG00000177519	RPRM	2.6064	1.9754	2.699	2.84545	109	FALSE
ENSG00000139579	NABP2	2.6052	2.76335	2.3557	2.99245	211	FALSE
ENSG00000182810	DDX28	2.6051		2.3484	3.68495	540	TRUE
ENSG00000124302	CHST8	2.6047	3.4384	2.6256		424	FALSE
ENSG00000232838	PET117	2.6047					FALSE
ENSG00000177697	CD151	2.6046	1.23975	1.8954	3.8006	253	FALSE
ENSG00000167118	URM1	2.6025		2.15965	2.6997	146	FALSE
ENSG00000182118	FAM89A	2.6022	2.1807	2.69865	2.5527	184	FALSE
ENSG00000143977	SNRPG	2.6014	1.9276	3.88285	3.64085	76	FALSE
ENSG00000115685	PPP1R7	2.60125		2.3648	3.5782	360	FALSE
ENSG00000205542	TMSB4X	2.6005	1.43695	3.94435	2.58575	44	FALSE
ENSG00000165916	PSMC3	2.5999	1.1573	2.5742	5.04955	439	FALSE
ENSG00000075415	SLC25A3	2.5993	1.2932	2.6401	3.1243	362	TRUE
ENSG00000102978	POLR2C	2.59895		2.2008	2.99635	275	FALSE
ENSG00000170266	GLB1	2.5987		1.99225	5.4384	453	FALSE
ENSG00000170266	GLB1	2.5987		1.99225	5.4384	677	FALSE
ENSG00000122035	RASL11A	2.5977	3.0144	2.23265		242	FALSE
ENSG00000179933	C14orf119	2.5976	2.2422	3.17345	2.33125	140	FALSE
ENSG00000160963	COL26A1	2.59535		1.4646	4.14845	441	FALSE
ENSG00000161642	ZNF385A	2.5918		2.23295	2.9444	386	FALSE
ENSG00000179218	CALR	2.5909	1.40915	1.872	3.3321	417	FALSE
ENSG00000136908	DPM2	2.5909		2.7219	2.62575	84	FALSE
ENSG00000168439	STIP1	2.5905	2.48995	1.85465	3.44395	590	FALSE
ENSG00000160124	CCDC58	2.5904			3.8972	144	TRUE
ENSG00000181885	CLDN7	2.5893	1.65315	2.9362	3.66045	211	FALSE
ENSG00000069011	PITX1	2.5889	2.98575	2.17255	3.01095	314	FALSE
ENSG00000171813	PWWP2B	2.5861		2.3915	2.7892	590	FALSE
ENSG00000066322	ELOVL1	2.5854	1.68835	1.9741	3.6243	279	FALSE
ENSG00000147224	PRPS1	2.58525	4.1479	2.0078	2.78965	318	FALSE
ENSG00000149273	RPS3	2.5848	-0.7301	3.935	0.976	259	FALSE
ENSG00000165886	UBTD1	2.58315	1.46845	3.17535	3.5351	227	FALSE
ENSG00000179242	CDH4	2.58315				916	FALSE
ENSG00000115596	WNT6	2.58315		2.7467		365	FALSE
ENSG00000119630	PGF	2.58315		1.90185	3.05815	170	FALSE
ENSG00000215912	TTC34	2.5823		2.60985		566	FALSE
ENSG00000127399	LRRC61	2.5781	2.0496	2.8148	2.97475	259	FALSE
ENSG00000108561	C1QBP	2.5778	2.18205	2.4773	4.1208	282	TRUE
ENSG00000197061	HIST1H4C	2.57735	1.9872	2.6284	2.57975		FALSE
ENSG00000103266	STUB1	2.57725	2.3064	2.1868	3.69775	303	FALSE
ENSG00000147257	GPC3	2.5768	1.1164	2.38385	5.0675	603	FALSE
ENSG00000137285	TUBB2B	2.5761	2.13315	2.2681	3.02385	445	FALSE
ENSG00000105341	ATP5SL	2.57545		2.84545	2.4942	263	TRUE
ENSG00000105048	TNNT1	2.57465	2.59615	2.37515	3.4516	278	FALSE
ENSG00000062282	DGAT2	2.574				388	FALSE
ENSG00000069998	CECR5	2.5734		2.51105	2.9138	423	TRUE
ENSG00000102181	CD99L2	2.5728		1.9105	2.85225	272	FALSE
ENSG00000167578	RAB4B	2.5724		2.24195	2.81105	213	FALSE
ENSG00000105135	ILVBL	2.57235	1.40355	2.19105	4.7727	632	FALSE
ENSG00000187867	PALM3	2.57215		2.26095		673	FALSE
ENSG00000175203	DCTN2	2.5715	1.28075	2.03645	3.7596	406	FALSE
ENSG00000114125	RNF7	2.5699	3.12215	2.9695	1.97395	113	FALSE
ENSG00000137825	ITPKA	2.56925		2.33265	3.21055	461	FALSE
ENSG00000132581	SDF2	2.56805	1.71465	2.3119	3.63075	211	FALSE
ENSG00000198034	RPS4X	2.56775	3.78655	2.585	2.22295	263	FALSE
ENSG00000158186	MRAS	2.5677			2.8484	208	FALSE
ENSG00000129968	ABHD17A	2.5676	2.71875	2.4773	2.62855	361	FALSE
ENSG00000113758	DBN1	2.56755	1.6635	2.1988	3.64875	651	FALSE
ENSG00000117362	APH1A	2.56695	1.87455	2.4272	2.82105	265	FALSE
ENSG00000177666	PNPLA2	2.56685	2.01615	2.38195	3.7511	504	FALSE
ENSG00000179222	MAGED1	2.5665	1.35345	2.33845	4.42155	834	FALSE
ENSG00000205670	SMIM11	2.5664	2.3331	3.2219	2.9359	58	FALSE
ENSG00000064300	NGFR	2.56635			3.43615	427	FALSE
ENSG00000101255	TRIB3	2.56425	2.8646	2.08135	3.49065	358	FALSE
ENSG00000141543	EIF4A3	2.5634	1.2558	2.48805	3.66665	411	FALSE
ENSG00000188290	HES4	2.56205	2.5454	2.39045	4.0565	247	FALSE
ENSG00000125445	MRPS7	2.5614	1.2612	2.66005	3.26835	242	TRUE
ENSG00000103811	CTSH	2.56095		2.52395	3.81485	335	FALSE
ENSG00000120697	ALG5	2.5606		2.54795		324	FALSE
ENSG00000164182	NDUFAF2	2.55955	2.2467	2.5758		169	TRUE
ENSG00000151176	PLBD2	2.55915		1.75655	3.3818	589	FALSE
ENSG00000156990	RPUSD3	2.55755		2.6256	2.7042	351	TRUE
ENSG00000146109	ABT1	2.5567		2.6009	2.63315	272	FALSE
ENSG00000167515	TRAPPC2L	2.55635		2.2342	3.06285	140	FALSE
ENSG00000115758	ODC1	2.5545	2.2924	2.4051	3.24005	461	FALSE
ENSG00000172172	MRPL13	2.55275		2.11725	4.26985	178	TRUE
ENSG00000167862	ICT1	2.5521		2.0699	4.76565	206	TRUE
ENSG00000114767	RRP9	2.5509		2.47585		475	FALSE
ENSG00000167987	VPS37C	2.5508	1.72195	2.6681	2.79075	355	FALSE
ENSG00000183828	NUDT14	2.55035		2.4151		222	FALSE
ENSG00000005882	PDK2	2.5497	2.19435	2.3154	2.8136	407	TRUE
ENSG00000159111	MRPL10	2.5489		2.39465	2.7811	271	TRUE
ENSG00000101464	PIGU	2.5468		2.1725	4.6434	435	FALSE
ENSG00000107798	LIPA	2.54535		2.5398	2.65965	399	FALSE
ENSG00000173207	CKS1B	2.54465	4.3618	1.68745	2.17645	79	FALSE
ENSG00000135638	EMX1	2.5444	2.3148	2.4646	3.3756	290	FALSE
ENSG00000140307	GTF2A2	2.5431	2.41565	2.3861	3.1748	109	FALSE
ENSG00000181218	HIST3H2A	2.54245	2.56995	2.4209	3.7002	130	FALSE
ENSG00000137404	NRM	2.54155		1.9785	3.34805	268	FALSE
ENSG00000118181	RPS25	2.54145	3.70675	2.2668	3.98995	125	FALSE
ENSG00000136950	ARPC5L	2.54145	2.8732	2.29985	2.68185	153	FALSE
ENSG00000103121	CMC2	2.54125	2.59465	1.7786	3.4056	79	TRUE
ENSG00000185803	SLC52A2	2.53995	1.96725	2.6468	3.49945	445	FALSE
ENSG00000186468	RPS23	2.5392	4.73305	3.10365	0.9536	143	FALSE
ENSG00000149600	COMMD7	2.53905	2.6256	2.60105	2.6256	200	FALSE
ENSG00000160113	NR2F6	2.5385		2.39045	3.05745	404	FALSE
ENSG00000272047	GTF2H5	2.5384	4.79985	2.59995	2.00505	71	FALSE
ENSG00000140905	GCSH	2.53805		2.41485		173	TRUE
ENSG00000184900	SUMO3	2.53795	2.60465	2.65895	2.4457	141	FALSE
ENSG00000122140	MRPS2	2.5373		2.0521	3.3715	296	TRUE
ENSG00000075618	FSCN1	2.5366	2.17905	2.3403	2.80965	493	FALSE
ENSG00000167969	ECI1	2.5361	2.0397	2.57675	2.9632	302	TRUE
ENSG00000010278	CD9	2.5359	1.9334	2.465	3.40725	228	FALSE
ENSG00000084623	EIF3I	2.53565	2.85345	2.40315	3.59325	325	FALSE
ENSG00000158109	TPRG1L	2.53315		2.59245	2.81865	272	FALSE
ENSG00000170412	GPRC5C	2.53185	2.29995	1.9872	5.26565	486	FALSE
ENSG00000141750	STAC2	2.5287				411	FALSE
ENSG00000137198	GMPR	2.5267		2.25055	2.8584	345	FALSE
ENSG00000130511	SSBP4	2.5263	3.35435	1.95475	3.84555	385	FALSE
ENSG00000108786	HSD17B1	2.5244		2.2502	4.14085	328	FALSE
ENSG00000179750	APOBEC3B	2.52395		2.78075		382	FALSE
ENSG00000092621	PHGDH	2.5225	1.3771	2.38585	4.20625	533	FALSE
ENSG00000188763	FZD9	2.5201	2.1721	2.69365	2.4502	591	FALSE
ENSG00000128789	PSMG2	2.51985		2.9361		264	FALSE
ENSG00000174276	ZNHIT2	2.5198		2.47675		403	FALSE
ENSG00000128965	CHAC1	2.5194		1.85345	2.91115	264	FALSE
ENSG00000146232	NFKBIE	2.51885		2.3848		500	FALSE
ENSG00000137309	HMGA1	2.5188	2.3659	2.5042	2.64325	107	FALSE
ENSG00000173928	SWSAP1	2.5144		3.15915		229	FALSE
ENSG00000184414	RP11-44M6.3	2.5144					FALSE
ENSG00000182054	IDH2	2.51435		2.52105	2.8025	452	TRUE
ENSG00000160948	VPS28	2.5136	1.27965	2.04755	4.80835	233	FALSE
ENSG00000130159	ECSIT	2.51355		2.27635	4.0144	431	TRUE
ENSG00000136026	CKAP4	2.51225	1.57185	2.21195	3.3677	602	FALSE
ENSG00000165678	GHITM	2.5119	2.03535	3.0527	1.9157	345	TRUE
ENSG00000185896	LAMP1	2.5114	1.96435	2.1259	3.0577	417	FALSE
ENSG00000126457	PRMT1	2.51055	1.34075	2.2393	4.62685	371	FALSE
ENSG00000164054	SHISA5	2.5104		2.39245	2.55615	240	FALSE
ENSG00000104863	LIN7B	2.50935		2.4655		207	FALSE
ENSG00000165629	ATP5C1	2.50915	1.7907	2.40225	3.2723	298	TRUE
ENSG00000124762	CDKN1A	2.5089	1.46465	2.60165	2.64325	164	FALSE
ENSG00000151465	CDC123	2.5089		2.33935	3.52395	336	FALSE
ENSG00000250571	GLI4	2.50865		2.3352		376	FALSE
ENSG00000213563	C8orf82	2.50835		2.69235	2.0359	216	TRUE
ENSG00000142544	CTU1	2.5051		2.6166	2.3354	348	FALSE
ENSG00000084072	PPIE	2.5043		1.8925	3.1898	314	FALSE
ENSG00000067221	STOML1	2.50265		2.2016	3.3331	398	TRUE
ENSG00000110107	PRPF19	2.50165	1.35945	2.10005	4.21425	504	FALSE
ENSG00000257365	FNTB	2.5014			2.5014	437	FALSE
ENSG00000143321	HDGF	2.49975	2.02825	2.2293	2.68155	256	FALSE
ENSG00000101421	CHMP4B	2.4991	2.90155	1.5571	3.39365	224	FALSE
ENSG00000136490	LIMD2	2.4982	2.07875	2.1304	2.8279	127	FALSE
ENSG00000100379	KCTD17	2.49765		2.1902	2.8652	321	FALSE
ENSG00000102934	PLLP	2.4961				182	FALSE
ENSG00000159352	PSMD4	2.4955		2.3886	3.67535	377	FALSE
ENSG00000157778	PSMG3	2.4949	1.6519	2.6711	3.34065	122	FALSE
ENSG00000117305	HMGCL	2.4906		1.1481	4.78245	325	TRUE
ENSG00000158156	XKR8	2.48955	2.27745	2.34925	3.09335	395	FALSE
ENSG00000175063	UBE2C	2.4891	1.4218	2.8439	3.13105	179	FALSE
ENSG00000105568	PPP2R1A	2.4883	1.13435	2.32835	3.03515	589	FALSE
ENSG00000119383	PPP2R4	2.48785	1.2689	2.1922	2.8174	358	FALSE
ENSG00000112651	MRPL2	2.4874		2.63355		305	TRUE
ENSG00000109062	SLC9A3R1	2.4861	1.387	2.3234	3.4005	358	FALSE
ENSG00000196419	XRCC6	2.48545	0.9015	2.20885	4.27155	609	FALSE
ENSG00000134375	TIMM17A	2.48505		2.19485	3.4493	171	TRUE
ENSG00000104886	PLEKHJ1	2.48455	2.3195	2.13575	2.75935	149	FALSE
ENSG00000153551	CMTM7	2.4841		2.7711	2.21115	175	FALSE
ENSG00000165948	IFI27L1	2.4837		2.96045	3.84015	104	FALSE
ENSG00000180818	HOXC10	2.4837				342	FALSE
ENSG00000205078	SYCE1L	2.4837		3.1047		242	FALSE
ENSG00000136840	ST6GALNAC4	2.48365		2.17945	3.17535	302	FALSE
ENSG00000133740	E2F5	2.4834	2.1347	2.7397		346	FALSE
ENSG00000137161	CNPY3	2.4827	1.89035	2.1205	3.05745	278	FALSE
ENSG00000123989	CHPF	2.48265	1.92945	2.179	3.6417	775	FALSE
ENSG00000130724	CHMP2A	2.4809	1.8109	2.69285	4.18965	222	FALSE
ENSG00000164438	TLX3	2.48085		2.6459	2.42105	291	FALSE
ENSG00000077942	FBLN1	2.48035	1.8124	2.2962	3.95425	703	FALSE
ENSG00000085063	CD59	2.4795		3.23525	2.22935	128	FALSE
ENSG00000130811	EIF3G	2.47945	3.14085	2.30575	3.59155	320	FALSE
ENSG00000184436	THAP7	2.47815		2.343	4.0949	309	FALSE
ENSG00000168275	COA6	2.4779		2.50645	2.7762	125	TRUE
ENSG00000131871	VIMP	2.47325	2.2159	1.94205	3.1519	189	FALSE
ENSG00000111481	COPZ1	2.4731		2.6929	2.48745	185	FALSE
ENSG00000173786	CNP	2.47265	1.48425	2.24945	2.85225	421	FALSE
ENSG00000196449	YRDC	2.4725		2.45645	2.58975	279	FALSE
ENSG00000137563	GGH	2.47185		2.15725	3.25715	318	FALSE
ENSG00000143761	ARF1	2.47125	2.35395	2.4003	2.52335	181	FALSE
ENSG00000103187	COTL1	2.4711	1.8732	2.5144	2.78595	142	FALSE
ENSG00000085871	MGST2	2.4701	2.4774	2.4783		147	FALSE
ENSG00000108604	SMARCD2	2.46945		1.9895	2.99115	531	FALSE
ENSG00000112473	SLC39A7	2.4688	1.9826	2.171	3.18415	469	FALSE
ENSG00000184117	NIPSNAP1	2.46795		2.1515	2.86355	284	TRUE
ENSG00000116459	ATP5F1	2.46745		2.24575	2.9584	256	TRUE
ENSG00000166171	DPCD	2.4673		2.17535	3.59575	203	FALSE
ENSG00000165272	AQP3	2.46465		1.9774	3.2055	292	FALSE
ENSG00000131668	BARX1	2.46465				254	FALSE
ENSG00000183628	DGCR6	2.4646		2.7849	1.6459	220	FALSE
ENSG00000185838	GNB1L	2.4643		2.956	2.13735	327	FALSE
ENSG00000106305	AIMP2	2.46365	2.28755	2.35875	4.28655	320	FALSE
ENSG00000108298	RPL19	2.4635	1.0332	2.35015	4.0565	196	FALSE
ENSG00000175854	SWI5	2.4633		2.5899	2.19565	235	FALSE
ENSG00000214160	ALG3	2.46325		2.30005	3.62555	438	FALSE
ENSG00000158792	SPATA2L	2.46325		2.15915	3.21865	424	FALSE
ENSG00000160813	PPP1R35	2.45995	2.48495	2.4732		253	FALSE
ENSG00000156521	TYSND1	2.4594		2.58705	2.01465	566	TRUE
ENSG00000140612	SEC11A	2.45915	1.9883	2.45925	2.7219	185	FALSE
ENSG00000100417	PMM1	2.459		1.33435	3.77805	262	FALSE
ENSG00000105617	LENG1	2.45805		2.80445	1.85345	264	FALSE
ENSG00000102977	ACD	2.45765		2.4642		544	FALSE
ENSG00000210100	MT-TI	2.4571					FALSE
ENSG00000101444	AHCY	2.4545	1.31825	2.29205	2.9107	432	FALSE
ENSG00000130165	ELOF1	2.45405	-0.20205	1.6411	2.89115	83	FALSE
ENSG00000101460	MAP1LC3A	2.4527	1.71155	2.5989	2.60845	125	FALSE
ENSG00000105520	DKFZP761J1410	2.45215	2.1167	2.29685	2.9997	427	FALSE
ENSG00000100347	SAMM50	2.45215	1.6795	2.1988	4.37035	469	TRUE
ENSG00000196366	C9orf163	2.4516	2.35345	3.0144		203	FALSE
ENSG00000119333	WDR34	2.451		2.4527	2.48495	536	FALSE
ENSG00000041357	PSMA4	2.45095	1.8294	1.8789	4.31965	261	FALSE
ENSG00000137509	PRCP	2.4502		2.01325	3.20725	517	FALSE
ENSG00000103260	METRN	2.45	3.17455	2.75835	1.7456	293	FALSE
ENSG00000253368	TRNP1	2.44945	3.3972	2.52815	1.9827	227	FALSE
ENSG00000089327	FXYD5	2.4487	1.4498	2.0294	3.4806	178	FALSE
ENSG00000170604	IRF2BP1	2.4482	2.1529	2.3831	3.04445	584	FALSE
ENSG00000169241	SLC50A1	2.44785		2.3011	2.98635	221	FALSE
ENSG00000131966	ACTR10	2.44725		2.29715	2.9961	417	FALSE
ENSG00000111275	ALDH2	2.44655		2.15405	3.4549	517	TRUE
ENSG00000143252	SDHC	2.44655		2.96535	2.10125	169	TRUE
ENSG00000163931	TKT	2.44615	1.3294	2.5394	2.50945	631	TRUE
ENSG00000178982	EIF3K	2.443	2.1909	2.7807	0.56095	218	FALSE
ENSG00000102030	NAA10	2.44295	2.2431	2.4845	2.66315	235	FALSE
ENSG00000198816	ZNF358	2.4425		2.39485	3.6126	568	FALSE
ENSG00000129911	KLF16	2.44225	2.67535	2.21025	2.5139	252	FALSE
ENSG00000067704	IARS2	2.44155	3.3972	2.186	3.29855	1012	TRUE
ENSG00000244165	P2RY11	2.44075			2.44075	374	FALSE
ENSG00000169019	COMMD8	2.4406				183	FALSE
ENSG00000082515	MRPL22	2.4395		3.3957	-0.3813	206	TRUE
ENSG00000205138	SDHAF1	2.43885		3.17215	2.44475	115	TRUE
ENSG00000182511	FES	2.4384		2.25365		822	FALSE
ENSG00000110063	DCPS	2.4384		2.60405		337	FALSE
ENSG00000167925	GHDC	2.43605	1.4552	2.3793	2.7965	530	FALSE
ENSG00000156973	PDE6D	2.435	2.3272	1.4935	3.26035	150	FALSE
ENSG00000179115	FARSA	2.43465		2.10175	3.7179	508	FALSE
ENSG00000136888	ATP6V1G1	2.4339	2.597	1.87925	2.8041	118	FALSE
ENSG00000204520	MICA	2.43315		1.9133	5.05985		FALSE
ENSG00000164051	CCDC51	2.43305		2.80085	3.62555	411	TRUE
ENSG00000128245	YWHAH	2.4322	2.03045	2.2868	3.06225	246	FALSE
ENSG00000118418	HMGN3	2.43195	2.27745	2.07975	2.76985	130	FALSE
ENSG00000067225	PKM	2.4309	0.7848	2.1358	3.498	605	FALSE
ENSG00000077152	UBE2T	2.43035	2.9982	2.10595	3.5818	197	FALSE
ENSG00000109919	MTCH2	2.43025	2.37375	3.4437	0.5978	303	TRUE
ENSG00000093010	COMT	2.4302	1.9314	2.48695	2.6571	271	TRUE
ENSG00000187479	C11orf96	2.43015		2.38205		122	FALSE
ENSG00000150459	SAP18	2.4291		2.69615	2.04585	172	FALSE
ENSG00000119559	C19orf25	2.42805	1.67535	2.4425	2.5123	118	FALSE
ENSG00000183155	RABIF	2.4266		3.9587	1.58515	123	FALSE
ENSG00000163466	ARPC2	2.4254	1.4273	2.3462	3.50935	300	FALSE
ENSG00000105516	DBP	2.4244	2.41115	2.03025	3.3119	325	FALSE
ENSG00000186222	BLOC1S4	2.4215		2.08335	3.12555	217	FALSE
ENSG00000158828	PINK1	2.4214	1.70365	2.29205	4.12485	581	TRUE
ENSG00000176845	METRNL	2.42065	2.43705	2.13585	3.3972	311	FALSE
ENSG00000132481	TRIM47	2.42015		2.42755		638	FALSE
ENSG00000178096	BOLA1	2.41955		2.4417	3.0886	137	TRUE
ENSG00000101365	IDH3B	2.4189		2.1764	3.06895	385	TRUE
ENSG00000197345	MRPL21	2.4184		2.47145		205	TRUE
ENSG00000107745	MICU1	2.418		1.5841	3.1838	478	TRUE
ENSG00000122873	CISD1	2.4173	3.9982	3.39145	1.49505	108	TRUE
ENSG00000123685	BATF3	2.4151	2.10465	2.15915	3.73085	127	FALSE
ENSG00000132661	NXT1	2.4138	2.1107	2.22195	3.12555	140	FALSE
ENSG00000213619	NDUFS3	2.4133		2.5438	1.7456	264	TRUE
ENSG00000187553	CYP26C1	2.413		2.413		522	FALSE
ENSG00000157326	DHRS4	2.413		2.32065		278	TRUE
ENSG00000147382	FAM58A	2.4127	1.93545	2.42945	2.6811	248	FALSE
ENSG00000185085	INTS5	2.4121		2.3416	3.14085	1019	FALSE
ENSG00000172346	CSDC2	2.4119			2.5014	153	FALSE
ENSG00000181924	COA4	2.4119	1.03025	2.6229	3.2717	87	TRUE
ENSG00000198830	HMGN2	2.4117	2.22415	2.18305	2.92695	90	FALSE
ENSG00000106236	NPTX2	2.4116		2.63	2.5886	431	FALSE
ENSG00000260027	HOXB7	2.4115		2.2919	2.4848	217	FALSE
ENSG00000005059	CCDC109B	2.41095		2.7329		336	TRUE
ENSG00000123159	GIPC1	2.41015	0.7683	2.5549	3.2903	333	FALSE
ENSG00000011485	PPP5C	2.40965		1.77815	3.7979	499	FALSE
ENSG00000123353	ORMDL2	2.40905		3.3158	1.1608	153	FALSE
ENSG00000116035	VAX2	2.40905		2.26845		290	FALSE
ENSG00000110104	CCDC86	2.4088		2.1745	2.7219	360	FALSE
ENSG00000157782	CABP1	2.40855		2.8331		370	FALSE
ENSG00000164733	CTSB	2.40805	1.8786	2.089	2.86085	339	FALSE
ENSG00000132471	WBP2	2.4072		2.2268	2.535	261	FALSE
ENSG00000162430	SEPN1	2.407	1.26845	1.77125	2.88755	590	FALSE
ENSG00000107796	ACTA2	2.40675	1.6807	3.26565		377	FALSE
ENSG00000196544	C17orf59	2.4067		2.076	2.9516	357	FALSE
ENSG00000163634	THOC7	2.40665		2.5721	2.08315	204	FALSE
ENSG00000176124	DLEU1	2.4065					FALSE
ENSG00000123933	MXD4	2.4056	3.31705	2.49805	2.31025	209	FALSE
ENSG00000105619	TFPT	2.4042	1.1573	2.89875		253	FALSE
ENSG00000163481	RNF25	2.4035		2.4336		459	FALSE
ENSG00000166166	TRMT61A	2.40305		2.3646	2.4431	289	FALSE
ENSG00000004478	FKBP4	2.402	1.38435	2.0921	2.92435	459	FALSE
ENSG00000168135	KCNJ4	2.40185				445	FALSE
ENSG00000215612	HMX1	2.4015	1.887	2.28205	3.34555	348	FALSE
ENSG00000105329	TGFB1	2.40075	2.13035	2.64255	2.4678	390	FALSE
ENSG00000159348	CYB5R1	2.40045		2.15515	3.0587	305	FALSE
ENSG00000116030	SUMO1	2.39835	2.33825	2.00495	2.52735	101	FALSE
ENSG00000182551	ADI1	2.3982	-1.46125	3.08765	2.89275	179	FALSE
ENSG00000167671	UBXN6	2.3979	0.6167	2.26205	3.305	441	FALSE
ENSG00000173465	SSSCA1	2.3977		2.5159	1.69245	199	FALSE
ENSG00000135047	CTSL	2.3975	0.89995	2.45255	3.82445	333	FALSE
ENSG00000136327	NKX2-8	2.3972				239	FALSE
ENSG00000243749	ZMYM6NB	2.39715		2.67535		154	FALSE
ENSG00000158864	NDUFS2	2.3969		2.22965	2.6238	463	TRUE
ENSG00000231389	HLA-DPA1	2.396		2.6467			FALSE
ENSG00000112335	SNX3	2.39545	2.08785	2.4729	2.53835	162	FALSE
ENSG00000102871	TRADD	2.3944	1.4437	3.20165	2.84585	312	FALSE
ENSG00000103275	UBE2I	2.3943	1.9537	2.37065	2.9608	158	FALSE
ENSG00000184508	HDDC3	2.39325		2.6047	2.0235	179	FALSE
ENSG00000148291	SURF2	2.39295		2.3652		256	FALSE
ENSG00000182759	MAFA	2.39245				353	FALSE
ENSG00000183291	2019-09-15	2.39185		2.5782	2.2786	165	FALSE
ENSG00000022277	RTFDC1	2.3916		1.76915	3.18375	336	FALSE
ENSG00000137207	YIPF3	2.391	1.252	2.4152	3.3881	350	FALSE
ENSG00000105671	DDX49	2.3903		1.87415	4.6711	483	FALSE
ENSG00000178035	IMPDH2	2.3894	2.75135	2.3648		514	FALSE
ENSG00000182223	ZAR1	2.38865		2.7219		424	FALSE
ENSG00000163273	NPPC	2.3886				126	FALSE
ENSG00000100412	ACO2	2.38835		1.9352	4.1618	780	TRUE
ENSG00000138029	HADHB	2.3882		2.31285	2.8509	474	TRUE
ENSG00000122592	HOXA7	2.3879		1.9384	2.6973	230	FALSE
ENSG00000030110	BAK1	2.3877		2.5023	2.51185	211	TRUE
ENSG00000078808	SDF4	2.38755	1.59915	1.99705	3.2752	362	FALSE
ENSG00000186501	TMEM222	2.3861		2.1911	2.4747	208	FALSE
ENSG00000129932	DOHH	2.3854	2.3201	2.0737	2.7777	302	FALSE
ENSG00000204316	MRPL38	2.3845	1.2362	2.2174	4.26295	380	TRUE
ENSG00000136463	TACO1	2.3838	2.073	2.1259	3.10665	297	TRUE
ENSG00000232119	MCTS1	2.3825	1.2362	1.95425	4.4359	182	FALSE
ENSG00000071626	DAZAP1	2.382	3.00985	2.09135	2.73375	407	FALSE
ENSG00000104960	PTOV1	2.38115	2.0567	2.38255	2.85185	416	FALSE
ENSG00000149806	FAU	2.38065	3.057			133	FALSE
ENSG00000157870	FAM213B	2.38045		2.37555	2.43095	246	FALSE
ENSG00000100865	CINP	2.37875		1.86005	3.14875	212	FALSE
ENSG00000100321	SYNGR1	2.37865	2.3227	2.71695	2.0674	233	FALSE
ENSG00000166997	CNPY4	2.37795		2.155	2.6459	248	FALSE
ENSG00000120885	CLU	2.3771		2.0002	3.69255	449	FALSE
ENSG00000183283	DAZAP2	2.3768		2.835	2.17245	207	FALSE
ENSG00000180304	OAZ2	2.3767	2.5749	2.70855	2.24015	189	FALSE
ENSG00000111906	HDDC2	2.3742	0.99815	2.64285	2.2206	204	FALSE
ENSG00000136867	SLC31A2	2.37415			2.67535	143	FALSE
ENSG00000023191	RNH1	2.3741	1.7514	2.4786	3.55375	461	FALSE
ENSG00000006625	GGCT	2.37265	2.66565	1.79865	2.90365	188	FALSE
ENSG00000167130	DOLPP1	2.3695		2.0235	2.55185	238	FALSE
ENSG00000125970	RALY	2.36925	1.64065	2.19365	3.84385	306	FALSE
ENSG00000137841	PLCB2	2.3683				1185	FALSE
ENSG00000170439	METTL7B	2.3683			2.8829	244	FALSE
ENSG00000168040	FADD	2.36815	2.29065	2.3574	2.57055	208	FALSE
ENSG00000131462	TUBG1	2.36775	1.83585	2.27995	3.2206	451	FALSE
ENSG00000107537	PHYH	2.3677		1.95425		338	TRUE
ENSG00000100711	ZFYVE21	2.367		2.64925	2.0251	252	FALSE
ENSG00000104825	NFKBIB	2.3646		2.29975	2.3022	356	FALSE
ENSG00000100462	PRMT5	2.36405		2.00935	4.42415	637	FALSE
ENSG00000116863	ADPRHL2	2.36195		1.9973	3.08785	363	FALSE
ENSG00000183696	UPP1	2.3617	2.39175	2.261		310	FALSE
ENSG00000117748	RPA2	2.36085	2.3331	1.59285	3.33665	270	FALSE
ENSG00000106028	SSBP1	2.3601	1.8602	2.58365	3.1519	148	TRUE
ENSG00000006638	TBXA2R	2.3589		2.1294		407	FALSE
ENSG00000204052	LRRC73	2.3584	2.4774			316	FALSE
ENSG00000132612	VPS4A	2.35775		1.8528	2.7533	437	FALSE
ENSG00000131094	C1QL1	2.35745		2.227	2.64405	258	FALSE
ENSG00000213190	MLLT11	2.357	2.06095	2.5406	2.36765	90	FALSE
ENSG00000166582	CENPV	2.3558	1.04205	2.56385	3.7606	272	FALSE
ENSG00000164853	UNCX	2.35545		2.61865		531	FALSE
ENSG00000070756	PABPC1	2.355	2.3916	2.00425	3.80625	636	FALSE
ENSG00000163453	IGFBP7	2.35385	2.1703	2.44195		282	FALSE
ENSG00000235169	SMIM1	2.35345				78	FALSE
ENSG00000127252	HRASLS	2.3534		3.0084		273	FALSE
ENSG00000166401	SERPINB8	2.3534				374	FALSE
ENSG00000130202	PVRL2	2.35285	2.56	1.9876	3.54155	538	FALSE
ENSG00000087245	MMP2	2.35265		2.27165	3.11525	660	FALSE
ENSG00000115317	HTRA2	2.3522	2.27965	2.2083	4.12555	458	TRUE
ENSG00000123143	PKN1	2.35195	2.33685	2.3558		948	FALSE
ENSG00000104524	PYCRL	2.35115		1.32125	2.8586	286	FALSE
ENSG00000150551	LYPD1	2.3508	2.0064	2.8646	2.3756	141	FALSE
ENSG00000120896	SORBS3	2.35075	1.72195	2.1625	2.8677	671	FALSE
ENSG00000108829	LRRC59	2.3507	1.9094	2.7045	2.1492	307	FALSE
ENSG00000213593	TMX2	2.34935		1.73905	3.06215	296	FALSE
ENSG00000108107	RPL28	2.3491	1.9987	3.2645	0.9949	169	FALSE
ENSG00000166407	LMO1	2.3484	2.5144			156	FALSE
ENSG00000188846	RPL14	2.3479	2.5904	2.31495	3.3756	215	FALSE
ENSG00000168394	TAP1	2.3476		2.06285	3.39775	808	FALSE
ENSG00000163754	GYG1	2.34605		2.24345	3.3683	350	FALSE
ENSG00000143368	SF3B4	2.34585		2.1631	3.25485	424	FALSE
ENSG00000131409	LRRC4B	2.3457		1.9506	4.63835	713	FALSE
ENSG00000165501	LRR1	2.3437		2.4542		414	FALSE
ENSG00000149599	DUSP15	2.34165		3.29065	3.58315	235	FALSE
ENSG00000126088	UROD	2.3408		2.2406	4.6256	367	FALSE
ENSG00000136521	NDUFB5	2.3405		3.0144	1.9181	189	TRUE
ENSG00000184164	CRELD2	2.34005	2.74225	2.127	3.39715	402	FALSE
ENSG00000163468	CCT3	2.3377	1.0375	1.8146	4.5877	545	FALSE
ENSG00000179010	MRFAP1	2.33625	2.23975	2.32635	2.367	127	FALSE
ENSG00000151640	DPYSL4	2.33515			3.8069	572	FALSE
ENSG00000126934	MAP2K2	2.3351	2.10755	2.0486	3.2857	400	FALSE
ENSG00000088826	SMOX	2.33445		1.96975	4.2571	585	FALSE
ENSG00000124541	RRP36	2.3338	3.22865	1.84115	3.01015	259	FALSE
ENSG00000173171	MTX1	2.3335		2.30685		466	TRUE
ENSG00000161921	CXCL16	2.3325	1.93685	2.7018	2.6169	273	FALSE
ENSG00000089157	RPLP0	2.33165	1.68665	2.5568	5.13265	317	FALSE
ENSG00000084754	HADHA	2.33145		1.7547	3.97555	763	TRUE
ENSG00000166133	RPUSD2	2.331		2.1994		545	FALSE
ENSG00000162444	RBP7	2.33055		2.4112		134	FALSE
ENSG00000111328	CDK2AP1	2.33045	2.46265	2.4077	2.113	115	FALSE
ENSG00000157020	SEC13	2.33	0.69845	2.2371	3.8268	368	FALSE
ENSG00000129195	FAM64A	2.32915	2.4467	2.4808	2.17215	248	FALSE
ENSG00000167536	DHRS13	2.3289	1.8933	2.08555	2.9042	377	FALSE
ENSG00000158856	DMTN	2.32785	2.3022	1.82275	2.6902	405	FALSE
ENSG00000132591	ERAL1	2.32655		2.12585	2.8498	437	TRUE
ENSG00000115468	EFHD1	2.32655	1.0904	2.3273	2.71515	239	TRUE
ENSG00000091640	SPAG7	2.3262	1.6139	1.91115	3.754	227	FALSE
ENSG00000100209	HSCB	2.32515		1.92685	3.2441	235	TRUE
ENSG00000136943	CTSV	2.325		2.6427		334	FALSE
ENSG00000117399	CDC20	2.32475	1.5857	2.3889		499	FALSE
ENSG00000130733	YIPF2	2.3231	1.9302	2.35475	2.4443	316	FALSE
ENSG00000146007	ZMAT2	2.3224		1.3913	2.97975	199	FALSE
ENSG00000198818	SFT2D1	2.32185	1.45425	3.05755	1.77615	159	FALSE
ENSG00000106628	POLD2	2.32155	1.19095	2.5081		504	FALSE
ENSG00000224051	GLTPD1	2.3189	2.50135	2.1324	2.37905	214	FALSE
ENSG00000188603	CLN3	2.31865	3.25995	2.0588	4.36995	438	FALSE
ENSG00000188010	MORN2	2.3179	2.1795			79	FALSE
ENSG00000138175	ARL3	2.3169		2.3367	2.4639	182	FALSE
ENSG00000179262	RAD23A	2.31685	1.94835	1.90625	3.3606	363	FALSE
ENSG00000159840	ZYX	2.316	1.0537	2.02315	3.54415	572	FALSE
ENSG00000148803	FUOM	2.3148				154	FALSE
ENSG00000134333	LDHA	2.3147	1.14595	2.6205	2.1422	361	FALSE
ENSG00000142546	NOSIP	2.31345		2.36945		301	FALSE
ENSG00000131148	EMC8	2.3119	2.40185	2.23225	2.36665	210	FALSE
ENSG00000165752	STK32C	2.31125		2.23745	2.47195	486	FALSE
ENSG00000204310	AGPAT1	2.31095	2.0886	2.07035	2.57665	283	FALSE
ENSG00000143106	PSMA5	2.3104	2.15785	2.4139	2.2571	241	FALSE
ENSG00000139428	MMAB	2.3103		2.20335	2.4471	250	TRUE
ENSG00000160325	CACFD1	2.309		1.3855	2.54295	233	FALSE
ENSG00000181284	TMEM102	2.30735		2.34065		508	FALSE
ENSG00000149257	SERPINH1	2.30635	0.6624	1.97455	3.33855	418	FALSE
ENSG00000101000	PROCR	2.3058		1.9328	4.38105	238	FALSE
ENSG00000182768	NGRN	2.30565	3.1657	2.6616	2.0237	291	TRUE
ENSG00000103502	CDIPT	2.3033	2.0593	1.80205	2.99555	213	FALSE
ENSG00000148335	NTMT1	2.3031	1.7203	2.81245	2.0886	223	FALSE
ENSG00000169592	INO80E	2.3027	1.1397	2.46735	3.60945	244	FALSE
ENSG00000084764	MAPRE3	2.30215	2.62215	1.40895	2.8132	281	FALSE
ENSG00000133250	ZNF414	2.30155		2.2455	2.69435	390	FALSE
ENSG00000151729	SLC25A4	2.3001	2.09615	2.4599	1.9085	298	TRUE
ENSG00000176058	TPRN	2.30005	1.39245	2.1661	3.44835	711	FALSE
ENSG00000245848	CEBPA	2.29995	1.67215	2.42505	2.4228	393	FALSE
ENSG00000011009	LYPLA2	2.29995	0.0274	2.26065	2.7089	231	FALSE
ENSG00000126749	EMG1	2.29985		2.4136	1.96465		FALSE
ENSG00000105379	ETFB	2.2995	0.71935	2.5776		346	TRUE
ENSG00000118894	FAM86A	2.29745		2.0749	2.9516	330	FALSE
ENSG00000118894	FAM86A	2.29745		2.0749	2.9516	330	FALSE
ENSG00000105640	RPL18A	2.29685	0.5702	2.9541	0.5149	176	FALSE
ENSG00000185269	NOTUM	2.2961				496	FALSE
ENSG00000186907	RTN4RL2	2.2952		2.14255	2.80365	420	FALSE
ENSG00000216490	IFI30	2.29475		2.0617	3.1047	250	FALSE
ENSG00000168101	NUDT16L1	2.2945		1.70965	2.7496	211	FALSE
ENSG00000174307	PHLDA3	2.2944	1.6382	2.48685	2.8771	127	FALSE
ENSG00000165905	GYLTL1B	2.294		2.2945		721	FALSE
ENSG00000134438	RAX	2.2939		2.25715	2.57585	346	FALSE
ENSG00000104805	NUCB1	2.2938		1.60275	2.94495	461	FALSE
ENSG00000109854	HTATIP2	2.29365		2.20365	3.7762	276	TRUE
ENSG00000239779	WBP1	2.29335	1.523	2.275	4.02	269	FALSE
ENSG00000090432	MUL1	2.29295	1.98495	1.6437	2.75865	352	TRUE
ENSG00000134824	FADS2	2.29255	1.64125	1.95485	2.59975	444	FALSE
ENSG00000196312	HIATL2	2.29145	2.5596				FALSE
ENSG00000175606	TMEM70	2.29145	2.0534	2.4837	2.27965	260	TRUE
ENSG00000203778	FAM229B	2.29065	2.5496	3.06235	1.7159	80	FALSE
ENSG00000243927	MRPS6	2.29045		1.78595	2.58855	125	TRUE
ENSG00000132688	NES	2.28905		2.1992	3.1925	1621	FALSE
ENSG00000130402	ACTN4	2.2876	1.2392	1.82575	3.1965	911	FALSE
ENSG00000243317	C7orf73	2.2871	2.80085	2.47315	2.2936	47	FALSE
ENSG00000167920	TMEM99	2.28595	1.43615	2.95125		258	FALSE
ENSG00000169727	GPS1	2.28585	1.57895	1.98045	3.3875	527	FALSE
ENSG00000084693	AGBL5	2.28585	1.93035	2.3384	4.0144	886	FALSE
ENSG00000102144	PGK1	2.28555	0.98875	2.6855	2.11465	417	FALSE
ENSG00000181061	HIGD1A	2.28465	1.1721	2.8972	2.2746	107	TRUE
ENSG00000250722	SEPP1	2.28465	2.5144	2.58665	1.9746	411	FALSE
ENSG00000175193	PARL	2.28325		2.07795	3.2016	379	TRUE
ENSG00000089486	CDIP1	2.2819	0.844	2.47985	2.80115	208	FALSE
ENSG00000110200	ANAPC15	2.28125	2.63835	1.6215	3.4065	125	FALSE
ENSG00000174132	FAM174A	2.2808	2.00365	2.2901	3.0144	190	FALSE
ENSG00000105723	GSK3A	2.2806		1.9639	2.60765	483	FALSE
ENSG00000143222	UFC1	2.2804		2.14175	2.6196	167	FALSE
ENSG00000124772	CPNE5	2.27965	2.5721			593	FALSE
ENSG00000235043	TECRP1	2.27965					FALSE
ENSG00000165591	FAAH2	2.27965				532	FALSE
ENSG00000176485	PLA2G16	2.27855	2.29065	2.8665		162	FALSE
ENSG00000115226	FNDC4	2.27745				234	FALSE
ENSG00000132109	TRIM21	2.2774		2.3069		475	FALSE
ENSG00000042493	CAPG	2.2774				348	FALSE
ENSG00000145337	PYURF	2.2773	2.0217	2.18235	2.7423	71	TRUE
ENSG00000145337	PYURF	2.2773	2.0217	2.18235	2.7423	114	TRUE
ENSG00000198805	PNP	2.2773	0.6297	1.79135	3.3304	289	FALSE
ENSG00000108828	VAT1	2.2769	0.81745	2.2778	2.45455	393	FALSE
ENSG00000105552	BCAT2	2.27585	-0.2125	2.22065	3.6032	392	TRUE
ENSG00000175826	CTDNEP1	2.2758	2.3564	2.1592	2.2418	244	FALSE
ENSG00000139637	C12orf10	2.2755		2.2705		376	TRUE
ENSG00000129244	ATP1B2	2.27535			2.7016	290	FALSE
ENSG00000134595	SOX3	2.2741		2.29205	2.34585	446	FALSE
ENSG00000120533	ENY2	2.27405	1.81895	2.579	2.36965	101	FALSE
ENSG00000115266	APC2	2.27405		1.63695	3.4146	2303	FALSE
ENSG00000005194	CIAPIN1	2.27385		1.67665	2.9605	312	FALSE
ENSG00000183798	EMILIN3	2.2733		1.96465	2.75635	766	FALSE
ENSG00000175110	MRPS22	2.2733		2.3484		360	TRUE
ENSG00000102931	ARL2BP	2.2733	2.80865	2.0384	2.19655	163	FALSE
ENSG00000153574	RPIA	2.272		2.48905	2.0977	311	TRUE
ENSG00000100225	FBXO7	2.2719	1.7703	2.0417	4.23775	522	FALSE
ENSG00000152137	HSPB8	2.27125	3.03335	1.4384	2.91115	196	FALSE
ENSG00000169682	SPNS1	2.2711	1.391	2.5077		528	FALSE
ENSG00000146386	ABRACL	2.27105	2.39545	2.7502	2.2394	81	FALSE
ENSG00000136960	ENPP2	2.27035		1.58315	4.02035	915	FALSE
ENSG00000197191	C9orf169	2.26985				184	FALSE
ENSG00000142230	SAE1	2.2695	1.0679	2.20825	2.47415	346	FALSE
ENSG00000165637	VDAC2	2.26915	1.9491	1.8539	4.9442	309	TRUE
ENSG00000073578	SDHA	2.26845		2.0478	4.24225	664	TRUE
ENSG00000160951	PTGER1	2.26845		2.19745		402	FALSE
ENSG00000149932	TMEM219	2.26675	1.1947	2.52385	1.42215	240	FALSE
ENSG00000130726	TRIM28	2.2664	1.3434	2.24705	3.55855	835	FALSE
ENSG00000174684	B3GNT1	2.26625	2.00495	1.7687	3.81015	415	FALSE
ENSG00000150977	RILPL2	2.26605	2.16845	2.10115	3.2264	211	FALSE
ENSG00000180113	TDRD6	2.2658		2.35125		2096	FALSE
ENSG00000137312	FLOT1	2.26405	1.8642	1.9299	3.6838	427	FALSE
ENSG00000100360	IFT27	2.26365	2.2033	2.1992	2.9467	186	FALSE
ENSG00000131153	GINS2	2.26295	1.9014	2.6628	2.058	185	FALSE
ENSG00000239264	TXNDC5	2.26255	1.5238	1.8672	2.8289	432	FALSE
ENSG00000198680	TUSC1	2.2623		2.1335	2.86765	212	FALSE
ENSG00000204386	NEU1	2.262	1.701	2.1302	2.69455		FALSE
ENSG00000142655	PEX14	2.2618		1.92385	2.62795	377	FALSE
ENSG00000166851	PLK1	2.2616	1.24045	2.0433	3.34535	603	FALSE
ENSG00000176125	UFSP1	2.2609	2.18565	2.1365		142	FALSE
ENSG00000172731	LRRC20	2.2606		2.12555	2.16845	184	FALSE
ENSG00000163704	PRRT3	2.2605		2.12055	3.4549	981	FALSE
ENSG00000171530	TBCA	2.26035	2.79	1.962	2.2628	108	FALSE
ENSG00000168291	PDHB	2.2601		2.0664	2.6678	359	TRUE
ENSG00000205981	DNAJC19	2.2598	2.6573	2.8886	1.4339	116	TRUE
ENSG00000130193	THEM6	2.2595	1.8882	2.6566	2.11715	208	FALSE
ENSG00000142657	PGD	2.25915	0.91485	2.08575	2.9167	483	FALSE
ENSG00000138030	KHK	2.2574	2.0686	1.9563	3.111	298	FALSE
ENSG00000014216	CAPN1	2.25715	0.8331	1.87085	2.96515	714	FALSE
ENSG00000125878	TCF15	2.2571				199	FALSE
ENSG00000106244	PDAP1	2.25695	2.4646	1.62655	2.53875	181	FALSE
ENSG00000067560	RHOA	2.2552	2.06425	2.8292	2.1384	193	FALSE
ENSG00000168273	SMIM4	2.25355	3.2603	3.43615		70	FALSE
ENSG00000130311	DDA1	2.2531	2.5054	2.0758	2.2729	102	FALSE
ENSG00000186897	C1QL4	2.2525	2.18965	2.06695	2.65505	238	FALSE
ENSG00000244274	DBNDD2	2.25205	1.224	2.20975	4.2746	263	FALSE
ENSG00000137106	GRHPR	2.2519	2.90185	2.1084	2.7073	328	TRUE
ENSG00000101294	HM13	2.25185	2.0739	1.90645	3.3824	426	FALSE
ENSG00000109107	ALDOC	2.2511		2.35345	3.0144	364	FALSE
ENSG00000128283	CDC42EP1	2.2511	1.699	2.2104	2.8653	391	FALSE
ENSG00000115255	REEP6	2.2507		2.41805	2.5136	184	FALSE
ENSG00000144591	GMPPA	2.2504	1.476	2.17945	3.5749	420	FALSE
ENSG00000075239	ACAT1	2.25005		2.246	2.1187	427	TRUE
ENSG00000141504	SAT2	2.2499	1.6846	2.1563	2.8347	170	FALSE
ENSG00000176396	EID2	2.2495	1.4222	2.23255	3.06335	236	FALSE
ENSG00000167770	OTUB1	2.24755		1.8925	2.51935	271	FALSE
ENSG00000138136	LBX1	2.2472	2.62555			281	FALSE
ENSG00000188883	KLRG2	2.2472		2.59615		409	FALSE
ENSG00000122026	RPL21	2.24675	1.9294	4.0721		160	FALSE
ENSG00000226174	TEX22	2.24575		1.70365	2.4923	150	FALSE
ENSG00000204592	HLA-E	2.2451		1.76525	2.95285	358	FALSE
ENSG00000104969	SGTA	2.24475	1.10515	1.69325	2.7346	313	FALSE
ENSG00000122490	PQLC1	2.2444	2.58615	2.003	2.3414	271	FALSE
ENSG00000144485	HES6	2.2428	3.29065	1.89395	2.91465	224	FALSE
ENSG00000266066	POLRMTP1	2.24265					FALSE
ENSG00000100612	DHRS7	2.2423		2.28135		339	FALSE
ENSG00000143537	ADAM15	2.24205	0.9222	2.2014	3.67465	863	FALSE
ENSG00000099797	TECR	2.2401	2.1497	2.2644		308	FALSE
ENSG00000115325	DOK1	2.24	1.37495	2.61075		481	FALSE
ENSG00000185813	PCYT2	2.23865	2.9181	1.13295	2.7012	407	FALSE
ENSG00000196230	TUBB	2.2383	1.1744	2.2826	2.4958		FALSE
ENSG00000256269	HMBS	2.23795	1.0496	1.95035	5.28345	361	TRUE
ENSG00000109472	CPE	2.2371	1.70085	2.1345	2.785	476	FALSE
ENSG00000100029	PES1	2.2362		1.5187	3.66885	588	FALSE
ENSG00000175040	CHST2	2.2362				530	FALSE
ENSG00000149179	C11orf49	2.2362		2.07715	2.3942	337	FALSE
ENSG00000174721	FGFBP3	2.236		2.7571	1.4091	258	FALSE
ENSG00000242485	MRPL20	2.2359	2.50155	2.67835	1.51095	149	TRUE
ENSG00000077549	CAPZB	2.2353	1.61645	2.03235	2.7343	301	FALSE
ENSG00000152128	TMEM163	2.2336		1.64975	2.91115	289	FALSE
ENSG00000137142	IGFBPL1	2.2331		2.32895		278	FALSE
ENSG00000143771	CNIH4	2.2327		3.3506	1.15405	139	FALSE
ENSG00000092096	SLC22A17	2.23265		1.85695		538	FALSE
ENSG00000100116	GCAT	2.2322		2.0091	4.14085	445	TRUE
ENSG00000121680	PEX16	2.23175		2.36865	2.1107	346	FALSE
ENSG00000171119	NRTN	2.2309	2.02035	2.2159		197	FALSE
ENSG00000112576	CCND3	2.2308	1.5206	2.04915	2.91995	292	FALSE
ENSG00000104915	STX10	2.23035	2.05815	2.0562	2.7546	249	FALSE
ENSG00000102100	SLC35A2	2.2299		1.90325	2.8525	421	FALSE
ENSG00000138495	COX17	2.2299		2.4155		63	TRUE
ENSG00000111652	COPS7A	2.22935	1.1488	2.2996	2.6396	275	FALSE
ENSG00000170855	TRIAP1	2.2291		2.3936	2.1449	76	TRUE
ENSG00000014641	MDH1	2.22835	0.53045	2.11065	4.3512	352	TRUE
ENSG00000197785	ATAD3A	2.2281	2.26435	1.6122	3.38065	634	TRUE
ENSG00000137331	IER3	2.228		1.86665	2.45665	156	FALSE
ENSG00000159423	ALDH4A1	2.22705		1.8201	2.62665	563	TRUE
ENSG00000182220	ATP6AP2	2.22615		1.9654	2.4705	350	FALSE
ENSG00000153443	UBALD1	2.2249	2.0982	2.07755	2.7335	177	FALSE
ENSG00000164062	APEH	2.22445		2.13005	3.1712	732	FALSE
ENSG00000170860	LSM3	2.2242		2.52335	1.7951	102	FALSE
ENSG00000158301	GPRASP2	2.22375		2.6187		838	FALSE
ENSG00000158301	GPRASP2	2.22375		2.6187		838	FALSE
ENSG00000116260	QSOX1	2.22345	2.47195	1.7158	3.0348	747	FALSE
ENSG00000263470	RP11-160O5.1	2.22195					FALSE
ENSG00000184557	SOCS3	2.2219				225	FALSE
ENSG00000087085	ACHE	2.2219		2.2409		617	FALSE
ENSG00000268218	AC137932.1	2.2219			2.2219		FALSE
ENSG00000183665	TRMT12	2.2219		2.4554	1.8331	448	FALSE
ENSG00000187624	C17orf97	2.2219		1.77965		423	FALSE
ENSG00000268241	AC018470.1	2.2219		2.2219			FALSE
ENSG00000167315	ACAA2	2.22165	1.649	2.3895	3.10845	397	TRUE
ENSG00000105088	OLFM2	2.2211		2.5322	2.33725	454	FALSE
ENSG00000124145	SDC4	2.22075		1.76845	2.34695	198	FALSE
ENSG00000125458	NT5C	2.22045	1.03265	2.12025	2.62295	201	TRUE
ENSG00000090238	YPEL3	2.22015	1.9112	1.84425	2.78125	157	FALSE
ENSG00000105255	FSD1	2.22	1.8294	1.84175	4.68075	496	FALSE
ENSG00000141401	IMPA2	2.21965	2.699	2.17475	2.2609	288	FALSE
ENSG00000115307	AUP1	2.21965	2.8227	2.0984	3.8691	410	FALSE
ENSG00000196839	ADA	2.2195		1.9348	2.1004	363	FALSE
ENSG00000110108	TMEM109	2.21715	1.2847	1.4238	2.79775	243	FALSE
ENSG00000176170	SPHK1	2.21705	1.5477	2.5094	3.06095	470	FALSE
ENSG00000133243	BTBD2	2.21675	3.41115	2.03795	2.42595	525	FALSE
ENSG00000107821	KAZALD1	2.21655	2.7362	2.19635	1.9516	304	FALSE
ENSG00000173638	SLC19A1	2.2155	1.6335	1.7622	3.06225	591	FALSE
ENSG00000100439	ABHD4	2.215			2.52235	342	FALSE
ENSG00000132475	H3F3B	2.2149	1.8002	2.43085	2.3981	136	FALSE
ENSG00000132475	H3F3B	2.2149	1.8002	2.43085	2.3981	136	FALSE
ENSG00000142396	ERVK3-1	2.21465					FALSE
ENSG00000136425	CIB2	2.2126	1.41155	2.34935	2.87095	187	FALSE
ENSG00000103415	HMOX2	2.21125	1.0427	2.464	2.61275	370	FALSE
ENSG00000125744	RTN2	2.2109		1.85655	3.1544	545	FALSE
ENSG00000079739	PGM1	2.2105	2.022	1.87885	3.23085	580	FALSE
ENSG00000163132	MSX1	2.2097	1.49405	2.45815	2.7571	303	FALSE
ENSG00000132432	SEC61G	2.2097	0.78915	3.92215	4.49225	68	FALSE
ENSG00000166313	APBB1	2.20935	1.0559	1.9863	4.8456	710	FALSE
ENSG00000100889	PCK2	2.20855		2.19715		640	TRUE
ENSG00000103257	SLC7A5	2.2084	1.6849	1.82475	2.40035	507	FALSE
ENSG00000102103	PQBP1	2.2084	1.7907	2.25365		265	FALSE
ENSG00000106636	YKT6	2.20655	2.5581	1.6869	2.33645	198	FALSE
ENSG00000166925	TSC22D4	2.20585	1.66075	2.21385	3.1162	395	FALSE
ENSG00000107807	TLX1	2.2055	1.4422	2.17095	2.6388	330	FALSE
ENSG00000026297	RNASET2	2.205	2.31895	1.7185		256	FALSE
ENSG00000091947	TMEM101	2.2048		1.95345	2.55085	257	FALSE
ENSG00000183072	NKX2-5	2.2042	1.67345	2.19285	2.4883	324	FALSE
ENSG00000124688	MAD2L1BP	2.2037		1.84335	3.19025	306	FALSE
ENSG00000061794	MRPS35	2.2037		1.9	2.6024	323	TRUE
ENSG00000155542	SETD9	2.20365				299	TRUE
ENSG00000171984	C20orf196	2.20365				205	FALSE
ENSG00000160014	CALM3	2.20315	2.17155	2.7026	2.09965		FALSE
ENSG00000076043	REXO2	2.20235		2.0056	3.3122	237	TRUE
ENSG00000138772	ANXA3	2.201		2.2219		323	FALSE
ENSG00000103507	BCKDK	2.2006	2.02055	2.22805	2.28655	412	TRUE
ENSG00000167968	DNASE1L2	2.20005	1.38095	2.06945	4.3344	299	FALSE
ENSG00000133398	MED10	2.19875		1.6977	2.67845	135	FALSE
ENSG00000177830	CHID1	2.19875	2.51115	2.35735	1.944	418	FALSE
ENSG00000228594	C1orf233	2.1986		2.3093	2.0961	226	FALSE
ENSG00000115204	MPV17	2.1981		2.43535	2.6082	176	TRUE
ENSG00000103154	NECAB2	2.19725	1.98495	2.79065		386	FALSE
ENSG00000142856	ITGB3BP	2.19685		1.70105	2.52895	216	FALSE
ENSG00000130675	MNX1	2.19665	2.5636	1.94615	2.69245	401	FALSE
ENSG00000185340	GAS2L1	2.19565	2.8683	1.9768	2.1943	681	FALSE
ENSG00000130244	FAM98C	2.19555		1.9816	3.07215	349	FALSE
ENSG00000111237	VPS29	2.19495		2.5507	2.32275	214	FALSE
ENSG00000165474	GJB2	2.19435			2.7514	226	FALSE
ENSG00000139405	C12orf52	2.19435	2.39825	1.75665	2.9837	293	FALSE
ENSG00000125775	SDCBP2	2.1943				292	FALSE
ENSG00000173511	VEGFB	2.1938	2.20865	1.946	3.39185	207	FALSE
ENSG00000116871	MAP7D1	2.19345	1.79595	1.84675	3.36055	841	FALSE
ENSG00000164039	BDH2	2.1925		1.67535	3.31485	245	FALSE
ENSG00000168476	REEP4	2.1924	1.74755	1.97445	4.0366	257	FALSE
ENSG00000162073	PAQR4	2.192	2.53635	2.33605	1.889	273	FALSE
ENSG00000223959	AFG3L1P	2.1919					FALSE
ENSG00000068903	SIRT2	2.19185	0.3664	1.5469	3.7474	389	FALSE
ENSG00000198932	GPRASP1	2.18965		2.1459		1395	FALSE
ENSG00000112149	CD83	2.18835			2.5654	205	FALSE
ENSG00000182704	TSKU	2.1879	1.72765	1.78865	2.7379	353	FALSE
ENSG00000160410	SHKBP1	2.18655		2.0514	4.00735	707	FALSE
ENSG00000155254	MARVELD1	2.1863	2.61685	2.2929	2.0895	173	FALSE
ENSG00000134882	UBAC2	2.18555		1.8101	2.90655	344	FALSE
ENSG00000136522	MRPL47	2.1849		2.2979		250	TRUE
ENSG00000185437	SH3BGR	2.1849				239	FALSE
ENSG00000075624	ACTB	2.1842	1.31465	2.1516	2.4686	375	FALSE
ENSG00000103876	FAH	2.18405	0.91805	2.39245	3.72755	419	FALSE
ENSG00000006118	TMEM132A	2.18285	2.0144	2.143	2.4797	1024	FALSE
ENSG00000196502	SULT1A1	2.18255	1.37495	2.0627	3.60155	295	FALSE
ENSG00000173349	SFT2D3	2.1823		2.4985	1.84135		FALSE
ENSG00000032389	TSSC1	2.18155	2.6721	1.8878	2.93075	387	FALSE
ENSG00000166352	C11orf74	2.18		2.28125		221	FALSE
ENSG00000140391	TSPAN3	2.17845	1.9548	2.7262	1.8732	253	FALSE
ENSG00000161654	LSM12	2.175	2.467		2.1925	195	FALSE
ENSG00000102178	UBL4A	2.17305	1.92945	2.03025	2.2712	157	FALSE
ENSG00000181929	PRKAG1	2.17295	1.8522	1.99325	2.79175	340	FALSE
ENSG00000152234	ATP5A1	2.17295	0.83885	2.27025	3.6843	553	TRUE
ENSG00000114405	C3orf14	2.17215				128	FALSE
ENSG00000115128	SF3B14	2.17145	1.77745	2.06785	3.15155	125	FALSE
ENSG00000181191	PJA1	2.1712		2.008	3.6459	643	FALSE
ENSG00000059573	ALDH18A1	2.1705	0.82275	1.64595	3.22805	795	TRUE
ENSG00000166145	SPINT1	2.1703		1.5258	3.57675	529	FALSE
ENSG00000144647	POMGNT2	2.17025	2.2919	2.0216	2.5197	580	FALSE
ENSG00000164167	LSM6	2.1691	2.20365	2.75715	2.56095	80	FALSE
ENSG00000184281	TSSC4	2.16895	1.8109	2.2748	2.7555	329	FALSE
ENSG00000101843	PSMD10	2.168		1.8275	2.40855	226	FALSE
ENSG00000087302	C14orf166	2.1675	2.15445	2.085	2.59935	244	FALSE
ENSG00000109519	GRPEL1	2.16655		2.31345	2.0831	217	TRUE
ENSG00000170542	SERPINB9	2.1657			1.91115	376	FALSE
ENSG00000149823	VPS51	2.1655		2.09065	3.0952	782	FALSE
ENSG00000010219	DYRK4	2.16545		2.2854		520	FALSE
ENSG00000171169	NAIF1	2.16455		1.88865	2.6624	327	FALSE
ENSG00000228672	PROB1	2.16405		2.17175		1015	FALSE
ENSG00000189410	SH2D5	2.164	2.38285	2.1256	2.09935	423	FALSE
ENSG00000161960	EIF4A1	2.16335	1.1692	1.75145	3.60015	406	FALSE
ENSG00000183624	HMCES	2.16335	1.6075	1.6662	2.7694	354	FALSE
ENSG00000168522	FNTA	2.1632			2.1735	379	FALSE
ENSG00000204237	OXLD1	2.16305		2.185	2.52925	147	TRUE
ENSG00000013306	SLC25A39	2.1617	2.19335	1.7445	3.22355	359	TRUE
ENSG00000171700	RGS19	2.16055	2.31485	1.7502	2.74945	217	FALSE
ENSG00000249992	TMEM158	2.16045	2.01435	2.30445	2.1187	300	FALSE
ENSG00000171551	ECEL1	2.1599		1.7568	3.68965	775	FALSE
ENSG00000162385	MAGOH	2.1595	2.7279	1.829		146	FALSE
ENSG00000214397	DKFZP779J2370	2.15915					FALSE
ENSG00000157992	KRTCAP3	2.15915				240	FALSE
ENSG00000120333	MRPS14	2.15795		2.8061	1.58715	128	TRUE
ENSG00000130204	TOMM40	2.1578	1.9774	2.4013	1.94045	361	TRUE
ENSG00000138172	CALHM2	2.1577	2.0144	2.2639	2.11525	323	FALSE
ENSG00000165688	PMPCA	2.15765		2.01155	2.45875	525	TRUE
ENSG00000088833	NSFL1C	2.1574		1.91445	2.46225	372	FALSE
ENSG00000141934	PPAP2C	2.15685		1.6104		309	FALSE
ENSG00000168569	TMEM223	2.15625		2.34925	1.73645	202	FALSE
ENSG00000116209	TMEM59	2.15485	0.16885	2.465	2.5462	323	FALSE
ENSG00000160221	C21orf33	2.15455	2.98105	1.9547	2.34695	268	TRUE
ENSG00000231925	TAPBP	2.15445	2.19435	2.0529	2.26655		FALSE
ENSG00000204516	MICB	2.1542		1.9311	2.36755	383	FALSE
ENSG00000138663	COPS4	2.15405		1.38095	4.24265	406	FALSE
ENSG00000103495	MAZ	2.1528	2.2267	1.88995	2.723	493	FALSE
ENSG00000197837	HIST4H4	2.15245		2.1891			FALSE
ENSG00000079459	FDFT1	2.1522	0.98995	2.1755	3.2015	476	FALSE
ENSG00000182362	YBEY	2.1514	1.9982	2.16685		167	TRUE
ENSG00000087086	FTL	2.15135	1.44285	2.67135	3.1862	175	FALSE
ENSG00000124588	NQO2	2.15135	2.3373	1.7805		231	FALSE
ENSG00000214999	AC129492.6	2.1509			2.8069		FALSE
ENSG00000270672	MTRNR2L6	2.1509			3.2073		FALSE
ENSG00000139641	ESYT1	2.15065	1.9516	1.705	3.1639	1114	FALSE
ENSG00000166908	PIP4K2C	2.15025		1.559	2.42765	421	FALSE
ENSG00000163902	RPN1	2.15005		1.92015	3.26555	607	FALSE
ENSG00000186577	C6orf1	2.14985	1.1107	2.99715		159	FALSE
ENSG00000185909	KLHDC8B	2.14925		2.26985	2.1399	354	FALSE
ENSG00000183691	NOG	2.14815	2.2219	2.28655	1.9799	232	FALSE
ENSG00000238227	C9orf69	2.148	2.4289	2.1402	1.97315	139	FALSE
ENSG00000099864	PALM	2.1476		1.8252	2.3163	387	FALSE
ENSG00000106348	IMPDH1	2.1475	1.9628	1.5543	3.06635	599	FALSE
ENSG00000214706	IFRD2	2.1468		1.6256	3.94035	506	FALSE
ENSG00000141499	WRAP53	2.1463	1.0347	2.2651		548	FALSE
ENSG00000099284	H2AFY2	2.146	1.67945	2.05805	2.5023	372	FALSE
ENSG00000081181	ARG2	2.144		3.41805		354	TRUE
ENSG00000197457	STMN3	2.14325	1.6083	2.18235	2.27665	180	FALSE
ENSG00000170473	WIBG	2.14315	2.35345	1.72195	2.64205	204	FALSE
ENSG00000186197	EDARADD	2.14315			2.49125	215	FALSE
ENSG00000120265	PCMT1	2.143	1.201	2.07815	2.38595	286	FALSE
ENSG00000142409	ZNF787	2.1419	1.5078	2.07945	2.3569	382	FALSE
ENSG00000107872	FBXL15	2.14175		2.0254	3.45425	300	FALSE
ENSG00000160179	ABCG1	2.14085				678	FALSE
ENSG00000116685	KIAA2013	2.1405	1.9521	2.03905	2.86095	634	FALSE
ENSG00000176428	VPS37D	2.14035		1.82275	2.17215	251	FALSE
ENSG00000100626	GALNT16	2.1403		1.4032	3.12835	558	FALSE
ENSG00000137876	RSL24D1	2.14015		1.9868	2.2104	163	FALSE
ENSG00000051108	HERPUD1	2.13985		1.34165	3.44945	391	FALSE
ENSG00000197894	ADH5	2.1398		1.8847	2.44215	374	FALSE
ENSG00000130560	UBAC1	2.13825	2.6172	1.51595	3.8608	405	FALSE
ENSG00000167680	SEMA6B	2.1381		1.9646	3.2368	888	FALSE
ENSG00000117411	B4GALT2	2.13775	1.87735	2.1264	2.4522	401	FALSE
ENSG00000064666	CNN2	2.1371		1.964	2.26155	309	FALSE
ENSG00000142453	CARM1	2.13665	1.06095	1.6433	2.76505	608	FALSE
ENSG00000116898	MRPS15	2.13615	3.2683	1.97735		257	TRUE
ENSG00000131238	PPT1	2.13585		1.6889	2.55245	306	FALSE
ENSG00000184702	2019-09-05	2.13535	4.1037	1.15575	1.79795	206	FALSE
ENSG00000184702	2019-09-05	2.13535	4.1037	1.15575	1.79795	369	FALSE
ENSG00000184047	DIABLO	2.13475	0.18025	1.76015	3.63175	239	TRUE
ENSG00000126878	AIF1L	2.13465	1.77745	2.4678	2.1292	176	FALSE
ENSG00000104679	R3HCC1	2.1338		2.00905	3.80685	253	FALSE
ENSG00000148426	PROSER2	2.13345		2.422	2.1649	435	FALSE
ENSG00000173163	COMMD1	2.13245		2.4253		190	FALSE
ENSG00000143183	TMCO1	2.13225		1.906	2.3209	239	FALSE
ENSG00000132589	FLOT2	2.13165	1.9537	2.01585	2.23495	428	FALSE
ENSG00000157456	CCNB2	2.12995	2.7422	1.5683	4.256	398	FALSE
ENSG00000150456	N6AMT2	2.1297		2.25715		214	FALSE
ENSG00000108179	PPIF	2.12925	1.1818	1.75275	2.69385	207	TRUE
ENSG00000100220	RTCB	2.12915		1.53415	4.2139	505	FALSE
ENSG00000136238	RAC1	2.1269	2.2223	2.44475	2.0332	211	FALSE
ENSG00000130734	ATG4D	2.1268	2.9606	1.6672	3.67755	474	FALSE
ENSG00000140931	CMTM3	2.1256	1.9646	1.64975	2.86425	182	FALSE
ENSG00000237289	CKMT1B	2.12555					FALSE
ENSG00000184182	UBE2F	2.1253	3.0758	3.0675	1.3534	185	FALSE
ENSG00000163156	SCNM1	2.12525		2.28505		230	FALSE
ENSG00000163156	SCNM1	2.12525		2.28505		195	FALSE
ENSG00000089597	GANAB	2.125		1.37715	3.52215	966	FALSE
ENSG00000169105	CHST14	2.1248	2.18495	1.86105	2.594	376	FALSE
ENSG00000174100	MRPL45	2.12465		1.86535	2.37125	306	TRUE
ENSG00000125505	MBOAT7	2.1244	1.2746	1.86515	2.98955	472	FALSE
ENSG00000151552	QDPR	2.12435		2.0768	2.46465	244	TRUE
ENSG00000205309	NT5M	2.12405	2.2441	2.0427	2.22195	228	TRUE
ENSG00000099282	TSPAN15	2.1238		1.66635	2.98495	294	FALSE
ENSG00000115216	NRBP1	2.1226	0.63045	1.54515	3.41115	535	FALSE
ENSG00000126062	TMEM115	2.1221	2.00685	1.9052	2.85445	351	FALSE
ENSG00000136653	RASSF5	2.12195	1.52575	2.68495	2.1349	418	FALSE
ENSG00000169972	PUSL1	2.1215	1.7609	2.02655	2.8404	303	TRUE
ENSG00000172216	CEBPB	2.12015		1.78595	3.3484	345	FALSE
ENSG00000134590	FAM127A	2.11935	2.75175	1.65815	2.2897	113	FALSE
ENSG00000130751	NPAS1	2.1191		2.21115		590	FALSE
ENSG00000158089	GALNT14	2.1187				557	FALSE
ENSG00000147687	TATDN1	2.1187		1.92945		297	FALSE
ENSG00000138107	ACTR1A	2.1182	2.6256	1.9787	2.20785	376	FALSE
ENSG00000125898	FAM110A	2.1181		2.04065		295	FALSE
ENSG00000107262	BAG1	2.1169		2.5976	1.41905	345	FALSE
ENSG00000124570	SERPINB6	2.1164	0.73705	2.58975	4.43875	395	FALSE
ENSG00000180834	MAP6D1	2.11525		2.41115	1.66845	199	FALSE
ENSG00000159247	TUBBP5	2.11525					FALSE
ENSG00000133313	CNDP2	2.11475	0.7892	1.76005	3.2338	475	FALSE
ENSG00000106537	TSPAN13	2.1142	1.5534	2.82715	1.9065	204	FALSE
ENSG00000137575	SDCBP	2.11285	2.7309	1.8445	2.1485	298	FALSE
ENSG00000111726	CMAS	2.11215		2.0048	2.64925	434	FALSE
ENSG00000137700	SLC37A4	2.112	2.0534	1.576	2.9902	451	TRUE
ENSG00000132394	EEFSEC	2.1119		1.93605	2.9048	596	TRUE
ENSG00000113734	BNIP1	2.11185		1.3662	2.67345	271	FALSE
ENSG00000151353	TMEM18	2.1118	1.83355	2.05565	2.20865	140	FALSE
ENSG00000095380	NANS	2.11135	1.4516	2.29525		359	FALSE
ENSG00000165388	ZNF488	2.11075				340	FALSE
ENSG00000188690	UROS	2.1106	2.19975	1.87435	2.32425	265	FALSE
ENSG00000106266	SNX8	2.1104		1.8646	2.3384	465	FALSE
ENSG00000148334	PTGES2	2.1103	2.2263	1.81705	2.65005	377	TRUE
ENSG00000188322	SBK1	2.1101	2.0643	3.10935	1.80345	424	FALSE
ENSG00000101146	RAE1	2.10975	1.20675	1.94405	2.92965	368	FALSE
ENSG00000143621	ILF2	2.1087		1.91725	3.01095	390	FALSE
ENSG00000197858	GPAA1	2.10855	1.6126	2.08965	3.2113	621	FALSE
ENSG00000142634	EFHD2	2.1082		2.06755	2.18135	240	FALSE
ENSG00000162174	ASRGL1	2.1075	2.9467	2.40815	1.45475	308	FALSE
ENSG00000178127	NDUFV2	2.1074	1.6957	3.1888	-1.97915	249	TRUE
ENSG00000100938	GMPR2	2.1053		1.97795	2.8856	427	FALSE
ENSG00000144120	TMEM177	2.1053	2.9689	2.01185	2.14595	311	TRUE
ENSG00000109016	DHRS7B	2.1046	2.0112	1.95775	3.55865	325	TRUE
ENSG00000116133	DHCR24	2.10435	2.17215	1.45635	2.5126	516	TRUE
ENSG00000184967	NOC4L	2.1042	2.6089	2.01345	3.8646	516	FALSE
ENSG00000197451	HNRNPAB	2.10355	1.28425	2.05005	2.8296	332	FALSE
ENSG00000204619	PPP1R11	2.10355	1.56095	2.20735	2.2374	126	FALSE
ENSG00000188981	MSANTD1	2.1029	3.3033			278	FALSE
ENSG00000125753	VASP	2.1013	1.8	1.95445	2.382	380	FALSE
ENSG00000100600	LGMN	2.10085	0.9827	2.03005	3.7436	433	FALSE
ENSG00000133597	ADCK2	2.10025	2.42945	2.01145		626	TRUE
ENSG00000205534	RP11-345J4.8	2.09995					FALSE
ENSG00000087077	TRIP6	2.09925	2.25365	2.02015	2.8065	476	FALSE
ENSG00000118162	KPTN	2.0988		1.537	5.32465	436	FALSE
ENSG00000168256	NKIRAS2	2.0985	1.9583	1.5771	2.30175	191	FALSE
ENSG00000103150	MLYCD	2.0976		1.9339	2.3993	493	TRUE
ENSG00000125352	RNF113A	2.0975		2.08925		343	FALSE
ENSG00000100211	CBY1	2.097	1.98995	1.17215	2.97435	169	FALSE
ENSG00000171703	TCEA2	2.0968	2.2174	1.9829	1.755	299	FALSE
ENSG00000175592	FOSL1	2.09615			3.3344	271	FALSE
ENSG00000165879	FRAT1	2.09615			2.32585	279	FALSE
ENSG00000079150	FKBP7	2.0961			1.49345	222	FALSE
ENSG00000103855	CD276	2.096	1.7375	1.7973	2.34215	534	FALSE
ENSG00000104213	PDGFRL	2.0958		2.1795		375	FALSE
ENSG00000175274	TP53I11	2.09565	2.2264	2.26235	2.08315	189	FALSE
ENSG00000169957	ZNF768	2.093		2.1118	2.05645	540	FALSE
ENSG00000160752	FDPS	2.0918	2.2758	2.02875	3.9774	419	TRUE
ENSG00000174938	SEZ6L2	2.0914	1.9294	1.9047	2.8102	923	FALSE
ENSG00000147065	MSN	2.091	0.91	1.33745	2.58325	577	FALSE
ENSG00000140497	SCAMP2	2.0909	1.5643	1.77505	2.50145	329	FALSE
ENSG00000175730	BAK1P1	2.0904					FALSE
ENSG00000088727	KIF9	2.0904	2.5144			790	FALSE
ENSG00000185651	UBE2L3	2.0899		2.6786	1.90655	212	FALSE
ENSG00000166033	HTRA1	2.0894		1.6517	3.67695	480	FALSE
ENSG00000168763	CNNM3	2.0877		1.9901	2.34445	707	FALSE
ENSG00000127220	ABHD8	2.0875	2.35345	1.913	2.54075	439	FALSE
ENSG00000068394	GPKOW	2.0875		1.82685	3.84205	476	FALSE
ENSG00000104763	ASAH1	2.0872		1.69415	2.78625	411	FALSE
ENSG00000100567	PSMA3	2.08705		1.83945	3.2362	255	FALSE
ENSG00000257704	PRR24	2.08625		1.9355	2.4998	142	FALSE
ENSG00000148824	MTG1	2.08575			2.26845	334	TRUE
ENSG00000135736	CCDC102A	2.08415		1.8042		550	FALSE
ENSG00000149547	EI24	2.08395	2.03275	1.87975	2.3668	340	FALSE
ENSG00000104833	TUBB4A	2.0838		1.6539	2.7294	495	FALSE
ENSG00000145919	BOD1	2.08325	1.6597	1.95345	2.5512	185	FALSE
ENSG00000184451	CCR10	2.08315				362	FALSE
ENSG00000158483	FAM86C1	2.08315				165	FALSE
ENSG00000159884	CCDC107	2.08275		2.01025		283	FALSE
ENSG00000213722	DDAH2	2.0826	1.31445	2.52015	2.06095		FALSE
ENSG00000180817	PPA1	2.0818	1.9689	1.9291	2.68945	289	FALSE
ENSG00000141696	LEPREL4	2.0814	0.89285	1.73975	3.6456	437	FALSE
ENSG00000168993	CPLX1	2.08125			2.63835	134	FALSE
ENSG00000168286	THAP11	2.0806	1.81605	2.27965	2.1546	314	FALSE
ENSG00000176890	TYMS	2.0799	0.8951	1.988	3.1602	313	FALSE
ENSG00000177383	MAGEF1	2.07985	1.9646	2.3564	1.97485	307	FALSE
ENSG00000135506	OS9	2.07945		1.292	3.2184	667	FALSE
ENSG00000254470	AP5B1	2.07945	2.19535	2.40395	1.07855	878	FALSE
ENSG00000102996	MMP15	2.07935	1.51165	1.8534	2.6953	669	FALSE
ENSG00000100196	KDELR3	2.0792		2.26845		220	FALSE
ENSG00000167513	CDT1	2.07845		1.7891	2.9717	546	FALSE
ENSG00000198721	ECI2	2.0775		1.98185	4.83055	394	TRUE
ENSG00000135549	PKIB	2.07585			2.80685	85	FALSE
ENSG00000137168	PPIL1	2.075		2.62925	2.0902	166	FALSE
ENSG00000184009	ACTG1	2.07465	1.04835	1.73215	2.9025	375	FALSE
ENSG00000130305	NSUN5	2.0746		1.86975	2.63005	470	FALSE
ENSG00000168243	GNG4	2.0745	2.2571		1.89425	75	FALSE
ENSG00000173264	GPR137	2.07425	1.68725	2.22205	3.2571	475	FALSE
ENSG00000111186	WNT5B	2.0741	1.96465	1.7756	2.56785	359	FALSE
ENSG00000152076	CCDC74B	2.074		2.18495		380	FALSE
ENSG00000152076	CCDC74B	2.074		2.18495		378	FALSE
ENSG00000108947	EFNB3	2.07325	1.6687	2.05435	2.24295	340	FALSE
ENSG00000113845	TIMMDC1	2.0731	2.4112	1.73385	2.8522	285	TRUE
ENSG00000173653	RCE1	2.0722		1.772	3.15895	677	FALSE
ENSG00000173653	RCE1	2.0722		1.772	3.15895	329	FALSE
ENSG00000108679	LGALS3BP	2.07185	1.12765	1.66505	3.3471	585	FALSE
ENSG00000172922	RNASEH2C	2.0715	2.74225	2.99655	1.549	164	FALSE
ENSG00000148908	RGS10	2.0715	2.91115	1.61015		181	FALSE
ENSG00000162961	DPY30	2.0706	1.86175	1.7269	3.24955	99	FALSE
ENSG00000091483	FH	2.0703		2.149		510	TRUE
ENSG00000138794	CASP6	2.0699		1.9982		293	FALSE
ENSG00000173812	EIF1	2.0694	1.50105	2.45255	2.29245	113	FALSE
ENSG00000177469	PTRF	2.06925	0.6373	2.09615	2.3915	390	FALSE
ENSG00000153048	CARHSP1	2.06915	1.31545	3.19485	1.56605	147	FALSE
ENSG00000165782	TMEM55B	2.0691	0.85345	1.79195	2.8522	284	FALSE
ENSG00000173456	RNF26	2.06795	1.44545	2.1949	2.45445	433	FALSE
ENSG00000174915	PTDSS2	2.06725	2.7514	1.6092	2.58095	487	FALSE
ENSG00000187140	FOXD3	2.0668		1.92535	2.88285	478	FALSE
ENSG00000176383	B3GNT4	2.06675	2.1256	2.2644		378	FALSE
ENSG00000166189	HPS6	2.0666		2.02145	2.9646	775	FALSE
ENSG00000140395	WDR61	2.06595	1.66175	2.0079	3.62555	305	FALSE
ENSG00000159692	CTBP1	2.06585	1.7561	1.5742	2.5793	440	FALSE
ENSG00000117395	EBNA1BP2	2.0657	1.76755	2.1633	2.1107	361	FALSE
ENSG00000141959	PFKL	2.06555	2.4219	1.5225	3.55145	780	FALSE
ENSG00000145354	CISD2	2.06465	2.04795	2.5464	1.75825	135	TRUE
ENSG00000126903	SLC10A3	2.06465	2.1773	2.0654	1.79065	477	FALSE
ENSG00000134049	IER3IP1	2.0644	3.0904	2.516	1.5224	82	FALSE
ENSG00000178537	SLC25A20	2.0644		1.8534	3.0144	301	TRUE
ENSG00000159479	MED8	2.06355		2.33135	1.75315	301	FALSE
ENSG00000268485	AC104841.2	2.06285	1.1297	1.94975	2.3776		FALSE
ENSG00000132383	RPA1	2.0623	2.21155	1.56865	2.70455	616	FALSE
ENSG00000117308	GALE	2.06205	1.15725	1.7517	3.98565	348	FALSE
ENSG00000122034	GTF3A	2.06155	2.41425	1.8258	3.79065	365	FALSE
ENSG00000133142	TCEAL4	2.0611	1.20795	1.69035	3.54095	215	FALSE
ENSG00000160161	CILP2	2.06095		1.8882	2.70365	1156	FALSE
ENSG00000136718	IMP4	2.06095		2.0409	2.4998	291	FALSE
ENSG00000198835	GJC2	2.06095		2.90185		439	FALSE
ENSG00000124074	ENKD1	2.06095	2.8972	1.64565	4.0496	346	FALSE
ENSG00000198746	GPATCH3	2.06035		1.4813	3.15725	525	FALSE
ENSG00000142173	COL6A2	2.0598	0.99895	1.9133	2.89895	1019	FALSE
ENSG00000154856	APCDD1	2.05925	2.7603	1.631	2.10315	514	FALSE
ENSG00000125740	FOSB	2.05915			2.4689	338	FALSE
ENSG00000170425	ADORA2B	2.0591	2.7264	1.73565		332	FALSE
ENSG00000160226	C21orf2	2.059	2.39615	1.73365	2.81315	375	FALSE
ENSG00000122406	RPL5	2.0586	2.68345	1.81865	2.84165	297	FALSE
ENSG00000108578	BLMH	2.05835	1.9666	1.6273	2.7042	455	FALSE
ENSG00000197380	DACT3	2.0583		2.33865	1.50145	629	FALSE
ENSG00000127418	FGFRL1	2.0578	2.04795	2.3383	1.77495	504	FALSE
ENSG00000176108	CHMP6	2.0574		1.1721	2.4495	201	FALSE
ENSG00000140263	SORD	2.0568		2.29955	2.3375	357	FALSE
ENSG00000105401	CDC37	2.05655	1.4065	1.52765	2.9451	378	FALSE
ENSG00000171298	GAA	2.0565	1.9362	1.6486	3.44985	952	FALSE
ENSG00000158457	TSPAN33	2.05595		1.69305	2.38595	283	FALSE
ENSG00000156515	HK1	2.05575	0.79065	1.5598	3.13275	921	TRUE
ENSG00000072682	P4HA2	2.0557	1.81485	1.44705	3.5397	535	FALSE
ENSG00000168528	SERINC2	2.0555		1.7235	3.53335	464	FALSE
ENSG00000100297	MCM5	2.0554	1.86175	1.72235	3.18885	734	FALSE
ENSG00000186868	MAPT	2.05485	2.16905	1.6459	2.06095	776	FALSE
ENSG00000163870	TPRA1	2.0546	2.05205	1.5628	3.327	373	FALSE
ENSG00000139200	PIANP	2.0545			2.02865	282	FALSE
ENSG00000090661	CERS4	2.05365	1.407	1.6776	4.61915	394	FALSE
ENSG00000184785	SMIM10	2.05295		3.61525	0.9294	83	FALSE
ENSG00000167965	MLST8	2.0522	2.299	1.50295	3.0885	326	FALSE
ENSG00000175213	ZNF408	2.05125		1.96465		720	FALSE
ENSG00000156709	AIFM1	2.05105	1.31645	1.94015	4.03025	613	TRUE
ENSG00000171223	JUNB	2.05055		1.7821	2.19435	347	FALSE
ENSG00000152475	ZNF837	2.05055		1.95775		531	FALSE
ENSG00000214194	LINC00998	2.05015		2.9446	1.9092		FALSE
ENSG00000160087	UBE2J2	2.0484	2.0697	1.80195	2.27825	275	FALSE
ENSG00000110011	DNAJC4	2.04665	2.06545	2.29895		241	TRUE
ENSG00000171311	EXOSC1	2.04625		1.9584	2.24225	195	FALSE
ENSG00000182307	C8orf33	2.045		1.97305	2.0361	229	FALSE
ENSG00000197043	ANXA6	2.04435	0.7921	1.7178	3.3553	673	FALSE
ENSG00000123815	ADCK4	2.0439		1.62395	3.42725	544	TRUE
ENSG00000151500	THYN1	2.04385		2.09035	3.7571	225	FALSE
ENSG00000164889	SLC4A2	2.0432	1.67765	1.9758	4.4313	1241	FALSE
ENSG00000041988	THAP3	2.0431		1.57875	2.49125	239	FALSE
ENSG00000065154	OAT	2.04305		1.78035	2.38195	439	TRUE
ENSG00000183386	FHL3	2.0429	1.3484	1.53545	2.8137	280	FALSE
[truncated: 17,562 more rows]

## Sheet: C.LARP4_eCLIP_HEK293_input
Gene ontology background list (All genes detected in the eCLIP input samples)
ENSG00000166224
ENSG00000102897
ENSG00000010295
ENSG00000147533
ENSG00000106246
ENSG00000168175
ENSG00000117868
ENSG00000174332
ENSG00000159733
ENSG00000117425
ENSG00000140575
ENSG00000106992
ENSG00000167074
ENSG00000143479
ENSG00000119514
ENSG00000108510
ENSG00000234602
ENSG00000085832
ENSG00000100519
ENSG00000121690
ENSG00000080371
ENSG00000117010
ENSG00000182158
ENSG00000151320
ENSG00000171444
ENSG00000039560
ENSG00000173404
ENSG00000101745
ENSG00000162032
ENSG00000111775
ENSG00000167881
ENSG00000169957
ENSG00000137760
ENSG00000168894
ENSG00000135709
ENSG00000106443
ENSG00000197372
ENSG00000128191
ENSG00000181555
ENSG00000051382
ENSG00000137312
ENSG00000115091
ENSG00000139579
ENSG00000105677
ENSG00000155085
ENSG00000172071
ENSG00000176148
ENSG00000198929
ENSG00000129810
ENSG00000047346
ENSG00000128185
ENSG00000179021
ENSG00000173950
ENSG00000187741
ENSG00000178096
ENSG00000148408
ENSG00000166689
ENSG00000138686
ENSG00000188636
ENSG00000172613
ENSG00000197779
ENSG00000165388
ENSG00000099991
ENSG00000115414
ENSG00000128274
ENSG00000135686
ENSG00000126524
ENSG00000135315
ENSG00000169213
ENSG00000144867
ENSG00000053770
lncRNA|lnc-IGSF9B-3
ENSG00000128805
ENSG00000174111
ENSG00000116266
ENSG00000176024
ENSG00000179603
ENSG00000189091
ENSG00000167112
ENSG00000179091
ENSG00000142546
ENSG00000109171
ENSG00000177469
lncRNA|lnc-METTL2B-3
ENSG00000118420
ENSG00000084628
ENSG00000179988
ENSG00000116288
ENSG00000140350
ENSG00000120306
ENSG00000239382
ENSG00000152022
ENSG00000143933
ENSG00000180447
ENSG00000187140
ENSG00000138771
ENSG00000179163
ENSG00000160410
ENSG00000109189
ENSG00000198901
ENSG00000025770
ENSG00000087842
ENSG00000040633
ENSG00000117222
lncRNA|lnc-GOLGA6B-6
ENSG00000164715
ENSG00000091490
ENSG00000147955
ENSG00000171992
ENSG00000165416
ENSG00000099331
ENSG00000123636
ENSG00000178773
lncRNA|RGMB-AS1
ENSG00000099246
ENSG00000215014
ENSG00000110074
ENSG00000127554
ENSG00000094914
ENSG00000186283
ENSG00000108559
ENSG00000185630
ENSG00000205643
ENSG00000112640
ENSG00000165821
ENSG00000204305
ENSG00000101158
ENSG00000088367
ENSG00000023697
ENSG00000133818
ENSG00000106976
ENSG00000108100
lncRNA|NALT1
ENSG00000189339
ENSG00000148396
ENSG00000164109
ENSG00000117143
ENSG00000156876
lncRNA|lnc-SETD1B-2
ENSG00000075407
ENSG00000205339
ENSG00000123268
ENSG00000137486
ENSG00000100221
ENSG00000043039
lncRNA|XIST
ENSG00000025796
ENSG00000101150
ENSG00000174405
ENSG00000140832
ENSG00000187837
ENSG00000228672
ENSG00000102401
ENSG00000086827
ENSG00000269430
ENSG00000205213
ENSG00000130770
ENSG00000145990
ENSG00000107643
ENSG00000101161
ENSG00000141068
ENSG00000112531
ENSG00000147316
ENSG00000153046
ENSG00000205927
ENSG00000095906
ENSG00000119487
ENSG00000083099
ENSG00000165650
ENSG00000176834
ENSG00000115540
ENSG00000204304
ENSG00000213614
ENSG00000147604
ENSG00000108641
ENSG00000065268
lncRNA|lnc-OGFOD3-1
ENSG00000170571
lncRNA|lnc-DHX38-4
ENSG00000167258
ENSG00000174307
ENSG00000013563
ENSG00000172339
ENSG00000165490
ENSG00000154429
ENSG00000204387
ENSG00000114859
ENSG00000007545
ENSG00000100605
ENSG00000078900
ENSG00000178209
ENSG00000180190
ENSG00000163964
ENSG00000185008
ENSG00000103510
ENSG00000165795
ENSG00000135476
ENSG00000074071
ENSG00000136518
ENSG00000059691
ENSG00000167536
ENSG00000123200
ENSG00000109107
ENSG00000135722
ENSG00000102081
ENSG00000163513
ENSG00000196220
ENSG00000145041
ENSG00000106070
ENSG00000138468
ENSG00000112306
ENSG00000228716
ENSG00000196584
ENSG00000065883
ENSG00000129472
ENSG00000143028
ENSG00000104369
ENSG00000184584
ENSG00000122512
ENSG00000196739
ENSG00000163655
ENSG00000184056
ENSG00000087494
ENSG00000152284
ENSG00000231500
ENSG00000117395
ENSG00000136811
ENSG00000167264
ENSG00000162961
ENSG00000181577
lncRNA|lnc-TMC8-4
ENSG00000120837
ENSG00000010803
ENSG00000087995
ENSG00000104332
ENSG00000088881
ENSG00000084112
ENSG00000137628
ENSG00000163138
ENSG00000175595
ENSG00000104067
ENSG00000166888
ENSG00000172366
ENSG00000196411
ENSG00000102100
ENSG00000123552
ENSG00000151338
ENSG00000223496
ENSG00000075391
ENSG00000155508
ENSG00000129474
ENSG00000102158
ENSG00000181192
lncRNA|lnc-PTBP3-4
lncRNA|lnc-PTS-1
ENSG00000033030
ENSG00000134744
ENSG00000156515
ENSG00000167377
ENSG00000125816
lncRNA|lnc-NR2F2-1
ENSG00000143742
ENSG00000134058
ENSG00000151292
ENSG00000115307
ENSG00000115687
ENSG00000158156
ENSG00000111676
ENSG00000198912
ENSG00000164823
lncRNA|lnc-RAD23B-1
ENSG00000131437
ENSG00000162642
ENSG00000163909
ENSG00000172530
ENSG00000170915
ENSG00000100908
ENSG00000091136
ENSG00000135698
ENSG00000178764
ENSG00000164920
ENSG00000106479
ENSG00000176102
ENSG00000122643
ENSG00000159023
ENSG00000163932
ENSG00000151693
ENSG00000107821
ENSG00000141441
ENSG00000137802
ENSG00000107175
ENSG00000256294
ENSG00000134253
ENSG00000158805
ENSG00000198756
ENSG00000172992
ENSG00000166181
lncRNA|lnc-UBAC1-1
ENSG00000224051
ENSG00000105072
ENSG00000023318
ENSG00000156398
ENSG00000137601
ENSG00000176731
ENSG00000100028
ENSG00000168237
lncRNA|lnc-MICAL3-1
ENSG00000212643
ENSG00000135900
ENSG00000131759
ENSG00000109180
ENSG00000133935
ENSG00000132932
ENSG00000184886
ENSG00000105254
ENSG00000165996
ENSG00000185753
ENSG00000196123
ENSG00000181284
ENSG00000085741
ENSG00000111727
lncRNA|DLEU2
ENSG00000257218
ENSG00000135974
ENSG00000104863
ENSG00000164306
ENSG00000141510
ENSG00000131558
ENSG00000112414
ENSG00000113360
ENSG00000143545
ENSG00000063587
ENSG00000121621
ENSG00000106348
ENSG00000145391
ENSG00000167969
ENSG00000198873
ENSG00000203896
ENSG00000172432
ENSG00000137825
ENSG00000139436
ENSG00000185104
ENSG00000079150
ENSG00000117114
ENSG00000088986
ENSG00000070785
ENSG00000197933
ENSG00000170145
ENSG00000196865
ENSG00000215612
ENSG00000106086
ENSG00000090530
ENSG00000155066
ENSG00000141756
ENSG00000142765
ENSG00000120533
ENSG00000124313
ENSG00000185896
ENSG00000166105
ENSG00000182667
ENSG00000174989
ENSG00000163945
ENSG00000114904
ENSG00000165060
ENSG00000139324
lncRNA|LINC00313
ENSG00000253729
ENSG00000078142
ENSG00000118402
ENSG00000138744
ENSG00000170677
ENSG00000023608
ENSG00000120451
ENSG00000164687
ENSG00000165732
ENSG00000102103
ENSG00000183309
ENSG00000150551
ENSG00000185591
ENSG00000074266
ENSG00000198382
ENSG00000229186
ENSG00000188211
ENSG00000101474
ENSG00000164163
ENSG00000130304
ENSG00000003509
ENSG00000213066
ENSG00000102144
ENSG00000145740
ENSG00000075539
ENSG00000110717
ENSG00000147905
ENSG00000090932
ENSG00000104881
ENSG00000139132
ENSG00000056586
lncRNA|lnc-AQP8-2
ENSG00000162104
ENSG00000115310
ENSG00000169758
ENSG00000130844
ENSG00000052749
ENSG00000003756
ENSG00000166311
ENSG00000121848
ENSG00000165283
ENSG00000131475
ENSG00000006625
ENSG00000048028
ENSG00000128789
ENSG00000089022
ENSG00000168779
ENSG00000203950
ENSG00000204310
ENSG00000126351
lncRNA|lnc-PPP6R2-4
ENSG00000204516
ENSG00000171469
ENSG00000147133
ENSG00000106144
ENSG00000183291
ENSG00000159082
ENSG00000154124
lncRNA|lnc-MPHOSPH8-5
ENSG00000069966
ENSG00000160445
ENSG00000154727
ENSG00000268172
ENSG00000102531
lncRNA|lnc-SOX30-3
ENSG00000204149
ENSG00000055211
ENSG00000129315
ENSG00000120688
ENSG00000065150
ENSG00000181744
ENSG00000177125
ENSG00000142627
ENSG00000143641
ENSG00000111707
ENSG00000105737
lncRNA|lnc-LCOR-4
ENSG00000198477
ENSG00000081803
ENSG00000160194
ENSG00000115129
ENSG00000159873
lncRNA|lnc-PDE6D-3
ENSG00000164107
ENSG00000152926
ENSG00000116717
ENSG00000153815
ENSG00000171953
ENSG00000028116
ENSG00000107890
ENSG00000162928
ENSG00000198408
ENSG00000173480
lncRNA|lnc-ZSCAN25-2
ENSG00000100804
ENSG00000168575
ENSG00000106571
ENSG00000078808
ENSG00000172732
ENSG00000140262
ENSG00000154122
ENSG00000108861
ENSG00000049449
ENSG00000171574
lncRNA|lnc-WWOX-4
ENSG00000120256
ENSG00000187736
lncRNA|lnc-RPS25-1
ENSG00000116604
ENSG00000124802
ENSG00000147224
ENSG00000180747
ENSG00000118705
ENSG00000070814
ENSG00000100968
ENSG00000168040
lncRNA|lnc-COPZ2-1
ENSG00000146670
ENSG00000138463
ENSG00000117640
ENSG00000065485
ENSG00000076321
ENSG00000160049
lncRNA|lnc-TRMO-2
ENSG00000137947
ENSG00000147234
ENSG00000154743
lncRNA|lnc-RAB1A-8
ENSG00000100767
ENSG00000130244
ENSG00000186318
ENSG00000103507
ENSG00000197061
ENSG00000182118
lncRNA|lnc-FAAH2-1
ENSG00000161057
ENSG00000170322
ENSG00000029993
ENSG00000166033
ENSG00000106615
ENSG00000251369
ENSG00000131080
ENSG00000133401
ENSG00000167840
ENSG00000116991
ENSG00000079387
ENSG00000146109
ENSG00000100300
ENSG00000185432
ENSG00000145743
ENSG00000204839
ENSG00000090674
lncRNA|lnc-ADAMTSL4-7
ENSG00000106236
ENSG00000143436
ENSG00000162434
ENSG00000197771
ENSG00000126903
ENSG00000167699
ENSG00000185246
lncRNA|lnc-STK25-1
ENSG00000154813
ENSG00000011422
ENSG00000100147
ENSG00000103264
ENSG00000143164
ENSG00000167182
ENSG00000170881
ENSG00000264364
ENSG00000184194
ENSG00000167637
ENSG00000130396
ENSG00000108384
ENSG00000092931
ENSG00000164161
ENSG00000129219
ENSG00000132680
ENSG00000134644
ENSG00000020256
ENSG00000158423
ENSG00000198399
ENSG00000109680
ENSG00000138613
ENSG00000157778
ENSG00000107443
ENSG00000035928
ENSG00000115368
ENSG00000161970
ENSG00000211459
ENSG00000108298
lncRNA|lnc-CFL1-1
ENSG00000167740
ENSG00000109790
ENSG00000058091
ENSG00000196586
ENSG00000215218
ENSG00000086300
ENSG00000150760
ENSG00000158470
ENSG00000185130
ENSG00000197857
ENSG00000183655
ENSG00000136536
ENSG00000107518
ENSG00000002330
lncRNA|lnc-DDT-3
ENSG00000120685
ENSG00000219438
ENSG00000085552
ENSG00000243749
ENSG00000082497
ENSG00000162493
ENSG00000145388
ENSG00000143207
ENSG00000174276
ENSG00000153037
ENSG00000134809
ENSG00000202111
ENSG00000187098
ENSG00000163347
ENSG00000122965
ENSG00000135678
ENSG00000130749
ENSG00000122696
ENSG00000176383
ENSG00000107021
ENSG00000082175
ENSG00000120334
ENSG00000073670
ENSG00000197530
ENSG00000178035
lncRNA|lnc-COL4A2-3
ENSG00000228474
ENSG00000122741
ENSG00000135976
ENSG00000105486
ENSG00000112624
ENSG00000165948
ENSG00000063601
ENSG00000165195
ENSG00000160326
ENSG00000168056
ENSG00000085274
ENSG00000151136
ENSG00000077684
ENSG00000141580
ENSG00000113583
ENSG00000109686
ENSG00000107186
ENSG00000170035
ENSG00000136830
ENSG00000141458
ENSG00000173818
ENSG00000241837
ENSG00000129460
ENSG00000113758
ENSG00000164190
ENSG00000171608
ENSG00000104320
ENSG00000142327
ENSG00000169372
ENSG00000186767
ENSG00000164068
ENSG00000170348
ENSG00000048392
ENSG00000165675
ENSG00000183779
ENSG00000182022
ENSG00000156697
ENSG00000120899
ENSG00000136147
ENSG00000109819
ENSG00000198198
ENSG00000124228
ENSG00000185499
ENSG00000137817
ENSG00000162572
ENSG00000090054
ENSG00000162927
ENSG00000100811
ENSG00000106829
ENSG00000204922
ENSG00000172007
ENSG00000068650
ENSG00000198168
ENSG00000215041
ENSG00000165417
ENSG00000116205
ENSG00000162337
ENSG00000160685
ENSG00000147813
ENSG00000140263
ENSG00000152778
ENSG00000197879
ENSG00000151726
ENSG00000213967
ENSG00000172667
ENSG00000206418
ENSG00000111897
lncRNA|lnc-AGAP5-6
ENSG00000127081
ENSG00000115866
ENSG00000164597
ENSG00000090097
ENSG00000163681
ENSG00000185946
ENSG00000196152
ENSG00000125844
ENSG00000151465
ENSG00000160117
ENSG00000164244
ENSG00000105696
ENSG00000135097
ENSG00000153162
ENSG00000104756
ENSG00000163694
ENSG00000172819
ENSG00000111859
ENSG00000182712
ENSG00000126070
ENSG00000184349
ENSG00000146463
ENSG00000083814
ENSG00000106780
ENSG00000107968
ENSG00000073921
ENSG00000179820
ENSG00000137331
ENSG00000101138
ENSG00000165244
ENSG00000099338
ENSG00000113916
ENSG00000183386
ENSG00000162521
ENSG00000183161
ENSG00000008324
ENSG00000100949
ENSG00000167797
ENSG00000213859
ENSG00000197548
ENSG00000146373
ENSG00000172081
ENSG00000107625
ENSG00000134775
ENSG00000128585
ENSG00000205269
ENSG00000106688
ENSG00000091009
ENSG00000187239
ENSG00000110237
ENSG00000089094
ENSG00000108961
ENSG00000198856
ENSG00000197860
ENSG00000177556
ENSG00000168137
ENSG00000067560
ENSG00000109756
ENSG00000057294
lncRNA|lnc-DYNC1H1-6
ENSG00000075624
ENSG00000183598
ENSG00000103978
ENSG00000116903
ENSG00000180998
ENSG00000109927
ENSG00000139116
ENSG00000106689
ENSG00000143353
ENSG00000115257
ENSG00000167549
ENSG00000160961
ENSG00000133318
ENSG00000105426
ENSG00000162496
ENSG00000229833
ENSG00000062038
ENSG00000163798
ENSG00000010310
ENSG00000106105
ENSG00000197746
ENSG00000074696
ENSG00000092978
ENSG00000124659
ENSG00000204344
ENSG00000147789
ENSG00000154760
ENSG00000186280
ENSG00000221823
ENSG00000123836
ENSG00000008988
ENSG00000009844
ENSG00000166166
ENSG00000105443
ENSG00000138073
ENSG00000134686
ENSG00000174917
ENSG00000198804
ENSG00000121211
ENSG00000185088
ENSG00000095777
ENSG00000180730
ENSG00000196781
ENSG00000162191
ENSG00000160145
ENSG00000115750
ENSG00000221990
ENSG00000100664
ENSG00000233224
ENSG00000163468
ENSG00000196187
ENSG00000257365
ENSG00000175197
ENSG00000126456
ENSG00000115596
ENSG00000152409
ENSG00000065320
ENSG00000149483
ENSG00000115947
ENSG00000170364
ENSG00000085563
ENSG00000083290
ENSG00000169136
ENSG00000169992
ENSG00000164323
ENSG00000198642
ENSG00000148688
ENSG00000243137
ENSG00000117133
ENSG00000184785
ENSG00000198498
ENSG00000172586
ENSG00000153015
ENSG00000184486
ENSG00000186395
ENSG00000176142
ENSG00000136643
ENSG00000200494
ENSG00000158234
ENSG00000205356
ENSG00000143321
ENSG00000068394
ENSG00000047849
ENSG00000165895
ENSG00000148660
ENSG00000165752
ENSG00000198060
ENSG00000243509
ENSG00000196182
lncRNA|PTCSC2
ENSG00000167315
ENSG00000230055
ENSG00000066117
ENSG00000170638
ENSG00000047621
ENSG00000215193
ENSG00000170004
ENSG00000087903
ENSG00000167114
ENSG00000135776
ENSG00000101940
ENSG00000183287
lncRNA|lnc-BCL2L13-3
ENSG00000107282
ENSG00000160917
ENSG00000156860
ENSG00000197562
ENSG00000128564
ENSG00000125351
ENSG00000070061
ENSG00000160285
ENSG00000175137
ENSG00000170873
ENSG00000164933
ENSG00000163013
ENSG00000155330
ENSG00000134369
ENSG00000010292
ENSG00000121741
ENSG00000196966
ENSG00000090316
ENSG00000143622
ENSG00000159915
ENSG00000179841
ENSG00000178234
ENSG00000174720
ENSG00000130024
ENSG00000163110
ENSG00000140905
ENSG00000181481
ENSG00000023572
ENSG00000090006
ENSG00000120942
ENSG00000008735
ENSG00000157657
ENSG00000079102
ENSG00000177352
ENSG00000171316
lncRNA|lnc-SMDT1-3
lncRNA|lnc-ECD-2
ENSG00000070018
ENSG00000184182
ENSG00000144668
ENSG00000048740
ENSG00000187634
ENSG00000135912
ENSG00000111642
ENSG00000138385
ENSG00000143847
ENSG00000171700
ENSG00000075234
ENSG00000169230
ENSG00000111711
ENSG00000205592
ENSG00000227124
ENSG00000110218
ENSG00000078399
ENSG00000152253
ENSG00000134698
ENSG00000183735
lncRNA|PIK3IP1-AS1
ENSG00000157404
ENSG00000177045
ENSG00000101811
ENSG00000101846
ENSG00000112667
ENSG00000133138
ENSG00000145216
ENSG00000131778
ENSG00000145242
ENSG00000151690
ENSG00000143434
ENSG00000125746
ENSG00000135838
ENSG00000168952
ENSG00000180914
ENSG00000119185
ENSG00000171723
ENSG00000004779
ENSG00000169515
ENSG00000109536
ENSG00000102699
ENSG00000001497
ENSG00000117036
ENSG00000165916
ENSG00000166016
ENSG00000163482
ENSG00000177628
ENSG00000177830
ENSG00000167889
ENSG00000100647
ENSG00000104885
ENSG00000134057
ENSG00000184840
ENSG00000125375
ENSG00000171314
ENSG00000130956
lncRNA|lnc-TACC2-8
lncRNA|lnc-CTSV-2
ENSG00000176978
ENSG00000180917
ENSG00000139977
ENSG00000115977
lncRNA|lnc-SIAH1-1
ENSG00000082153
ENSG00000164985
ENSG00000065970
ENSG00000101193
ENSG00000130560
ENSG00000099860
ENSG00000107960
ENSG00000168924
ENSG00000119392
ENSG00000149289
ENSG00000103035
ENSG00000124275
ENSG00000185238
ENSG00000163512
ENSG00000013288
ENSG00000090470
ENSG00000046653
ENSG00000147251
ENSG00000136231
ENSG00000083454
ENSG00000115884
ENSG00000188895
ENSG00000147439
ENSG00000267270
ENSG00000140577
ENSG00000130159
ENSG00000164828
ENSG00000183495
ENSG00000112685
ENSG00000210107
ENSG00000128266
ENSG00000133789
ENSG00000126267
ENSG00000101400
ENSG00000067365
ENSG00000117280
ENSG00000165572
ENSG00000115762
ENSG00000115504
ENSG00000132182
ENSG00000214309
ENSG00000139263
ENSG00000114279
ENSG00000023191
ENSG00000013275
ENSG00000158769
ENSG00000066279
ENSG00000122203
ENSG00000143420
ENSG00000153048
ENSG00000065534
ENSG00000196378
ENSG00000185164
ENSG00000253368
lncRNA|lnc-CTNNA1-4
ENSG00000174373
ENSG00000137955
ENSG00000137944
ENSG00000164237
ENSG00000180398
ENSG00000162769
ENSG00000104343
ENSG00000111716
ENSG00000138111
ENSG00000131069
ENSG00000166133
ENSG00000151923
ENSG00000077463
ENSG00000173334
ENSG00000186260
ENSG00000107331
ENSG00000197217
ENSG00000109814
ENSG00000068912
ENSG00000102882
ENSG00000114450
ENSG00000151353
ENSG00000011258
ENSG00000121064
ENSG00000170522
ENSG00000110700
ENSG00000173171
ENSG00000063177
lncRNA|lnc-PSKH1-1
lncRNA|lnc-C11orf24-4
ENSG00000124098
ENSG00000144048
ENSG00000111554
ENSG00000198286
ENSG00000165186
ENSG00000185950
ENSG00000171848
ENSG00000161513
ENSG00000140853
ENSG00000153201
ENSG00000101346
ENSG00000198799
ENSG00000182180
ENSG00000169860
ENSG00000109046
ENSG00000116691
lncRNA|lnc-CYS1-9
ENSG00000132002
ENSG00000172575
ENSG00000143373
ENSG00000141524
ENSG00000079134
ENSG00000198521
ENSG00000213762
ENSG00000145337
ENSG00000153132
ENSG00000105997
ENSG00000205978
ENSG00000106554
ENSG00000056661
ENSG00000120075
ENSG00000162063
ENSG00000075790
ENSG00000151090
ENSG00000173852
ENSG00000135213
ENSG00000162636
ENSG00000180104
ENSG00000171843
ENSG00000170085
ENSG00000196792
ENSG00000102710
ENSG00000115649
ENSG00000181938
ENSG00000109534
ENSG00000114416
ENSG00000109618
ENSG00000156709
ENSG00000115020
ENSG00000196591
ENSG00000073150
ENSG00000066382
ENSG00000163421
ENSG00000183145
ENSG00000100413
ENSG00000125871
ENSG00000105053
lncRNA|lnc-RECQL4-3
ENSG00000006740
ENSG00000180992
ENSG00000149196
ENSG00000163714
ENSG00000196233
ENSG00000165300
ENSG00000121361
ENSG00000172428
ENSG00000061273
ENSG00000070081
ENSG00000178053
ENSG00000172985
lncRNA|lnc-OR4F6-5
lncRNA|lnc-CYP2E1-13
ENSG00000165392
ENSG00000188976
ENSG00000100612
ENSG00000102921
ENSG00000112130
ENSG00000127774
ENSG00000165272
ENSG00000168461
ENSG00000170584
ENSG00000166263
ENSG00000139173
ENSG00000174498
ENSG00000177951
ENSG00000178922
ENSG00000097033
ENSG00000270170
ENSG00000105447
ENSG00000074855
ENSG00000061987
ENSG00000104853
ENSG00000101654
ENSG00000147471
ENSG00000124749
ENSG00000166557
ENSG00000185917
ENSG00000171227
ENSG00000143457
ENSG00000181826
ENSG00000139546
ENSG00000144659
ENSG00000137100
ENSG00000174469
ENSG00000109705
ENSG00000099800
ENSG00000069509
ENSG00000164347
ENSG00000086232
ENSG00000145592
ENSG00000173933
ENSG00000174796
ENSG00000091640
lncRNA|UBAC2-AS1
ENSG00000110713
ENSG00000167522
ENSG00000182481
ENSG00000196787
ENSG00000169288
ENSG00000036549
ENSG00000132471
ENSG00000181472
ENSG00000198056
ENSG00000148541
ENSG00000131724
ENSG00000187049
ENSG00000172315
ENSG00000112769
ENSG00000115468
ENSG00000106404
ENSG00000105131
ENSG00000165801
ENSG00000154803
ENSG00000196968
ENSG00000146826
ENSG00000153827
ENSG00000155827
ENSG00000144199
ENSG00000154359
ENSG00000144635
ENSG00000170871
ENSG00000204991
ENSG00000103549
ENSG00000187109
lncRNA|lnc-COL6A3-5
ENSG00000137575
ENSG00000167395
ENSG00000165699
ENSG00000125991
ENSG00000123130
ENSG00000066926
ENSG00000196636
ENSG00000164010
lncRNA|lnc-PRSS3-2
ENSG00000101596
ENSG00000152558
lncRNA|lnc-HSBP1L1-1
ENSG00000197448
ENSG00000241973
ENSG00000141522
ENSG00000136378
ENSG00000171282
ENSG00000159917
ENSG00000160050
ENSG00000111530
ENSG00000089234
ENSG00000197021
ENSG00000196284
ENSG00000062485
ENSG00000007202
ENSG00000178028
ENSG00000164983
ENSG00000148498
ENSG00000118596
ENSG00000036672
ENSG00000181045
ENSG00000179918
ENSG00000159110
ENSG00000085224
ENSG00000086712
ENSG00000178538
ENSG00000166123
ENSG00000135124
ENSG00000163605
ENSG00000181404
ENSG00000133624
ENSG00000026103
ENSG00000163686
ENSG00000011347
ENSG00000128714
ENSG00000086189
ENSG00000182004
lncRNA|lnc-XRN2-1
ENSG00000241058
lncRNA|POC1B-AS1
ENSG00000136931
ENSG00000138623
ENSG00000108984
ENSG00000165113
ENSG00000184857
ENSG00000124177
lncRNA|lnc-TRAF6-2
ENSG00000163069
ENSG00000168813
ENSG00000070614
ENSG00000211456
ENSG00000182208
ENSG00000198728
ENSG00000119669
ENSG00000176749
ENSG00000089195
ENSG00000140092
ENSG00000178502
ENSG00000116350
ENSG00000065413
ENSG00000153250
ENSG00000083750
ENSG00000106948
ENSG00000214999
ENSG00000184634
ENSG00000104731
ENSG00000172757
ENSG00000118939
ENSG00000180035
ENSG00000114251
ENSG00000185504
ENSG00000085382
ENSG00000115568
ENSG00000138741
ENSG00000171004
ENSG00000163818
ENSG00000136709
ENSG00000144857
ENSG00000185842
ENSG00000163811
ENSG00000136842
ENSG00000160294
ENSG00000182185
ENSG00000086200
ENSG00000188559
ENSG00000145779
ENSG00000050130
ENSG00000164778
ENSG00000197256
ENSG00000149761
ENSG00000144524
ENSG00000211455
ENSG00000169862
ENSG00000143924
ENSG00000169439
ENSG00000092439
ENSG00000099889
ENSG00000138085
ENSG00000120733
ENSG00000005486
ENSG00000057608
ENSG00000132561
ENSG00000188315
lncRNA|FBXL19-AS1
ENSG00000173020
ENSG00000131375
ENSG00000140941
ENSG00000153707
ENSG00000160256
ENSG00000100154
lncRNA|lnc-IDH3B-2
ENSG00000130222
ENSG00000162004
ENSG00000166986
ENSG00000204764
ENSG00000197121
ENSG00000138821
ENSG00000088538
ENSG00000088833
ENSG00000179912
ENSG00000116863
ENSG00000086544
ENSG00000120705
ENSG00000189180
ENSG00000128915
ENSG00000080986
ENSG00000168495
ENSG00000103995
ENSG00000181751
ENSG00000160602
ENSG00000234616
ENSG00000198088
ENSG00000170577
ENSG00000065308
ENSG00000093183
ENSG00000124279
ENSG00000143674
ENSG00000071859
ENSG00000188766
ENSG00000227057
ENSG00000258881
ENSG00000152402
ENSG00000076513
ENSG00000109099
ENSG00000103152
ENSG00000165006
ENSG00000163820
ENSG00000171517
ENSG00000180979
ENSG00000160714
ENSG00000100994
ENSG00000145495
ENSG00000165716
ENSG00000127720
ENSG00000157216
lncRNA|TMC3-AS1
ENSG00000163539
ENSG00000254004
ENSG00000175216
ENSG00000126453
ENSG00000187867
ENSG00000068697
ENSG00000111581
ENSG00000102858
ENSG00000145725
ENSG00000068745
ENSG00000218739
ENSG00000177030
ENSG00000170469
ENSG00000117899
ENSG00000147654
ENSG00000158850
ENSG00000240891
ENSG00000087470
ENSG00000099256
ENSG00000118507
ENSG00000125820
ENSG00000168724
ENSG00000187147
ENSG00000108306
ENSG00000131381
ENSG00000111664
ENSG00000160113
ENSG00000170802
ENSG00000125962
ENSG00000178988
ENSG00000164398
ENSG00000111237
ENSG00000156140
ENSG00000165152
ENSG00000169031
ENSG00000127526
ENSG00000188807
ENSG00000184939
ENSG00000061794
ENSG00000184900
ENSG00000103852
ENSG00000196208
ENSG00000159363
ENSG00000109944
ENSG00000205542
ENSG00000182220
ENSG00000160298
ENSG00000132356
lncRNA|lnc-AGRP-1
ENSG00000129103
ENSG00000105855
ENSG00000004766
ENSG00000144736
ENSG00000181135
ENSG00000067704
ENSG00000126215
ENSG00000117523
ENSG00000188620
ENSG00000204611
ENSG00000136144
ENSG00000231925
ENSG00000134152
ENSG00000140332
ENSG00000149150
ENSG00000184545
ENSG00000114744
ENSG00000075945
ENSG00000162976
ENSG00000183044
ENSG00000155008
ENSG00000165240
ENSG00000114626
ENSG00000101000
ENSG00000087116
ENSG00000213513
ENSG00000154553
ENSG00000198431
ENSG00000119681
ENSG00000100568
ENSG00000139835
ENSG00000075239
ENSG00000104671
ENSG00000168077
ENSG00000009709
ENSG00000081721
ENSG00000121775
ENSG00000103353
ENSG00000173166
ENSG00000151332
ENSG00000140105
ENSG00000240230
ENSG00000151725
ENSG00000172456
ENSG00000103199
ENSG00000147894
ENSG00000104823
ENSG00000148187
ENSG00000130997
ENSG00000166266
ENSG00000169398
ENSG00000064102
ENSG00000159377
ENSG00000151208
ENSG00000170340
ENSG00000165124
lncRNA|lnc-ITPA-2
ENSG00000002919
ENSG00000053900
ENSG00000130695
ENSG00000125148
ENSG00000135632
ENSG00000180822
ENSG00000198668
ENSG00000185800
ENSG00000106591
ENSG00000100209
ENSG00000128165
ENSG00000137154
ENSG00000108671
ENSG00000158079
ENSG00000006695
ENSG00000138028
ENSG00000256683
ENSG00000180357
ENSG00000205413
ENSG00000133703
ENSG00000152240
ENSG00000135506
ENSG00000119778
ENSG00000143337
ENSG00000008256
ENSG00000198879
ENSG00000011426
ENSG00000150779
ENSG00000160408
ENSG00000205670
ENSG00000184922
ENSG00000185973
ENSG00000247077
ENSG00000168477
ENSG00000147459
ENSG00000146540
ENSG00000105438
ENSG00000186868
ENSG00000115966
ENSG00000134590
ENSG00000130766
ENSG00000144228
ENSG00000112242
ENSG00000163877
ENSG00000170445
ENSG00000055917
ENSG00000177551
ENSG00000166025
ENSG00000173614
ENSG00000112763
ENSG00000142235
ENSG00000173327
ENSG00000100418
ENSG00000196557
ENSG00000145246
ENSG00000183963
ENSG00000128713
ENSG00000141959
ENSG00000187838
ENSG00000104129
ENSG00000181027
ENSG00000221968
lncRNA|LINC01473
ENSG00000100316
ENSG00000100983
ENSG00000174197
lncRNA|lnc-TUFM-3
ENSG00000171798
lncRNA|lnc-ILKAP-6
ENSG00000141741
ENSG00000212126
ENSG00000177108
ENSG00000122515
ENSG00000117461
ENSG00000188243
ENSG00000115274
lncRNA|lnc-CABLES2-7
ENSG00000032444
ENSG00000140264
ENSG00000162231
ENSG00000155313
ENSG00000188971
ENSG00000106714
ENSG00000181274
ENSG00000132825
ENSG00000141759
ENSG00000086289
ENSG00000100364
ENSG00000111907
ENSG00000139697
ENSG00000064655
ENSG00000197324
ENSG00000188522
ENSG00000083635
ENSG00000100027
ENSG00000183011
ENSG00000164074
ENSG00000246705
ENSG00000076641
ENSG00000109881
ENSG00000138592
ENSG00000142798
ENSG00000040275
ENSG00000123360
ENSG00000143970
lncRNA|lnc-PSMB1-6
lncRNA|lnc-PCSK1N-3
ENSG00000124067
ENSG00000005156
ENSG00000198931
ENSG00000115839
ENSG00000132906
ENSG00000158715
ENSG00000162591
ENSG00000087191
ENSG00000167113
ENSG00000102178
ENSG00000162650
ENSG00000138078
ENSG00000132383
ENSG00000066933
ENSG00000110429
ENSG00000132432
lncRNA|lnc-CTPS2-8
ENSG00000110013
ENSG00000172809
ENSG00000179335
ENSG00000121060
ENSG00000120915
ENSG00000153898
ENSG00000100714
ENSG00000135679
ENSG00000144118
ENSG00000143889
ENSG00000174227
ENSG00000054654
ENSG00000176399
ENSG00000124575
ENSG00000119326
ENSG00000060642
ENSG00000151304
ENSG00000213190
ENSG00000186187
ENSG00000188981
ENSG00000101187
ENSG00000221890
ENSG00000113532
ENSG00000117410
ENSG00000161681
ENSG00000263002
ENSG00000176533
ENSG00000145390
lncRNA|lnc-TRMT61B-1
ENSG00000122970
ENSG00000159479
ENSG00000125741
ENSG00000150712
ENSG00000167460
lncRNA|lnc-MBTPS2-1
ENSG00000162384
ENSG00000148303
ENSG00000102309
ENSG00000126870
ENSG00000166169
ENSG00000127564
ENSG00000170632
ENSG00000267796
ENSG00000130787
ENSG00000108264
ENSG00000151665
ENSG00000173227
ENSG00000100151
ENSG00000167216
ENSG00000133863
ENSG00000125944
ENSG00000183691
ENSG00000078804
ENSG00000117411
ENSG00000100485
lncRNA|lnc-TMEM105-4
ENSG00000099364
ENSG00000188026
ENSG00000179941
ENSG00000137124
ENSG00000178694
ENSG00000101413
ENSG00000086065
ENSG00000004777
ENSG00000106025
ENSG00000010278
ENSG00000129696
ENSG00000253598
ENSG00000185900
ENSG00000169020
lncRNA|lnc-HNRNPU-12
ENSG00000142089
ENSG00000119929
ENSG00000103657
ENSG00000164904
ENSG00000151116
ENSG00000095066
ENSG00000078053
ENSG00000166501
ENSG00000184903
ENSG00000136999
ENSG00000120756
ENSG00000147403
ENSG00000174669
ENSG00000188883
ENSG00000104613
ENSG00000034510
ENSG00000087263
ENSG00000111199
ENSG00000177463
ENSG00000006453
ENSG00000177606
ENSG00000157637
ENSG00000082014
ENSG00000204084
ENSG00000187240
ENSG00000140688
ENSG00000104381
ENSG00000060237
ENSG00000162959
ENSG00000130703
ENSG00000204308
ENSG00000072110
ENSG00000112167
ENSG00000135924
lncRNA|lnc-AKT1-1
ENSG00000118260
ENSG00000176155
ENSG00000146197
ENSG00000158813
ENSG00000129925
ENSG00000141644
ENSG00000189362
lncRNA|lnc-PICK1-5
ENSG00000198093
ENSG00000148143
ENSG00000171456
ENSG00000165943
ENSG00000235034
ENSG00000212719
ENSG00000109184
ENSG00000145781
ENSG00000177946
ENSG00000158480
ENSG00000115661
ENSG00000205571
ENSG00000162385
ENSG00000092871
ENSG00000198909
ENSG00000137831
ENSG00000168556
ENSG00000123933
ENSG00000188677
ENSG00000162441
ENSG00000143375
ENSG00000100503
ENSG00000162849
ENSG00000131650
ENSG00000165556
ENSG00000188994
ENSG00000107185
ENSG00000129158
ENSG00000131653
ENSG00000107669
ENSG00000122042
ENSG00000132879
ENSG00000054277
ENSG00000210112
ENSG00000169379
ENSG00000067836
ENSG00000077147
ENSG00000146918
ENSG00000179409
ENSG00000112658
ENSG00000159140
ENSG00000128590
ENSG00000203666
ENSG00000101871
lncRNA|DANT2
ENSG00000173715
ENSG00000108588
ENSG00000197006
ENSG00000113812
ENSG00000130653
ENSG00000114391
ENSG00000196176
ENSG00000160633
ENSG00000108395
ENSG00000120889
ENSG00000054598
ENSG00000164754
ENSG00000121989
ENSG00000149547
ENSG00000214160
ENSG00000161677
ENSG00000162889
ENSG00000198276
ENSG00000066455
ENSG00000152464
ENSG00000147065
ENSG00000170965
ENSG00000166925
ENSG00000170037
lncRNA|lnc-MRPS27-1
ENSG00000163257
ENSG00000070423
ENSG00000143815
ENSG00000136891
ENSG00000168795
ENSG00000170417
ENSG00000149328
ENSG00000106636
ENSG00000034152
ENSG00000122035
ENSG00000124222
ENSG00000260027
lncRNA|lnc-ZFAT-1
ENSG00000184661
ENSG00000243725
ENSG00000130830
ENSG00000114503
ENSG00000166347
ENSG00000214706
ENSG00000126778
ENSG00000076924
ENSG00000177082
ENSG00000171813
ENSG00000122707
ENSG00000095539
ENSG00000114841
ENSG00000005175
ENSG00000127947
ENSG00000134222
ENSG00000163029
ENSG00000182240
ENSG00000088854
ENSG00000167513
ENSG00000110057
ENSG00000212864
ENSG00000140025
lncRNA|lnc-ERCC6-1
ENSG00000072506
ENSG00000168303
ENSG00000185561
ENSG00000112218
ENSG00000133243
ENSG00000183255
ENSG00000143217
ENSG00000105993
ENSG00000160200
ENSG00000171703
ENSG00000075643
ENSG00000227450
ENSG00000120333
ENSG00000136560
ENSG00000128891
ENSG00000186184
ENSG00000164088
ENSG00000102890
ENSG00000120833
ENSG00000110711
ENSG00000185670
ENSG00000173011
ENSG00000204681
ENSG00000120662
ENSG00000204560
ENSG00000145022
ENSG00000163002
ENSG00000198231
ENSG00000127481
ENSG00000197558
ENSG00000134851
ENSG00000115041
ENSG00000126457
ENSG00000123080
ENSG00000178913
ENSG00000165480
ENSG00000137185
ENSG00000172889
ENSG00000129226
ENSG00000137261
ENSG00000049883
ENSG00000109775
ENSG00000224870
ENSG00000171163
ENSG00000013441
ENSG00000102547
ENSG00000250588
ENSG00000058673
ENSG00000107937
ENSG00000066629
ENSG00000179562
ENSG00000167904
ENSG00000174748
ENSG00000083807
ENSG00000124813
ENSG00000114388
ENSG00000166507
ENSG00000097046
ENSG00000043355
ENSG00000164713
ENSG00000186998
ENSG00000213699
ENSG00000151849
ENSG00000102172
ENSG00000090487
ENSG00000184445
lncRNA|lnc-UBE2L5P-2
ENSG00000064763
ENSG00000132485
ENSG00000129347
ENSG00000167244
lncRNA|MALINC1
ENSG00000169032
ENSG00000130881
ENSG00000141934
ENSG00000112984
ENSG00000139197
ENSG00000204920
ENSG00000103326
ENSG00000102554
ENSG00000032389
ENSG00000213901
ENSG00000095139
lncRNA|lnc-PCED1B-5
ENSG00000157895
ENSG00000136279
ENSG00000035687
ENSG00000187801
ENSG00000133019
ENSG00000174444
lncRNA|LNCPRESS1
ENSG00000140830
ENSG00000040487
ENSG00000050327
ENSG00000138166
ENSG00000126581
ENSG00000187325
ENSG00000167523
ENSG00000136274
ENSG00000107140
ENSG00000034693
ENSG00000185298
ENSG00000204130
ENSG00000123983
ENSG00000130511
ENSG00000154265
ENSG00000065357
ENSG00000168958
ENSG00000170425
ENSG00000213694
ENSG00000156026
ENSG00000204469
ENSG00000157191
ENSG00000072310
ENSG00000267855
ENSG00000087152
ENSG00000196705
ENSG00000099904
ENSG00000138622
ENSG00000111674
ENSG00000117500
ENSG00000204463
ENSG00000158169
ENSG00000142227
ENSG00000164124
ENSG00000151135
ENSG00000122691
ENSG00000136146
ENSG00000157890
ENSG00000163743
ENSG00000034533
ENSG00000179295
ENSG00000168438
ENSG00000077942
lncRNA|lnc-BAHCC1-5
ENSG00000182013
ENSG00000087253
ENSG00000015171
ENSG00000100731
ENSG00000164327
ENSG00000183530
ENSG00000173457
lncRNA|lnc-OR4D9-1
ENSG00000102053
ENSG00000130363
ENSG00000025293
ENSG00000151748
ENSG00000123908
ENSG00000206053
ENSG00000019144
ENSG00000123562
ENSG00000243147
ENSG00000179981
ENSG00000165782
ENSG00000163156
ENSG00000120509
ENSG00000135587
ENSG00000143248
ENSG00000135446
ENSG00000146576
ENSG00000141040
ENSG00000153066
ENSG00000166002
ENSG00000179889
ENSG00000134954
lncRNA|lnc-SEMA4D-4
ENSG00000164830
ENSG00000110400
ENSG00000143416
ENSG00000105401
ENSG00000162144
ENSG00000206530
ENSG00000163374
ENSG00000135063
ENSG00000174607
ENSG00000131748
ENSG00000184058
ENSG00000128606
ENSG00000105327
ENSG00000136636
ENSG00000065923
ENSG00000172113
ENSG00000136156
ENSG00000114978
ENSG00000108578
ENSG00000013364
ENSG00000173674
ENSG00000176273
ENSG00000205208
ENSG00000035681
ENSG00000081189
ENSG00000131845
ENSG00000099282
ENSG00000165025
ENSG00000102763
ENSG00000100142
ENSG00000130489
ENSG00000111678
ENSG00000114902
ENSG00000204348
ENSG00000162073
ENSG00000137710
ENSG00000160712
ENSG00000244291
ENSG00000215712
ENSG00000170113
ENSG00000058056
ENSG00000134013
ENSG00000099810
ENSG00000128271
ENSG00000164615
ENSG00000108582
ENSG00000184640
ENSG00000151746
ENSG00000154035
ENSG00000167657
ENSG00000129351
ENSG00000144381
ENSG00000126814
ENSG00000139668
ENSG00000103769
ENSG00000100324
[truncated: 10,109 more rows]

## Sheet: D.Column definitions
A.LARP4_eCLIP_HEK293_by_peaks
ENSG	Ensemble Gene ID
Symbol	Gene name
MitoCarta	TRUE/FALSE
pValue-log10	For largest peak in gene, Average p value of two replicates (-log10)
l2fc_avg(peak)	For largest peak in gene, Average log2[(CLIP-IP)/(CLIP-INput)] of two replicates
-log(pvalue)>7 and l2fc(IP/input)>4	For largest peak in gene, -log(pvalue)>7 and l2fc(IP/input)>4
MitoCarta	Gene is in MitoCarta list TRUE/FALSE
B.LARP4_eCLIP_HEK293_by_region
ENSG	Ensemble Gene ID
Symbol	Gene name
l2fc_avg(all_Exon)	For All_exon regions of gene, Average log2[(CLIP-IP)/(CLIP-INput)] of two replicates
l2fc_avg(5_UTR)	For 5_UTR region of gene, Average log2[(CLIP-IP)/(CLIP-INput)] of two replicates
l2fc_avg(CDS)	Forall CDS regions of gene, Average log2[(CLIP-IP)/(CLIP-INput)] of two replicates
l2fc_avg(3_UTR)	For 3_UTR region of gene, Average log2[(CLIP-IP)/(CLIP-INput)] of two replicates
ProteinLength	ProteinLength
MitoCarta	Gene is in MitoCarta list TRUE/FALSE
C.LARP4_eCLIP_HEK293_input
Gene ontology background list (All genes detected in the eCLIP input samples)	Gene ontology background list (All genes detected in the eCLIP input samples)
