# Supplementary material
Source: HighWire-hosted journal article supplement (doi:10.1101/rna.079799.123)

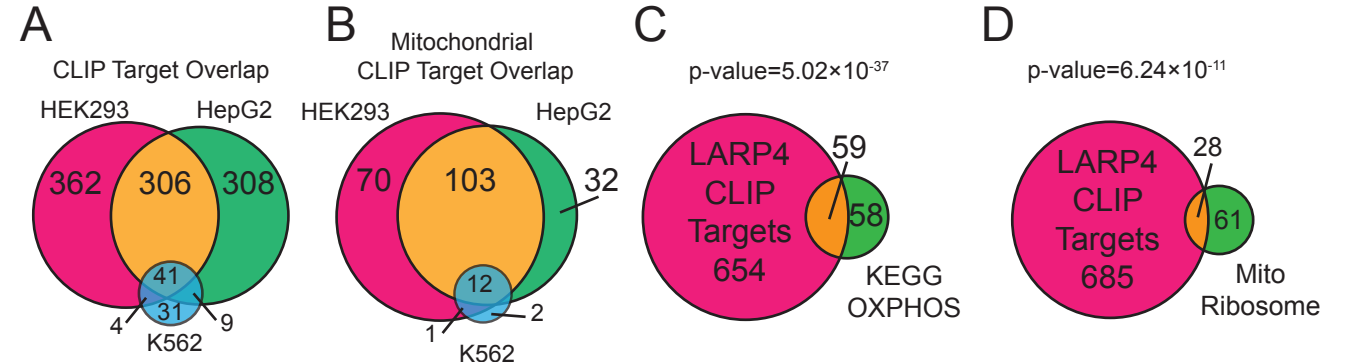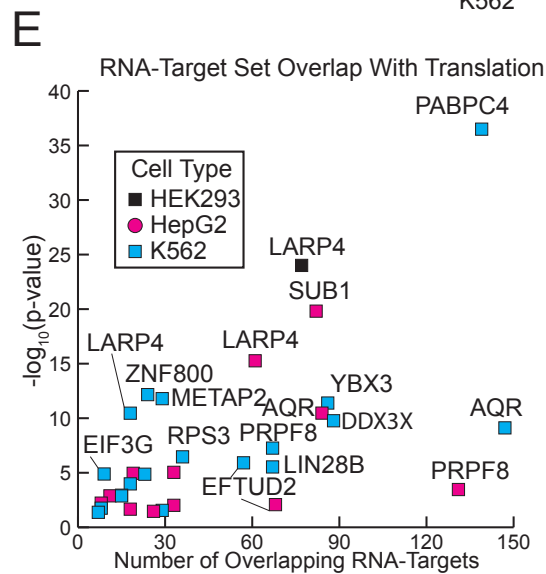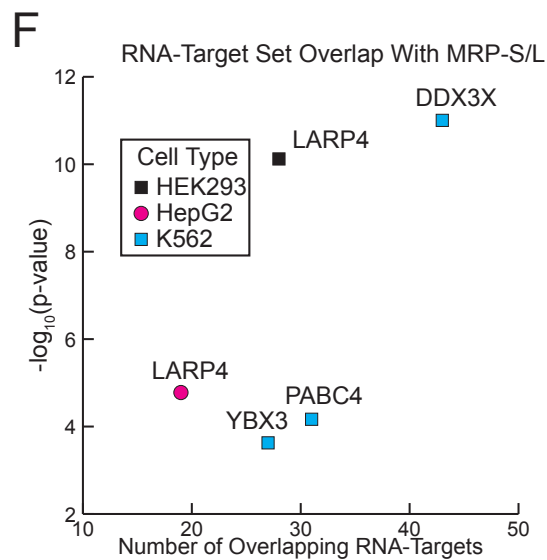

**G** Metagenome Analysis of LARP4 eCLIP Datasets

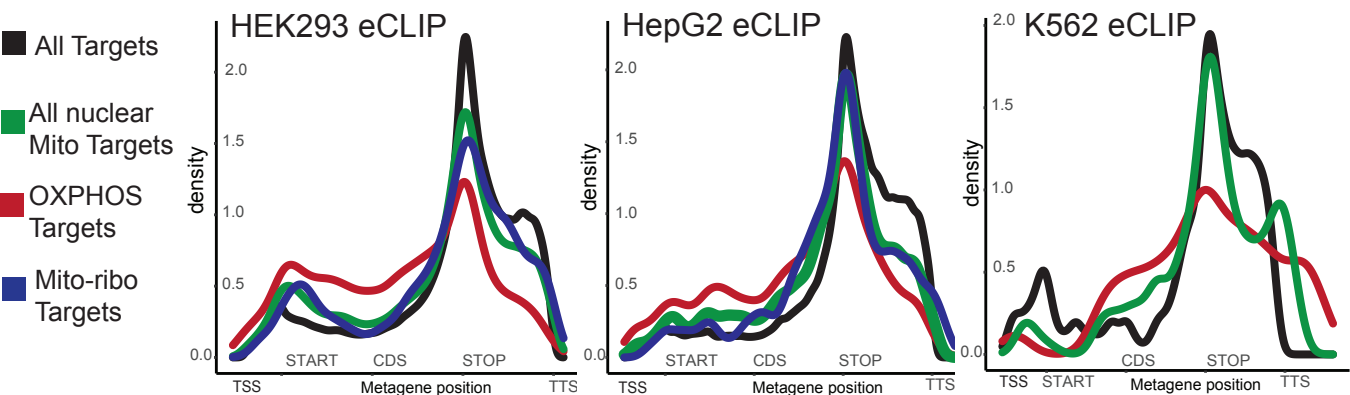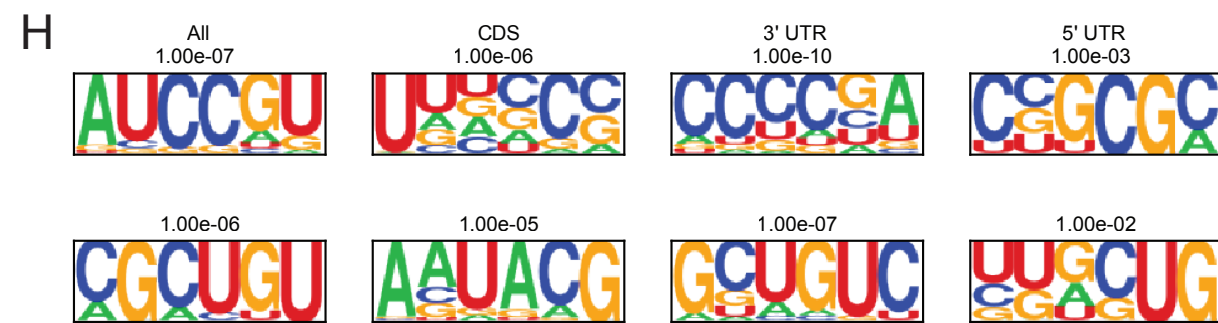

Supplement: Supplemental_Fig_S1.pdf [file Supplemental_Fig_S1.pdf]

**A**

Total Protein Stain

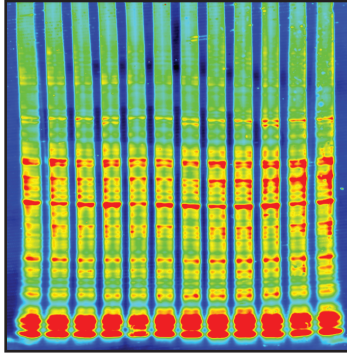**B**

Total Protein Stain

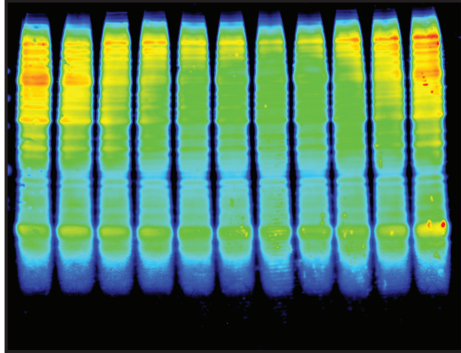

Supplement: Supplemental_Fig_S3.pdf [file Supplemental_Fig_S3.pdf]
